# Supplementary material for: Condensin controls recruitment of RNA polymerase II to achieve nematode X-chromosome dosage compensation
Source: eLife. 2013 Jun 18;2:e00808. doi: 10.7554/eLife.00808 (PMC3687364; doi:10.7554/eLife.00808)
Supplement: Figure 1—source data 1. — The number of reads from each replicate of GRO-seq, GRO-cap, and ChIP-seq that uniquely aligned to the Caenorhabditis elegans genome are listed. DOI: http://dx.doi.org/10.7554/eLife.00808.004 [file elife00808s001.xls]

## Sheet: Sheet1
Figure 1—source data 1
	Experiment	Uniquely aligning reads
	GRO-seq Control RNAi Embryo replicate 1	31817492
	GRO-seq Control RNAi Embryo replicate 2	34404347
	GRO-seq Wild-Type Embryo replicate 1	4589302
	GRO-seq Wild-Type Embryo replicate 2	27796123
	GRO-seq Wild-Type Starved L1 replicate 1	9011426
	GRO-seq Wild-Type Starved L1 replicate 2	25028150
	GRO-seq Wild-Type L3 replicate 1	18794558
	GRO-seq Wild-Type L3 replicate 2	29384660
	GRO-seq sdc-2 (y93, RNAi) mutant Embryo replicate 1	32121182
	GRO-seq sdc-2 (y93, RNAi) mutant Embryo replicate 2	23882313
	GRO-cap Wild-Type Embryo TAP+	37748684
	GRO-cap Wild-Type Embryo TAP-	14724352
	GRO-cap Wild-Type Starved L1 TAP+	44669851
	GRO-cap Wild-Type Starved L1 TAP-	10983091
	GRO-cap Wild-Type L3 TAP+	38258637
	GRO-cap Wild-Type L3 TAP-	15993030
	GRO-cap sdc-2 (y93, RNAi) mutant Embryo TAP+	34955969
	GRO-cap sdc-2 (y93, RNAi) mutant Embryo TAP-	14276586
	ChIP-seq Wild-Type Embryo anti-DPY-27 replicate 1	3801181
	ChIP-seq Wild-Type Embryo anti-DPY-27 replicate 2	6197902
	ChIP-seq Wild-Type Embryo anti-IgG replicate 1	3709907
	ChIP-seq Wild-Type Embryo anti-IgG replicate 2	5793566
