# Supplementary material for: Condensin controls recruitment of RNA polymerase II to achieve nematode X-chromosome dosage compensation
Source: eLife. 2013 Jun 18;2:e00808. doi: 10.7554/eLife.00808 (PMC3687364; doi:10.7554/eLife.00808)
Supplement: Figure 1—source data 2. — Annotation of transcription start sites for protein-coding genes. DOI: http://dx.doi.org/10.7554/eLife.00808.005 [file elife00808s002.xls]

## Sheet: Genes_with_a_TSS
Chromosome	WBGeneID	Gene Name	Strand	WS230 Begin	WB230 End	If Two or More Protein-Coding Isoforms, Do They Have the Same TSS?	.	DCC Mutant Embryo: TSS	Wild-Type Embryo: TSS	Wild-Type StarvedL1: TSS	Wild-Type L3: TSS	.	DCC Mutant Embryo: Difference Between TSS and WB Start	Wild-Type Embryo: Difference Between TSS and WB Start	Wild-Type StarvedL1: Difference Between TSS and WB Start	Wild-Type L3: Difference Between TSS and WB Start	.	Allen et al (2011) TSA Position with the most SL1 reads Converted to WS230	Allen et al (2011) SL1 Reads	Allen et al (2011) SL2 and SL2 Variant Reads	.	DCC Mutant Embryo: Outron Length (Distance between TSS and TSA Position)	Wild-Type Embryo: Outron Length (Distance between TSS and TSA Position)	Wild-Type StarvedL1: Outron Length (Distance between TSS and TSA Position)	Wild-Type L3: Outron Length (Distance between TSS and TSA Position)
chrV	WBGene00000003	aat-2	-1	9244389	9246337		.	9247545	9247545			.	1208	1208			.	9246337	194	1	.	1208	1208
chrX	WBGene00000004	aat-3	1	2554222	2557718		.	2553955	2554029			.	267	193			.	2554224	189	3	.	269	195
chrI	WBGene00000006	aat-5	-1	2571778	2576024	Same TSS	.		2577231	2577110	2577413	.		1207	1086	1389	.	2576022	319	2	.		1209	1088	1391
chrX	WBGene00000017	abf-6	1	12794107	12794803		.				12794089	.				18	.	12794210	2	0	.				121
chrX	WBGene00000018	abl-1	-1	10605769	10624122	Different TSS	.	10624265	10624265	10624261	10624265	.	143	143	139	143	.	10624137	114	0	.	128	128	124	128
chrV	WBGene00000022	abt-4	-1	323778	330728		.				332655	.				1927	.	330726	52	0	.				1929
chrV	WBGene00000031	abu-8	-1	5192977	5194592		.	5195103				.	511				.				.
chrX	WBGene00000033	abu-10	1	3798163	3799725		.				3798165	.				-2	.				.
chrII	WBGene00000034	abu-11	-1	192531	194558		.				194557	.				-1	.				.
chrI	WBGene00000036	ace-2	-1	3302094	3307467		.			3307926	3309683	.			459	2216	.	3307587	163	0	.			339	2096
chrX	WBGene00000039	acn-1	-1	5092250	5097042	Same TSS	.	5097543	5099854		5099859	.	501	2812		2817	.	5097036	739	0	.	507	2818		2823
chrX	WBGene00000040	aco-1	1	11339808	11343504		.	11339733	11339656	11339733	11339733	.	75	152	75	75	.	11339810	1158	1	.	77	154	77	77
chrIII	WBGene00000041	aco-2	1	7973652	7977260	Different TSS	.	7973440	7973398	7973440	7973398	.	212	254	212	254	.	7973652	2771	16	.	212	254	212	254
chrX	WBGene00000042	acr-2	1	6702653	6709263		.				6702590	.				63	.				.
chrX	WBGene00000047	acr-8	1	10412703	10416596		.				10412680	.				23	.	10412665	129	0	.				-15
chrX	WBGene00000048	acr-9	-1	13642278	13646828		.				13646768	.				-60	.				.
chrX	WBGene00000051	acr-12	1	13532851	13536324		.				13532889	.				-38	.				.
chrV	WBGene00000063	act-1	1	11079149	11082479		.		11078577	11078572	11078572	.		572	577	577	.	11081034	1275	12	.		2457	2462	2462
chrV	WBGene00000064	act-2	-1	11076719	11078150		.	11078503	11078503	11078503	11078518	.	353	353	353	368	.	11078136	10889	42	.	367	367	367	382
chrV	WBGene00000065	act-3	-1	11071666	11074480		.	11074475	11074475	11075667	11074475	.	-5	-5	1187	-5	.	11073246	1136	51	.	1229	1229	2421	1229
chrX	WBGene00000066	act-4	1	4960522	4964385	Different TSS	.	4960587	4960587	4960589	4960589	.	-65	-65	-67	-67	.	4962769	4	0	.	2182	2182	2180	2180
chrIII	WBGene00000067	act-5	-1	13604238	13605967		.	13606141	13606143	13606141	13606141	.	174	176	174	174	.	13605965	5756	17	.	176	178	176	176
chrIII	WBGene00000068	acy-1	1	4722177	4730835		.	4722090	4722090	4722090	4722090	.	87	87	87	87	.				.
chrIII	WBGene00000070	acy-3	-1	3774875	3786718		.	3786545	3786539	3786539	3786545	.	-173	-179	-179	-173	.				.
chrV	WBGene00000071	acy-4	-1	5624707	5630876		.				5633118	.				2242	.	5630876	12	0	.				2242
chrV	WBGene00000073	add-2	-1	12009532	12013586	Different TSS	.				12013568	.				-18	.	12011746	187	2	.				1822
chrX	WBGene00000074	adm-2	1	13687903	13695721		.	13687254	13687254	13687148	13687254	.	649	649	755	649	.	13687891	501	1	.	637	637	743	637
chrX	WBGene00000075	adm-4	-1	7794993	7798236		.	7798443	7798443		7798443	.	207	207		207	.	7798241	72	1	.	202	202		202
chrI	WBGene00000079	adr-1	1	7773411	7777572	Same TSS	.		7772757		7772747	.		654		664	.	7773413	1468	4	.		656		666
chrX	WBGene00000083	adt-2	1	7585539	7595441	Different TSS	.			7585633	7585633	.			-94	-94	.	7586062	90	0	.			429	429
chrI	WBGene00000084	aex-1	1	7602307	7608241	Same TSS	.			7602306	7602306	.			1	1	.				.
chrX	WBGene00000086	aex-3	-1	751210	759731	Same TSS	.	760628	760628		760636	.	897	897		905	.	759731	73	0	.	897	897		905
chrX	WBGene00000092	ags-3	-1	5289696	5298008	Same TSS	.	5298213	5298217	5298213	5298213	.	205	209	205	205	.	5298008	346	2	.	205	209	205	205
chrII	WBGene00000094	agt-2	-1	5371789	5373404		.		5373372		5373372	.		-32		-32	.				.
chrI	WBGene00000095	aha-1	-1	10193916	10196990	Same TSS	.	10197174	10197174	10197172	10197174	.	184	184	182	184	.	10196988	176	1	.	186	186	184	186
chrV	WBGene00000097	aip-1	1	14012318	14013629		.	14012540			14012540	.	-222			-222	.	14012562	390	1	.	22			22
chrV	WBGene00000098	air-1	1	8221390	8223567		.	8221351	8221351		8221351	.	39	39		39	.	8221468	2177	3	.	117	117		117
chrI	WBGene00000099	air-2	1	5937479	5938887		.		5937167			.		312			.	5937479	322	0	.		312
chrII	WBGene00000101	aka-1	-1	7472685	7478914	Same TSS	.	7478763	7478763	7478753	7478763	.	-151	-151	-161	-151	.	7478493	1875	7	.	270	270	260	270
chrV	WBGene00000102	akt-1	1	10248880	10252870	Same TSS	.	10247176	10247176	10246616	10247176	.	1704	1704	2264	1704	.	10248882	1157	3	.	1706	1706	2266	1706
chrX	WBGene00000103	akt-2	1	14147631	14152001	Same TSS	.			14145897	14146976	.			1734	655	.	14147631	357	1	.			1734	655
chrX	WBGene00000105	alg-1	1	13949073	13956187	Different TSS	.	13948326	13948326		13948326	.	747	747		747	.	13949047	297	0	.	721	721		721
chrII	WBGene00000106	alg-2	1	873183	878961	Different TSS	.	873262	873262			.	-79	-79			.	874167	245	2	.	905	905
chrIII	WBGene00000107	alh-1	1	5077725	5080636	Different TSS	.	5077327	5077342	5077327	5077327	.	398	383	398	398	.	5077727	1696	6	.	400	385	400	400
chrV	WBGene00000111	alh-5	-1	1996108	1999580		.				1999900	.				320	.	1999580	433	0	.				320
chrII	WBGene00000112	alh-6	-1	1306247	1310140	Different TSS	.	1310373		1310373	1310382	.	233		233	242	.	1309761	1183	1	.	612		612	621
chrII	WBGene00000114	alh-8	1	11728886	11731163	Same TSS	.		11728972	11728975	11728975	.		-86	-89	-89	.	11728992	7665	224	.		20	17	17
chrX	WBGene00000116	alh-10	-1	7140459	7143598		.	7143597	7143597	7143597	7143597	.	-1	-1	-1	-1	.				.
chrIII	WBGene00000118	alh-12	1	7453947	7455917	Same TSS	.		7453898	7453898	7453898	.		49	49	49	.	7454016	451	2	.		118	118	118
chrIV	WBGene00000120	aly-1	1	9108916	9109736		.	9107689	9107689			.	1227	1227			.	9108916	633	4	.	1227	1227
chrIV	WBGene00000122	aly-3	1	12123133	12124788		.	12123126	12123108	12123091	12123108	.	7	25	42	25	.	12123267	903	135	.	141	159	176	159
chrIV	WBGene00000123	ama-1	1	4248061	4258166		.	4247601	4247601		4247601	.	460	460		460	.	4248063	302	5	.	462	462		462
chrX	WBGene00000136	amt-4	1	4565276	4569367		.				4564951	.				325	.	4565276	410	0	.				325
chrV	WBGene00000139	amx-3	-1	20898906	20903410	Different TSS	.	20903513			20903513	.	103			103	.				.
chrI	WBGene00000140	anc-1	1	4321096	4359106		.	4320971	4320964		4320888	.	125	132		208	.				.
chrIII	WBGene00000143	apc-2	1	8080547	8083630		.		8080360			.		187			.	8080603	149	1	.		243
chrV	WBGene00000146	ape-1	1	11675924	11685259	Different TSS	.	11674215	11674215	11674215	11674217	.	1709	1709	1709	1707	.	11675926	558	4	.	1711	1711	1711	1709
chrX	WBGene00000149	apl-1	-1	5112403	5116839	Same TSS	.	5124487	5122946	5116706	5119295	.	7648	6107	-133	2456	.	5116835	1748	6	.	7652	6111	-129	2460
chrI	WBGene00000150	apm-1	-1	5342181	5344727		.		5345278	5345328	5345278	.		551	601	551	.	5344727	405	1	.		551	601	551
chrI	WBGene00000155	app-1	-1	4964668	4967330		.				4967222	.				-108	.	4967090	570	6	.				132
chrX	WBGene00000157	aps-2	1	4458247	4459242		.	4458138	4458131	4458138	4458138	.	109	116	109	109	.	4458247	1746	2	.	109	116	109	109
chrI	WBGene00000158	apg-1	1	14406016	14417916		.		14405785		14405785	.		231		231	.	14406016	346	1	.		231		231
chrV	WBGene00000159	aps-1	1	6017951	6018867		.		6017852			.		99			.	6017953	1823	12	.		101
chrIII	WBGene00000160	apb-1	-1	2583965	2597027	Same TSS	.	2597194	2597210	2597181	2597210	.	167	183	154	183	.	2597025	231	5	.	169	185	156	185
chrII	WBGene00000162	apd-3	-1	3532529	3546436	Different TSS	.	3547443	3547431		3547443	.	1007	995		1007	.	3546434	265	1	.	1009	997		1009
chrX	WBGene00000164	apm-3	1	954932	957760		.	954849	954849		954849	.	83	83		83	.	954514	2	0	.	-335	-335		-335
chrI	WBGene00000165	aps-3	-1	1155346	1156023		.		1156114		1156126	.		91		103	.	1156023	1233	5	.		91		103
chrX	WBGene00000166	apt-9	1	11068461	11071859		.		11068537		11068681	.		-76		-220	.				.
chrII	WBGene00000170	aqp-2	-1	9258853	9261934	Same TSS	.	9262086	9262086	9262086	9262086	.	152	152	152	152	.	9261919	7617	17	.	167	167	167	167
chrX	WBGene00000175	aqp-7	1	3025052	3026961		.			3024105	3024105	.			947	947	.	3025526	358	5	.			1421	1421
chrII	WBGene00000178	aqp-10	-1	9768392	9769793		.	9770209	9770209		9770209	.	416	416		416	.	9769788	731	6	.	421	421		421
chrIII	WBGene00000179	aqp-11	1	13673177	13674644		.		13672770			.		407			.	13673179	801	0	.		409
chrIV	WBGene00000181	ard-1	1	11131256	11133764		.	11131291				.	-35				.	11131258	858	662	.	-33
chrIII	WBGene00000182	arf-1.2	1	5716068	5717538		.	5715740	5715740	5715750	5715740	.	328	328	318	328	.	5716070	3899	987	.	330	330	320	330
chrIV	WBGene00000183	arf-3	1	7982512	7983888		.	7982251	7982251	7982254	7982251	.	261	261	258	261	.	7982514	2710	20	.	263	263	260	263
chrIV	WBGene00000184	arf-6	1	16947094	16949514		.		16946963			.		131			.	16947086	760	2	.		123
chrIV	WBGene00000186	ark-1	-1	12622061	12630999	Same TSS	.	12637392	12635273		12632435	.	6393	4274		1436	.	12630999	253	1	.	6393	4274		1436
chrIV	WBGene00000192	arl-8	1	14798108	14799278		.	14797544	14797544	14797548	14797548	.	564	564	560	560	.	14798117	2409	7	.	573	573	569	569
chrX	WBGene00000195	arr-1	1	950779	954230		.	949782	949786	949782	949786	.	997	993	997	993	.	950779	227	3	.	997	993	997	993
chrII	WBGene00000196	aars-1	-1	11460099	11464015		.		11464001		11464413	.		-14		398	.				.
chrI	WBGene00000197	aars-2	1	3983174	3986918		.	3982986	3982993	3982986	3982993	.	188	181	188	181	.	3983187	1575	4	.	201	194	201	194
chrII	WBGene00000198	art-1	-1	6970626	6972195		.				6972428	.				233	.	6972193	588	687	.				235
chrI	WBGene00000199	arx-1	-1	2883498	2893720		.	2895171	2895172	2895171	2895172	.	1451	1452	1451	1452	.	2893720	1388	147	.	1451	1452	1451	1452
chrV	WBGene00000200	arx-2	-1	10335241	10338334		.		10338713			.		379			.	10338332	822	5	.		381
chrIII	WBGene00000201	arx-3	-1	12052328	12058358		.	12058476	12058476	12058476	12058476	.	118	118	118	118	.	12058358	462	4	.	118	118	118	118
chrIII	WBGene00000204	arx-6	1	4878622	4879661		.	4878502	4878493		4878493	.	120	129		129	.	4878624	1912	3	.	122	131		131
chrI	WBGene00000205	arx-7	-1	3069234	3070142		.		3070244	3070244		.		102	102		.	3070152	506	9	.		92	92
chrIII	WBGene00000206	asb-1	-1	4594509	4595912		.				4595932	.				20	.	4595789	1936	230	.				143
chrX	WBGene00000207	asb-2	1	4469718	4471455		.	4469525	4469525	4469525	4469525	.	193	193	193	193	.	4469741	4677	15	.	216	216	216	216
chrI	WBGene00000209	asg-1	1	8692938	8693463		.		8692677		8692677	.		261		261	.	8692940	5374	35	.		263		263
chrX	WBGene00000210	asg-2	1	6841216	6842164		.		6841064		6841064	.		152		152	.	6841218	5539	15	.		154		154
chrV	WBGene00000214	asp-1	-1	19049094	19050796		.	19051474			19051474	.	678			678	.	19050726	40245	66	.	748			748
chrX	WBGene00000216	asp-3	1	6791025	6792676		.	6791134	6791134	6791134	6791134	.	-109	-109	-109	-109	.	6791027	58	0	.	-107	-107	-107	-107
chrX	WBGene00000217	asp-4	-1	13218908	13221400		.	13221376	13221380	13221376	13221376	.	-24	-20	-24	-24	.				.
chrV	WBGene00000218	asp-5	1	8272355	8274027		.				8272236	.				119	.	8272365	23581	138	.				129
chrV	WBGene00000219	asp-6	-1	8267526	8268919		.			8269018	8269018	.			99	99	.	8268917	12031	31	.			101	101
chrII	WBGene00000220	atf-2	1	8751933	8753886		.	8748306	8748306		8749273	.	3627	3627		2660	.	8751933	95	0	.	3627	3627		2660
chrX	WBGene00000221	atf-5	-1	14809088	14810780		.	14810754	14810754	14810754	14810754	.	-26	-26	-26	-26	.				.
chrX	WBGene00000222	atf-6	1	12480880	12484811		.	12480698	12480698	12480698	12480698	.	182	182	182	182	.	12480880	106	4	.	182	182	182	182
chrIV	WBGene00000224	atgp-1	1	17269305	17272147	Different TSS	.	17268881	17268881	17268897	17268881	.	424	424	408	424	.	17269305	610	0	.	424	424	408	424
chrII	WBGene00000225	atgp-2	-1	14640021	14644010	Different TSS	.		14645439			.		1429			.	14644008	276	1	.		1431
chrV	WBGene00000226	atl-1	-1	9634837	9645478	Different TSS	.		9645630			.		152			.	9645440	15	0	.		190
chrV	WBGene00000228	atn-1	1	12478394	12484433	Different TSS	.				12477312	.				1082	.	12478394	1618	2	.				1082
chrIII	WBGene00000229	atp-2	1	5228370	5230505		.	5228178	5228178	5228178	5228175	.	192	192	192	195	.	5228378	5803	42	.	200	200	200	203
chrI	WBGene00000230	atp-3	-1	5428546	5429911	Different TSS	.	5429904	5429904		5429904	.	-7	-7		-7	.	5429625	4	0	.	279	279		279
chrIII	WBGene00000231	atx-2	1	10461292	10467953	Different TSS	.	10461282	10460902	10461282	10461282	.	10	390	10	10	.	10461531	394	4	.	249	629	249	249
chrI	WBGene00000232	avr-14	-1	5967253	5973322	Same TSS	.				5973656	.				334	.	5973322	32	0	.				334
chrIII	WBGene00000235	baf-1	1	9467373	9467982		.		9467272		9467284	.		101		89	.	9467380	1497	153	.		108		96
chrI	WBGene00000236	bag-1	-1	6563641	6564454		.		6564558			.		104			.	6564452	517	492	.		106
chrX	WBGene00000238	bar-1	-1	7165960	7170582		.				7171070	.				488	.	7170582	88	0	.				488
chrII	WBGene00000240	pah-1	-1	8762613	8765156		.	8765090		8765083	8765083	.	-66		-73	-73	.				.
chrIV	WBGene00000242	bbs-2	1	7934085	7937734		.		7934071			.		14			.				.
chrV	WBGene00000244	bbs-8	-1	6762459	6765055		.		6765023			.		-32			.				.
chrX	WBGene00000245	bca-1	-1	6201873	6204711		.				6204929	.				218	.	6204711	302	39	.				218
chrIV	WBGene00000247	bec-1	-1	5661131	5664416		.		5665449	5666627	5664789	.		1033	2211	373	.	5664414	533	1	.		1035	2213	375
chrIII	WBGene00000248	ben-1	-1	3538280	3541615		.	3542291	3542291		3542291	.	676	676		676	.	3541613	279	0	.	678	678		678
chrV	WBGene00000249	bir-1	1	11644356	11645353		.		11644370		11644370	.		-14		-14	.	11644742	451	3	.		372		372
chrX	WBGene00000262	bra-1	1	13598401	13599605		.	13598188	13598188	13598188	13598188	.	213	213	213	213	.	13598399	471	1	.	211	211	211	211
chrIII	WBGene00000263	F23H11.5	-1	909979	910716		.	910984	910986	910986	910984	.	268	270	270	268	.	910571	17540	50	.	413	415	415	413
chrIII	WBGene00000264	brc-1	-1	3853087	3862940	Different TSS	.		3863058			.		118			.	3862940	103	1	.		118
chrIV	WBGene00000266	bre-1	1	8987115	8990428	Different TSS	.		8986911			.		204			.	8987253	207	0	.		342
chrI	WBGene00000272	bro-1	1	5186946	5188619		.	5186945	5186945			.	1	1			.				.
chrIII	WBGene00000273	brp-1	1	12020448	12025225	Same TSS	.			12018061	12018061	.			2387	2387	.	12020452	6254	8	.			2391	2391
chrII	WBGene00000274	btf-1	1	13200093	13215640		.	13199709				.	384				.	13200095	33	31	.	386
chrI	WBGene00000275	bub-1	1	7251939	7255223		.	7251790	7251790		7251790	.	149	149		149	.	7251939	287	2	.	149	149		149
chrX	WBGene00000281	cah-3	1	16487406	16489323		.			16486075	16487276	.			1331	130	.	16487408	1134	1	.			1333	132
chrX	WBGene00000282	cah-4	1	13542502	13544531	Same TSS	.			13541375	13541375	.			1127	1127	.	13542504	2048	1	.			1129	1129
chrX	WBGene00000283	cah-5	1	7019981	7023926		.				7019678	.				303	.	7019990	441	3	.				312
chrV	WBGene00000285	cal-1	-1	12514857	12515667		.		12518808	12518935	12518997	.		3141	3268	3330	.	12515659	204	1	.		3149	3276	3338
chrII	WBGene00000286	cal-2	1	8960650	8961508		.			8959958	8959916	.			692	734	.	8960652	1041	2	.			694	736
chrII	WBGene00000289	cam-1	-1	9295877	9310242	Different TSS	.		9313309		9310827	.		3067		585	.	9304763	504	0	.		8546		6064
chrIV	WBGene00000292	cap-1	-1	7228326	7230214		.		7230334			.		120			.	7230212	1126	3	.		122
chrII	WBGene00000293	cap-2	1	10869129	10870928		.	10868956	10868956	10868956	10868956	.	173	173	173	173	.	10869136	1686	8	.	180	180	180	180
chrX	WBGene00000294	cas-1	-1	16807385	16813600	Same TSS	.	16815523	16815497			.	1923	1897			.	16813583	914	0	.	1940	1914
chrV	WBGene00000298	cat-4	1	10564855	10566441		.			10564304	10563103	.			551	1752	.	10564857	697	2	.			553	1754
chrIV	WBGene00000301	cav-1	1	9772490	9773454	Different TSS	.	9772342	9772342	9772342	9772342	.	148	148	148	148	.	9772490	14300	34	.	148	148	148	148
chrIII	WBGene00000366	cbp-1	1	9766430	9774721	Same TSS	.	9764792	9764792	9764792	9764802	.	1638	1638	1638	1628	.	9766430	134	0	.	1638	1638	1638	1628
chrX	WBGene00000367	cca-1	-1	7847635	7861258	Same TSS	.				7866538	.				5280	.	7861258	42	0	.				5280
chrI	WBGene00000368	ccb-1	-1	3641708	3647012		.	3648086	3648102		3648093	.	1074	1090		1081	.	3647078	350	1	.	1008	1024		1015
chrIII	WBGene00000369	ccf-1	-1	11918727	11920142		.	11920328	11920328	11920328	11920328	.	186	186	186	186	.	11920137	810	5	.	191	191	191	191
chrIV	WBGene00000370	ccg-1	-1	15270126	15275775		.			15275771	15275771	.			-4	-4	.				.
chrI	WBGene00000371	cco-1	1	9788740	9789956		.	9788724	9788728	9788728	9788728	.	16	12	12	12	.	9789000	5552	33	.	276	272	272	272
chrIV	WBGene00000376	ccr-4	1	12361546	12371804	Different TSS	.	12361359	12361359	12361359	12361359	.	187	187	187	187	.	12361520	739	3	.	161	161	161	161
chrII	WBGene00000377	cct-1	1	8185384	8187551		.	8185229	8185229	8185229	8185229	.	155	155	155	155	.	8185391	1125	16	.	162	162	162	162
chrII	WBGene00000378	cct-2	1	8927675	8929753		.	8927432	8927432	8927432	8927432	.	243	243	243	243	.	8927679	1526	8	.	247	247	247	247
chrII	WBGene00000379	cct-4	1	8283611	8285661		.	8283423	8283423			.	188	188			.	8283618	3947	11	.	195	195
chrIII	WBGene00000381	cct-6	-1	5853488	5855649	Same TSS	.		5855855	5855884	5855855	.		206	235	206	.	5855643	1342	15	.		212	241	212
chrI	WBGene00000382	cdc-6	-1	4268070	4270288		.		4270483			.		195			.	4270288	548	4	.		195
chrII	WBGene00000383	cdc-14	-1	5587606	5593410	Same TSS	.	5593688	5593688	5593639	5593688	.	278	278	229	278	.	5593408	533	3	.	280	280	231	280
chrI	WBGene00000386	cdc-25.1	-1	6469387	6471953		.		6471963			.		10			.	6471924	238	0	.		39
chrV	WBGene00000387	cdc-25.2	1	1577690	1584934		.	1577554	1577554			.	136	136			.	1577691	178	0	.	137	137
chrII	WBGene00000390	cdc-42	1	7616402	7617884		.	7615645	7615645	7615609	7615644	.	757	757	793	758	.	7616404	1132	6	.	759	759	795	760
chrX	WBGene00000391	cdd-1	-1	8208700	8211098		.	8211093		8211093	8211093	.	-5		-5	-5	.	8210745	1093	1	.	348		348	348
chrX	WBGene00000393	cdf-1	-1	6499872	6504576	Same TSS	.	6505104	6505110		6505104	.	528	534		528	.	6504576	71	2	.	528	534		528
chrIII	WBGene00000395	cdh-3	-1	7741208	7754383		.		7754812			.		429			.	7754398	19	0	.		414
chrIII	WBGene00000396	cdh-4	1	4520333	4536957	Different TSS	.	4514213	4515424		4514286	.	6120	4909		6047	.	4520331	59	0	.	6118	4907		6045
chrII	WBGene00000399	cdh-7	1	14843142	14850758		.				14843160	.				-18	.				.
chrX	WBGene00000401	cdh-9	1	16595163	16601969		.		16594982			.		181			.	16595165	31	0	.		183
chrIV	WBGene00000402	cdh-10	-1	2436514	2463368		.				2463421	.				53	.	2463368	47	0	.				53
chrII	WBGene00000403	casy-1	-1	5945381	5956660	Different TSS	.			5958087	5958087	.			1427	1427	.	5956658	823	2	.			1429	1429
chrIII	WBGene00000405	cdk-1	1	9747347	9748767		.	9747321	9747321		9747321	.	26	26		26	.	9747387	962	12	.	66	66		66
chrX	WBGene00000406	cdk-4	-1	13515785	13518834	Different TSS	.	13519000	13519027			.	166	193			.	13518841	60	0	.	159	186
chrIII	WBGene00000407	cdk-5	-1	13464583	13466289		.		13466247			.		-42			.	13466236	1	0	.		11
chrI	WBGene00000408	cdk-7	-1	2281116	2291185		.	2291192	2291192			.	7	7			.	2289755	67	257	.	1437	1437
chrI	WBGene00000409	cdk-8	1	8702472	8705790		.	8702500	8702500		8702500	.	-28	-28		-28	.	8702325	3	0	.	-175	-175		-175
chrII	WBGene00000411	cdl-1	1	10785391	10787206		.	10784972	10784972		10785282	.	419	419		109	.	10785393	1972	5	.	421	421		111
chrV	WBGene00000412	cdr-1	1	15921342	15922801		.				15921341	.				1	.				.
chrI	WBGene00000413	cdt-1	-1	3223164	3228024		.		3228043			.		19			.				.
chrIII	WBGene00000414	cec-1	1	8426266	8428508		.	8425335	8425385	8425385	8425385	.	931	881	881	881	.	8426262	1994	1	.	927	877	877	877
chrIV	WBGene00000416	ced-2	1	1597315	1601620		.		1596052	1596052	1596052	.		1263	1263	1263	.	1597317	416	2	.		1265	1265	1265
chrIV	WBGene00000417	ced-3	-1	13199206	13206272	Different TSS	.	13206023	13206023		13206023	.	-249	-249		-249	.				.
chrIV	WBGene00000419	ced-5	1	10484090	10492932		.		10483935			.		155			.	10484090	116	1	.		155
chrIII	WBGene00000420	ced-6	1	5595730	5598393		.	5594533	5594527	5594527	5594573	.	1197	1203	1203	1157	.	5595730	273	91	.	1197	1203	1203	1157
chrIII	WBGene00000421	ced-7	-1	9570131	9579788	Different TSS	.		9580228			.		440			.	9579996	206	2	.		232
chrIII	WBGene00000425	ced-11	1	9119482	9125073		.		9118706			.		776			.	9119475	78	0	.		769
chrI	WBGene00000431	ceh-6	-1	8498108	8502406		.			8502313		.			-93		.	8502599	16	1	.			-286
chrII	WBGene00000432	ceh-7	-1	8703318	8703779		.	8704522	8704522	8704522	8704522	.	743	743	743	743	.				.
chrI	WBGene00000433	ceh-8	-1	8245716	8250890		.			8250941		.			51		.				.
chrIII	WBGene00000437	ceh-13	1	7555594	7558142		.	7554810	7554810		7554810	.	784	784		784	.	7555594	553	0	.	784	784		784
chrIII	WBGene00000439	ceh-16	1	8622578	8625920		.	8622618	8622598	8622618	8622618	.	-40	-20	-40	-40	.	8622806	59	0	.	188	208	188	188
chrIII	WBGene00000443	ceh-20	1	6979827	6981733		.	6979151	6979151	6979151	6979151	.	676	676	676	676	.	6979829	461	4	.	678	678	678	678
chrIII	WBGene00000448	ceh-26	1	8067224	8071356		.		8065364			.		1860			.	8067224	240	1	.		1860
chrV	WBGene00000449	ceh-27	-1	11661535	11664679	Different TSS	.	11665078	11665078	11665085	11665026	.	399	399	406	347	.	11664680	243	1	.	398	398	405	346
chrX	WBGene00000451	ceh-30	1	3063575	3065541		.	3063601	3063601		3063601	.	-26	-26		-26	.	3063769	2	0	.	168	168		168
chrV	WBGene00000453	ceh-32	-1	11701743	11705383		.	11705503	11705531	11705503	11705531	.	120	148	120	148	.	11705382	508	1	.	121	149	121	149
chrV	WBGene00000455	ceh-34	-1	5315497	5319561		.	5319558	5319558	5319558	5319558	.	-3	-3	-3	-3	.				.
chrX	WBGene00000457	ceh-36	-1	14183380	14185528		.		14186515			.		987			.	14185530	98	0	.		985
chrII	WBGene00000459	ceh-38	1	6951598	6955366	Same TSS	.	6951608	6951637	6951608	6951637	.	-10	-39	-10	-39	.	6951962	525	2	.	354	325	354	325
chrX	WBGene00000460	ceh-39	-1	1854142	1856166		.	1856274	1856278			.	108	112			.	1856166	128	1	.	108	112
chrIII	WBGene00000465	cpg-1	1	4489326	4491365	Same TSS	.				4489230	.				96	.	4489328	7739	31	.				98
chrI	WBGene00000466	cel-1	1	9665246	9668655	Same TSS	.	9665242	9665242	9665242	9665242	.	4	4	4	4	.				.
chrI	WBGene00000468	ces-1	1	8633919	8636038		.	8633916	8633918			.	3	1			.				.
chrI	WBGene00000469	ces-2	1	14961490	14965344		.	14960535	14960535			.	955	955			.	14961492	281	0	.	957	957
chrII	WBGene00000472	cey-1	-1	11039391	11041150		.	11042935	11042935	11042935	11042935	.	1785	1785	1785	1785	.	11041148	3647	11	.	1787	1787	1787	1787
chrI	WBGene00000473	cey-2	1	5619570	5620671		.			5619381	5619386	.			189	184	.	5619572	9811	26	.			191	186
chrI	WBGene00000474	cey-3	-1	5571787	5572976		.				5573030	.				54	.	5572952	5393	21	.				78
chrIII	WBGene00000475	cey-4	-1	10866847	10868628		.	10869008	10869008	10869008	10869008	.	380	380	380	380	.	10868604	13098	37	.	404	404	404	404
chrV	WBGene00000478	cfz-2	-1	3441498	3444874	Same TSS	.	3445691	3445693		3445691	.	817	819		817	.	3444874	201	1	.	817	819		817
chrIII	WBGene00000479	cgh-1	-1	7495639	7497768		.	7498006	7498006	7498006	7498006	.	238	238	238	238	.	7497766	6637	22	.	240	240	240	240
chrV	WBGene00000480	cgp-1	-1	118043	122966		.		122938			.		-28			.	122789	515	259	.		149
chrIV	WBGene00000481	cha-1	-1	3613782	3624692	Different TSS	.			3626500	3627598	.			1808	2906	.	3624692	90	0	.			1808	2906
chrX	WBGene00000482	chd-3	-1	12846360	12852531		.	12853518	12854191	12853509	12853509	.	987	1660	978	978	.	12852531	254	0	.	987	1660	978	978
chrX	WBGene00000484	che-2	1	481379	486505		.	481369	481369			.	10	10			.	481451	11	0	.	82	82
chrI	WBGene00000485	che-3	-1	8062006	8081666		.	8082615				.	949				.	8081672	15	0	.	943
chrV	WBGene00000490	che-11	-1	12144276	12150670		.		12150699			.		29			.				.
chrI	WBGene00000492	che-13	-1	10506989	10515495	Different TSS	.	10515517	10515514			.	22	19			.				.
chrI	WBGene00000493	che-14	1	5746728	5754281		.		5746639		5746639	.		89		89	.				.
chrI	WBGene00000500	chn-1	-1	6181316	6183882		.		6183912			.		30			.	6183858	420	1	.		54
chrIV	WBGene00000501	cho-1	-1	13209705	13214542		.				13219488	.				4946	.	13214542	33	1	.				4946
chrI	WBGene00000502	chp-1	-1	5103583	5104919		.		5104978			.		59			.	5104914	20	240	.		64
chrX	WBGene00000503	cht-1	-1	3397594	3400007		.	3400433	3400433			.	426	426			.	3400003	1628	3	.	430	430
chrIII	WBGene00000506	cic-1	-1	2394319	2401298		.		2401271			.		-27			.	2401205	256	1	.		66
chrIII	WBGene00000507	cit-1.1	-1	8005761	8009758	Different TSS	.	8009867	8009867		8009840	.	109	109		82	.	8009756	165	1	.	111	111		84
chrIII	WBGene00000508	cit-1.2	1	8010713	8013706	Different TSS	.	8009898	8009898	8009932	8009898	.	815	815	781	815	.	8010713	417	2	.	815	815	781	815
chrIV	WBGene00000509	cka-1	-1	9731718	9737602	Different TSS	.				9737611	.				9	.	9733909	605	1	.				3702
chrX	WBGene00000510	cka-2	1	4286713	4291466	Different TSS	.	4286800	4286800		4286800	.	-87	-87		-87	.	4287549	31	0	.	749	749		749
chrV	WBGene00000514	ckb-4	-1	2106397	2109386		.		2109396			.		10			.				.
chrX	WBGene00000515	ckc-1	1	3576593	3578944	Same TSS	.			3576486	3576486	.			107	107	.	3576595	659	1	.			109	109
chrII	WBGene00000516	cki-1	1	7811189	7812052		.	7809317	7809317	7809312	7809317	.	1872	1872	1877	1872	.	7811189	331	1	.	1872	1872	1877	1872
chrII	WBGene00000517	cki-2	1	7816458	7820227	Different TSS	.	7816512	7816512	7816514	7816514	.	-54	-54	-56	-56	.	7816641	128	0	.	129	129	127	127
chrIII	WBGene00000520	cku-80	1	4419820	4423344		.				4419517	.				303	.	4419820	263	1	.				303
chrV	WBGene00000521	cky-1	1	12736686	12741194	Same TSS	.		12736683		12736692	.		3		-6	.				.
chrX	WBGene00000522	clc-1	1	11047349	11049166		.				11047514	.				-165	.	11048170	304	1	.				656
chrX	WBGene00000523	clc-2	1	7431425	7433490		.	7430663				.	762				.	7431427	371	0	.	764
chrII	WBGene00000528	clh-1	-1	11846445	11854680	Same TSS	.			11854805	11854802	.			125	122	.	11854680	321	1	.			125	122
chrII	WBGene00000532	clh-5	-1	9094618	9098784		.	9099082	9099080	9099077	9099080	.	298	296	293	296	.	9098541	650	2	.	541	539	536	539
chrV	WBGene00000534	cpi-2	1	6044043	6045654	Same TSS	.	6044113	6044113	6044113	6044113	.	-70	-70	-70	-70	.	6044045	10719	24	.	-68	-68	-68	-68
chrIV	WBGene00000535	cpi-1	-1	6092587	6093636		.	6093619			6093619	.	-17			-17	.				.
chrV	WBGene00000539	cln-3.1	-1	11263504	11265632	Different TSS	.				11265643	.				11	.				.
chrIII	WBGene00000542	clp-1	1	7981002	7986272	Same TSS	.				7979902	.				1100	.	7981009	1665	4	.				1107
chrIII	WBGene00000545	clp-4	-1	1807725	1818316	Same TSS	.				1819250	.				934	.	1818314	246	0	.				936
chrII	WBGene00000548	clr-1	1	5466344	5473788	Different TSS	.		5461041	5464822	5464134	.		5303	1522	2210	.	5466348	276	0	.		5307	1526	2214
chrIII	WBGene00000549	cls-2	1	9054974	9058804		.	9054075	9054886	9054075	9054073	.	899	88	899	901	.	9054974	870	2	.	899	88	899	901
chrIII	WBGene00000550	clu-1	-1	9516565	9521378		.	9521745	9521763		9521763	.	367	385		385	.	9521376	450	6	.	369	387		387
chrV	WBGene00000552	cmd-1	1	1156270	1157761		.	1154269	1151704	1154269	1154269	.	2001	4566	2001	2001	.	1156272	4432	17	.	2003	4568	2003	2003
chrIV	WBGene00000553	cmk-1	1	1824527	1834028		.		1824443	1824443	1824490	.		84	84	37	.				.
chrV	WBGene00000554	cnb-1	1	11375724	11378039		.	11375504	11375504	11375504	11375504	.	220	220	220	220	.	11375726	3156	1	.	222	222	222	222
chrV	WBGene00000556	cnc-2	-1	1449667	1450189		.				1450188	.				-1	.				.
chrV	WBGene00000557	cnc-3	1	1448031	1448794		.		1448055		1448003	.		-24		28	.				.
chrV	WBGene00000558	cnc-4	1	1447222	1447707		.	1447221		1447221	1447221	.	1		1	1	.				.
chrIII	WBGene00000561	cnd-1	-1	5240554	5242069		.	5242049	5242049			.	-20	-20			.				.
chrIII	WBGene00000564	cnk-1	1	10271166	10278488		.		10270939		10270964	.		227		202	.	10271166	286	0	.		227		202
chrII	WBGene00000565	cnt-1	-1	12072006	12088797	Different TSS	.	12089687	12089687		12089690	.	890	890		893	.	12088802	344	1	.	885	885		888
chrIII	WBGene00000566	cnt-2	1	10655671	10677423	Different TSS	.	10651882	10651882			.	3789	3789			.	10663512	39	0	.	11630	11630
chrIII	WBGene00000567	cnx-1	-1	9814296	9817052		.	9817240	9817240	9817240	9817230	.	188	188	188	178	.	9817050	1013	0	.	190	190	190	180
chrI	WBGene00000583	cof-2	1	6250573	6252823		.	6250198	6250209			.	375	364			.				.
chrX	WBGene00000591	coh-1	-1	7465903	7475249		.		7475048			.		-201			.				.
chrV	WBGene00000599	col-10	-1	9164272	9165284		.	9165281		9165281	9165281	.	-3		-3	-3	.	9165354	5	0	.	-73		-73	-73
chrV	WBGene00000602	col-13	-1	10420867	10421869		.				10421934	.				65	.	10421869	1716	4	.				65
chrIV	WBGene00000603	col-14	1	7753396	7754635	Different TSS	.	7753417	7753417		7753417	.	-21	-21		-21	.	7753506	21	0	.	89	89		89
chrII	WBGene00000606	col-17	-1	4866431	4867569		.				4867767	.				198	.	4867569	4024	5	.				198
chrIV	WBGene00000611	col-34	-1	4243541	4244603		.	4244602	4244602		4244602	.	-1	-1		-1	.				.
chrII	WBGene00000616	col-39	1	10704844	10705961		.			10704843	10704843	.			1	1	.				.
chrX	WBGene00000618	col-41	-1	15174969	15176411		.				15176405	.				-6	.				.
chrI	WBGene00000623	col-46	-1	741882	745457		.				745510	.				53	.	743527	4	0	.				1983
chrI	WBGene00000624	col-47	1	745756	748510		.				745643	.				113	.	745850	17	0	.				207
chrI	WBGene00000625	col-48	1	3010692	3011661		.	3010580			3010580	.	112			112	.	3010692	1178	3	.	112			112
chrI	WBGene00000631	col-54	1	5842717	5844060		.				5842197	.				520	.	5842712	77	0	.				515
chrI	WBGene00000634	col-58	1	6311253	6312415		.				6311252	.				1	.				.
chrI	WBGene00000639	col-63	-1	8243687	8244955		.	8245615	8245615		8245615	.	660	660		660	.				.
chrI	WBGene00000641	col-65	-1	11489148	11490550		.	11490585	11490585		11490585	.	35	35		35	.	11490564	6	0	.	21	21		21
chrII	WBGene00000647	col-71	-1	3500076	3502452		.				3502420	.				-32	.	3502571	18	0	.				-151
chrII	WBGene00000649	col-73	-1	4872093	4873122		.				4873318	.				196	.	4873122	15717	7	.				196
chrII	WBGene00000650	col-74	1	5830848	5831993		.	5830848	5830848			.	0	0			.				.
chrII	WBGene00000655	col-79	1	10703559	10704515		.				10703540	.				19	.				.
chrII	WBGene00000656	col-80	1	10707144	10708227		.			10707143		.			1		.				.
chrIII	WBGene00000665	col-90	1	7948773	7950002		.				7948776	.				-3	.				.
chrIII	WBGene00000667	col-92	-1	10982067	10983154		.				10983148	.				-6	.				.
chrIII	WBGene00000669	col-94	-1	10986727	10987744		.	10987743		10987743	10987743	.	-1		-1	-1	.				.
chrIII	WBGene00000672	col-97	-1	12992301	12993603		.	12994101			12994101	.	498			498	.	12993606	9639	1	.	495			495
chrIII	WBGene00000673	col-98	1	13018834	13020130		.			13018896	13018896	.			-62	-62	.				.
chrIV	WBGene00000674	col-99	-1	138461	147919	Same TSS	.		151303			.		3384			.				.
chrIV	WBGene00000677	col-103	-1	762412	763678		.			763676	763676	.			-2	-2	.				.
chrIV	WBGene00000678	col-104	-1	1353678	1355304		.				1355661	.				357	.	1355302	6658	0	.				359
chrIV	WBGene00000681	col-107	1	1548723	1549717	Same TSS	.	1548722	1548722	1548722	1548722	.	1	1	1	1	.				.
chrIV	WBGene00000683	col-109	-1	1817044	1820252		.				1820392	.				140	.	1820252	9758	4	.				140
chrIV	WBGene00000685	col-111	-1	4655784	4657579		.	4657607	4657607		4657607	.	28	28		28	.	4657583	4	0	.	24	24		24
chrIV	WBGene00000687	col-113	-1	7150653	7152478		.	7152609	7152609		7152609	.	131	131		131	.	7152487	352	0	.	122	122		122
chrIV	WBGene00000695	col-121	-1	9394917	9396201		.		9396379			.		178			.	9396201	72	0	.		178
chrIV	WBGene00000699	col-125	1	11225483	11226497		.				11225483	.				0	.				.
chrIV	WBGene00000702	col-128	-1	11549979	11551938		.				11551937	.				-1	.				.
chrIV	WBGene00000704	col-130	-1	12427482	12428493		.				12428492	.				-1	.				.
chrIV	WBGene00000705	col-131	-1	13065705	13067264		.		13067274		13067274	.		10		10	.				.
chrIV	WBGene00000707	col-133	-1	14098310	14099327		.				14099342	.				15	.				.
chrV	WBGene00000717	col-144	-1	9159619	9160640		.	9160618			9160618	.	-22			-22	.				.
chrV	WBGene00000718	col-145	-1	9162028	9162982		.				9163193	.				211	.				.
chrV	WBGene00000719	col-146	1	9629919	9630987		.				9629921	.				-2	.				.
chrV	WBGene00000720	col-147	-1	9632247	9633313		.			9633312	9633315	.			-1	2	.				.
chrV	WBGene00000722	col-149	-1	10291671	10292843		.				10292838	.				-5	.				.
chrV	WBGene00000723	col-150	-1	10293540	10294596		.			10294595		.			-1		.				.
chrV	WBGene00000726	col-153	1	10949879	10951733		.				10949880	.				-1	.	10949991	9	0	.				111
chrV	WBGene00000727	col-154	1	11385342	11386363		.				11385343	.				-1	.				.
chrV	WBGene00000728	col-155	-1	11388872	11389857		.				11389856	.				-1	.	11389855	4	0	.				1
chrV	WBGene00000729	col-156	-1	11449205	11450339		.				11450338	.				-1	.				.
chrV	WBGene00000733	col-160	-1	13200968	13202175		.				13202174	.				-1	.	13202085	6	0	.				89
chrX	WBGene00000738	col-165	1	4353593	4354786		.	4353596	4353596			.	-3	-3			.				.
chrX	WBGene00000739	col-166	1	6279639	6280983	Different TSS	.			6279795	6279795	.			-156	-156	.	6279980	2381	3	.			185	185
chrX	WBGene00000740	col-167	1	6323261	6324481		.				6323269	.				-8	.	6323452	504	0	.				183
chrX	WBGene00000741	col-168	1	6326155	6327339		.				6326154	.				1	.	6326157	4	0	.				3
chrX	WBGene00000742	col-169	1	6329124	6330091		.				6328990	.				134	.	6329124	1629	5	.				134
chrX	WBGene00000746	col-173	-1	6875127	6877494		.				6877651	.				157	.	6877496	658	1	.				155
chrX	WBGene00000747	col-174	1	7546796	7548320		.				7546840	.				-44	.				.
chrX	WBGene00000749	col-176	1	10077554	10078679		.				10077553	.				1	.				.
chrX	WBGene00000755	col-182	-1	12636085	12636988		.				12637006	.				18	.				.
chrI	WBGene00000761	coq-1	-1	5412845	5415632		.		5416328		5416328	.		696		696	.	5415632	146	32	.		696		696
chrIII	WBGene00000765	coq-5	-1	7857242	7858392		.		7858515			.		123			.	7858390	412	8	.		125
chrIII	WBGene00000768	cor-1	1	10249039	10254619	Same TSS	.	10248958	10248958	10248960	10248966	.	81	81	79	73	.	10249039	84	1	.	81	81	79	73
chrII	WBGene00000773	cpf-1	-1	8600300	8602421		.	8602420	8602420		8602420	.	-1	-1		-1	.				.
chrIII	WBGene00000774	cpf-2	-1	13266839	13268796		.		13268867			.		71			.	13268782	769	2	.		85
chrIV	WBGene00000775	cpin-1	1	9451321	9453355		.	9450697	9450697			.	624	624			.	9451323	61	0	.	626	626
chrV	WBGene00000776	cpl-1	-1	16592550	16595327		.	16595413	16595413	16595413	16595413	.	86	86	86	86	.	16595325	17494	13	.	88	88	88	88
chrII	WBGene00000778	cpn-2	1	337339	339248		.		337369			.		-30			.	337782	573	0	.		413
chrI	WBGene00000779	cpn-3	1	3987894	3988705		.	3987942	3987942	3987942	3987942	.	-48	-48	-48	-48	.				.
chrI	WBGene00000780	cpn-4	-1	10924231	10925746		.	10925904		10925904	10925904	.	158		158	158	.	10925744	1550	21	.	160		160	160
chrV	WBGene00000783	cpr-3	-1	15296817	15298659		.				15298658	.				-1	.				.
chrV	WBGene00000784	cpr-4	1	6614657	6615828		.				6614656	.				1	.				.
chrV	WBGene00000785	cpr-5	-1	1132598	1133994		.				1133970	.				-24	.				.
chrX	WBGene00000786	cpr-6	1	6607166	6609009	Different TSS	.		6607169		6607169	.		-3		-3	.	6606978	12	0	.		-191		-191
chrI	WBGene00000788	cpz-1	-1	2686642	2689475		.	2689444	2689444	2689444	2689444	.	-31	-31	-31	-31	.				.
chrV	WBGene00000789	cpz-2	1	13381176	13383063		.				13381213	.				-37	.				.
chrIII	WBGene00000793	crh-1	1	11657638	11693737	Different TSS	.	11657371	11657371	11657378	11657371	.	267	267	260	267	.	11657638	610	1	.	267	267	260	267
chrV	WBGene00000795	crn-2	1	5594599	5595732		.	5594711				.	-112				.	5594599	53	117	.	-112
chrX	WBGene00000797	crn-4	-1	2255840	2258073		.	2258556	2258564		2258560	.	483	491		487	.	2258093	100	0	.	463	471		467
chrV	WBGene00000802	crt-1	-1	6098976	6100536		.	6100706	6100711	6100706	6100706	.	170	175	170	170	.	6100525	9736	51	.	181	186	181	181
chrX	WBGene00000803	csb-1	-1	15861224	15865843		.		15866206			.		363			.	15865849	50	1	.		357
chrI	WBGene00000812	csk-1	1	71858	81071		.	70201	70173		70173	.	1657	1685		1685	.	71847	270	0	.	1646	1674		1674
chrX	WBGene00000822	csq-1	1	14684806	14688296		.				14684671	.				135	.	14684808	3020	1	.				137
chrI	WBGene00000832	ctn-1	1	2606756	2617363	Same TSS	.				2605577	.				1179	.	2606756	279	0	.				1179
chrIII	WBGene00000833	cts-1	-1	10214723	10216553		.	10216734	10216734	10216734	10216700	.	181	181	181	147	.	10216544	10473	2022	.	190	190	190	156
chrIII	WBGene00000835	cuc-1	-1	7860399	7860937		.	7860966	7861624		7860966	.	29	687		29	.	7860916	2167	11	.	50	708		50
chrIII	WBGene00000836	cul-1	1	10471140	10475121		.	10470802	10470360	10471063	10471055	.	338	780	77	85	.	10471140	308	2	.	338	780	77	85
chrIII	WBGene00000837	cul-2	1	13687098	13692487	Different TSS	.	13686534				.	564				.	13687630	397	2	.	1096
chrV	WBGene00000838	cul-3	1	177422	184873		.	177121	177121	177122	177104	.	301	301	300	318	.	177580	670	16	.	459	459	458	476
chrII	WBGene00000839	cul-4	1	7302060	7305717		.		7301900			.		160			.	7302060	665	3	.		160
chrV	WBGene00000840	cul-5	1	10179509	10183129		.		10178461			.		1048			.	10179509	1264	6	.		1048
chrIV	WBGene00000841	cul-6	-1	12586462	12590404		.				12591120	.				716	.	12590420	35	0	.				700
chrI	WBGene00000843	cup-2	-1	10398975	10400186		.		10400742			.		556			.	10400168	683	5	.		574
chrII	WBGene00000857	cwn-1	-1	130983	133592	Same TSS	.	133976	133969			.	384	377			.	133598	249	1	.	378	371
chrIV	WBGene00000865	cyb-1	1	10735304	10737161		.	10734756	10734757		10734757	.	548	547		547	.	10735422	4620	7	.	666	665		665
chrV	WBGene00000868	cyb-3	1	15395677	15397331	Different TSS	.		15395550		15395550	.		127		127	.	15395688	8539	26	.		138		138
chrI	WBGene00000869	cyc-1	-1	8022680	8024419		.		8024688			.		269			.	8024417	1865	192	.		271
chrIII	WBGene00000875	cyk-4	-1	13768440	13771141		.		13771210			.		69			.	13771123	990	4	.		87
chrV	WBGene00000876	cyl-1	-1	11990991	11993748		.		11993810			.		62			.	11993704	647	2	.		106
chrV	WBGene00000877	cyn-1	1	14356059	14356808		.	14355988	14356006	14355995	14356006	.	71	53	64	53	.	14356061	3898	15	.	73	55	66	55
chrV	WBGene00000879	cyn-3	1	15189908	15190910		.	15189782	15189782	15189782	15189808	.	126	126	126	100	.	15189910	7511	23	.	128	128	128	102
chrII	WBGene00000880	cyn-4	-1	10870718	10872551		.		10872617			.		66			.	10872551	225	1	.		66
chrIII	WBGene00000882	cyn-6	1	773399	774156		.	772914	772914	772914	772914	.	485	485	485	485	.	773410	637	4	.	496	496	496	496
chrV	WBGene00000883	cyn-7	-1	15186565	15187770		.	15187754	15187755	15187755	15187755	.	-16	-15	-15	-15	.	15187361	13182	60	.	393	394	394	394
chrX	WBGene00000884	cyn-8	1	8911240	8914199	Same TSS	.	8911290	8911290	8911290	8911290	.	-50	-50	-50	-50	.				.
chrII	WBGene00000887	cyn-11	-1	8715143	8716233		.		8716463		8716456	.		230		223	.	8716231	485	3	.		232		225
chrI	WBGene00000891	cyn-15	-1	13566086	13572052		.			13572116		.			64		.	13572034	412	2	.			82
chrV	WBGene00000893	cyn-17	1	5799666	5805642	Same TSS	.		5799878			.		-212			.				.
chrII	WBGene00000894	dab-1	1	8226082	8229100	Same TSS	.	8222926	8222926	8226124	8226131	.	3156	3156	-42	-49	.	8226266	1573	13	.	3340	3340	142	135
chrIII	WBGene00000895	dac-1	1	816240	821723	Different TSS	.				816192	.				48	.				.
chrI	WBGene00000896	dad-1	-1	6553480	6554293		.	6554590	6554590	6554590	6554590	.	297	297	297	297	.	6554291	4067	13	.	299	299	299	299
chrIII	WBGene00000898	daf-2	-1	2995755	3028792	Same TSS	.				3029942	.				1150	.	3028792	556	2	.				1150
chrX	WBGene00000899	daf-3	-1	817926	825474	Different TSS	.	829334	829310		827573	.	3860	3836		2099	.	825472	166	0	.	3862	3838		2101
chrIII	WBGene00000900	daf-4	1	5624972	5632277	Different TSS	.		5621477	5622831	5621477	.		3495	2141	3495	.	5625100	366	2	.		3623	2269	3623
chrII	WBGene00000901	daf-5	-1	14033159	14037647		.	14042873	14042873	14042873	14040225	.	5226	5226	5226	2578	.	14037647	592	0	.	5226	5226	5226	2578
chrX	WBGene00000902	daf-6	1	14888418	14894257		.	14888334				.	84				.	14888419	57	0	.	85
chrIII	WBGene00000903	daf-7	1	811822	813758		.			811824	811824	.			-2	-2	.				.
chrI	WBGene00000904	daf-8	-1	8584536	8587501		.	8590676	8590676			.	3175	3175			.	8587499	56	0	.	3177	3177
chrX	WBGene00000905	daf-9	1	6196892	6200783	Different TSS	.				6196879	.				13	.				.
chrX	WBGene00000908	daf-12	1	10644344	10666806	Different TSS	.				10638014	.				6330	.	10659277	132	0	.				21263
chrIV	WBGene00000911	daf-15	1	9386191	9394905	Same TSS	.	9386264	9386264		9386264	.	-73	-73		-73	.	9386440	257	3	.	176	176		176
chrIV	WBGene00000913	daf-18	-1	419987	425173		.		425719	425720	425692	.		546	547	519	.	425174	623	1	.		545	546	518
chrII	WBGene00000914	daf-19	-1	10157478	10169262	Different TSS	.	10169465	10169465	10169465	10169228	.	203	203	203	-34	.	10169287	9	1	.	178	178	178	-59
chrII	WBGene00000928	dao-2	1	4562850	4563543		.	4562854	4562854		4562854	.	-4	-4		-4	.	4562947	10960	15	.	93	93		93
chrX	WBGene00000929	dao-3	-1	8084159	8086501		.				8086751	.				250	.	8086501	577	0	.				250
chrI	WBGene00000931	dao-5	-1	10187505	10190886	Same TSS	.		10190993		10190999	.		107		113	.	10190886	369	3	.		107		113
chrII	WBGene00000935	daz-1	1	5456288	5458599		.				5456120	.				168	.	5456288	1178	15	.				168
chrV	WBGene00000936	dbl-1	1	6758118	6760392		.			6751996	6751996	.			6122	6122	.	6758118	106	0	.			6122	6122
chrI	WBGene00000938	dcp-66	-1	7537724	7542153	Same TSS	.	7543504	7543501	7548321	7548121	.	1351	1348	6168	5968	.	7542153	562	3	.	1351	1348	6168	5968
chrIII	WBGene00000939	dcr-1	-1	8071850	8080208		.		8080289			.		81			.	8080215	104	2	.		74
chrIV	WBGene00000942	deb-1	-1	7085207	7094353	Different TSS	.		7095431			.		1078			.	7094353	334	0	.		1078
chrV	WBGene00000955	des-2	-1	11415324	11420274		.				11422025	.				1751	.	11420275	87	0	.				1750
chrX	WBGene00000959	dgk-2	-1	4494888	4504581	Different TSS	.	4504487	4504470	4504363	4504468	.	-94	-111	-218	-113	.	4497343	410	0	.	7144	7127	7020	7125
chrI	WBGene00000963	dhp-1	-1	7238996	7243965		.			7243861	7243815	.			-104	-150	.	7243761	55	1	.			100	54
chrII	WBGene00000969	dhs-5	1	5453830	5455959		.		5453868		5453868	.		-38		-38	.	5453830	282	0	.		-38		-38
chrII	WBGene00000970	dhs-6	-1	5617107	5619305		.		5619409			.		104			.	5619301	147	125	.		108
chrII	WBGene00000972	dhs-8	1	14497951	14499611		.	14496931	14496931	14496931	14496931	.	1020	1020	1020	1020	.				.
chrIII	WBGene00000973	dhs-9	-1	5364473	5368008		.	5368339	5368339	5368335	5368339	.	331	331	327	331	.	5368006	677	26	.	333	333	329	333
chrV	WBGene00000977	dhs-14	-1	2763962	2765223		.			2765209	2765209	.			-14	-14	.				.
chrV	WBGene00000979	dhs-16	1	5983728	5985494		.		5981613		5981832	.		2115		1896	.	5983728	47	0	.		2115		1896
chrV	WBGene00000981	dhs-18	-1	11045678	11046877		.				11046842	.				-35	.	11046815	5	0	.				27
chrV	WBGene00000982	dhs-19	-1	11489031	11490343		.	11490435	11490429		11490421	.	92	86		78	.	11490310	219	1	.	125	119		111
chrV	WBGene00000984	dhs-21	-1	12731755	12733610		.	12733586	12733586		12733586	.	-24	-24		-24	.				.
chrX	WBGene00000988	dhs-25	1	1486497	1489324		.	1486531	1486531	1486531	1486531	.	-34	-34	-34	-34	.				.
chrX	WBGene00000990	dhs-27	-1	3412870	3414693		.	3414872	3414819		3414872	.	179	126		179	.				.
chrX	WBGene00000991	dhs-28	1	6818399	6820034		.	6818301	6818301	6818301	6818301	.	98	98	98	98	.	6818399	1435	6	.	98	98	98	98
chrIV	WBGene00000994	dic-1	1	8692086	8696443	Same TSS	.	8691726	8691726	8691726	8691731	.	360	360	360	355	.	8692075	102	1	.	349	349	349	344
chrII	WBGene00000995	die-1	-1	10061486	10074384		.	10074846	10074850			.	462	466			.	10074382	82	0	.	464	468
chrIV	WBGene00000996	dif-1	-1	7551539	7552997		.	7553319	7553319		7553319	.	322	322		322	.	7552863	881	174	.	456	456		456
chrIII	WBGene00000998	dig-1	1	6746253	6794709	Different TSS	.		6742784			.		3469			.	6746253	66	0	.		3469
chrIV	WBGene00001001	dis-3	1	10097187	10106535		.	10097113	10097114		10097086	.	74	73		101	.	10097185	371	0	.	72	71		99
chrIII	WBGene00001002	div-1	-1	10244958	10248814		.		10248811			.		-3			.				.
chrIII	WBGene00001005	dlc-1	-1	6462853	6463749		.	6464251	6464251	6464268	6464268	.	502	502	519	519	.	6463727	38444	74	.	524	524	541	541
chrX	WBGene00001006	dlg-1	1	5479666	5484904	Different TSS	.	5475654	5475472	5476188	5475498	.	4012	4194	3478	4168	.	5479668	758	4	.	4014	4196	3480	4170
chrIV	WBGene00001007	dli-1	-1	13096959	13098789	Same TSS	.	13098782	13098778	13098782	13098782	.	-7	-11	-7	-7	.	13098709	67	1	.	73	69	73	73
chrI	WBGene00001008	dlk-1	-1	12565789	12572791	Different TSS	.	12575799	12575805	12575710	12575710	.	3008	3014	2919	2919	.	12572791	426	0	.	3008	3014	2919	2919
chrIV	WBGene00001017	dnc-1	-1	10926253	10933139	Different TSS	.	10933199	10933226	10933225	10933221	.	60	87	86	82	.	10933137	195	6	.	62	89	88	84
chrIII	WBGene00001018	dnc-2	-1	5924346	5925709		.		5925851			.		142			.	5925709	712	1	.		142
chrIV	WBGene00001019	dnj-1	1	11298986	11304765		.	11298702	11298702	11298702	11298702	.	284	284	284	284	.	11299014	789	0	.	312	312	312	312
chrII	WBGene00001023	dnj-5	-1	6853426	6858255	Same TSS	.	6858930	6858930	6858930	6858930	.	675	675	675	675	.	6858245	2227	7	.	685	685	685	685
chrX	WBGene00001025	dnj-7	1	7194521	7198236		.		7194243		7194243	.		278		278	.	7194521	856	2	.		278		278
chrII	WBGene00001027	dnj-9	1	4852052	4857706		.		4851880			.		172			.	4852052	473	0	.		172
chrI	WBGene00001030	dnj-12	1	14756847	14758780		.	14756836	14756836	14756836	14756873	.	11	11	11	-26	.	14757052	1280	3	.	216	216	216	179
chrII	WBGene00001031	dnj-13	1	11545637	11547302		.	11545497	11545497	11545497	11545497	.	140	140	140	140	.	11545637	442	3	.	140	140	140	140
chrX	WBGene00001032	dnj-14	-1	4709838	4711715	Same TSS	.	4711959	4711959	4711959	4711959	.	244	244	244	244	.	4711713	268	1	.	246	246	246	246
chrIV	WBGene00001033	dnj-15	1	4176379	4178354		.	4176540				.	-161				.	4176381	62	265	.	-159
chrV	WBGene00001037	dnj-19	-1	5503017	5504840		.	5505161	5505167	5505177	5505162	.	321	327	337	322	.	5504834	1230	20	.	327	333	343	328
chrII	WBGene00001038	dnj-20	-1	9618263	9624117	Different TSS	.	9624214	9624214			.	97	97			.	9619184	847	1	.	5030	5030
chrV	WBGene00001040	dnj-22	-1	8461009	8462173		.		8462182			.		9			.	8462093	328	4	.		89
chrII	WBGene00001041	dnj-23	-1	9107319	9108502		.		9108567	9108572	9108572	.		65	70	70	.	9108496	302	4	.		71	76	76
chrIII	WBGene00001042	dnj-24	-1	5416096	5419526		.	5426222	5426222		5421575	.	6696	6696		2049	.	5419526	251	0	.	6696	6696		2049
chrV	WBGene00001043	dnj-25	-1	20729917	20744309	Different TSS	.		20744387			.		78			.	20744308	244	1	.		79
chrV	WBGene00001053	dop-2	1	9608538	9614918	Same TSS	.			9607453	9607424	.			1085	1114	.	9608538	31	0	.			1085	1114
chrI	WBGene00001056	dpf-3	1	6838353	6843342	Same TSS	.		6838294			.		59			.	6838420	517	277	.		126
chrII	WBGene00001061	dpl-1	1	9169847	9172502		.	9169614	9169614		9169641	.	233	233		206	.	9169849	1383	5	.	235	235		208
chrIII	WBGene00001063	dpy-1	-1	2034967	2047997	Different TSS	.		2049116			.		1119			.				.
chrII	WBGene00001064	dpy-2	1	6714256	6715961		.	6714114	6714107		6713843	.	142	149		413	.	6714256	289	0	.	142	149		413
chrX	WBGene00001065	dpy-3	-1	2144596	2145641		.	2145731	2145731		2145730	.	90	90		89	.	2145641	993	1	.	90	90		89
chrIV	WBGene00001066	dpy-4	-1	14985511	14986750		.				14986748	.				-2	.				.
chrI	WBGene00001067	dpy-5	-1	5432161	5433059		.				5433144	.				85	.	5433057	4076	8	.				87
chrX	WBGene00001068	dpy-6	-1	8450325	8455587		.				8455882	.				295	.	8455587	21	0	.				295
chrX	WBGene00001070	dpy-8	-1	5148647	5150445		.				5150444	.				-1	.				.
chrIV	WBGene00001071	dpy-9	-1	257382	259211		.				259281	.				70	.	259204	463	1	.				77
chrII	WBGene00001072	dpy-10	-1	6710116	6712898	Different TSS	.				6713907	.				1009	.	6712193	254	1	.				1714
chrIV	WBGene00001074	dpy-13	1	4235607	4236699		.				4235609	.				-2	.				.
chrI	WBGene00001075	dpy-14	1	6843594	6845135		.	6843597	6843597			.	-3	-3			.				.
chrIII	WBGene00001076	dpy-17	1	5107289	5108550		.	5107146	5107146		5107145	.	143	143		144	.	5107291	1919	5	.	145	145		146
chrIII	WBGene00001077	dpy-18	-1	11372781	11377880		.	11380594	11380590		11380590	.	2714	2710		2710	.	11377880	449	3	.	2714	2710		2710
chrIII	WBGene00001078	dpy-19	-1	8659793	8667394		.	8668764	8668764		8668764	.	1370	1370		1370	.	8667401	109	1	.	1363	1363		1363
chrIV	WBGene00001079	dpy-20	-1	11696758	11699867		.				11699854	.				-13	.	11700399	12	0	.				-545
chrV	WBGene00001080	dpy-21	-1	17936734	17949002		.	17951293	17951240	17951281	17951240	.	2291	2238	2279	2238	.	17949156	322	32	.	2137	2084	2125	2084
chrX	WBGene00001081	dpy-22	-1	9810173	9822215		.	9822608	9822621		9822652	.	393	406		437	.	9822213	121	1	.	395	408		439
chrX	WBGene00001082	dpy-23	1	4389340	4393770	Same TSS	.	4389185	4389185	4389185	4389185	.	155	155	155	155	.	4389340	359	1	.	155	155	155	155
chrIV	WBGene00001085	dpy-26	-1	12445959	12451271		.		12451349			.		78			.	12451271	541	79	.		78
chrIII	WBGene00001086	dpy-27	-1	3813535	3819661		.	3820238	3820252		3820252	.	577	591		591	.	3819661	195	2	.	577	591		591
chrIII	WBGene00001087	dpy-28	1	10763048	10777243		.	10763029				.	19				.	10763032	52	454	.	3
chrV	WBGene00001088	dpy-30	1	12191296	12192192		.	12191182	12191174	12191187	12191174	.	114	122	109	122	.	12191500	1919	19	.	318	326	313	326
chrV	WBGene00001089	dre-1	-1	6533598	6538045		.	6541805	6538457	6541805	6541668	.	3760	412	3760	3623	.	6538045	874	1	.	3760	412	3760	3623
chrIV	WBGene00001093	drp-1	1	5538481	5541356	Same TSS	.	5538035	5538035	5538035	5538035	.	446	446	446	446	.	5538481	739	0	.	446	446	446	446
chrIII	WBGene00001094	dars-1	-1	9489078	9491152		.		9491217	9491217	9491217	.		65	65	65	.	9491131	993	6	.		86	86	86
chrIV	WBGene00001099	dsc-4	-1	315053	320576		.		320562		320562	.		-14		-14	.				.
chrII	WBGene00001101	dsh-1	-1	5214430	5225361	Different TSS	.	5227867	5227867		5227867	.	2506	2506		2506	.	5225365	318	2	.	2502	2502		2502
chrII	WBGene00001102	dsh-2	-1	5078202	5081153		.	5081309	5081309		5081309	.	156	156		156	.	5081159	294	10	.	150	150		150
chrIV	WBGene00001103	dsl-1	-1	1207255	1208068		.		1208096			.		28			.				.
chrIV	WBGene00001104	dsl-2	-1	1202647	1204970		.	1204973	1206399			.	3	1429			.				.
chrIV	WBGene00001105	dsl-3	1	1610418	1612914		.		1610409			.		9			.				.
chrIV	WBGene00001113	dur-1	-1	9921984	9928202	Different TSS	.				9929549	.				1347	.	9928202	567	1	.				1347
chrI	WBGene00001115	dyb-1	1	1483085	1491282		.	1481833	1481833		1481833	.	1252	1252		1252	.	1483085	147	2	.	1252	1252		1252
chrX	WBGene00001116	dyc-1	1	14049466	14063806	Different TSS	.		14039966			.		9500			.	14049466	59	0	.		9500
chrI	WBGene00001117	dyf-1	-1	4989556	4994662	Different TSS	.		4994670			.		8			.	4993507	5	0	.		1163
chrIV	WBGene00001119	dyf-3	-1	3396578	3399120	Different TSS	.		3399154			.		34			.				.
chrI	WBGene00001121	dyf-5	1	9359065	9364172	Same TSS	.	9358916	9358916			.	149	149			.	9359067	28	0	.	151	151
chrX	WBGene00001127	dyf-11	1	763768	766732		.		763631			.		137			.	763758	49	0	.		127
chrX	WBGene00001130	dyn-1	1	15568848	15573625	Same TSS	.	15566800	15566804	15568588	15568588	.	2048	2044	260	260	.	15568822	341	0	.	2022	2018	234	234
chrIV	WBGene00001132	alp-1	1	8852485	8862474	Different TSS	.	8851126	8851056		8851135	.	1359	1429		1350	.	8852487	275	0	.	1361	1431		1352
chrIII	WBGene00001135	eat-4	1	9136839	9141745		.				9133819	.				3020	.	9136834	75	0	.				3015
chrV	WBGene00001137	eat-6	-1	13126392	13129982		.	13130589	13130589	13130589	13130589	.	607	607	607	607	.	13129980	4228	10	.	609	609	609	609
chrI	WBGene00001145	eat-16	1	9722541	9725602	Same TSS	.	9722574	9722574		9722574	.	-33	-33		-33	.	9722712	186	0	.	138	138		138
chrX	WBGene00001148	eat-20	1	15516587	15523932	Same TSS	.		15511963			.		4624			.	15516587	390	1	.		4624
chrX	WBGene00001149	bcat-1	1	12877410	12880255		.	12876919		12876919	12876919	.	491		491	491	.	12877410	2371	3	.	491		491	491
chrV	WBGene00001152	ech-3	1	8022274	8023288		.		8022281			.		-7			.	8022200	3	0	.		-81
chrII	WBGene00001153	ech-4	1	10820970	10822635		.		10820179			.		791			.	10820972	1701	3	.		793
chrIV	WBGene00001154	ech-5	1	797023	799320		.		796916			.		107			.	797023	851	3	.		107
chrIII	WBGene00001155	ech-6	-1	9751355	9752837		.		9752883		9752883	.		46		46	.	9752798	2489	352	.		85		85
chrII	WBGene00001159	eff-1	1	8346644	8350499	Same TSS	.				8342395	.				4249	.	8346640	62	0	.				4245
chrIII	WBGene00001160	efk-1	-1	6164867	6168502	Same TSS	.	6170159	6170160	6170159	6170159	.	1657	1658	1657	1657	.	6168495	216	163	.	1664	1665	1664	1664
chrV	WBGene00001161	efl-1	-1	16958566	16965657		.	16965781	16965782	16965784	16965782	.	124	125	127	125	.	16965651	456	2	.	130	131	133	131
chrIV	WBGene00001163	efn-2	1	10576330	10578266		.	10575460	10575460	10574650	10572238	.	870	870	1680	4092	.	10576330	453	0	.	870	870	1680	4092
chrIII	WBGene00001166	eftu-2	1	6009513	6012790		.		6009265		6009265	.		248		248	.	6009513	2376	5	.		248		248
chrI	WBGene00001167	eef-2	1	9163524	9166945	Different TSS	.	9163569	9163569	9163569	9163569	.	-45	-45	-45	-45	.				.
chrIII	WBGene00001168	eef-1A.1	-1	6969971	6971948		.	6971991	6971997	6971991	6971973	.	43	49	43	25	.	6971657	51003	338	.	334	340	334	316
chrX	WBGene00001169	eef-1A.2	1	7823601	7825718	Different TSS	.	7823396	7823396	7823396	7823396	.	205	205	205	205	.	7823603	7756	23	.	207	207	207	207
chrV	WBGene00001170	egl-1	-1	14431295	14432344		.	14432343	14432343	14432343		.	-1	-1	-1		.				.
chrV	WBGene00001172	egl-3	-1	10169151	10173729	Different TSS	.			10174567	10174567	.			838	838	.	10173727	2268	2	.			840	840
chrIII	WBGene00001174	egl-5	1	7814317	7816386	Same TSS	.	7812392	7812392		7812392	.	1925	1925		1925	.	7814317	114	0	.	1925	1925		1925
chrV	WBGene00001178	egl-9	1	10468388	10476929	Different TSS	.	10466911	10466914	10467216	10466837	.	1477	1474	1172	1551	.	10468494	376	0	.	1583	1580	1278	1657
chrV	WBGene00001179	egl-10	-1	12454502	12462989	Same TSS	.	12463146	12463145		12463145	.	157	156		156	.	12462989	166	1	.	157	156		156
chrX	WBGene00001182	egl-13	1	5663802	5674025	Different TSS	.				5659815	.				3987	.	5663802	105	0	.				3987
chrX	WBGene00001184	egl-15	1	11016344	11023329	Same TSS	.			11014560	11014869	.			1784	1475	.	11016344	92	0	.			1784	1475
chrIV	WBGene00001187	egl-19	1	7405449	7418722	Same TSS	.	7401094	7402431	7401027	7401027	.	4355	3018	4422	4422	.	7405449	235	1	.	4355	3018	4422	4422
chrIV	WBGene00001189	egl-21	-1	10478422	10481824		.	10481754	10481754	10481754	10481754	.	-70	-70	-70	-70	.	10481824	107	0	.	-70	-70	-70	-70
chrII	WBGene00001193	egl-26	1	69660	71279		.	66663	66663	66663	66663	.	2997	2997	2997	2997	.	69654	341	2	.	2991	2991	2991	2991
chrII	WBGene00001194	egl-27	1	6835038	6847865	Different TSS	.	6832010	6832986	6834002	6834785	.	3028	2052	1036	253	.	6845319	572	2	.	13309	12333	11317	10534
chrI	WBGene00001196	egl-30	1	1835681	1841193	Different TSS	.	1835745	1835745	1835745	1835745	.	-64	-64	-64	-64	.				.
chrII	WBGene00001207	egl-43	1	9955127	9962186	Different TSS	.		9954499		9954481	.		628		646	.	9955126	51	0	.		627		645
chrII	WBGene00001208	egl-44	1	5933469	5940777	Different TSS	.	5933371	5933371	5931374	5931408	.	98	98	2095	2061	.	5936417	362	0	.	3046	3046	5043	5009
chrIII	WBGene00001209	egl-45	-1	7824311	7828562		.		7829015			.		453			.	7828560	1195	5	.		455
chrV	WBGene00001210	egl-46	-1	6679312	6681558		.	6681661	6681661	6681667	6681661	.	103	103	109	103	.	6681556	134	0	.	105	105	111	105
chrI	WBGene00001215	ego-2	-1	11400603	11416411	Same TSS	.	11416705	11416704	11416704	11416704	.	294	293	293	293	.	11416418	293	0	.	287	286	286	286
chrIV	WBGene00001223	ehn-3	-1	5416897	5419186	Different TSS	.		5419234			.		48			.				.
chrII	WBGene00001224	ehs-1	1	5820689	5824064	Same TSS	.		5820213			.		476			.	5820691	280	0	.		478
chrII	WBGene00001225	eif-3.B	1	14795328	14798158	Same TSS	.		14795168		14795168	.		160		160	.	14795328	507	0	.		160		160
chrI	WBGene00001226	eif-3.C	-1	9976420	9979659		.	9979827	9979828		9979828	.	168	169		169	.	9979652	600	5	.	175	176		176
chrIII	WBGene00001227	eif-3.D	-1	8969560	8971503		.		8971701		8971701	.		198		198	.	8971501	572	9	.		200		200
chrI	WBGene00001228	eif-3.E	-1	10640382	10642272		.		10642387			.		115			.	10642270	2495	6	.		117
chrII	WBGene00001230	eif-3.G	1	8442714	8444188		.	8442415	8442415	8442406	8442415	.	299	299	308	299	.	8442716	1995	17	.	301	301	310	301
chrI	WBGene00001232	eif-3.I	1	2485870	2489775		.		2485700			.		170			.	2485869	1150	8	.		169
chrIII	WBGene00001235	elb-1	-1	11718736	11719352		.		11719437			.		85			.	11719350	4030	6	.		87
chrIV	WBGene00001239	elo-1	1	9526342	9528335		.			9526237	9526237	.			105	105	.	9526349	1531	10	.			112	112
chrIV	WBGene00001240	elo-2	-1	17466023	17467378		.				17468161	.				783	.	17467371	3465	2	.				790
chrIV	WBGene00001241	elo-3	1	7237717	7239885	Same TSS	.	7235546	7235709		7235546	.	2171	2008		2171	.	7237713	818	5	.	2167	2004		2167
chrIV	WBGene00001243	elo-5	-1	5374590	5377267		.			5377105	5377105	.			-162	-162	.				.
chrIV	WBGene00001244	elo-6	-1	5386619	5388553		.	5388738	5388738	5388738	5388738	.	185	185	185	185	.	5388551	14138	21	.	187	187	187	187
chrII	WBGene00001247	elo-9	-1	14959300	14964034		.	14966122	14966122			.	2088	2088			.	14964032	601	0	.	2090	2090
chrX	WBGene00001250	elt-2	1	10481177	10483520		.				10480680	.				497	.	10481179	270	0	.				499
chrIV	WBGene00001253	elt-6	1	1917854	1921640		.		1917861			.		-7			.	1917977	131	4	.		116
chrV	WBGene00001258	emb-4	-1	18860259	18894947	Different TSS	.		18895114		18895094	.		167		147	.	18894945	256	2	.		169		149
chrIII	WBGene00001259	emb-5	-1	4715256	4720635		.	4720922	4720916	4720922	4720922	.	287	281	287	287	.	4720633	659	4	.	289	283	289	289
chrIII	WBGene00001262	emb-8	-1	5196639	5199649		.			5200499	5200487	.			850	838	.	5199638	435	96	.			861	849
chrIII	WBGene00001263	emb-9	-1	9336794	9344363	Same TSS	.		9346749			.		2386			.	9344363	1069	4	.		2386
chrII	WBGene00001281	emb-27	-1	8159777	8162120		.		8162343			.		223			.	8162118	739	1	.		225
chrV	WBGene00001303	emo-1	-1	10896637	10897126		.	10897277	10897291	10897277	10897277	.	151	165	151	151	.	10897124	17111	65	.	153	167	153	153
chrIV	WBGene00001320	ent-1	-1	11653395	11655447	Different TSS	.		11656263			.		816			.	11655447	403	3	.		816
chrX	WBGene00001325	eor-2	1	14602997	14608590	Same TSS	.	14602898	14602843	14602886	14602898	.	99	154	111	99	.	14602997	139	0	.	99	154	111	99
chrIV	WBGene00001328	epi-1	1	10666807	10679421	Same TSS	.	10665876	10665876			.	931	931			.	10666807	122	0	.	931	931
chrX	WBGene00001329	epn-1	-1	14815915	14818438	Same TSS	.	14818747	14818747	14818724	14819382	.	309	309	286	944	.	14818438	843	8	.	309	309	286	944
chrIV	WBGene00001330	eps-8	1	14879458	14900621	Different TSS	.	14872543	14872543		14872543	.	6915	6915		6915	.	14885541	218	1	.	12998	12998		12998
chrX	WBGene00001331	erd-2	-1	10156799	10160379		.				10160249	.				-130	.				.
chrI	WBGene00001333	erm-1	-1	5284060	5291608	Different TSS	.		5296469		5296467	.		4861		4859	.	5291607	1324	232	.		4862		4860
chrI	WBGene00001334	ero-1	1	14664438	14674811	Different TSS	.		14663436			.		1002			.	14664438	562	36	.		1002
chrX	WBGene00001335	erp-1	-1	3800025	3802751	Same TSS	.	3802856	3803447		3802856	.	105	696		105	.	3802753	157	1	.	103	694		103
chrIV	WBGene00001338	ears-2	-1	388711	390439		.	390423	390423			.	-16	-16			.				.
chrII	WBGene00001340	etr-1	1	162374	170628	Different TSS	.	159598	159598	161044	159598	.	2776	2776	1330	2776	.	163086	1330	1	.	3488	3488	2042	3488
chrV	WBGene00001345	fos-1	1	6003584	6016070	Different TSS	.	6000668	6000661	6000673	6000661	.	2916	2923	2911	2923	.	6003584	560	1	.	2916	2923	2911	2923
chrII	WBGene00001368	exc-7	1	9575912	9581045		.	9576073	9576076	9576076	9576076	.	-161	-164	-164	-164	.	9575912	308	0	.	-161	-164	-164	-164
chrV	WBGene00001374	exp-2	1	6139819	6143531	Different TSS	.				6135210	.				4609	.	6141454	42	0	.				6244
chrI	WBGene00001377	eya-1	-1	14220727	14231331	Different TSS	.		14231330			.		-1			.	14227210	1	0	.		4120
chrIII	WBGene00001385	far-1	-1	9080290	9081108	Different TSS	.	9081191	9081191	9081191	9081191	.	83	83	83	83	.	9081102	17848	81	.	89	89	89	89
chrIII	WBGene00001386	far-2	1	9081602	9082813		.		9081369		9081601	.		233		1	.	9081751	118488	152	.		382		150
chrV	WBGene00001387	far-3	-1	12996803	12997509		.	12997506	12997506		12997506	.	-3	-3		-3	.				.
chrV	WBGene00001389	far-5	1	12995586	12996821	Same TSS	.				12995582	.				4	.				.
chrIV	WBGene00001390	far-6	1	13328335	13329295		.			13328047	13328047	.			288	288	.	13328335	4755	2	.			288	288
chrIV	WBGene00001394	fat-2	1	13323826	13326370		.				13322798	.				1028	.	13323834	7696	4	.				1036
chrIV	WBGene00001395	fat-3	1	9803006	9806101	Different TSS	.				9803016	.				-10	.				.
chrV	WBGene00001397	fat-5	1	17723754	17726799		.				17723919	.				-165	.	17724978	1140	1	.				1059
chrI	WBGene00001404	fbp-1	-1	2580937	2586128		.		2586255	2586242		.		127	114		.	2586126	4515	16	.		129	116
chrV	WBGene00001406	fce-2	1	20425270	20431306		.		20425016		20425002	.		254		268	.	20425270	154	0	.		254		268
chrIV	WBGene00001411	fem-1	-1	5533131	5537921	Same TSS	.		5537920	5537920	5537920	.		-1	-1	-1	.	5537962	2	0	.		-42	-42	-42
chrIII	WBGene00001412	fem-2	-1	632021	634623		.		634725			.		102			.	634623	258	1	.		102
chrV	WBGene00001423	fib-1	-1	15000634	15002178		.	15002218	15002218		15002212	.	40	40		34	.	15001952	1797	5	.	266	266		260
chrIV	WBGene00001426	fkb-1	1	11036527	11038145	Different TSS	.	11036439	11036439	11036439	11036439	.	88	88	88	88	.	11036561	6058	13	.	122	122	122	122
chrI	WBGene00001427	fkb-2	1	12918709	12919282		.	12918309	12918309	12918309	12918309	.	400	400	400	400	.	12918711	9446	65	.	402	402	402	402
chrV	WBGene00001428	fkb-3	1	7225351	7226296		.	7225182	7225182		7225182	.	169	169		169	.	7225327	1094	3	.	145	145		145
chrV	WBGene00001429	fkb-4	-1	12785136	12787087		.	12787083	12787083		12787083	.	-4	-4		-4	.				.
chrI	WBGene00001430	fkb-5	-1	3898049	3899909	Different TSS	.	3899789	3899776		3899776	.	-120	-133		-133	.	3899348	795	2	.	441	428		428
chrV	WBGene00001431	fkb-6	1	20846127	20847706		.	20845701	20845701	20845696	20845701	.	426	426	431	426	.	20846127	1649	13	.	426	426	431	426
chrI	WBGene00001432	fkb-7	1	10667944	10671005		.	10667926	10667887			.	18	57			.				.
chrX	WBGene00001434	fkh-2	-1	3740194	3742309	Different TSS	.	3742283	3742283			.	-26	-26			.	3741374	18	0	.	909	909
chrIV	WBGene00001439	fkh-7	1	5584651	5610353	Different TSS	.			5582624	5582624	.			2027	2027	.	5601640	935	0	.			19016	19016
chrII	WBGene00001440	fkh-8	-1	6189551	6191373	Same TSS	.	6191459		6191459		.	86		86		.	6191362	112	0	.	97		97
chrIII	WBGene00001443	fli-1	-1	8675441	8683612		.	8684437	8684437		8684437	.	825	825		825	.	8683642	152	0	.	795	795		795
chrIV	WBGene00001444	flp-1	1	9144678	9146105	Same TSS	.		9144690	9144690	9144690	.		-12	-12	-12	.				.
chrX	WBGene00001446	flp-3	-1	10092049	10092905		.				10093159	.				254	.	10092905	354	0	.				254
chrX	WBGene00001448	flp-5	1	8528197	8531023		.			8528255	8528255	.			-58	-58	.	8528073	1	0	.			-182	-182
chrV	WBGene00001449	flp-6	1	9471949	9473784		.				9471529	.				420	.	9471951	884	0	.				422
chrX	WBGene00001450	flp-7	1	5885830	5886798		.			5885523	5885523	.			307	307	.	5885830	458	0	.			307	307
chrX	WBGene00001451	flp-8	1	14881350	14882231	Same TSS	.			14881452	14881452	.			-102	-102	.	14881350	4	0	.			-102	-102
chrIV	WBGene00001452	flp-9	-1	12754535	12757650		.			12757567	12757567	.			-83	-83	.	12757542	29	0	.			25	25
chrIV	WBGene00001453	flp-10	1	7868893	7870063		.			7862749		.			6144		.	7868895	993	0	.			6146
chrIII	WBGene00001458	flp-15	-1	13663301	13667737		.			13667737		.			0		.				.
chrII	WBGene00001459	flp-16	1	13235236	13237282		.			13235021	13235021	.			215	215	.	13235236	1370	0	.			215	215
chrIV	WBGene00001460	flp-17	-1	17190168	17191855		.			17191971		.			116		.	17191855	1684	1	.			116
chrX	WBGene00001462	flp-19	1	10604748	10605768		.				10604747	.				1	.	10604658	54	0	.				-89
chrIII	WBGene00001470	flt-1	-1	7650487	7655967		.	7656510	7656517	7656510		.	543	550	543		.	7655967	455	2	.	543	550	543
chrV	WBGene00001475	fmi-1	1	13019053	13033384		.	13019038	13019038		13019038	.	15	15		15	.				.
chrIV	WBGene00001476	fmo-1	1	10661837	10664384		.			10661986	10661987	.			-149	-150	.	10662027	210	0	.			41	40
chrIV	WBGene00001477	fmo-2	1	10682504	10684365		.				10682503	.				1	.				.
chrIII	WBGene00001478	fmo-3	1	10694548	10698769		.				10694563	.				-15	.				.
chrV	WBGene00001479	fmo-4	-1	13603283	13606691		.	13609875	13609878	13608542	13609875	.	3184	3187	1851	3184	.	13606689	142	0	.	3186	3189	1853	3186
chrV	WBGene00001480	fmo-5	-1	899313	903580		.	903576		903576	903576	.	-4		-4	-4	.				.
chrX	WBGene00001484	fox-1	-1	2445794	2450500		.	2456515	2456515	2456096	2456057	.	6015	6015	5596	5557	.	2450496	568	0	.	6019	6019	5600	5561
chrI	WBGene00001488	frm-1	-1	14875773	14900319	Different TSS	.		14902948		14900320	.		2629		1	.	14897356	545	2	.		5592		2964
chrIII	WBGene00001489	frm-2	-1	5976651	5982077	Different TSS	.		5983826			.		1749			.	5982076	171	0	.		1750
chrX	WBGene00001490	frm-3	1	11576180	11580873		.	11569891			11572070	.	6289			4110	.	11576182	19	1	.	6291			4112
chrI	WBGene00001491	frm-4	-1	5402898	5408462	Same TSS	.	5409709	5409709	5409709	5409674	.	1247	1247	1247	1212	.	5408347	747	3	.	1362	1362	1362	1327
chrIV	WBGene00001492	frm-5	-1	39226	48844		.	51329	51237	51329	51329	.	2485	2393	2485	2485	.	48873	117	0	.	2456	2364	2456	2456
chrV	WBGene00001493	frm-7	1	12302465	12306953		.		12295266	12295589	12300526	.		7199	6876	1939	.	12302465	839	1	.		7199	6876	1939
chrV	WBGene00001496	frm-10	1	13463136	13467212	Different TSS	.	13463148	13463108	13463155	13463108	.	-12	28	-19	28	.	13463206	78	0	.	58	98	51	98
chrII	WBGene00001498	fars-3	1	8464795	8467028		.		8464725		8464691	.		70		104	.	8464797	526	169	.		72		106
chrI	WBGene00001501	ftn-2	-1	3680181	3680947		.	3681967	3681967	3681967	3681967	.	1020	1020	1020	1020	.	3680930	1351	5	.	1037	1037	1037	1037
chrX	WBGene00001502	ftt-2	-1	11603640	11605354	Same TSS	.	11605591	11605591	11605591	11605591	.	237	237	237	237	.	11605345	10606	25	.	246	246	246	246
chrV	WBGene00001506	fut-2	-1	6573966	6575780		.	6575850				.	70				.				.
chrV	WBGene00001508	fut-8	-1	5986950	5990235		.		5995715		5991503	.		5480		1268	.	5990235	54	0	.		5480		1268
chrII	WBGene00001509	fzo-1	-1	5833307	5836182		.	5836404	5836404	5836404	5836404	.	222	222	222	222	.	5836182	155	0	.	222	222	222	222
chrII	WBGene00001510	fzr-1	-1	9640936	9644407		.	9647239	9646842	9647239	9647239	.	2832	2435	2832	2832	.	9644407	1057	5	.	2832	2435	2832	2832
chrII	WBGene00001511	fzy-1	1	5501616	5503889		.		5501492			.		124			.	5501616	3423	3	.		124
chrIII	WBGene00001512	gab-1	-1	12771777	12779625		.			12779735	12779724	.			110	99	.	12779625	124	0	.			110	99
chrV	WBGene00001513	gad-1	-1	6431308	6433481		.	6433663	6433663	6433663	6433663	.	182	182	182	182	.	6433479	346	2	.	184	184	184	184
chrIII	WBGene00001514	xnd-1	1	5604417	5607511		.		5603821			.		596			.	5604418	530	4	.		597
chrX	WBGene00001515	gap-1	1	2192497	2195341		.			2189832	2191935	.			2665	562	.	2192514	7	0	.			2682	579
chrIII	WBGene00001518	gar-2	1	6309326	6320819	Different TSS	.			6308065	6308065	.			1261	1261	.	6309326	118	0	.			1261	1261
chrX	WBGene00001520	gas-1	-1	15586745	15590329		.		15590610		15590610	.		281		281	.	15590329	2275	3	.		281		281
chrII	WBGene00001522	gbh-1	-1	10690392	10693752		.		10693751		10693751	.		-1		-1	.				.
chrII	WBGene00001523	gbh-2	1	8485887	8487512		.	8483960	8483959		8485778	.	1927	1928		109	.	8485878	119	0	.	1918	1919		100
chrII	WBGene00001527	gcs-1	-1	9035500	9038243		.				9038769	.				526	.	9038240	217	288	.				529
chrV	WBGene00001533	gcy-6	-1	10308266	10314028		.		10314479		10314479	.		451		451	.				.
chrIV	WBGene00001558	gdi-1	-1	14790788	14792855	Different TSS	.	14792715				.	-140				.	14792853	3074	397	.	-138
chrIII	WBGene00001561	gei-4	-1	344298	348608	Same TSS	.	354797	354797	354797	354797	.	6189	6189	6189	6189	.	348426	673	5	.	6371	6371	6371	6371
chrIV	WBGene00001562	lin-66	1	13888064	13892988	Different TSS	.	13887876	13887876	13887876	13887876	.	188	188	188	188	.	13888064	1590	3	.	188	188	188	188
chrV	WBGene00001563	gei-6	-1	7226357	7230830		.		7230971		7230971	.		141		141	.	7230830	838	0	.		141		141
chrV	WBGene00001564	gei-7	-1	724208	728104	Same TSS	.	728007	728007	728007	728007	.	-97	-97	-97	-97	.				.
chrIII	WBGene00001565	gei-8	-1	8111100	8125409	Different TSS	.	8127019	8127028			.	1610	1619			.	8121166	96	0	.	5853	5862
chrI	WBGene00001568	gei-11	1	8962315	8966123	Same TSS	.	8962102	8962104			.	213	211			.	8962315	237	0	.	213	211
chrX	WBGene00001569	gei-12	-1	1986197	1989599		.	1989714	1989714			.	115	115			.	1989601	331	2	.	113	113
chrIII	WBGene00001570	gei-13	-1	9632104	9637032		.	9641920	9641915		9641915	.	4888	4883		4883	.	9637032	373	1	.	4888	4883		4883
chrII	WBGene00001571	gei-14	-1	8273419	8275971		.				8276093	.				122	.	8275971	158	2	.				122
chrX	WBGene00001572	gei-15	-1	6819967	6823231		.	6823417	6823427		6823417	.	186	196		186	.	6823229	722	0	.	188	198		188
chrIV	WBGene00001577	gem-4	1	11745617	11748662		.	11744934	11743989	11744675		.	683	1628	942		.	11745638	135	1	.	704	1649	963
chrIV	WBGene00001579	gex-2	1	572723	583601		.	572714	572714		572714	.	9	9		9	.	572769	499	2	.	55	55		55
chrIV	WBGene00001580	gex-3	1	12404407	12408665		.	12404349	12404357	12404357	12404350	.	58	50	50	57	.	12404407	85	0	.	58	50	50	57
chrI	WBGene00001582	gfi-2	1	9737807	9744113	Same TSS	.	9731487	9731624		9731495	.	6320	6183		6312	.	9737814	141	3	.	6327	6190		6319
chrIV	WBGene00001584	gfi-4	-1	7646189	7654219	Different TSS	.		7654500		7654500	.		281		281	.	7654251	289	4	.		249		249
chrIV	WBGene00001585	gfl-1	1	11521266	11522193		.		11521193			.		73			.	11521268	550	7	.		75
chrII	WBGene00001586	ggr-1	1	10694995	10702465		.			10695021		.			-26		.				.
chrV	WBGene00001591	glc-1	1	16219589	16221896		.			16219603	16219603	.			-14	-14	.				.
chrI	WBGene00001596	gld-2	1	6369967	6385715	Different TSS	.				6369945	.				22	.	6376664	129	0	.				6719
chrII	WBGene00001597	gld-3	1	7132601	7137175	Same TSS	.				7132394	.				207	.	7132601	1561	2	.				207
chrI	WBGene00001598	glh-1	1	6854687	6857536		.				6854753	.				-66	.	6854687	7	2	.				-66
chrI	WBGene00001601	glh-4	1	3726014	3731227		.			3724851		.			1163		.	3727030	6	0	.			2179
chrX	WBGene00001602	gln-1	1	6058219	6060199		.	6058010	6058010	6058016	6058010	.	209	209	203	209	.	6058220	316	7	.	210	210	204	210
chrIV	WBGene00001604	gln-3	-1	16167751	16170794	Different TSS	.	16170784	16170793	16170779	16170784	.	-10	-1	-15	-10	.				.
chrIII	WBGene00001612	glr-1	-1	8584106	8588535		.				8588794	.				259	.				.
chrIII	WBGene00001613	glr-2	-1	7138621	7144770	Same TSS	.				7144915	.				145	.	7145008	2	0	.				-93
chrII	WBGene00001615	glr-4	-1	7785022	7794267	Same TSS	.			7797917	7795403	.			3650	1136	.	7794267	21	0	.			3650	1136
chrV	WBGene00001616	glr-5	1	8716473	8720871		.				8715758	.				715	.	8716473	10	0	.				715
chrX	WBGene00001617	glr-6	-1	6836346	6840575	Different TSS	.	6840969	6840969	6840975	6840975	.	394	394	400	400	.	6840678	25	0	.	291	291	297	297
chrII	WBGene00001623	glt-5	-1	9706437	9708828		.			9710438		.			1610		.	9708826	163	1	.			1612
chrIII	WBGene00001630	gly-5	1	13187291	13204793	Same TSS	.		13187108			.		183			.	13187291	182	1	.		183
chrIII	WBGene00001631	gly-6	-1	4324261	4331200	Different TSS	.		4331199			.		-1			.	4327960	497	2	.		3239
chrV	WBGene00001632	gly-7	-1	1815851	1821322		.	1821417	1821417		1821417	.	95	95		95	.	1821322	334	3	.	95	95		95
chrIII	WBGene00001633	gly-8	1	11624891	11628138		.				11625038	.				-147	.	11625142	1637	4	.				104
chrX	WBGene00001637	gly-12	1	7485819	7490651	Same TSS	.	7486025	7486025		7486025	.	-206	-206		-206	.				.
chrV	WBGene00001645	gly-20	1	11282552	11286024		.		11281643			.		909			.	11282554	853	3	.		911
chrV	WBGene00001646	gna-1	-1	10319510	10320133		.	10320298	10320289		10320293	.	165	156		160	.	10320133	129	0	.	165	156		160
chrI	WBGene00001647	gna-2	1	7699539	7700958		.		7699648			.		-109			.	7699541	216	1	.		-107
chrI	WBGene00001648	goa-1	1	7522110	7526198		.	7518817	7518817	7518817	7518817	.	3293	3293	3293	3293	.	7522112	1546	6	.	3295	3295	3295	3295
chrX	WBGene00001649	gob-1	1	15493468	15497400	Different TSS	.	15492882	15492882		15492895	.	586	586		573	.	15493540	441	0	.	658	658		645
chrIV	WBGene00001653	gon-4	1	10197798	10202987	Same TSS	.		10197556		10197556	.		242		242	.	10197797	417	1	.		241		241
chrIII	WBGene00001660	gop-1	1	5254431	5258883		.		5254319			.		112			.	5254399	190	0	.		80
chrIV	WBGene00001669	gpa-7	1	10403998	10408245		.		10403565	10403565	10403565	.		433	433	433	.	10403993	101	1	.		428	428	428
chrV	WBGene00001671	gpa-9	-1	12646809	12649296	Different TSS	.	12649749	12649714			.	453	418			.				.
chrII	WBGene00001679	gpb-1	-1	11743329	11748548	Different TSS	.	11749407	11751636	11749407	11751570	.	859	3088	859	3022	.	11747748	5938	10	.	1659	3888	1659	3822
chrI	WBGene00001680	gpb-2	-1	7318297	7321090		.	7321567	7321567	7321567	7321571	.	477	477	477	481	.	7321083	270	2	.	484	484	484	488
chrI	WBGene00001682	gpc-2	1	6757461	6758180		.	6757367	6757367	6757367	6757367	.	94	94	94	94	.	6757764	5957	37	.	397	397	397	397
chrII	WBGene00001683	gpd-1	1	10394054	10395288		.				10393837	.				217	.	10394069	2740	8	.				232
chrII	WBGene00001686	gpd-4	1	10171211	10172437		.	10169593	10169593		10171016	.	1618	1618		195	.	10171211	1527	3	.	1618	1618		195
chrX	WBGene00001687	gpn-1	1	15681658	15687404		.		15681656		15681656	.		2		2	.				.
chrIV	WBGene00001692	grd-3	1	3439652	3440453		.				3439656	.				-4	.				.
chrV	WBGene00001694	grd-5	1	8619010	8619847		.	8618134	8618134		8618048	.	876	876		962	.	8619017	6094	1	.	883	883		969
chrV	WBGene00001695	grd-6	1	9221867	9224326		.				9221870	.				-3	.				.
chrIV	WBGene00001699	grd-10	1	3441088	3441785		.				3441145	.				-57	.	3441156	14	0	.				11
chrIV	WBGene00001702	grd-13	1	3438309	3439499		.				3438287	.				22	.	3438354	1439	6	.				67
chrX	WBGene00001703	grd-14	1	8499611	8500984		.				8499516	.				95	.	8499968	3971	1	.				452
chrI	WBGene00001707	grh-1	-1	1259491	1268157		.	1271167	1271166	1271166	1271166	.	3010	3009	3009	3009	.	1268157	191	0	.	3010	3009	3009	3009
chrX	WBGene00001708	grk-1	-1	9991799	9999120		.	9999532	9999532	9999532	9999155	.	412	412	412	35	.	9999052	54	0	.	480	480	480	103
chrIII	WBGene00001709	grk-2	1	676117	680042		.		671304		668546	.		4813		7571	.	676117	113	0	.		4813		7571
chrIV	WBGene00001713	grl-4	-1	7309824	7310749		.	7311220		7311220	7311220	.	471		471	471	.	7310747	3613	4	.	473		473	473
chrV	WBGene00001714	grl-5	-1	4412733	4414612		.		4414607		4414593	.		-5		-19	.				.
chrV	WBGene00001716	grl-7	-1	11344799	11346996	Same TSS	.				11347719	.				723	.	11346994	1150	0	.				725
chrV	WBGene00001719	grl-10	1	7774497	7775740		.		7774517		7774517	.		-20		-20	.	7774718	3	0	.		201		201
chrIII	WBGene00001724	grl-15	-1	12232531	12235610		.	12235601	12235601		12235609	.	-9	-9		-1	.				.
chrI	WBGene00001725	grl-16	-1	572180	575122	Same TSS	.		575121		575121	.		-1		-1	.				.
chrIV	WBGene00001730	grl-21	1	10737457	10738171		.	10737456			10737456	.	1			1	.	10737537	2	0	.	81			81
chrIII	WBGene00001743	grp-1	1	8085638	8088382		.		8085528			.		110			.	8085639	825	3	.		111
chrIII	WBGene00001744	gars-1	-1	5159690	5163588	Different TSS	.		5163377		5163377	.		-211		-211	.	5162238	1286	22	.		1139		1139
chrI	WBGene00001745	gsa-1	1	1068594	1075013		.	1068608	1068582	1068612	1068608	.	-14	12	-18	-14	.				.
chrV	WBGene00001747	gsp-1	1	10682401	10686485	Same TSS	.	10680503	10680506	10677641	10677641	.	1898	1895	4760	4760	.	10682401	2846	7	.	1898	1895	4760	4760
chrIII	WBGene00001748	gsp-2	1	7336521	7338697		.	7336363	7336363	7335481	7335481	.	158	158	1040	1040	.	7336523	2161	11	.	160	160	1042	1042
chrIV	WBGene00001752	gst-4	1	10142140	10143079		.	10142189			10142189	.	-49			-49	.				.
chrII	WBGene00001753	gst-5	1	10950290	10951546	Different TSS	.	10950290		10950294	10950294	.	0		-4	-4	.				.
chrII	WBGene00001754	gst-6	1	4879880	4881105		.				4879885	.				-5	.	4879895	13	0	.				10
chrII	WBGene00001755	gst-7	1	4882066	4883356		.	4882067	4882067	4882067	4882067	.	-1	-1	-1	-1	.				.
chrII	WBGene00001761	gst-13	1	9231437	9232281		.	9231438			9231438	.	-1			-1	.				.
chrII	WBGene00001764	gst-16	-1	13622895	13624363		.	13624371	13624371	13624381	13624381	.	8	8	18	18	.				.
chrII	WBGene00001767	gst-19	-1	13625474	13627071		.		13627078			.		7			.				.
chrII	WBGene00001768	gst-20	-1	13608115	13609710		.	13609709	13609709	13609709	13609709	.	-1	-1	-1	-1	.				.
chrV	WBGene00001769	gst-21	-1	1730759	1732000	Different TSS	.				1731951	.				-49	.	1731562	67	0	.				389
chrV	WBGene00001770	gst-22	-1	16231014	16232262		.				16232261	.				-1	.				.
chrII	WBGene00001772	gst-24	-1	13610373	13611272		.			13611231		.			-41		.				.
chrII	WBGene00001774	gst-26	-1	15163732	15164508		.				15164455	.				-53	.	15164477	89	210	.				-22
chrII	WBGene00001776	gst-28	-1	15166119	15167332		.			15167322	15167411	.			-10	79	.	15167330	634	2	.			-8	81
chrII	WBGene00001778	gst-30	-1	4933877	4935015		.			4935031		.			16		.				.
chrV	WBGene00001781	gst-33	-1	3467450	3468498		.			3468519	3468519	.			21	21	.				.
chrX	WBGene00001784	gst-36	-1	9861592	9862897		.			9863296	9863305	.			399	408	.	9862902	1231	2	.			394	403
chrV	WBGene00001786	gst-38	-1	15915149	15916060		.	15915956			15915956	.	-104			-104	.				.
chrX	WBGene00001790	gst-42	-1	11726203	11727830		.				11727783	.				-47	.	11727731	228	1	.				52
chrI	WBGene00001791	gst-43	1	2901337	2903007		.		2901141			.		196			.	2901329	1471	6	.		188
chrII	WBGene00001793	gsy-1	-1	12866379	12878035		.				12878767	.				732	.	12878045	689	3	.				722
chrIV	WBGene00001794	gta-1	1	10180636	10183937		.	10180545	10180545	10180545	10180545	.	91	91	91	91	.	10180638	2084	10	.	93	93	93	93
chrV	WBGene00001808	gut-2	1	13497690	13498806	Different TSS	.		13497719			.		-29			.				.
chrII	WBGene00001812	haf-2	-1	7353535	7356383		.		7356914		7356938	.		531		555	.	7356383	360	3	.		531		555
chrV	WBGene00001813	haf-3	-1	15760429	15766157		.		15766317			.		160			.	15766153	502	1	.		164
chrI	WBGene00001819	haf-9	1	6081800	6085964	Same TSS	.	6080697	6080697			.	1103	1103			.	6081814	274	0	.	1117	1117
chrIV	WBGene00001820	ham-1	1	12542011	12545701		.	12542163	12542163		12542163	.	-152	-152		-152	.	12542011	53	0	.	-152	-152		-152
chrX	WBGene00001821	ham-2	1	4554665	4558829	Different TSS	.	4554143	4554174	4552327		.	522	491	2338		.	4554665	79	0	.	522	491	2338
chrX	WBGene00001824	hbl-1	1	5822242	5826399	Different TSS	.	5818623	5818623		5814538	.	3619	3619		7704	.	5823034	283	0	.	4411	4411		8496
chrIV	WBGene00001827	hcf-1	-1	7770756	7774258		.		7774352			.		94			.	7774263	588	4	.		89
chrX	WBGene00001828	hch-1	-1	14696342	14699907		.	14699905	14699905			.	-2	-2			.				.
chrV	WBGene00001829	hcp-1	1	6594177	6599189		.		6593888		6593888	.		289		289	.	6594187	1441	4	.		299		299
chrV	WBGene00001830	hcp-2	1	9645816	9650285		.		9645735			.		81			.	9645837	343	3	.		102
chrI	WBGene00001832	hcp-4	-1	3862778	3865941		.		3866036			.		95			.	3865941	1288	5	.		95
chrV	WBGene00001834	hda-1	1	14525372	14527398		.	14524448	14524448	14524448	14524448	.	924	924	924	924	.	14525374	2112	4	.	926	926	926	926
chrX	WBGene00001837	hda-4	1	16729486	16743726	Different TSS	.	16727087	16727087	16727115	16727092	.	2399	2399	2371	2394	.	16729486	286	0	.	2399	2399	2371	2394
chrII	WBGene00001840	hel-1	-1	8326799	8328827	Same TSS	.	8329013	8329013	8329013	8329013	.	186	186	186	186	.	8328820	2640	22	.	193	193	193	193
chrV	WBGene00001842	her-1	1	9697105	9701527	Different TSS	.	9697069				.	36				.				.
chrI	WBGene00001843	hgo-1	-1	9049452	9055439		.	9055391	9055391	9055391	9055391	.	-48	-48	-48	-48	.				.
chrX	WBGene00001844	hid-1	1	2489036	2494330	Same TSS	.	2488954	2488954	2488954	2488954	.	82	82	82	82	.	2489038	296	1	.	84	84	84	84
chrV	WBGene00001851	hif-1	1	20780380	20785227	Different TSS	.	20778561	20778559	20778654	20778579	.	1819	1821	1726	1801	.	20780382	1424	2	.	1821	1823	1728	1803
chrV	WBGene00001852	hil-1	1	14949760	14952775		.			14948890		.			870		.	14949760	2483	2	.			870
chrIV	WBGene00001853	hil-2	1	6294229	6295209	Different TSS	.	6294231	6294228	6294231	6294231	.	-2	1	-2	-2	.				.
chrX	WBGene00001854	hil-3	1	8159105	8160037		.	8159107	8159107	8159107	8159107	.	-2	-2	-2	-2	.				.
chrV	WBGene00001855	hil-4	1	4754299	4755459		.	4754298	4754298	4754298	4754298	.	1	1	1	1	.				.
chrI	WBGene00001856	hil-5	1	5774588	5775613		.	5774587	5774587	5774587	5774587	.	1	1	1	1	.				.
chrIV	WBGene00001858	hil-7	1	6646023	6646928	Different TSS	.		6646011			.		12			.				.
chrV	WBGene00001864	him-5	1	14090799	14092417	Different TSS	.			14090806	14090806	.			-7	-7	.				.
chrIV	WBGene00001867	him-8	1	10561894	10563954	Different TSS	.		10561818			.		76			.	10561885	15	86	.		67
chrV	WBGene00001874	him-17	1	13176695	13180173		.		13176600			.		95			.	13176697	964	5	.		97
chrV	WBGene00001875	his-1	1	16042500	16042811		.	16042465	16042465	16042465	16042465	.	35	35	35	35	.				.
chrV	WBGene00001876	his-2	-1	16041808	16042263		.		16042288		16042288	.		25		25	.				.
chrV	WBGene00001877	his-3	1	16040774	16041171		.		16040752			.		22			.				.
chrV	WBGene00001879	his-5	1	8535182	8535560		.		8535154			.		28			.				.
chrV	WBGene00001880	his-6	-1	8534545	8534955		.		8534980		8534980	.		25		25	.				.
chrV	WBGene00001881	his-7	1	8533358	8533741		.	8533323	8533323	8533323	8533323	.	35	35	35	35	.				.
chrX	WBGene00001898	his-24	1	14490037	14491045		.	14490023	14490023	14490023	14490023	.	14	14	14	14	.				.
chrIV	WBGene00001905	his-31	-1	8333659	8333992		.	8334005	8334005	8334005	8334005	.	13	13	13	13	.				.
chrIV	WBGene00001906	his-32	1	8334285	8334752		.	8334260	8334260	8334260	8334260	.	25	25	25	25	.				.
chrV	WBGene00001909	his-35	-1	9544627	9545266		.	9545371	9545371	9545369	9545371	.	105	105	103	105	.	9545264	868	101	.	107	107	105	107
chrV	WBGene00001911	his-37	1	9547042	9547585		.	9547064	9547062	9547058	9547064	.	-22	-20	-16	-22	.				.
chrV	WBGene00001913	his-39	1	8536292	8536694		.		8535697			.		595			.				.
chrIV	WBGene00001933	his-59	1	7488206	7489131		.				7488203	.				3	.				.
chrIV	WBGene00001934	his-60	-1	7487556	7487999		.	7488012	7488012	7488012	7488012	.	13	13	13	13	.				.
chrIV	WBGene00001935	his-61	-1	7485737	7486206		.	7486236	7486236		7486236	.	30	30		30	.				.
chrIV	WBGene00001936	his-62	1	7486524	7487162		.		7486505		7486353	.		19		171	.				.
chrIV	WBGene00001937	his-63	-1	11406365	11406871		.		11406668			.		-203			.				.
chrIV	WBGene00001938	his-64	1	11407078	11407474		.	11407061	11407061		11407061	.	17	17		17	.				.
chrI	WBGene00001941	his-67	-1	9988336	9988786		.	9988785	9988785		9988785	.	-1	-1		-1	.				.
chrI	WBGene00001942	his-68	1	9989091	9989605		.	9989090	9989090	9989090	9989090	.	1	1	1	1	.				.
chrX	WBGene00001945	his-71	-1	7981333	7982027		.	7982618	7982572	7982618	7982618	.	591	545	591	591	.	7982022	3077	3	.	596	550	596	596
chrIII	WBGene00001946	his-72	-1	12367374	12368949	Different TSS	.	12368970	12368970	12368970	12368970	.	21	21	21	21	.	12368063	19043	48	.	907	907	907	907
chrII	WBGene00001948	hlh-1	1	4518557	4522454	Same TSS	.		4518556			.		1			.	4519064	546	0	.		508
chrI	WBGene00001949	hlh-2	-1	7190846	7193914		.	7194868	7194860			.	954	946			.	7193912	783	1	.	956	948
chrII	WBGene00001950	hlh-3	1	9086547	9087856		.	9086279	9086279			.	268	268			.	9086547	297	0	.	268	268
chrIII	WBGene00001955	hlh-11	1	9622060	9626453	Same TSS	.			9619604	9619641	.			2456	2419	.	9622063	62	0	.			2459	2422
chrX	WBGene00001959	hlh-15	-1	2412962	2413281		.	2413350	2413346			.	69	65			.				.
chrII	WBGene00001971	hmg-1.1	1	14250618	14251373		.	14250480	14250480	14250480	14250480	.	138	138	138	138	.	14250620	6035	38	.	140	140	140	140
chrIII	WBGene00001972	hmg-1.2	1	6280332	6283068	Different TSS	.	6280333	6280432	6280366	6280432	.	-1	-100	-34	-100	.	6280572	1153	6	.	239	140	206	140
chrI	WBGene00001973	hmg-3	-1	5815059	5818128		.				5818265	.				137	.	5818129	4	4	.				136
chrIII	WBGene00001974	hmg-4	-1	7379077	7381531		.		7381882		7381882	.		351		351	.	7381531	381	0	.		351		351
chrII	WBGene00001976	hmg-11	1	4672795	4673744		.	4672949	4672949	4672950	4672950	.	-154	-154	-155	-155	.	4673082	1621	2	.	133	133	132	132
chrII	WBGene00001977	hmg-12	1	11916448	11918256		.	11916357	11916380		11916380	.	91	68		68	.	11916450	1013	8	.	93	70		70
chrV	WBGene00001978	hmp-1	1	11845858	11852146	Different TSS	.	11845078	11845207	11845085	11845085	.	780	651	773	773	.	11845858	285	5	.	780	651	773	773
chrI	WBGene00001980	hmr-1	-1	11075751	11134660	Different TSS	.		11137540			.		2880			.	11094517	1688	0	.		43023
chrX	WBGene00001981	hnd-1	1	11684638	11685712		.		11684614			.		24			.				.
chrX	WBGene00001984	hog-1	-1	5851999	5854219	Different TSS	.	5854219	5854228		5854218	.	0	9		-1	.	5853372	18	0	.	847	856		846
chrV	WBGene00001986	hot-1	1	14621126	14629372	Same TSS	.				14618950	.				2176	.	14621120	128	0	.				2170
chrII	WBGene00001988	hot-3	-1	13930451	13931923		.				13932580	.				657	.	13931964	110	0	.				616
chrIII	WBGene00001989	hot-4	1	6220502	6224392	Same TSS	.			6219722		.			780		.	6220485	63	1	.			763
chrV	WBGene00001991	hot-6	-1	11021043	11022855		.		11022903			.		48			.	11022916	138	0	.		-13
chrIII	WBGene00001993	hpd-1	1	10535428	10537585		.	10534339		10534339	10534339	.	1089		1089	1089	.	10535428	3185	9	.	1089		1089	1089
chrX	WBGene00001994	hpk-1	-1	4211686	4217266	Different TSS	.			4217395		.			129		.	4217266	195	0	.			129
chrX	WBGene00001995	hpl-1	1	13245321	13246975		.		13245284		13245284	.		37		37	.	13245343	86	0	.		59		59
chrIV	WBGene00001999	hrp-1	-1	3336921	3338864	Different TSS	.	3338829	3338829	3338857	3338829	.	-35	-35	-7	-35	.	3338541	3441	19	.	288	288	316	288
chrI	WBGene00002000	hrp-2	-1	12060267	12064890	Different TSS	.	12065310	12065310		12065310	.	420	420		420	.	12064888	4289	11	.	422	422		422
chrIV	WBGene00002001	hars-1	1	10858934	10861275	Same TSS	.	10858857	10858857	10858857	10858857	.	77	77	77	77	.	10858936	1175	4	.	79	79	79	79
chrI	WBGene00002004	hsf-1	-1	11953502	11961977		.		11965046	11965048	11965048	.		3069	3071	3071	.	11961975	463	10	.		3071	3073	3073
chrIV	WBGene00002005	hsp-1	1	17278920	17281298		.	17278625	17278625	17278625	17278625	.	295	295	295	295	.	17278922	27860	97	.	297	297	297	297
chrX	WBGene00002007	hsp-3	-1	6088993	6092089		.	6091991	6091991	6092038	6091991	.	-98	-98	-51	-98	.	6091750	12567	22	.	241	241	288	241
chrII	WBGene00002008	hsp-4	-1	7350076	7352593		.	7352615	7352615	7352615	7352615	.	22	22	22	22	.	7352475	2422	29	.	140	140	140	140
chrV	WBGene00002010	hsp-6	-1	4824124	4826746		.	4827090	4827090	4827090	4827090	.	344	344	344	344	.	4826746	2806	19	.	344	344	344	344
chrIII	WBGene00002011	hsp-12.2	1	8138024	8139565		.	8137843	8137843	8137843	8137843	.	181	181	181	181	.	8138050	2186	6	.	207	207	207	207
chrIV	WBGene00002012	hsp-12.3	-1	9444771	9445307		.	9445306	9445306	9445306		.	-1	-1	-1		.				.
chrIV	WBGene00002013	hsp-12.6	-1	9446368	9446892		.			9446935		.			43		.	9446893	2816	2	.			42
chrV	WBGene00002016	hsp-16.2	-1	1804333	1804970		.	1804967	1804967	1804967	1804967	.	-3	-3	-3	-3	.	1804895	8	0	.	72	72	72	72
chrV	WBGene00002018	hsp-16.41	1	1805232	1805874		.	1805231	1805231	1805231	1805231	.	1	1	1	1	.				.
chrV	WBGene00002021	hsp-17	-1	8384754	8385907	Same TSS	.			8385971	8386241	.			64	334	.	8385907	1496	2	.			64	334
chrX	WBGene00002023	hsp-25	-1	6034057	6039461	Different TSS	.			6042137	6042137	.			2676	2676	.	6039201	1968	8	.			2936	2936
chrX	WBGene00002024	hsp-43	-1	6233113	6235505	Same TSS	.			6235700		.			195		.	6235505	1101	1	.			195
chrIII	WBGene00002025	hsp-60	1	1619733	1625911	Same TSS	.		1619231		1619250	.		502		483	.	1619741	1887	9	.		510		491
chrI	WBGene00002026	hsp-70	-1	9320353	9322503		.			9322525		.			22		.				.
chrI	WBGene00002027	hsr-9	1	9626252	9630839		.	9626105	9626147		9626147	.	147	105		105	.	9626233	496	1	.	128	86		86
chrX	WBGene00002029	hst-2	-1	11204044	11207026		.		11207034		11207034	.		8		8	.				.
chrII	WBGene00002030	hst-3.1	-1	6165692	6169202		.		6170281			.		1079			.	6169220	14	0	.		1061
chrX	WBGene00002031	hst-6	1	5275535	5278485		.	5275425	5275427			.	110	108			.	5275535	37	0	.	110	108
chrIV	WBGene00002032	htp-1	-1	5390182	5391549		.				5391757	.				208	.	5391549	866	3	.				208
chrIV	WBGene00002033	htp-2	1	6419496	6420890		.				6419470	.				26	.	6419518	829	0	.				48
chrI	WBGene00002035	hum-1	-1	8845800	8851111		.			8852612	8852612	.			1501	1501	.	8851109	139	3	.			1503	1503
chrIII	WBGene00002038	hum-5	-1	4029088	4036816		.	4037342	4037342		4037342	.	526	526		526	.	4036810	522	1	.	532	532		532
chrX	WBGene00002039	hum-6	1	2303074	2315390		.	2302146	2302146			.	928	928			.	2303076	186	0	.	930	930
chrIV	WBGene00002043	hyl-1	1	8540541	8544366		.	8540469	8540469		8540473	.	72	72		68	.	8540589	103	0	.	120	120		116
chrX	WBGene00002044	hyl-2	-1	4697218	4699433		.	4700448	4700448		4700225	.	1015	1015		792	.	4699433	560	4	.	1015	1015		792
chrI	WBGene00002047	icp-1	-1	2304472	2306818		.	2306891	2306891		2306891	.	73	73		73	.	2306792	826	4	.	99	99		99
chrIII	WBGene00002048	ida-1	1	5755493	5765769		.	5755491	5755491	5755491	5755491	.	2	2	2	2	.				.
chrX	WBGene00002051	ifa-3	-1	16267184	16269983		.	16270741	16270741			.	758	758			.	16269989	107	0	.	752	752
chrX	WBGene00002052	ifa-4	-1	4912270	4915956		.	4917425				.	1469				.	4915948	3022	1	.	1477
chrII	WBGene00002053	ifb-1	1	5765598	5772056	Same TSS	.		5764388		5764388	.		1210		1210	.	5768925	1315	1	.		4537		4537
chrII	WBGene00002054	ifb-2	1	5750168	5754121	Same TSS	.	5749935	5749935	5749935	5749935	.	233	233	233	233	.	5750170	3125	3	.	235	235	235	235
chrV	WBGene00002055	ifc-1	1	2881383	2883752		.				2881304	.				79	.	2881391	226	1	.				87
chrX	WBGene00002058	ifd-2	-1	813851	815928		.				816058	.				130	.	815928	371	0	.				130
chrX	WBGene00002060	ife-2	-1	381382	382710		.		382808			.		98			.	382710	1518	6	.		98
chrV	WBGene00002061	ife-3	-1	6589	7822	Same TSS	.	8690	8795	8712	8192	.	868	973	890	370	.	7822	1066	8	.	868	973	890	370
chrX	WBGene00002062	ife-4	1	1104209	1106244		.	1104033	1104033		1104033	.	176	176		176	.	1104209	161	1	.	176	176		176
chrIII	WBGene00002064	iff-1	-1	9745779	9747108	Different TSS	.	9747227	9747227		9747227	.	119	119		119	.				.
chrII	WBGene00002065	iff-2	-1	8559342	8561301		.	8561321	8561323		8561327	.	20	22		26	.	8560913	29970	39	.	408	410		414
chrII	WBGene00002066	ifg-1	1	8217181	8221459	Different TSS	.	8216563	8216563		8216563	.	618	618		618	.	8217181	573	5	.	618	618		618
chrII	WBGene00002068	ify-1	-1	5054081	5055327		.		5055326		5055326	.		-1		-1	.	5055171	1081	4	.		155		155
chrI	WBGene00002069	ikb-1	1	9685473	9688639		.	9685484	9685484	9685414		.	-11	-11	59		.				.
chrX	WBGene00002071	ile-2	1	768595	770771		.	768355	768355	768355	768355	.	240	240	240	240	.	768595	685	3	.	240	240	240	240
chrV	WBGene00002072	ima-1	1	11239657	11241762		.	11239399	11239399	11239399	11239399	.	258	258	258	258	.	11239687	245	4	.	288	288	288	288
chrI	WBGene00002073	ima-2	1	6315233	6317269		.				6314965	.				268	.	6315235	3408	12	.				270
chrIV	WBGene00002074	ima-3	-1	7559408	7561655		.	7561898	7561898	7561898	7561906	.	243	243	243	251	.	7561653	994	18	.	245	245	245	253
chrI	WBGene00002075	imb-1	-1	4920773	4926236		.		4926470		4926509	.		234		273	.	4926234	1200	1	.		236		275
chrII	WBGene00002076	imb-2	1	14365629	14373374	Different TSS	.	14365405	14365405	14365405	14365405	.	224	224	224	224	.	14365631	621	7	.	226	226	226	226
chrI	WBGene00002077	imb-3	-1	310981	314992		.		315216			.		224			.	314990	2851	23	.		226
chrV	WBGene00002078	xpo-1	1	7805045	7814553	Different TSS	.	7804241	7804241	7804649	7804241	.	804	804	396	804	.	7805045	1657	3	.	804	804	396	804
chrI	WBGene00002079	xpo-2	-1	318543	323353		.		323501			.		148			.	323353	704	9	.		148
chrIV	WBGene00002080	xpo-3	-1	7916687	7924115		.	7924222	7924218		7924218	.	107	103		103	.	7924115	457	7	.	107	103		103
chrIII	WBGene00002081	ina-1	-1	9167962	9172728		.	9176019	9176067			.	3291	3339			.	9172724	270	0	.	3295	3343
chrIII	WBGene00002083	inf-1	1	6929984	6931898	Different TSS	.	6929307	6929725	6930011	6929725	.	677	259	-27	259	.	6930030	4574	12	.	723	305	19	305
chrII	WBGene00002085	ins-2	1	5988502	5989370		.	5988489	5988489			.	13	13			.	5988633	1	0	.	144	144
chrII	WBGene00002086	ins-3	-1	5990078	5990746		.			5990695	5990695	.			-51	-51	.	5990744	5	0	.			-49	-49
chrII	WBGene00002087	ins-4	1	5996344	5996977		.				5996294	.				50	.	5996346	48	0	.				52
chrII	WBGene00002089	ins-6	1	6000465	6000987		.	6000395	6000395	6000395		.	70	70	70		.				.
chrX	WBGene00002092	ins-9	-1	8866185	8866587		.				8866618	.				31	.				.
chrII	WBGene00002097	ins-14	-1	6745392	6745830		.			6745794	6745788	.			-36	-42	.				.
chrI	WBGene00002101	ins-18	1	8147422	8149707		.			8147483	8147483	.			-61	-61	.	8147422	81	0	.			-61	-61
chrI	WBGene00002110	ins-27	1	14026637	14027557		.				14026607	.				30	.	14027224	2040	7	.				617
chrI	WBGene00002113	ins-30	-1	14034942	14036028		.			14036042	14036042	.			14	14	.				.
chrI	WBGene00002116	ins-33	-1	13637836	13639300		.				13639299	.				-1	.	13639212	3	0	.				87
chrX	WBGene00002123	inx-1	-1	6943699	6956357	Same TSS	.			6962551	6959611	.			6194	3254	.	6951476	194	0	.			11075	8135
chrX	WBGene00002124	inx-2	-1	11294898	11296667		.	11296992	11296992			.	325	325			.	11296667	579	1	.	325	325
chrX	WBGene00002125	inx-3	1	5996119	5998216		.	5995784	5995784			.	335	335			.	5996121	859	1	.	337	337
chrV	WBGene00002126	inx-4	-1	7961298	7965809		.		7971530			.		5721			.	7965624	5	0	.		5906
chrX	WBGene00002127	inx-5	-1	8299775	8302330		.	8305068		8305019	8304118	.	2738		2689	1788	.	8302341	428	0	.	2727		2678	1777
chrIV	WBGene00002129	inx-7	-1	5943969	5946667		.	5946651	5946655	5946655	5946655	.	-16	-12	-12	-12	.	5946661	9	1	.	-10	-6	-6	-6
chrV	WBGene00002132	inx-10	-1	9204680	9207444	Same TSS	.	9208998	9208998		9208986	.	1554	1554		1542	.	9207444	56	2	.	1554	1554		1542
chrI	WBGene00002134	inx-12	-1	3755473	3759076		.		3759079	3759075	3759188	.		3	-1	112	.	3759042	994	3	.		37	33	146
chrI	WBGene00002136	inx-14	-1	7349974	7352195	Same TSS	.			7352199		.			4		.	7352084	301	1	.			115
chrI	WBGene00002137	inx-15	-1	4159016	4161115		.		4161945		4161202	.		830		87	.	4161115	1067	5	.		830		87
chrIV	WBGene00002140	inx-18	1	606361	614026	Same TSS	.			606360		.			1		.				.
chrX	WBGene00002146	ipp-5	1	6031434	6034475		.			6031003	6025208	.			431	6226	.	6031434	418	1	.			431	6226
chrII	WBGene00002147	ire-1	-1	8112214	8124788	Different TSS	.		8124979		8124973	.		191		185	.	8124851	392	3	.		128		122
chrV	WBGene00002148	gon-14	-1	6606418	6611146	Same TSS	.		6611614	6611620	6611618	.		468	474	472	.	6611141	169	6	.		473	479	477
chrIV	WBGene00002162	isp-1	-1	8133775	8136043		.	8136252	8136252	8136252	8136252	.	209	209	209	209	.	8136041	4671	21	.	211	211	211	211
chrX	WBGene00002163	ist-1	1	7132164	7139622		.				7131145	.				1019	.	7132109	14	0	.				964
chrIII	WBGene00002169	isw-1	-1	6703940	6710002		.	6710124	6710124	6710083	6710124	.	122	122	81	122	.	6709950	1307	4	.	174	174	133	174
chrI	WBGene00002174	itx-1	1	2802824	2815788	Same TSS	.				2800972	.				1852	.	2802811	140	2	.				1839
chrIV	WBGene00002175	jac-1	-1	15997633	16026815	Different TSS	.				16026902	.				87	.	16018929	141	0	.				7973
chrX	WBGene00002177	jkk-1	1	5368436	5372027		.		5368548		5368495	.		-112		-59	.				.
chrIV	WBGene00002178	jnk-1	1	6957630	6963705	Different TSS	.			6956936		.			694		.	6957630	46	0	.			694
chrI	WBGene00002179	jph-1	-1	7946830	7951588		.	7954775	7954775	7954778	7954774	.	3187	3187	3190	3186	.	7951588	277	5	.	3187	3187	3190	3186
chrIV	WBGene00002180	jtr-1	1	1420973	1421769		.	1420382	1420382	1420382	1420382	.	591	591	591	591	.	1420980	1123	2	.	598	598	598	598
chrI	WBGene00002181	kal-1	-1	14128599	14142192		.	14143056	14143056			.	864	864			.	14142195	410	2	.	861	861
chrIII	WBGene00002182	kap-1	1	7338937	7343562	Same TSS	.		7338807		7338807	.		130		130	.	7338933	1	0	.		126		126
chrII	WBGene00002183	kat-1	1	7073754	7075509		.			7073673	7073673	.			81	81	.	7073772	2824	16	.			99	99
chrII	WBGene00002184	kel-1	1	11688906	11695998	Different TSS	.	11688218	11688206			.	688	700			.	11688887	69	0	.	669	681
chrIV	WBGene00002187	kgb-1	-1	405623	410026		.	410463	410463	410459	410467	.	437	437	433	441	.	408896	375	3	.	1567	1567	1563	1571
chrX	WBGene00002190	kin-2	-1	5971660	5977819	Different TSS	.	5984687	5984544	5984687	5984687	.	6868	6725	6868	6868	.	5977803	761	3	.	6884	6741	6884	6884
chrI	WBGene00002191	kin-3	1	10734011	10736596		.	10733844	10733845		10733849	.	167	166		162	.	10734011	2685	14	.	167	166		162
chrI	WBGene00002196	kin-10	-1	8288952	8291070	Same TSS	.	8291131	8291131	8291131	8291124	.	61	61	61	54	.	8290998	178	673	.	133	133	133	126
chrI	WBGene00002198	kin-14	-1	7075922	7079481		.	7079763	7079760	7079752		.	282	279	271		.				.
chrII	WBGene00002199	kin-15	-1	9431322	9433648	Same TSS	.				9433527	.				-121	.	9433617	2	0	.				-90
chrIII	WBGene00002201	kin-18	1	6118580	6124015	Same TSS	.		6116663	6116637	6117871	.		1917	1943	709	.	6118575	1058	3	.		1912	1938	704
chrIII	WBGene00002202	kin-19	-1	4084010	4086618		.	4087711	4087711	4087711	4087711	.	1093	1093	1093	1093	.	4086611	1989	11	.	1100	1100	1100	1100
chrX	WBGene00002203	kin-20	-1	15269057	15281557	Different TSS	.				15281447	.				-110	.	15273659	118	0	.				7788
chrX	WBGene00002207	kin-25	1	17186066	17193219	Same TSS	.	17184622	17184622		17184620	.	1444	1444		1446	.	17186306	120	1	.	1684	1684		1686
chrX	WBGene00002210	kin-29	-1	2843996	2852471		.	2852419	2852471	2852445	2852445	.	-52	0	-26	-26	.	2852401	2	0	.	18	70	44	44
chrI	WBGene00002213	kin-32	1	5086313	5093809	Different TSS	.	5083324	5084736		5084736	.	2989	1577		1577	.	5086320	124	0	.	2996	1584		1584
chrIV	WBGene00002214	klc-1	1	11084084	11086032		.	11083178	11083183	11083183	11083183	.	906	901	901	901	.	11084084	775	6	.	906	901	901	901
chrV	WBGene00002215	klc-2	-1	5575394	5581697	Different TSS	.	5582448	5582414	5582418	5582861	.	751	717	721	1164	.	5579513	600	2	.	2935	2901	2905	3348
chrII	WBGene00002216	klp-3	1	7842365	7845592	Same TSS	.	7839805	7839805	7839805	7839805	.	2560	2560	2560	2560	.	7842303	249	1	.	2498	2498	2498	2498
chrX	WBGene00002220	klp-8	1	3159928	3164419		.	3159784	3159771		3159771	.	144	157		157	.	3159930	73	0	.	146	159		159
chrIV	WBGene00002222	klp-11	-1	8755027	8762044	Different TSS	.	8762527	8762536		8762531	.	483	492		487	.	8762061	97	0	.	466	475		470
chrI	WBGene00002226	klp-16	1	9512444	9514747		.				9512496	.				-52	.	9512444	31	0	.				-52
chrIII	WBGene00002229	klp-19	-1	13302642	13307158		.		13307130		13307112	.		-28		-46	.				.
chrIII	WBGene00002230	klp-20	1	221415	228837		.	220641	220636			.	774	779			.	221415	63	0	.	774	779
chrIII	WBGene00002231	knl-1	1	8250565	8253872		.		8250459		8250466	.		106		99	.	8250563	1597	5	.		104		97
chrI	WBGene00002232	kpc-1	1	11675932	11680958	Same TSS	.				11671563	.				4369	.	11675936	342	1	.				4373
chrX	WBGene00002233	kqt-1	1	6618985	6627951	Different TSS	.				6618181	.				804	.	6618983	25	0	.				802
chrX	WBGene00002234	kqt-2	-1	8243084	8246318		.	8246220	8246220	8246220	8246220	.	-98	-98	-98	-98	.				.
chrII	WBGene00002238	kars-1	-1	7070144	7072375	Different TSS	.		7072631		7073282	.		256		907	.	7072373	1572	13	.		258		909
chrX	WBGene00002239	ksr-1	1	8275106	8283268		.	8273768	8273768			.	1338	1338			.	8275117	14	0	.	1349	1349
chrV	WBGene00002241	kup-1	-1	12032237	12040854		.	12041227	12041227		12041227	.	373	373		373	.	12040854	661	3	.	373	373		373
chrIII	WBGene00002244	laf-1	-1	2770498	2779045		.		2780923			.		1878			.	2779045	813	8	.		1878
chrV	WBGene00002246	lag-2	1	3188348	3189839		.		3188056			.		292			.	3188345	94	2	.		289
chrIV	WBGene00002247	lam-1	1	5173272	5179263		.	5169859	5169859		5172371	.	3413	3413		901	.	5173274	460	2	.	3415	3415		903
chrII	WBGene00002251	lat-1	1	8896780	8908592	Same TSS	.	8896647	8896647	8890202	8896629	.	133	133	6578	151	.	8896780	857	6	.	133	133	6578	151
chrX	WBGene00002253	lbp-1	1	3259090	3259843		.	3259125	3259114	3259125		.	-35	-24	-35		.				.
chrX	WBGene00002254	lbp-2	1	3260598	3261461		.	3260765	3260765	3260765	3260765	.	-167	-167	-167	-167	.	3260598	26	0	.	-167	-167	-167	-167
chrV	WBGene00002256	lbp-4	1	7820557	7821457		.		7820471		7819798	.		86		759	.	7820559	408	8	.		88		761
chrI	WBGene00002258	lbp-6	-1	6728286	6729379		.				6729581	.				202	.	6729377	14849	16	.				204
chrX	WBGene00002261	ldb-1	1	11028851	11040539	Different TSS	.	11024245	11024245			.	4606	4606			.	11036988	314	0	.	12743	12743
chrII	WBGene00002262	ldh-1	1	11725260	11726469		.	11724627	11724627	11724627	11724627	.	633	633	633	633	.	11725262	891	3	.	635	635	635	635
chrII	WBGene00002264	lec-1	1	13195479	13199533	Same TSS	.	13195376	13195376	13195376	13195376	.	103	103	103	103	.	13195479	9061	13	.	103	103	103	103
chrII	WBGene00002265	lec-2	-1	10009547	10016001	Different TSS	.			10015921	10015921	.			-80	-80	.	10011274	2925	6	.			4647	4647
chrII	WBGene00002266	lec-3	1	9991310	10000287	Different TSS	.		9985300	9987400	9987400	.		6010	3910	3910	.	9991310	1383	2	.		6010	3910	3910
chrIII	WBGene00002267	lec-4	-1	3771403	3773315		.				3773278	.				-37	.	3773308	165	2	.				-30
chrII	WBGene00002268	lec-5	-1	5839617	5841113		.				5841173	.				60	.	5841082	3514	10	.				91
chrIII	WBGene00002269	lec-6	-1	599506	600606		.	600636		600633	600757	.	30		27	151	.	600363	21088	54	.	273		270	394
chrX	WBGene00002270	lec-7	1	9852081	9852933		.			9852148	9852148	.			-67	-67	.				.
chrV	WBGene00002273	lec-10	-1	6488182	6489033		.		6489024	6489024	6489024	.		-9	-9	-9	.	6489101	39	0	.		-77	-77	-77
chrII	WBGene00002275	lem-2	1	14063375	14065829		.		14063290			.		85			.	14063377	631	7	.		87
chrI	WBGene00002276	lem-3	-1	9578516	9581265		.	9581551	9581551	9581264	9581264	.	286	286	-1	-1	.	9581259	470	106	.	292	292	5	5
chrX	WBGene00002280	let-2	-1	16380525	16389297	Same TSS	.	16389296	16389296		16389296	.	-1	-1		-1	.	16389419	16	0	.	-123	-123		-123
chrII	WBGene00002295	let-19	1	8770920	8781966		.		8769647			.		1273			.	8770920	262	0	.		1273
chrII	WBGene00002297	ect-2	-1	10778336	10783230	Same TSS	.		10783308			.		78			.	10783231	116	1	.		77
chrII	WBGene00002299	let-23	1	9197458	9207148	Different TSS	.		9196448			.		1010			.	9197458	51	0	.		1010
chrI	WBGene00002324	let-49	1	14820370	14821754	Different TSS	.	14820342	14820351	14820345	14820351	.	28	19	25	19	.	14820401	312	3	.	59	50	56	50
chrIV	WBGene00002335	let-60	-1	11688204	11691065		.	11692422	11692422	11692312	11692282	.	1357	1357	1247	1217	.	11691063	812	9	.	1359	1359	1249	1219
chrIV	WBGene00002344	let-70	-1	11081063	11082234		.	11082854	11082854	11082854	11082854	.	620	620	620	620	.	11082232	7942	32	.	622	622	622	622
chrI	WBGene00002348	let-75	-1	7258919	7267077		.		7267071		7267071	.		-6		-6	.				.
chrIV	WBGene00002363	let-92	1	11858409	11860439		.	11857336	11857336	11857505	11857497	.	1073	1073	904	912	.	11858419	1998	10	.	1083	1083	914	922
chrIV	WBGene00002368	let-99	1	12567833	12570601		.		12567471		12567732	.		362		101	.	12567813	12	0	.		342		81
chrI	WBGene00002393	lpr-1	1	557434	561674		.				557425	.				9	.				.
chrII	WBGene00002497	let-268	-1	10033248	10039881		.	10039868	10039868		10039868	.	-13	-13		-13	.	10038061	357	0	.	1807	1807		1807
chrV	WBGene00002632	let-413	-1	7972904	7977754	Same TSS	.	7978783	7978784	7978830	7978889	.	1029	1030	1076	1135	.	7977754	1467	0	.	1029	1030	1076	1135
chrV	WBGene00002637	let-418	1	5826816	5832844		.		5825930			.		886			.	5826816	465	2	.		886
chrI	WBGene00002694	let-502	-1	4738251	4744322		.	4745449	4745453			.	1127	1131			.	4744322	1018	3	.	1127	1131
chrIV	WBGene00002827	let-653	1	11885507	11891057	Same TSS	.		11883743		11883743	.		1764		1764	.	11885592	196	0	.		1849		1849
chrIII	WBGene00002845	let-711	1	6946694	6958816		.		6946542		6945853	.		152		841	.	6946726	50	0	.		184		873
chrIII	WBGene00002879	let-754	-1	7949915	7951850		.		7952150		7951849	.		300		-1	.	7951536	1110	5	.		614		313
chrIII	WBGene00002881	let-756	1	6407076	6409965		.		6402677	6402677	6402694	.		4399	4399	4382	.	6407076	159	0	.		4399	4399	4382
chrIII	WBGene00002889	let-765	-1	6592514	6601118		.				6604399	.				3281	.				.
chrII	WBGene00002957	let-858	1	11022310	11027861		.		11022218			.		92			.	11022311	890	5	.		93
chrIV	WBGene00002974	lev-1	-1	13174147	13179359	Same TSS	.		13179309	13179365	13179267	.		-50	6	-92	.	13179127	3	0	.		182	238	140
chrX	WBGene00002975	lev-8	1	11560849	11563642		.				11560690	.				159	.	11560849	28	0	.				159
chrI	WBGene00002978	lev-11	-1	14620748	14631243	Different TSS	.	14631012	14631012	14631012	14631012	.	-231	-231	-231	-231	.	14625424	2074	5	.	5588	5588	5588	5588
chrII	WBGene00002980	lgg-1	-1	6346925	6347689		.	6348483	6348483	6348483	6348483	.	794	794	794	794	.	6347687	24738	907	.	796	796	796	796
chrIV	WBGene00002981	lgg-2	-1	10934170	10935884	Different TSS	.	10936051	10937003	10936051	10936051	.	167	1119	167	167	.	10935882	3378	5	.	169	1121	169	169
chrX	WBGene00002983	lgx-1	-1	5525164	5538481	Same TSS	.				5540889	.				2408	.	5538479	31	0	.				2410
chrV	WBGene00002985	lig-1	1	10814093	10816697	Same TSS	.		10813916		10813916	.		177		177	.	10814093	127	0	.		177		177
chrX	WBGene00002987	lim-4	-1	3869734	3873276		.		3873387			.		111			.	3873527	4	0	.		-140
chrI	WBGene00002989	lim-7	1	5716679	5725359		.	5716590	5716588			.	89	91			.	5716731	8	0	.	141	143
chrX	WBGene00002991	lin-2	-1	12399450	12413957	Different TSS	.	12415896	12415896			.	1939	1939			.	12413967	22	1	.	1929	1929
chrII	WBGene00002994	lin-5	1	7860541	7863511		.	7860547	7860536	7860551	7860544	.	-6	5	-10	-3	.	7860607	1357	4	.	60	71	56	63
chrII	WBGene00002997	lin-8	1	3056644	3060251		.	3055798	3055807	3055807	3055798	.	846	837	837	846	.	3056827	884	2	.	1029	1020	1020	1029
chrIII	WBGene00002998	lin-9	-1	8900157	8904053	Same TSS	.		8904144		8904144	.		91		91	.	8904051	250	1	.		93		93
chrIII	WBGene00003002	lin-13	-1	7700069	7709407		.	7710103	7710095		7710103	.	696	688		696	.	7709424	556	3	.	679	671		679
chrX	WBGene00003003	lin-14	1	11468435	11484202	Different TSS	.	11465525	11465525	11465930	11465525	.	2910	2910	2505	2910	.	11468421	44	0	.	2896	2896	2491	2896
chrI	WBGene00003006	lin-17	1	2706885	2717551	Same TSS	.	2703463	2703463		2703463	.	3422	3422		3422	.	2707601	314	1	.	4138	4138		4138
chrX	WBGene00003007	lin-18	1	3958477	3961886		.				3956086	.				2391	.	3958532	74	1	.				2446
chrII	WBGene00003009	lin-23	1	6371273	6374502		.	6370362	6370436	6370365	6370428	.	911	837	908	845	.	6371273	1028	3	.	911	837	908	845
chrIV	WBGene00003010	lin-24	1	12129482	12135410	Different TSS	.	12128078	12128052		12128081	.	1404	1430		1401	.	12129482	733	2	.	1404	1430		1401
chrV	WBGene00003011	lin-25	1	12649841	12658701		.		12649850			.		-9			.				.
chrI	WBGene00003014	lin-28	-1	8407796	8410798	Different TSS	.				8411326	.				528	.	8410798	333	4	.				528
chrII	WBGene00003015	lin-29	-1	11917579	11935280	Different TSS	.				11935393	.				113	.	11935280	70	0	.				113
chrX	WBGene00003018	lin-32	-1	2229116	2230094		.	2230113	2230113	2230113		.	19	19	19		.	2230088	8	0	.	25	25	25
chrI	WBGene00003020	lin-35	1	5807712	5815640		.		5807603			.		109			.	5807712	1029	3	.		109
chrIII	WBGene00003021	lin-36	-1	8016597	8020805		.	8020999	8020999	8021005	8021020	.	194	194	200	215	.	8020808	545	1	.	191	191	197	212
chrIII	WBGene00003024	lin-39	-1	7528603	7536567		.				7536597	.				30	.				.
chrV	WBGene00003025	lin-40	1	3704982	3712845	Same TSS	.	3703276	3703276	3704140	3703276	.	1706	1706	842	1706	.	3704982	875	140	.	1706	1706	842	1706
chrI	WBGene00003026	lin-41	-1	9335764	9342488	Same TSS	.			9343742	9343742	.			1254	1254	.	9341905	391	5	.			1837	1837
chrIV	WBGene00003030	lin-45	-1	6742527	6748413	Different TSS	.			6756339	6756361	.			7926	7948	.	6747447	296	1	.			8892	8914
chrIV	WBGene00003034	lin-49	1	8620540	8626131		.	8620389	8620389	8620389	8620389	.	151	151	151	151	.	8620670	197	0	.	281	281	281	281
chrI	WBGene00003036	lin-53	-1	9618193	9619754		.	9619920	9619920		9619920	.	166	166		166	.	9619752	2999	22	.	168	168		168
chrI	WBGene00003040	lin-59	-1	3713520	3721160		.	3721444	3721410	3721444	3721444	.	284	250	284	284	.	3721160	535	2	.	284	250	284	284
chrI	WBGene00003041	lin-61	-1	7248826	7251280	Different TSS	.	7251428	7251428		7251428	.	148	148		148	.	7250814	111	1	.	614	614		614
chrIV	WBGene00003043	lip-1	1	6842953	6844955		.	6839316	6839316	6841746	6839316	.	3637	3637	1207	3637	.	6842953	660	3	.	3637	3637	1207	3637
chrII	WBGene00003045	lir-2	1	7667943	7671855	Different TSS	.	7667175				.	768				.	7667943	66	3	.	768
chrII	WBGene00003046	lir-3	-1	11183016	11184750		.	11184975	11185012		11185019	.	225	262		269	.	11184748	113	1	.	227	264		271
chrIII	WBGene00003047	lis-1	-1	13371070	13376609		.		13377244	13377244	13377244	.		635	635	635	.	13376609	545	2	.		635	635	635
chrIII	WBGene00003048	lit-1	1	13701892	13723972	Different TSS	.		13697973	13697973	13697973	.		3919	3919	3919	.	13714471	883	0	.		16498	16498	16498
chrI	WBGene00003052	lmn-1	1	8762982	8765627		.	8762105	8762105	8761677	8762105	.	877	877	1305	877	.	8763035	2716	7	.	930	930	1358	930
chrX	WBGene00003053	lmp-1	-1	6376422	6377651		.	6378517	6378517	6378517	6378517	.	866	866	866	866	.	6377647	5665	11	.	870	870	870	870
chrIII	WBGene00003055	lon-1	1	5474437	5478343	Same TSS	.				5472887	.				1550	.	5474439	2650	2	.				1552
chrV	WBGene00003057	lon-3	-1	12197414	12198606		.				12198584	.				-22	.				.
chrI	WBGene00003062	lpd-6	-1	3144413	3147861		.		3147862			.		1			.	3147795	260	7	.		67
chrIII	WBGene00003063	lpd-7	1	7573281	7575202		.		7573067	7573067	7573067	.		214	214	214	.	7573283	1866	9	.		216	216	216
chrI	WBGene00003068	lrk-1	-1	10879759	10894230		.	10895114	10895114		10895114	.	884	884		884	.	10894230	182	0	.	884	884		884
chrI	WBGene00003071	lrp-1	1	7614172	7634139		.	7608465			7608508	.	5707			5664	.	7614172	119	0	.	5707			5664
chrI	WBGene00003072	lrp-2	-1	3935272	3953945		.	3959596	3959596	3956852	3958527	.	5651	5651	2907	4582	.	3953994	402	0	.	5602	5602	2858	4533
chrV	WBGene00003075	lrx-1	1	12252628	12255375		.	12252693				.	-65				.				.
chrII	WBGene00003076	lsm-1	1	11126874	11127472		.		11126614			.		260			.	11126892	1420	6	.		278
chrII	WBGene00003078	lsm-4	-1	7252189	7253122		.		7253205		7253205	.		83		83	.	7253122	694	0	.		83		83
chrI	WBGene00003080	lsm-6	1	1701360	1701801		.	1701356				.	4				.	1701363	6023	228	.	7
chrI	WBGene00003083	lst-1	1	10588166	10590455	Different TSS	.	10585697	10585697			.	2469	2469			.	10588668	551	0	.	2971	2971
chrX	WBGene00003084	lst-2	-1	4378005	4383341		.	4388886	4388890	4386586	4388890	.	5545	5549	3245	5549	.	4383341	146	0	.	5545	5549	3245	5549
chrIV	WBGene00003085	lst-3	1	14071350	14076719	Same TSS	.	14071143	14071143	14071143	14071143	.	207	207	207	207	.	14071525	1174	3	.	382	382	382	382
chrIV	WBGene00003086	lst-4	-1	14060980	14069831	Different TSS	.	14071024	14071024	14071022	14070740	.	1193	1193	1191	909	.	14069829	459	3	.	1195	1195	1193	911
chrX	WBGene00003087	lsy-2	1	2089660	2093240	Different TSS	.	2089679	2089679	2089665	2089679	.	-19	-19	-5	-19	.	2089999	162	0	.	320	320	334	320
chrII	WBGene00003089	ltd-1	-1	8088442	8092702		.		8094406			.		1704			.	8092702	84	0	.		1704
chrV	WBGene00003090	lys-1	1	10277802	10279102		.	10277802	10277802	10277802	10277802	.	0	0	0	0	.	10277879	14712	30	.	77	77	77	77
chrV	WBGene00003091	lys-2	-1	10280285	10281445		.				10281443	.				-2	.	10281518	5	0	.				-75
chrV	WBGene00003092	lys-3	-1	10282179	10283423		.				10283429	.				6	.				.
chrIV	WBGene00003093	lys-4	-1	11621420	11623101		.				11623089	.				-12	.				.
chrII	WBGene00003097	lys-8	1	5586148	5587635		.				5586008	.				140	.	5586161	2948	7	.				153
chrIII	WBGene00003102	mab-5	-1	7776842	7783389		.	7784413	7786792	7784389	7792275	.	1024	3403	1000	8886	.	7783390	447	1	.	1023	3402	999	8885
chrX	WBGene00003104	mab-7	-1	892240	898068		.				898067	.				-1	.				.
chrII	WBGene00003106	mab-9	1	516014	521622		.	516019				.	-5				.				.
chrII	WBGene00003107	mab-10	1	10530349	10533446		.				10529440	.				909	.	10530277	90	0	.				837
chrI	WBGene00003111	mab-20	-1	1644590	1651382	Same TSS	.	1651379	1651386	1651379	1651386	.	-3	4	-3	4	.	1651884	3	0	.	-505	-498	-505	-498
chrIII	WBGene00003112	mab-21	1	4600705	4603019		.		4600707		4600707	.		-2		-2	.				.
chrII	WBGene00003119	mac-1	-1	13311146	13320841		.	13321407				.	566				.	13320841	6	81	.	566
chrI	WBGene00003132	mat-1	-1	5123929	5127205	Same TSS	.	5127616	5127616	5127615	5127615	.	411	411	410	410	.	5127202	762	4	.	414	414	413	413
chrI	WBGene00003136	mau-2	1	8125794	8130081		.		8124775			.		1019			.	8125796	151	0	.		1021
chrIV	WBGene00003148	mbf-1	-1	11479336	11480163		.	11480541	11480541	11480541	11480541	.	378	378	378	378	.	11480163	3988	14	.	378	378	378	378
chrX	WBGene00003149	mbk-1	-1	14819844	14824471		.	14824759	14824759	14824698	14824759	.	288	288	227	288	.	14824471	441	2	.	288	288	227	288
chrIV	WBGene00003151	mca-1	-1	9625893	9634931	Different TSS	.	9635749	9635763			.	818	832			.	9634931	536	0	.	818	832
chrIV	WBGene00003153	mca-3	-1	3103531	3133141	Same TSS	.			3135005	3135005	.			1864	1864	.	3133139	584	1	.			1866	1866
chrV	WBGene00003155	mcm-3	-1	15056702	15059584		.		15059710		15059740	.		126		156	.	15059582	717	6	.		128		158
chrI	WBGene00003156	mcm-4	-1	2318293	2321849		.		2321914		2321914	.		65		65	.	2321819	2107	5	.		95		95
chrIII	WBGene00003157	mcm-5	-1	4288233	4291256		.		4291411	4291411	4291411	.		155	155	155	.	4291239	1831	8	.		172	172	172
chrIII	WBGene00003158	mcm-6	1	9794281	9798558	Different TSS	.		9794168	9794168	9794168	.		113	113	113	.	9794281	984	13	.		113	113	113
chrV	WBGene00003159	mcm-7	1	4347150	4349761		.	4347066	4347066		4347040	.	84	84		110	.	4347152	2352	5	.	86	86		112
chrV	WBGene00003160	mdf-1	-1	9541758	9544202		.	9544344	9544344		9544339	.	142	142		137	.	9544202	342	11	.	142	142		137
chrIV	WBGene00003161	mdf-2	-1	2636229	2641115	Same TSS	.	2641090	2641090		2641090	.	-25	-25		-25	.	2641022	2119	7	.	68	68		68
chrIII	WBGene00003162	mdh-2	-1	6606197	6608060		.		6608228			.		168			.	6608053	8802	8	.		175
chrX	WBGene00003163	mdl-1	1	6742354	6743863		.	6742360	6742360	6742360	6742360	.	-6	-6	-6	-6	.				.
chrX	WBGene00003166	mec-2	1	5575897	5590780	Different TSS	.			5575880	5575880	.			17	17	.	5582377	2	0	.			6497	6497
chrI	WBGene00003170	mec-6	1	6724918	6728331		.	6724922	6724923			.	-4	-5			.	6725165	30	0	.	243	242
chrX	WBGene00003171	mec-7	-1	7774805	7776631		.	7776607	7776607	7776607	7776607	.	-24	-24	-24	-24	.				.
chrIII	WBGene00003175	mec-12	-1	3131566	3139213		.		3139195	3139195	3139195	.		-18	-18	-18	.				.
chrI	WBGene00003182	mef-2	1	9095950	9100179		.	9095832		9095856	9092540	.	118		94	3410	.	9095950	210	0	.	118		94	3410
chrI	WBGene00003183	mei-1	1	8294872	8296976	Same TSS	.	8294084	8294084		8294084	.	788	788		788	.	8294874	414	4	.	790	790		790
chrX	WBGene00003185	mek-1	1	7479201	7480955	Same TSS	.	7478600	7478600	7478610	7478666	.	601	601	591	535	.	7479203	698	3	.	603	603	593	537
chrII	WBGene00003196	mel-11	1	9358472	9369040	Same TSS	.	9356990	9356994	9356990	9357006	.	1482	1478	1482	1466	.	9358474	285	137	.	1484	1480	1484	1468
chrI	WBGene00003209	mel-26	1	9132531	9135742		.	9129014	9129021	9127900	9129014	.	3517	3510	4631	3517	.	9132531	1536	11	.	3517	3510	4631	3517
chrIV	WBGene00003218	mep-1	1	11524620	11527929		.	11523946	11523946	11523936	11522454	.	674	674	684	2166	.	11524620	1282	76	.	674	674	684	2166
chrIII	WBGene00003234	mif-1	1	11847802	11849934		.		11847758	11847758		.		44	44		.	11848052	1259	0	.		294	294
chrV	WBGene00003235	mif-2	-1	11976755	11978385	Different TSS	.			11978358		.			-27		.	11978236	933	281	.			122
chrIV	WBGene00003237	mif-4	-1	6335220	6336036		.	6336873	6336873	6336171	6336868	.	837	837	135	832	.	6335983	126	0	.	890	890	188	885
chrI	WBGene00003238	mig-1	-1	948569	957376	Same TSS	.	957384	957384	957375	957375	.	8	8	-1	-1	.	957351	3	0	.	33	33	24	24
chrX	WBGene00003239	mig-2	1	11548542	11550634		.	11546838	11546838		11546778	.	1704	1704		1764	.	11548542	304	4	.	1704	1704		1764
chrII	WBGene00003241	mig-5	-1	8182269	8184971	Same TSS	.		8185073		8185073	.		102		102	.	8184969	540	3	.		104		104
chrV	WBGene00003242	mig-6	1	7827213	7842365	Same TSS	.	7826726	7826726	7826726	7826726	.	487	487	487	487	.	7827271	820	1	.	545	545	545	545
chrIII	WBGene00003243	mig-10	1	8279037	8305761	Different TSS	.		8278108			.		929			.	8300124	210	0	.		22016
chrX	WBGene00003245	mig-13	-1	4796059	4800098	Different TSS	.		4802244			.		2146			.	4799616	75	0	.		2628
chrII	WBGene00003246	mig-14	1	13741673	13749911		.				13741431	.				242	.	13741675	82	0	.				244
chrX	WBGene00003247	mig-15	-1	10421595	10428590	Same TSS	.	10435450	10435450		10430856	.	6860	6860		2266	.	10428590	213	0	.	6860	6860		2266
chrV	WBGene00003248	mig-17	1	11446634	11449228		.	11446644	11446644			.	-10	-10			.				.
chrIII	WBGene00003253	mig-22	-1	8763210	8767261	Different TSS	.		8767951			.		690			.	8767254	435	0	.		697
chrII	WBGene00003367	mix-1	1	10824236	10841763		.		10824234		10824234	.		2		2	.	10824313	26	0	.		79		79
chrX	WBGene00003368	mkk-4	1	10027798	10030071		.	10026458	10026456		10026582	.	1340	1342		1216	.	10027798	130	1	.	1340	1342		1216
chrX	WBGene00003369	mlc-1	1	17459086	17460693		.	17459087	17459087		17459118	.	-1	-1		-32	.				.
chrX	WBGene00003370	mlc-2	-1	17455705	17456520		.	17456679	17456676	17456676	17456676	.	159	156	156	156	.	17456512	10664	51	.	167	164	164	164
chrIII	WBGene00003371	mlc-3	1	5564985	5567344	Same TSS	.	5564990	5564990	5564990	5564995	.	-5	-5	-5	-10	.	5564798	2	0	.	-192	-192	-192	-197
chrIII	WBGene00003372	mlc-4	-1	3392002	3393783		.		3395297	3395243		.		1514	1460		.	3393776	4662	11	.		1521	1467
chrV	WBGene00003374	mlk-1	-1	5056364	5064788	Same TSS	.	5065159	5065122	5065159	5065159	.	371	334	371	371	.	5064788	572	1	.	371	334	371	371
chrIII	WBGene00003375	mlp-1	-1	5971481	5973615	Same TSS	.	5976098	5975411		5976098	.	2483	1796		2483	.	5973614	2928	4	.	2484	1797		2484
chrIII	WBGene00003378	mml-1	-1	7370066	7374660	Same TSS	.	7376466	7376466	7374966	7375551	.	1806	1806	306	891	.	7374666	79	0	.	1800	1800	300	885
chrX	WBGene00003384	moc-1	-1	10136068	10138560		.	10138739	10138735		10138735	.	179	175		175	.	10138561	261	0	.	178	174		174
chrV	WBGene00003386	mod-1	-1	8909703	8914013	Same TSS	.				8914556	.				543	.	8914011	23	0	.				545
chrII	WBGene00003388	moe-3	-1	13160345	13165663		.			13165993		.			330		.	13165663	147	0	.			330
chrV	WBGene00003395	mom-2	1	8355968	8358168		.	8356040	8356045			.	-72	-77			.	8355968	188	1	.	-72	-77
chrI	WBGene00003396	mom-4	-1	9895683	9900810		.	9900654	9900642	9900642	9900652	.	-156	-168	-168	-158	.	9900808	399	0	.	-154	-166	-166	-156
chrI	WBGene00003397	mom-5	1	9965578	9969403		.			9963868	9963868	.			1710	1710	.	9965570	328	2	.			1702	1702
chrII	WBGene00003403	mps-1	-1	6292621	6294120		.			6294321	6294321	.			201	201	.				.
chrIII	WBGene00003406	mrg-1	-1	12871167	12874554	Same TSS	.		12874729		12874729	.		175		175	.	12874553	1076	5	.		176		176
chrX	WBGene00003407	mrp-1	-1	576319	587483	Different TSS	.	593307	593307			.	5824	5824			.	587483	105	0	.	5824	5824
chrX	WBGene00003410	mrp-4	1	9884220	9889646		.	9882417				.	1803				.	9884222	226	2	.	1805
chrX	WBGene00003411	mrp-5	-1	14938182	14946249	Same TSS	.	14946775	14946751	14946751	14946751	.	526	502	502	502	.	14946247	1154	3	.	528	504	504	504
chrIV	WBGene00003421	msh-5	1	13155204	13164028		.		13154514			.		690			.	13155204	28	0	.		690
chrIII	WBGene00003423	msi-1	-1	3965147	3976377		.			3978451	3980448	.			2074	4071	.	3976371	334	1	.			2080	4077
chrI	WBGene00003475	mtm-1	1	5134742	5137977		.	5134696	5134696		5134696	.	46	46		46	.	5134744	292	31	.	48	48		48
chrIII	WBGene00003476	mtm-3	-1	3789964	3800447	Same TSS	.	3801326	3801322	3801418	3801322	.	879	875	971	875	.	3800447	670	6	.	879	875	971	875
chrX	WBGene00003477	mtm-5	-1	5234637	5243462		.		5244162			.		700			.	5243374	230	1	.		788
chrIII	WBGene00003478	mtm-6	1	13346984	13356266	Same TSS	.		13346862			.		122			.	13351292	129	0	.		4430
chrV	WBGene00003479	mtm-9	1	3743563	3749420	Same TSS	.				3743295	.				268	.	3743563	144	4	.				268
chrII	WBGene00003480	klf-3	1	6618186	6622138	Different TSS	.		6617939		6615431	.		247		2755	.	6618186	237	0	.		247		2755
chrIII	WBGene00003482	mua-3	1	10160599	10183440	Different TSS	.	10160521	10160521			.	78	78			.				.
chrX	WBGene00003485	mua-6	-1	16262222	16265614		.				16265909	.				295	.	16265613	1126	1	.				296
chrX	WBGene00003495	mup-2	-1	6408427	6410322		.	6410311	6410311	6410311	6410311	.	-11	-11	-11	-11	.	6410190	6562	13	.	121	121	121	121
chrI	WBGene00003499	mut-2	-1	6356619	6358412	Same TSS	.		6358545			.		133			.	6358405	336	2	.		140
chrI	WBGene00003508	mut-16	1	10080141	10086280	Same TSS	.	10079699	10079695			.	442	446			.	10080148	1295	5	.	449	453
chrX	WBGene00003511	mxl-3	-1	13349571	13350737		.	13350893	13350893	13350893	13350893	.	156	156	156	156	.	13350735	1672	6	.	158	158	158	158
chrX	WBGene00003514	myo-2	1	12467993	12475273		.	12467998	12467998	12467998	12467998	.	-5	-5	-5	-5	.	12468073	1	0	.	75	75	75	75
chrV	WBGene00003515	myo-3	-1	12226797	12234324		.	12234758	12234758	12234733	12234764	.	434	434	409	440	.	12234324	164	0	.	434	434	409	440
chrI	WBGene00003516	nab-1	1	4229578	4236040	Different TSS	.	4225109	4225109		4225109	.	4469	4469		4469	.	4229578	197	0	.	4469	4469		4469
chrX	WBGene00003517	nac-1	1	14895076	14898372		.	14894537				.	539				.	14895076	155	0	.	539
chrIII	WBGene00003519	nac-3	1	10152704	10157829	Different TSS	.	10151950		10151950	10151950	.	754		754	754	.	10152704	262	0	.	754		754	754
chrIV	WBGene00003527	nas-8	1	7114936	7119902		.			7114908	7114933	.			28	3	.	7115592	2	0	.			684	659
chrX	WBGene00003534	nas-15	1	777718	780513		.				776255	.				1463	.	777720	194	0	.				1465
chrV	WBGene00003549	nas-31	-1	10918842	10921817	Same TSS	.			10921813	10921813	.			-4	-4	.				.
chrIII	WBGene00003559	ncl-1	1	7731322	7737641		.	7730595	7730595		7729944	.	727	727		1378	.	7731324	1080	5	.	729	729		1380
chrX	WBGene00003561	ncr-1	-1	4472259	4480091		.			4480090	4480092	.			-1	1	.	4480065	9	0	.			25	27
chrI	WBGene00003564	ncs-2	-1	10033532	10034813		.		10037547	10040149	10040143	.		2734	5336	5330	.	10034805	2676	6	.		2742	5344	5338
chrX	WBGene00003565	ncs-3	1	1054211	1056686		.				1051261	.				2950	.				.
chrV	WBGene00003566	ncx-1	-1	20105601	20120644	Same TSS	.				20122756	.				2112	.	20120642	886	1	.				2114
chrV	WBGene00003567	ncx-2	1	5303671	5311230	Different TSS	.	5302886	5302886			.	785	785			.	5303673	313	2	.	787	787
chrIV	WBGene00003568	ncx-3	1	10716636	10721735		.	10714833	10714833			.	1803	1803			.	10716628	141	1	.	1795	1795
chrI	WBGene00003569	ncx-4	1	9808895	9813066	Different TSS	.			9805515	9805390	.			3380	3505	.	9808895	144	0	.			3380	3505
chrIV	WBGene00003576	ndc-80	1	10086114	10088413		.		10085919			.		195			.	10086116	544	6	.		197
chrIII	WBGene00003577	ndg-4	-1	4462799	4467346	Same TSS	.	4468749	4468748			.	1403	1402			.	4467346	318	1	.	1403	1402
chrI	WBGene00003578	ndx-1	1	12679201	12681805		.		12678769		12678769	.		432		432	.	12679197	467	1	.		428		428
chrI	WBGene00003587	ned-8	-1	10373361	10374291		.	10374281	10374281			.	-10	-10			.	10373853	7233	16	.	428	428
chrIII	WBGene00003588	nex-1	1	5225582	5226765		.				5225107	.				475	.	5225584	5722	10	.				477
chrIII	WBGene00003589	nex-2	-1	10325542	10330328	Different TSS	.	10331101		10331055	10331053	.	773		727	725	.	10330328	728	7	.	773		727	725
chrV	WBGene00003591	nex-4	1	4855311	4857246		.			4855228		.			83		.	4855311	51	0	.			83
chrII	WBGene00003592	nfi-1	1	7538146	7542957	Different TSS	.	7537808	7537808	7537572	7537808	.	338	338	574	338	.	7538146	130	2	.	338	338	574	338
chrIII	WBGene00003593	nfm-1	1	6159790	6164521	Same TSS	.		6159440			.		350			.	6159792	201	0	.		352
chrIV	WBGene00003595	ngn-1	-1	2626130	2628228		.	2628256	2628256			.	28	28			.				.
chrIII	WBGene00003597	nhl-1	-1	9147312	9153812		.	9153836	9153830	9153836	9153836	.	24	18	24	24	.	9153718	1	0	.	118	112	118	118
chrIII	WBGene00003598	nhl-2	-1	4894611	4899049		.	4899796	4899796	4899805	4899805	.	747	747	756	756	.	4899043	289	2	.	753	753	762	762
chrII	WBGene00003599	nhl-3	-1	595203	602127	Different TSS	.	604206	604206			.	2079	2079			.	602127	80	0	.	2079	2079
chrX	WBGene00003600	nhr-1	1	17518370	17527484	Same TSS	.	17513781	17513684	17513781	17516992	.	4589	4686	4589	1378	.	17518370	723	1	.	4589	4686	4589	1378
chrI	WBGene00003601	nhr-2	-1	5818482	5821111		.	5821258	5821258			.	147	147			.	5821118	383	2	.	140	140
chrX	WBGene00003602	nhr-3	1	14558432	14561357		.	14557564	14557564	14557564	14557564	.	868	868	868	868	.	14558434	298	0	.	870	870	870	870
chrIV	WBGene00003603	nhr-4	1	9879308	9882122		.			9878748		.			560		.	9879308	117	0	.			560
chrIV	WBGene00003604	nhr-5	1	15400301	15407128		.			15398943		.			1358		.	15400254	79	0	.			1311
chrIII	WBGene00003605	nhr-6	1	3573572	3578759	Different TSS	.				3567047	.				6525	.	3573574	13	0	.				6527
chrIV	WBGene00003607	nhr-8	1	7710977	7714670	Same TSS	.		7711132			.		-155			.				.
chrIII	WBGene00003609	nhr-10	-1	7112238	7115378		.	7116697	7116697	7116697	7116730	.	1319	1319	1319	1352	.	7115376	167	0	.	1321	1321	1321	1354
chrIV	WBGene00003610	nhr-11	1	9069995	9073592	Different TSS	.		9069649			.		346			.	9069995	41	1	.		346
chrV	WBGene00003611	nhr-12	-1	10082116	10084018	Same TSS	.	10084146	10084146		10084146	.	128	128		128	.	10084018	35	1	.	128	128		128
chrV	WBGene00003612	nhr-13	1	2192496	2196825	Same TSS	.		2192385		2192405	.		111		91	.	2192496	114	1	.		111		91
chrX	WBGene00003613	nhr-14	-1	8473670	8476123	Same TSS	.	8476255	8477426	8477426	8477228	.	132	1303	1303	1105	.	8476123	271	0	.	132	1303	1303	1105
chrX	WBGene00003616	nhr-17	-1	12663724	12667782		.			12668075		.			293		.	12667782	210	2	.			293
chrII	WBGene00003618	nhr-19	-1	9598137	9605466		.			9606762	9606487	.			1296	1021	.	9605188	22	0	.			1574	1299
chrIII	WBGene00003619	nhr-20	-1	4230407	4233192		.	4237686	4237683	4237686	4237683	.	4494	4491	4494	4491	.	4233192	193	2	.	4494	4491	4494	4491
chrII	WBGene00003620	nhr-21	1	7339188	7349433	Different TSS	.	7337805	7337805	7337805	7337805	.	1383	1383	1383	1383	.	7339188	257	0	.	1383	1383	1383	1383
chrII	WBGene00003621	nhr-22	-1	6446113	6449775		.	6449768	6449774		6449768	.	-7	-1		-7	.	6449689	96	3	.	79	85		79
chrI	WBGene00003622	nhr-23	1	7214743	7221346	Different TSS	.	7214944	7214944		7214944	.	-201	-201		-201	.	7218784	339	1	.	3840	3840		3840
chrX	WBGene00003623	nhr-25	1	13008424	13013892	Different TSS	.			13008260		.			164		.	13008817	64	0	.			557
chrX	WBGene00003624	nhr-28	1	16354904	16359582	Different TSS	.		16349177		16350129	.		5727		4775	.	16354904	102	0	.		5727		4775
chrIV	WBGene00003625	nhr-31	-1	8022844	8029500	Different TSS	.	8036411		8031293	8031291	.	6911		1793	1791	.	8029500	407	0	.	6911		1793	1791
chrX	WBGene00003626	nhr-32	1	13251895	13256152		.	13251694	13251694	13251694	13251694	.	201	201	201	201	.	13251895	258	0	.	201	201	201	201
chrIV	WBGene00003627	nhr-34	-1	9664345	9675655	Different TSS	.			9677632		.			1977		.	9675655	180	0	.			1977
chrX	WBGene00003628	nhr-35	1	4532663	4537506	Same TSS	.	4532307	4532307	4532307	4532487	.	356	356	356	176	.	4532824	464	0	.	517	517	517	337
chrX	WBGene00003630	nhr-40	1	2593996	2606724	Same TSS	.	2591807	2591808	2591109	2591807	.	2189	2188	2887	2189	.	2593996	116	1	.	2189	2188	2887	2189
chrV	WBGene00003632	nhr-42	1	6998801	7000626		.			6998734		.			67		.	6998801	304	1	.			67
chrIV	WBGene00003633	nhr-43	1	11899660	11902888		.	11899365	11899365		11899365	.	295	295		295	.	11899639	163	0	.	274	274		274
chrV	WBGene00003634	nhr-44	-1	8961880	8964077		.		8964185			.		108			.	8964077	63	0	.		108
chrIV	WBGene00003636	nhr-46	-1	5747371	5757851	Different TSS	.			5765782	5770506	.			7931	12655	.	5749879	313	0	.			15903	20627
chrV	WBGene00003637	nhr-47	1	5505280	5509940		.	5505296	5505296	5505296	5505270	.	-16	-16	-16	10	.				.
chrX	WBGene00003638	nhr-48	1	15708153	15716345	Same TSS	.	15707698	15707698	15706358	15707725	.	455	455	1795	428	.	15708151	207	2	.	453	453	1793	426
chrI	WBGene00003639	nhr-49	1	9869654	9874667	Different TSS	.	9869385	9869390	9869385	9869385	.	269	264	269	269	.	9871219	292	148	.	1834	1829	1834	1834
chrV	WBGene00003640	nhr-50	-1	15997759	16000633	Same TSS	.		16000586		16000586	.		-47		-47	.	15999640	27	0	.		946		946
chrV	WBGene00003645	nhr-55	1	478163	480714		.				477981	.				182	.	478163	142	0	.				182
chrV	WBGene00003646	nhr-56	1	2219063	2221299	Same TSS	.	2219123	2219123	2219149	2219123	.	-60	-60	-86	-60	.				.
chrV	WBGene00003647	nhr-57	1	4131910	4134930		.	4131890	4131726	4131723	4131890	.	20	184	187	20	.	4131909	18	0	.	19	183	186	19
chrV	WBGene00003648	nhr-58	1	532290	534048	Different TSS	.	532285	532322			.	5	-32			.				.
chrI	WBGene00003652	nhr-62	1	9839589	9844801	Different TSS	.	9839626	9839626	9839626	9839626	.	-37	-37	-37	-37	.	9839589	287	1	.	-37	-37	-37	-37
chrI	WBGene00003654	nhr-64	1	3104365	3109544	Different TSS	.		3101959		3103253	.		2406		1112	.	3104365	71	0	.		2406		1112
chrIV	WBGene00003656	nhr-66	-1	8226327	8236588	Different TSS	.	8241410	8241410	8241410	8241410	.	4822	4822	4822	4822	.	8236588	399	2	.	4822	4822	4822	4822
chrIV	WBGene00003657	nhr-67	1	11169813	11174764		.	11169715	11169715		11169715	.	98	98		98	.				.
chrV	WBGene00003658	nhr-68	1	11573420	11575851		.		11573100		11573100	.		320		320	.	11573422	569	0	.		322		322
chrI	WBGene00003659	nhr-69	-1	9879180	9881495		.			9883375		.			1880		.	9881493	702	0	.			1882
chrX	WBGene00003661	nhr-71	1	13747247	13751709	Same TSS	.	13743589	13743594	13739822	13739822	.	3658	3653	7425	7425	.	13747247	202	0	.	3658	3653	7425	7425
chrIII	WBGene00003670	nhr-80	-1	12166	14801	Same TSS	.				15383	.				582	.	14978	3	0	.				405
chrV	WBGene00003674	nhr-84	-1	15876713	15879548		.		15881006	15880992	15880198	.		1458	1444	650	.	15879587	255	0	.		1419	1405	611
chrI	WBGene00003675	nhr-85	-1	13056080	13062111	Different TSS	.			13062664	13062788	.			553	677	.	13062111	177	0	.			553	677
chrV	WBGene00003676	nhr-86	-1	2061110	2066843		.	2066922	2066929	2068113	2068097	.	79	86	1270	1254	.	2066843	98	1	.	79	86	1270	1254
chrIV	WBGene00003677	nhr-87	1	1624063	1626702		.	1624017	1624017	1624017	1624017	.	46	46	46	46	.	1624064	20	0	.	47	47	47	47
chrII	WBGene00003678	nhr-88	1	2976642	2986018	Same TSS	.			2976698	2976698	.			-56	-56	.	2978419	577	0	.			1721	1721
chrX	WBGene00003681	nhr-91	1	15309305	15314830	Different TSS	.	15307946	15307946		15307946	.	1359	1359		1359	.	15309306	168	1	.	1360	1360		1360
chrIV	WBGene00003687	nhr-97	1	9757628	9764467	Different TSS	.	9757322	9757348	9757348	9757348	.	306	280	280	280	.	9757628	1588	2	.	306	280	280	280
chrV	WBGene00003688	nhr-98	1	454385	456773		.		454420			.		-35			.				.
chrV	WBGene00003689	nhr-99	1	474810	477151		.				474768	.				42	.				.
chrV	WBGene00003691	nhr-101	1	11570418	11572314		.			11570397	11570461	.			21	-43	.	11570464	69	1	.			67	3
chrIV	WBGene00003694	nhr-104	-1	4784467	4788506	Same TSS	.	4788486	4788485			.	-20	-21			.	4788443	5	0	.	43	42
chrIV	WBGene00003695	nhr-105	1	7050091	7053424	Same TSS	.	7048094	7048094	7048126	7048126	.	1997	1997	1965	1965	.	7050145	619	1	.	2051	2051	2019	2019
chrI	WBGene00003703	nhr-113	-1	11473208	11475652		.				11475651	.				-1	.				.
chrV	WBGene00003704	nhr-114	1	4187171	4189992	Same TSS	.	4186813		4187107	4187102	.	358		64	69	.	4187189	239	1	.	376		82	87
chrII	WBGene00003709	nhr-119	-1	2794943	2800600		.		2800895	2805006	2800895	.		295	4406	295	.	2800603	50	2	.		292	4403	292
chrX	WBGene00003710	nhr-120	-1	6636522	6640583		.			6642939	6642939	.			2356	2356	.	6640583	118	0	.			2356	2356
chrV	WBGene00003717	nhr-127	1	16261627	16263871		.		16261094			.		533			.				.
chrV	WBGene00003720	nhr-130	-1	480841	483349		.				483590	.				241	.	483340	304	1	.				250
chrV	WBGene00003721	nhr-131	1	494586	497288		.				494578	.				8	.	494634	18	0	.				56
chrV	WBGene00003722	nhr-132	1	534452	536168		.			534459	534466	.			-7	-14	.				.
chrV	WBGene00003723	nhr-133	-1	2210515	2212101		.				2212102	.				1	.				.
chrV	WBGene00003725	nhr-135	-1	7091697	7093734		.	7093950	7093950	7093950	7093950	.	216	216	216	216	.	7093712	161	1	.	238	238	238	238
chrV	WBGene00003726	nhr-136	1	12107123	12109118		.	12107138	12107138	12107138	12107138	.	-15	-15	-15	-15	.				.
chrX	WBGene00003727	nhr-137	-1	6661755	6668967	Different TSS	.		6668966		6669068	.		-1		101	.				.
chrIV	WBGene00003728	nhr-138	1	9725232	9728549		.	9718578	9718539	9718539	9718539	.	6654	6693	6693	6693	.	9725232	124	0	.	6654	6693	6693	6693
chrII	WBGene00003730	nhx-2	-1	7690656	7693906		.				7695734	.				1828	.	7693906	158	3	.				1828
chrX	WBGene00003733	nhx-5	1	10576898	10580992	Same TSS	.	10577013	10577013		10577013	.	-115	-115		-115	.	10576898	233	1	.	-115	-115		-115
chrI	WBGene00003735	nhx-8	1	12825677	12834133	Different TSS	.	12825674	12825674		12825674	.	3	3		3	.	12828392	236	0	.	2718	2718		2718
chrV	WBGene00003738	nid-1	1	12910097	12917205	Same TSS	.		12909024			.		1073			.	12910097	223	0	.		1073
chrX	WBGene00003741	nlp-3	-1	13177785	13178385		.	13178481		13178481	13178481	.	96		96	96	.	13178378	207	0	.	103		103	103
chrX	WBGene00003744	nlp-6	1	17662376	17665281	Same TSS	.	17662271		17662271	17662271	.	105		105	105	.	17662382	847	0	.	111		111	111
chrV	WBGene00003747	nlp-9	1	4219629	4222170	Same TSS	.			4218492		.			1137		.	4219629	117	1	.			1137
chrII	WBGene00003749	nlp-11	-1	9689599	9691882		.				9692081	.				199	.	9691880	868	1	.				201
chrV	WBGene00003751	nlp-13	1	4236404	4238088		.			4236123	4236123	.			281	281	.	4236404	1120	1	.			281	281
chrX	WBGene00003752	nlp-14	-1	8917368	8919436	Same TSS	.				8919503	.				67	.	8919370	285	1	.				133
chrI	WBGene00003753	nlp-15	1	12988220	12995462		.			12988219	12988219	.			1	1	.				.
chrIV	WBGene00003754	nlp-16	-1	6255101	6259831		.			6259850	6259845	.			19	14	.	6259808	57	0	.			42	37
chrII	WBGene00003756	nlp-18	-1	11027905	11030345		.			11030409	11030409	.			64	64	.	11030338	1784	3	.			71	71
chrIV	WBGene00003758	nlp-20	-1	7642046	7643114		.			7643124	7643124	.			10	10	.	7643066	45	0	.			58	58
chrIII	WBGene00003759	nlp-21	-1	11388530	11393160	Same TSS	.	11393159		11393159	11393159	.	-1		-1	-1	.	11393119	51	0	.	40		40	40
chrV	WBGene00003762	nlp-24	1	11616265	11616869		.			11616264	11616264	.			1	1	.	11616358	3922	11	.			94	94
chrV	WBGene00003763	nlp-25	1	19607481	19608380		.				19607401	.				80	.	19607467	388	0	.				66
chrV	WBGene00003766	nlp-28	1	3987885	3988299		.			3987884		.			1		.	3987839	1	0	.			-45
chrV	WBGene00003767	nlp-29	1	3984398	3984834		.			3984397	3984397	.			1	1	.				.
chrV	WBGene00003769	nlp-31	1	3980040	3980602		.	3980124	3980124		3980124	.	-84	-84		-84	.				.
chrV	WBGene00003771	nlp-33	1	11147326	11147792		.	11147327	11147327	11147327	11147327	.	-1	-1	-1	-1	.				.
chrII	WBGene00003773	nlt-1	-1	10000274	10001083		.	10001228	10001228	10001228	10001228	.	145	145	145	145	.	10001051	2881	3	.	177	177	177	177
chrX	WBGene00003776	nmy-1	1	2909546	2918027		.	2904364	2904371	2904371	2904364	.	5182	5175	5175	5182	.	2909528	292	1	.	5164	5157	5157	5164
chrI	WBGene00003777	nmy-2	-1	7926618	7934572		.			7935607	7935614	.			1035	1042	.	7934572	825	1	.			1035	1042
chrX	WBGene00003778	nnt-1	1	6122280	6127506		.			6122025	6122032	.			255	248	.	6122286	81	0	.			261	254
chrII	WBGene00003785	nos-3	1	9746659	9749913	Same TSS	.	9746280	9746254	9746254	9746254	.	379	405	405	405	.	9746658	1252	2	.	378	404	404	404
chrIV	WBGene00003787	npp-1	1	9858466	9862098	Different TSS	.		9858348			.		118			.	9858468	1297	13	.		120
chrII	WBGene00003789	npp-3	-1	11865460	11874651		.	11874743	11874736	11874743	11874736	.	92	85	92	85	.	11874640	291	1	.	103	96	103	96
chrI	WBGene00003793	npp-7	1	5691841	5697453		.		5691840			.		1			.	5692267	343	0	.		427
chrIV	WBGene00003794	npp-8	-1	1567896	1595823	Different TSS	.		1595937	1595958	1595937	.		114	135	114	.	1595823	362	1	.		114	135	114
chrIII	WBGene00003795	npp-9	-1	3400630	3404468	Same TSS	.		3404558		3404557	.		90		89	.	3404265	2225	8	.		293		292
chrIII	WBGene00003796	npp-10	-1	6013446	6019503	Same TSS	.	6019833	6019833	6019833	6019833	.	330	330	330	330	.				.
chrI	WBGene00003797	npp-11	1	3817999	3821506		.	3817956	3817956	3817491	3817956	.	43	43	508	43	.	3818077	1902	9	.	121	121	586	121
chrI	WBGene00003798	npp-12	1	6447311	6453951		.		6447137		6447136	.		174		175	.	6447313	855	3	.		176		177
chrI	WBGene00003800	npp-14	-1	9660166	9665135		.		9665145		9665125	.		10		-10	.	9664906	370	2	.		239		219
chrIII	WBGene00003802	npp-16	1	11915791	11917770	Same TSS	.	11915813	11915813		11915813	.	-22	-22		-22	.	11915828	53	0	.	15	15		15
chrIII	WBGene00003804	npp-18	1	13296750	13299017		.		13296422			.		328			.	13296752	456	3	.		330
chrII	WBGene00003805	npp-19	-1	10796527	10798422	Same TSS	.	10798556	10798556	10798556	10798556	.	134	134	134	134	.	10798420	1450	2	.	136	136	136	136
chrIV	WBGene00003806	npp-20	-1	1490655	1496019	Same TSS	.		1496072		1496072	.		53		53	.	1496013	609	2	.		59		59
chrV	WBGene00003812	nrf-5	1	13828194	13831026		.	13828137	13828137		13828137	.	57	57		57	.	13828253	239	0	.	116	116		116
chrI	WBGene00003815	nars-1	-1	7088021	7090070		.		7090262			.		192			.	7090061	2414	11	.		201
chrII	WBGene00003821	nst-1	-1	8280805	8283160		.	8283326	8283324	8283324	8283324	.	166	164	164	164	.	8283158	1074	9	.	168	166	166	166
chrII	WBGene00003822	nsy-1	1	5022756	5029974		.	5017522	5017498	5017569	5017498	.	5234	5258	5187	5258	.	5022756	492	1	.	5234	5258	5187	5258
chrII	WBGene00003825	ntl-2	-1	4372744	4376745	Different TSS	.	4376732	4376702	4376732	4376732	.	-13	-43	-13	-13	.	4376461	1014	2	.	271	241	271	271
chrIII	WBGene00003826	ntl-3	-1	11831285	11846487	Different TSS	.	11847699	11847699		11847699	.	1212	1212		1212	.	11846365	1519	66	.	1334	1334		1334
chrIV	WBGene00003827	ntl-4	1	7910581	7914283	Different TSS	.	7909661	7909695	7909661	7909661	.	920	886	920	920	.	7910588	904	2	.	927	893	927	927
chrX	WBGene00003828	nuc-1	1	9539848	9542373		.				9539851	.				-3	.	9539882	138	1	.				31
chrIII	WBGene00003829	nud-1	1	13341424	13342507		.				13341028	.				396	.	13341426	580	4	.				398
chrIV	WBGene00003839	ocr-2	-1	8213812	8220022		.			8220618		.			596		.	8220067	8	0	.			551
chrX	WBGene00003843	oct-2	1	11346391	11350182	Different TSS	.		11345187		11345187	.		1204		1204	.	11346391	44	1	.		1204		1204
chrV	WBGene00003844	odc-1	-1	6898523	6900205		.	6900396	6900396	6900396	6900397	.	191	191	191	192	.	6900205	1027	1	.	191	191	191	192
chrX	WBGene00003846	odd-2	-1	6159353	6160450		.				6162131	.				1681	.	6160486	267	0	.				1645
chrI	WBGene00003847	blmp-1	1	10409350	10413837	Same TSS	.	10405311	10404024		10406229	.	4039	5326		3121	.	10409293	278	1	.	3982	5269		3064
chrV	WBGene00003850	odr-3	-1	13246869	13249520		.			13254812		.			5292		.	13249522	26	0	.			5290
chrIII	WBGene00003851	odr-4	1	6730726	6733881	Different TSS	.				6730367	.				359	.	6732108	189	2	.				1741
chrIII	WBGene00003858	ogt-1	-1	7145754	7153708	Different TSS	.	7153868	7153847	7153847	7153847	.	160	139	139	139	.	7153731	306	128	.	137	116	116	116
chrIII	WBGene00003859	oig-1	-1	6524049	6525607		.			6526315	6526315	.			708	708	.	6525605	181	0	.			710	710
chrII	WBGene00003868	ooc-3	-1	11493167	11495250	Same TSS	.	11495468	11495468		11495468	.	218	218		218	.	11495250	591	1	.	218	218		218
chrIV	WBGene00003876	pept-2	1	10790578	10794544		.			10790572		.			6		.	10790633	281	1	.			61
chrX	WBGene00003883	osm-1	1	16541257	16551140		.		16541321			.		-64			.				.
chrX	WBGene00003885	osm-5	1	2984268	2991440		.	2984251	2984251			.	17	17			.				.
chrIII	WBGene00003890	osm-10	1	7243243	7245673		.			7243242	7243245	.			1	-2	.				.
chrX	WBGene00003891	osm-11	-1	17420142	17421509		.	17421392		17421392	17421392	.	-117		-117	-117	.	17421747	2	0	.	-355		-355	-355
chrIII	WBGene00003892	osm-12	-1	12190955	12202349		.	12202404	12202400			.	55	51			.				.
chrIV	WBGene00003893	ost-1	1	1107396	1110860		.	1107434	1107434	1107434	1107434	.	-38	-38	-38	-38	.				.
chrIII	WBGene00003901	paa-1	1	5450067	5453099		.	5450154	5450154	5450152	5450152	.	-87	-87	-85	-85	.	5450691	5240	18	.	537	537	539	539
chrI	WBGene00003902	pab-1	-1	10432806	10435867	Same TSS	.	10435811	10435811	10435813	10435811	.	-56	-56	-54	-56	.	10435229	42	1	.	582	582	584	582
chrX	WBGene00003903	pab-2	-1	13522779	13527345	Different TSS	.	13527319	13527321	13527321	13527319	.	-26	-24	-24	-26	.	13525753	128	0	.	1566	1568	1568	1566
chrI	WBGene00003904	pabp-2	-1	9420899	9421987		.	9422300	9422300	9422300	9422300	.	313	313	313	313	.	9421985	2734	8	.	315	315	315	315
chrI	WBGene00003905	pad-1	1	12878585	12902794		.		12877259	12876316	12877264	.		1326	2269	1321	.	12878629	329	0	.		1370	2313	1365
chrX	WBGene00003907	paf-2	-1	4291449	4294758	Same TSS	.	4295148			4295148	.	390			390	.	4294326	76	0	.	822			822
chrX	WBGene00003911	pak-1	-1	6044274	6048575	Different TSS	.	6050218	6052857			.	1643	4282			.	6048573	901	4	.	1645	4284
chrIII	WBGene00003915	pan-1	1	4562706	4566248	Same TSS	.	4560723	4560723		4562358	.	1983	1983		348	.	4562706	905	3	.	1983	1983		348
chrIV	WBGene00003920	par-5	-1	11820482	11821901		.	11822085	11822580	11822080	11822580	.	184	679	179	679	.	11821894	4370	54	.	191	686	186	686
chrV	WBGene00003923	pas-2	1	10770301	10771332		.		10770263	10770222	10770263	.		38	79	38	.	10770348	1745	15	.		85	126	85
chrI	WBGene00003924	pas-3	-1	5105110	5106207		.	5106162	5106162	5106162	5106162	.	-45	-45	-45	-45	.	5106051	1248	12	.	111	111	111	111
chrI	WBGene00003925	pas-4	-1	8727208	8728528		.		8728540		8728544	.		12		16	.	8728481	1545	15	.		59		63
chrI	WBGene00003926	pas-5	1	10566337	10567383		.			10566246	10566246	.			91	91	.	10566339	2654	28	.			93	93
chrV	WBGene00003927	pas-6	-1	5583189	5584332		.	5584508	5584508	5584524	5584508	.	176	176	192	176	.	5584327	1359	11	.	181	181	197	181
chrII	WBGene00003928	pas-7	-1	10098719	10099808		.		10099964			.		156			.	10099795	2254	6	.		169
chrIII	WBGene00003929	pat-2	1	8818821	8825189		.	8815939	8815943			.	2882	2878			.	8818818	222	0	.	2879	2875
chrIII	WBGene00003930	pat-3	-1	3908895	3914118		.	3915786	3915793		3914925	.	1668	1675		807	.	3914129	1412	3	.	1657	1664		796
chrIV	WBGene00003932	pat-6	-1	261883	264234		.	264494	264494	264494	264494	.	260	260	260	260	.	264232	923	4	.	262	262	262	262
chrI	WBGene00003934	pat-10	-1	5018770	5020166		.	5020080	5020080	5020078	5020080	.	-86	-86	-88	-86	.				.
chrIV	WBGene00003947	pbs-1	-1	1708803	1709752		.	1709889	1709889	1709889	1709889	.	137	137	137	137	.	1709744	6671	15	.	145	145	145	145
chrII	WBGene00003949	pbs-3	-1	4954494	4955425		.				4955511	.				86	.	4955421	1887	230	.				90
chrI	WBGene00003950	pbs-4	1	3908748	3909926		.		3908656	3908656		.		92	92		.	3908750	2653	10	.		94	94
chrIII	WBGene00003952	pbs-6	-1	8243048	8244023		.	8244143	8244143		8244143	.	120	120		120	.	8244021	2091	30	.	122	122		122
chrI	WBGene00003953	pbs-7	-1	8695197	8696370		.		8696376		8696375	.		6		5	.	8696293	1863	24	.		83		82
chrIV	WBGene00003955	pcn-1	-1	4047922	4049443		.	4049616	4049616	4049616	4049616	.	173	173	173	173	.	4049441	4875	16	.	175	175	175	175
chrIII	WBGene00003956	pcp-1	1	7758665	7761208		.				7758826	.				-161	.				.
chrII	WBGene00003960	pcs-1	-1	11574874	11577214	Different TSS	.		11578446	11578446	11578446	.		1232	1232	1232	.	11577132	190	1	.		1314	1314	1314
chrIV	WBGene00003961	pct-1	1	8176471	8188865	Different TSS	.		8170578			.		5893			.	8176467	147	1	.		5889
chrIII	WBGene00003962	pdi-1	-1	3699701	3701458		.	3701665	3701639	3701665	3701665	.	207	181	207	207	.	3701443	1199	16	.	222	196	222	222
chrX	WBGene00003963	pdi-2	1	4524159	4526508	Same TSS	.	4524193	4524193	4524193	4524193	.	-34	-34	-34	-34	.				.
chrX	WBGene00003965	pdk-1	1	1321348	1327980	Same TSS	.	1320077	1320077	1320077	1320077	.	1271	1271	1271	1271	.	1321348	307	3	.	1271	1271	1271	1271
chrII	WBGene00003966	pdl-1	1	7183784	7185118		.	7181592	7182932	7181592	7182932	.	2192	852	2192	852	.	7183767	304	0	.	2175	835	2175	835
chrX	WBGene00003968	peb-1	1	2215623	2218973	Same TSS	.	2212531	2212531	2215466	2212531	.	3092	3092	157	3092	.	2215623	54	0	.	3092	3092	157	3092
chrX	WBGene00003970	pek-1	-1	11410117	11414747		.	11414896		11414833	11414833	.	149		86	86	.	11414782	71	0	.	114		51	51
chrIII	WBGene00003975	pen-2	1	11343184	11344137		.		11343217			.		-33			.				.
chrIII	WBGene00003978	pes-4	-1	1215968	1222064		.	1222184	1228684	1222187	1222187	.	120	6620	123	123	.	1222064	1091	1	.	120	6620	123	123
chrI	WBGene00003980	pes-7	1	14263289	14271305		.			14260735		.			2554		.	14263291	178	2	.			2556
chrV	WBGene00003982	pes-9	-1	14595253	14597052		.	14597152	14597893		14597157	.	100	841		105	.	14597019	1674	7	.	133	874		138
chrX	WBGene00003986	pes-22	-1	4921221	4929720	Different TSS	.		4932885			.		3165			.	4926901	276	0	.		5984
chrI	WBGene00003989	pfn-1	1	12921991	12923535		.	12921150	12921157	12919395	12920849	.	841	834	2596	1142	.	12921993	79	18	.	843	836	2598	1144
chrX	WBGene00003990	pfn-2	-1	5353022	5354112		.	5354526	5354534	5355375	5354299	.	414	422	1263	187	.	5354040	1446	4	.	486	494	1335	259
chrI	WBGene00003996	pgp-2	1	5886628	5895974		.	5886376	5886376		5886376	.	252	252		252	.	5886616	69	0	.	240	240		240
chrX	WBGene00003998	pgp-4	1	11358331	11363975	Different TSS	.				11358386	.				-55	.	11359089	2	0	.				703
chrX	WBGene00004004	pgp-10	1	7158991	7165971		.			7157746		.			1245		.	7158993	78	1	.			1247
chrV	WBGene00004013	pha-4	1	20752905	20760272	Different TSS	.	20749149	20749361		20752891	.	3756	3544		14	.	20756879	313	0	.	7730	7518		3988
chrII	WBGene00004015	phb-2	1	6251373	6252975		.	6251034	6251025		6251034	.	339	348		339	.	6251380	4030	56	.	346	355		346
chrII	WBGene00004017	phg-1	1	10137597	10139158		.		10136931		10136931	.		666		666	.	10134886	1165	0	.		-2045		-2045
chrII	WBGene00004020	pho-1	-1	5233145	5235913		.				5235927	.				14	.	5235833	258	0	.				94
chrIV	WBGene00004025	phy-2	-1	12211073	12215967		.	12217226	12217226		12217226	.	1259	1259		1259	.	12215965	966	2	.	1261	1261		1261
chrV	WBGene00004032	pkc-1	-1	12015078	12024143	Different TSS	.			12026928	12024331	.			2785	188	.	12024141	209	2	.			2787	190
chrII	WBGene00004034	pkc-3	1	5380008	5384154		.		5379889			.		119			.	5380010	285	182	.		121
chrV	WBGene00004037	plc-2	1	15192651	15197644		.		15192649		15192649	.		2		2	.				.
chrIV	WBGene00004039	plc-4	-1	7509454	7512662		.	7512781	7512974	7512785	7512785	.	119	312	123	123	.	7512656	126	2	.	125	318	129	129
chrII	WBGene00004040	pld-1	-1	5083840	5091628		.	5092434	5092437	5092798	5092798	.	806	809	1170	1170	.	5091682	150	1	.	752	755	1116	1116
chrIII	WBGene00004042	plk-1	1	8101281	8104010	Different TSS	.	8101129	8101152		8101132	.	152	129		149	.	8101282	2244	9	.	153	130		150
chrI	WBGene00004043	plk-2	-1	2755581	2758213		.				2758676	.				463	.	2758206	239	1	.				470
chrIV	WBGene00004046	plp-1	1	7633342	7634646		.	7633146	7632765			.	196	577			.	7633349	5691	34	.	203	584
chrIV	WBGene00004047	plx-1	1	959452	984392		.				958054	.				1398	.	959452	147	2	.				1398
chrII	WBGene00004048	plx-2	-1	14417812	14424815		.	14425895	14425893			.	1080	1078			.	14424815	38	0	.	1080	1078
chrII	WBGene00004058	pmp-1	-1	6880657	6883710		.				6883850	.				140	.	6883710	100	0	.				140
chrII	WBGene00004059	pmp-2	-1	6884005	6887720		.	6887696	6887696	6887700	6887696	.	-24	-24	-20	-24	.	6887644	5	0	.	52	52	56	52
chrV	WBGene00004060	pmp-3	1	14646738	14653452	Different TSS	.	14646381	14646381	14646381	14646381	.	357	357	357	357	.	14646724	186	0	.	343	343	343	343
chrV	WBGene00004062	pmp-5	-1	6662174	6665798	Same TSS	.		6665784		6665769	.		-14		-29	.	6665796	359	0	.		-12		-27
chrV	WBGene00004064	pms-2	-1	11566783	11573073	Different TSS	.				11573116	.				43	.				.
chrIII	WBGene00004075	pod-1	-1	13514849	13523992		.		13525327			.		1335			.	13524009	818	5	.		1318
chrII	WBGene00004076	pod-2	1	1136808	1152712	Different TSS	.		1135344		1135344	.		1464		1464	.	1143915	2341	1	.		8571		8571
chrI	WBGene00004077	pop-1	-1	2823470	2830295		.	2831453	2831457			.	1158	1162			.	2830313	483	0	.	1140	1144
chrV	WBGene00004083	pph-1	1	10702529	10704886		.				10699420	.				3109	.	10702529	212	0	.				3109
chrIII	WBGene00004085	pph-4.1	-1	12344873	12351237		.		12351355			.		118			.	12351235	524	2	.		120
chrIII	WBGene00004086	pph-4.2	-1	12374137	12377149	Same TSS	.		12377322		12377322	.		173		173	.	12377147	1458	1	.		175		175
chrI	WBGene00004087	ppk-1	1	5358523	5365166		.		5358111	5357680	5357696	.		412	843	827	.	5358525	281	2	.		414	845	829
chrIII	WBGene00004088	ppk-2	1	2102285	2107460		.		2101175	2101175	2101175	.		1110	1110	1110	.	2102285	479	2	.		1110	1110	1110
chrV	WBGene00004092	ppt-1	-1	6624684	6626324		.		6626317			.		-7			.				.
chrI	WBGene00004094	ppw-2	-1	5158518	5162207		.				5162483	.				276	.	5162232	331	4	.				251
chrII	WBGene00004096	pqm-1	-1	11150277	11152542		.			11153949	11153949	.			1407	1407	.	11152535	2327	3	.			1414	1414
chrV	WBGene00004104	pqn-13	-1	5669632	5676071	Same TSS	.		5676324			.		253			.	5676071	74	0	.		253
chrII	WBGene00004105	szy-20	-1	8966859	8969411	Different TSS	.	8969347	8969348	8969349	8969348	.	-64	-63	-62	-63	.	8969263	270	1	.	84	85	86	85
chrX	WBGene00004108	pqn-18	1	12907762	12920061	Different TSS	.	12903904	12903904	12907691	12903888	.	3858	3858	71	3874	.	12907762	94	0	.	3858	3858	71	3874
chrI	WBGene00004110	pqn-20	1	6791026	6797471		.	6790543	6790543		6790543	.	483	483		483	.	6790981	586	0	.	438	438		438
chrI	WBGene00004111	pqn-21	-1	6773995	6780152	Same TSS	.	6780141	6780141		6780141	.	-11	-11		-11	.	6779911	174	1	.	230	230		230
chrI	WBGene00004115	pqn-26	-1	8771428	8777505		.		8777671			.		166			.	8777506	49	0	.		165
chrII	WBGene00004116	pqn-27	-1	13448765	13460572	Different TSS	.		13460731			.		159			.	13460572	747	0	.		159
chrI	WBGene00004117	sin-3	1	8416826	8425036	Same TSS	.		8416373			.		453			.	8416825	257	41	.		452
chrV	WBGene00004119	pqn-31	1	9109581	9110997	Different TSS	.				9109582	.				-1	.				.
chrII	WBGene00004120	pqn-32	1	13107949	13110100	Same TSS	.				13106522	.				1427	.	13107949	545	0	.				1427
chrX	WBGene00004121	pqn-34	-1	17021739	17030146	Same TSS	.	17030425	17030425			.	279	279			.	17030146	85	1	.	279	279
chrX	WBGene00004126	pqn-39	-1	13965656	13969499		.	13969566	13969566	13969325	13969325	.	67	67	-174	-174	.	13969346	3	0	.	220	220	-21	-21
chrX	WBGene00004127	pqn-40	-1	450446	457649		.				457548	.				-101	.				.
chrIII	WBGene00004132	pqn-45	-1	4472055	4475112		.	4475557	4475557	4475557	4475557	.	445	445	445	445	.	4475119	1233	3	.	438	438	438	438
chrIII	WBGene00004133	pqn-46	-1	6941833	6944683		.	6946449	6946455		6946477	.	1766	1772		1794	.				.
chrII	WBGene00004134	pqn-47	-1	10497304	10502481		.	10504724	10502683		10502636	.	2243	202		155	.	10502481	450	0	.	2243	202		155
chrII	WBGene00004135	pqn-48	1	4038874	4043132		.		4038873	4038873	4038873	.		1	1	1	.				.
chrV	WBGene00004136	pqn-51	1	5049539	5052200		.	5049704	5049704	5049725	5049725	.	-165	-165	-186	-186	.	5049592	694	3	.	-112	-112	-133	-133
chrV	WBGene00004138	pqn-53	-1	12063415	12065372		.	12065456	12065456	12065456	12065456	.	84	84	84	84	.	12065372	2031	6	.	84	84	84	84
chrIV	WBGene00004140	pqn-55	1	10286931	10292986		.	10284818	10284818		10284815	.	2113	2113		2116	.	10286933	330	1	.	2115	2115		2118
chrV	WBGene00004144	pqn-60	1	504040	504617		.				504031	.				9	.				.
chrI	WBGene00004147	larp-5	-1	3732985	3740482	Different TSS	.	3740430	3740430	3740430	3740430	.	-52	-52	-52	-52	.	3737481	1329	5	.	2949	2949	2949	2949
chrX	WBGene00004148	pqn-65	-1	4610899	4620396	Same TSS	.				4620172	.				-224	.				.
chrV	WBGene00004150	pqn-67	1	12924425	12928157		.	12924346				.	79				.				.
chrV	WBGene00004151	pqn-68	1	12952622	12953190		.	12951394	12951394		12951394	.	1228	1228		1228	.	12952620	180	2	.	1226	1226		1226
chrV	WBGene00004152	pqn-70	-1	11226296	11228685	Same TSS	.	11228800	11228800	11228800	11228800	.	115	115	115	115	.	11228685	2359	13	.	115	115	115	115
chrII	WBGene00004155	pqn-73	1	8540669	8545401	Same TSS	.		8539160			.		1509			.	8540662	144	1	.		1502
chrIV	WBGene00004156	pqn-74	-1	13329512	13331364		.			13331379	13331379	.			15	15	.				.
chrIV	WBGene00004157	pqn-75	1	4072320	4077629	Different TSS	.		4071089			.		1231			.				.
chrIII	WBGene00004161	pqn-80	1	12626474	12651656	Same TSS	.		12626357		12626357	.		117		117	.	12626469	332	20	.		112		112
chrII	WBGene00004166	pqn-85	-1	240717	255182		.	255305	255304	255305	255270	.	123	122	123	88	.	255194	437	0	.	111	110	111	76
chrII	WBGene00004167	pqn-87	-1	12209164	12221724	Same TSS	.	12222491	12225004	12225032	12225004	.	767	3280	3308	3280	.	12221725	2895	6	.	766	3279	3307	3279
chrIII	WBGene00004172	pqn-92	1	12307678	12311810		.				12306124	.				1554	.	12307680	443	0	.				1556
chrV	WBGene00004173	pqn-94	-1	20278622	20279832		.			20279993	20279993	.			161	161	.	20279830	3152	11	.			163	163
chrII	WBGene00004174	pqn-95	-1	9225118	9227173		.	9227167				.	-6				.	9227146	2	1	.	21
chrI	WBGene00004178	prg-1	-1	7585320	7588363		.				7588548	.				185	.	7588363	1	0	.				185
chrIV	WBGene00004179	prg-2	-1	6526713	6529791		.				6529968	.				177	.	6529791	3	0	.				177
chrIII	WBGene00004182	prk-1	1	6990116	7002255	Same TSS	.			6990113	6990113	.			3	3	.	6996425	70	0	.			6312	6312
chrX	WBGene00004184	prl-1	-1	3940121	3943295		.	3945784	3945786	3945771	3945730	.	2489	2491	2476	2435	.	3943293	509	0	.	2491	2493	2478	2437
chrII	WBGene00004185	pro-1	-1	10539378	10541938		.	10542089	10543644			.	151	1706			.	10541936	142	20	.	153	1708
chrIII	WBGene00004187	prp-8	1	8164312	8172639		.		8164089		8164089	.		223		223	.	8164310	744	5	.		221		221
chrII	WBGene00004188	prp-21	1	484866	490404		.		484763			.		103			.	484866	972	6	.		103
chrIII	WBGene00004189	pars-1	1	7238963	7241222	Same TSS	.		7238602		7238602	.		361		361	.	7238965	804	8	.		363		363
chrIV	WBGene00004192	prx-2	1	11644153	11646167		.		11644169		11644169	.		-16		-16	.				.
chrII	WBGene00004194	prx-5	1	8704772	8706715	Different TSS	.	8704618	8704618	8704618	8704618	.	154	154	154	154	.	8704774	376	1	.	156	156	156	156
chrV	WBGene00004195	prx-6	-1	4715377	4720095		.	4720036	4720041		4720036	.	-59	-54		-59	.				.
chrI	WBGene00004202	pry-1	-1	14172815	14179348		.	14179741	14179741	14179741	14179741	.	393	393	393	393	.	14179348	95	0	.	393	393	393	393
chrV	WBGene00004203	psa-1	-1	20239214	20249453		.	20249781	20249781		20249781	.	328	328		328	.	20249451	354	246	.	330	330		330
chrIV	WBGene00004204	psa-4	1	11126003	11131143		.	11125443	11125446	11125446	11125443	.	560	557	557	560	.	11126003	274	3	.	560	557	557	560
chrII	WBGene00004208	ptc-1	1	7893178	7900433		.	7888368	7888368	7888983	7892058	.	4810	4810	4195	1120	.	7893178	337	1	.	4810	4810	4195	1120
chrII	WBGene00004210	ptc-3	-1	2845383	2852598	Different TSS	.				2859989	.				7391	.	2852598	236	0	.				7391
chrIII	WBGene00004213	ptp-1	1	3590721	3611978	Different TSS	.	3583657	3583657			.	7064	7064			.	3590715	75	0	.	7058	7058
chrII	WBGene00004214	ptp-2	1	5918603	5921594		.		5918434			.		169			.	5918624	379	8	.		190
chrV	WBGene00004216	ptr-1	-1	9178021	9181696		.	9181999	9181999		9181999	.	303	303		303	.	9181696	76	0	.	303	303		303
chrX	WBGene00004219	ptr-4	-1	6060722	6065951		.				6066609	.				658	.	6065951	245	0	.				658
chrX	WBGene00004220	ptr-5	1	17318510	17326529		.		17315175		17315175	.		3335		3335	.	17318510	50	0	.		3335		3335
chrII	WBGene00004222	ptr-8	1	10889219	10893217		.			10887327	10887331	.			1892	1888	.	10889219	104	0	.			1892	1888
chrI	WBGene00004224	ptr-10	1	5662146	5667147		.	5662145	5662145		5662145	.	1	1		1	.	5662287	6	0	.	142	142		142
chrII	WBGene00004227	ptr-13	-1	11157233	11162273		.				11162307	.				34	.	11162210	184	0	.				97
chrIV	WBGene00004228	ptr-14	1	10615481	10620935		.		10613982	10613973	10613982	.		1499	1508	1499	.	10615409	344	0	.		1427	1436	1427
chrV	WBGene00004229	ptr-15	-1	6966377	6970109		.	6970119	6970122		6970092	.	10	13		-17	.	6969982	13	0	.	137	140		110
chrII	WBGene00004232	ptr-18	1	12965499	12978087		.				12959960	.				5539	.	12965477	186	0	.				5517
chrIII	WBGene00004233	ptr-19	1	10781782	10791077	Same TSS	.		10780891			.		891			.	10781756	37	0	.		865
chrX	WBGene00004238	ptr-24	1	13337983	13348055	Different TSS	.			13337270		.			713		.	13342112	140	0	.			4842
chrIV	WBGene00004239	puf-3	-1	13510282	13512144		.			13512350	13512350	.			206	206	.	13512138	18	2	.			212	212
chrX	WBGene00004245	puf-9	1	5841555	5845953		.	5841339	5841339	5841339	5841339	.	216	216	216	216	.	5841557	193	2	.	218	218	218	218
chrV	WBGene00004248	pus-1	-1	16792744	16794987	Different TSS	.		16795064			.		77			.	16794985	525	0	.		79
chrIII	WBGene00004249	pvf-1	-1	1821141	1824105		.			1824122		.			17		.				.
chrIV	WBGene00004254	pxf-1	-1	10164309	10174319	Different TSS	.	10175071	10176372		10175389	.	752	2053		1070	.	10174317	841	2	.	754	2055		1072
chrV	WBGene00004256	pxn-1	1	8494868	8502139		.				8494576	.				292	.	8494870	91	0	.				294
chrX	WBGene00004257	pxn-2	-1	10972106	10979199		.	10979503	10979503			.	304	304			.	10979201	70	0	.	302	302
chrV	WBGene00004258	pyc-1	-1	11817764	11822510	Different TSS	.			11822506	11823597	.			-4	1087	.	11822346	756	304	.			160	1251
chrII	WBGene00004259	pyr-1	1	8651057	8658766		.				8650445	.				612	.	8651059	186	1	.				614
chrII	WBGene00004264	qua-1	1	8198752	8203954		.				8198370	.				382	.	8198752	40	0	.				382
chrIV	WBGene00004265	qui-1	1	13561849	13574395		.				13561765	.				84	.	13561838	11	0	.				73
chrV	WBGene00004266	rab-1	-1	1262621	1263992		.	1264509	1264489	1264509	1264509	.	517	497	517	517	.	1263990	1398	3	.	519	499	519	519
chrII	WBGene00004267	rab-3	-1	5721750	5727632	Different TSS	.				5727776	.				144	.	5724711	89	2	.				3065
chrI	WBGene00004268	rab-5	1	9308429	9310213		.		9307770	9307764	9307770	.		659	665	659	.	9308434	1750	4	.		664	670	664
chrX	WBGene00004270	rab-6.2	1	17222401	17224503		.	17222013	17222011		17222011	.	388	390		390	.	17222401	2016	2	.	388	390		390
chrII	WBGene00004271	rab-7	-1	11965275	11966869		.			11966619		.			-250		.	11966867	260	642	.			-248
chrI	WBGene00004272	rab-8	-1	3682896	3684121		.	3684619	3684624	3684619	3684619	.	498	503	498	498	.	3684089	956	3	.	530	535	530	530
chrI	WBGene00004273	rab-10	-1	6457063	6458483		.	6459652	6459652	6459648	6459648	.	1169	1169	1165	1165	.	6458481	810	4	.	1171	1171	1167	1167
chrI	WBGene00004274	rab-11.1	-1	108686	110077		.	110658	110691	110068	110691	.	581	614	-9	614	.	110057	8317	11	.	601	634	11	634
chrX	WBGene00004276	rab-14	-1	15604697	15606567		.	15606892	15606928	15606872	15606789	.	325	361	305	222	.	15606567	163	0	.	325	361	305	222
chrIII	WBGene00004277	rab-18	-1	1079455	1080471	Different TSS	.	1080690	1080695	1080695	1080695	.	219	224	224	224	.	1080471	1402	2	.	219	224	224	224
chrIII	WBGene00004282	rab-30	1	10562925	10565504		.	10562685	10562648		10562648	.	240	277		277	.	10562927	215	0	.	242	279		279
chrII	WBGene00004286	rab-39	-1	9321796	9322850		.		9323020	9323020	9323020	.		170	170	170	.	9322855	569	1	.		165	165	165
chrIV	WBGene00004297	rad-51	-1	10281615	10284222	Different TSS	.	10284696	10284683			.	474	461			.	10283992	767	6	.	704	691
chrII	WBGene00004300	ram-2	-1	11015529	11016783		.			11016842	11016779	.			59	-4	.				.
chrIII	WBGene00004302	ran-1	-1	10746242	10747631		.	10748051	10748052	10748020	10748020	.	420	421	389	389	.	10747629	8825	61	.	422	423	391	391
chrII	WBGene00004304	ran-3	-1	8322581	8325004		.		8325246		8325246	.		242		242	.	8325002	1175	51	.		244		244
chrI	WBGene00004305	ran-4	1	8591206	8591989		.	8590773	8590772		8590774	.	433	434		432	.	8591209	2260	9	.	436	437		435
chrII	WBGene00004306	ran-5	1	6048079	6049667		.	6047865	6047867	6047867	6047867	.	214	212	212	212	.	6048082	1190	14	.	217	215	215	215
chrIV	WBGene00004307	rap-1	-1	8916239	8918877		.	8921989	8922048	8921989	8921989	.	3112	3171	3112	3112	.	8918877	2590	121	.	3112	3171	3112	3112
chrV	WBGene00004308	rap-2	-1	15061246	15064070		.	15065118	15065118	15065118	15065118	.	1048	1048	1048	1048	.	15064068	333	2	.	1050	1050	1050	1050
chrII	WBGene00004310	ras-1	-1	12345342	12352395		.	12352322	12352326	12353151	12352320	.	-73	-69	756	-75	.	12352159	88	3	.	163	167	992	161
chrIII	WBGene00004311	ras-2	-1	4737554	4740042		.				4740759	.				717	.	4740040	505	0	.				719
chrX	WBGene00004313	rbc-1	1	14611335	14624788		.	14610584	14610584	14610584	14610584	.	751	751	751	751	.	14611312	283	1	.	728	728	728	728
chrIII	WBGene00004314	rbc-2	-1	2512638	2528618		.		2528750		2528780	.		132		162	.	2528679	45	2	.		71		101
chrIV	WBGene00004315	rbd-1	1	12724897	12730075		.		12724895		12724895	.		2		2	.	12724963	531	1	.		68		68
chrIII	WBGene00004316	rbf-1	1	6675748	6703943	Different TSS	.			6675723	6675705	.			25	43	.	6690954	23	0	.			15231	15249
chrX	WBGene00004317	rbg-1	1	14983455	14987298		.	14983466	14983463	14983447	14983466	.	-11	-8	8	-11	.	14983463	15	0	.	-3	0	16	-3
chrI	WBGene00004318	rbg-2	1	7962047	7972436	Same TSS	.		7961934			.		113			.	7962049	262	0	.		115
chrIV	WBGene00004319	rbr-2	1	10920086	10926776		.	10919461	10919452	10919461	10919468	.	625	634	625	618	.	10920056	553	0	.	595	604	595	588
chrV	WBGene00004320	rbx-1	-1	9689658	9690591		.		9690860		9690864	.		269		273	.	9690498	5589	36	.		362		366
chrIII	WBGene00004321	rcn-1	-1	5682301	5684053		.	5688342	5688342	5688342	5688335	.	4289	4289	4289	4282	.	5684053	198	2	.	4289	4289	4289	4282
chrV	WBGene00004323	rde-1	-1	9987891	9991618		.	9991756	9991757	9991757	9991756	.	138	139	139	138	.	9991618	801	1	.	138	139	139	138
chrIII	WBGene00004326	rde-4	-1	10217208	10218555		.		10218631		10218631	.		76		76	.	10218553	1057	4	.		78		78
chrV	WBGene00004336	ret-1	-1	14829162	14847297	Different TSS	.	14851336	14851336	14849726	14851336	.	4039	4039	2429	4039	.	14831606	2205	3	.	19730	19730	18120	19730
chrV	WBGene00004337	rfc-1	-1	14642725	14645937		.	14646280	14646281		14645933	.	343	344		-4	.	14645786	44	0	.	494	495		147
chrIV	WBGene00004338	rfc-2	1	1347316	1352980		.	1347205	1347212	1347212	1347205	.	111	104	104	111	.	1347316	942	2	.	111	104	104	111
chrIII	WBGene00004340	rfc-4	1	6972155	6973667		.		6972107			.		48			.	6972200	1824	5	.		93
chrIII	WBGene00004344	rgs-1	-1	10014503	10016444	Same TSS	.	10016639	10016705	10016629	10016639	.	195	261	185	195	.	10016468	137	0	.	171	237	161	171
chrII	WBGene00004347	rgs-4	1	12667632	12671556	Different TSS	.			12667556	12667556	.			76	76	.				.
chrIII	WBGene00004348	rgs-5	1	5698390	5702257	Same TSS	.		5698559			.		-169			.				.
chrX	WBGene00004349	rgs-6	-1	5720407	5728623		.			5730909	5730909	.			2286	2286	.	5728621	109	0	.			2288	2288
chrX	WBGene00004350	rgs-7	1	3542545	3557581	Different TSS	.	3541139	3541135			.	1406	1410			.	3542537	168	0	.	1398	1402
chrX	WBGene00004356	rhi-1	1	4508480	4510936		.			4508132	4508132	.			348	348	.	4508482	855	4	.			350	350
chrIV	WBGene00004357	rho-1	-1	16483178	16488988		.	16490046	16490046	16492231	16492230	.	1058	1058	3243	3242	.	16488988	2405	4	.	1058	1058	3243	3242
chrIV	WBGene00004363	ric-3	1	7818239	7821149		.	7818119	7818152	7818112	7818152	.	120	87	127	87	.	7818239	432	1	.	120	87	127	87
chrV	WBGene00004364	ric-4	-1	10261105	10270289	Different TSS	.		10273851	10273796	10273829	.		3562	3507	3540	.	10270289	333	1	.		3562	3507	3540
chrX	WBGene00004369	rig-1	1	8661224	8671701	Different TSS	.	8660440	8660440			.	784	784			.	8661226	23	0	.	786	786
chrX	WBGene00004370	rig-3	1	6853578	6860885		.	6853160	6853160		6853160	.	418	418		418	.	6853578	189	0	.	418	418		418
chrX	WBGene00004375	rme-4	-1	10373170	10377692	Different TSS	.	10379037	10379034	10377715	10377715	.	1345	1342	23	23	.	10377602	125	0	.	1435	1432	113	113
chrX	WBGene00004377	rme-6	1	1097149	1103317	Different TSS	.		1097052			.		97			.	1097149	117	3	.		97
chrI	WBGene00004378	rme-8	1	8083576	8095569	Same TSS	.		8083523			.		53			.	8083578	294	3	.		55
chrIV	WBGene00004385	rnp-2	1	4172095	4173981		.	4172018	4172018		4172018	.	77	77		77	.	4172095	1183	5	.	77	77		77
chrIII	WBGene00004388	rnp-5	-1	852791	853901		.		854110		854110	.		209		209	.	853899	757	9	.		211		211
chrI	WBGene00004389	rnp-6	-1	3539046	3546907	Same TSS	.		3546996			.		89			.	3546907	473	2	.		89
chrIII	WBGene00004392	rnr-2	-1	4093280	4094899		.	4095046	4095046		4095046	.	147	147		147	.	4094895	4557	39	.	151	151		151
chrII	WBGene00004397	rol-6	1	8733000	8734264		.				8732827	.				173	.	8733000	1880	3	.				173
chrII	WBGene00004398	rol-8	1	7544058	7545284	Same TSS	.				7544059	.				-1	.				.
chrIII	WBGene00004400	rom-1	1	4907190	4908786		.		4905707			.		1483			.	4907173	417	1	.		1466
chrV	WBGene00004405	rop-1	-1	10252797	10255032		.	10255237	10255170	10255237	10255237	.	205	138	205	205	.	10255030	532	3	.	207	140	207	207
chrI	WBGene00004408	rla-0	1	10567881	10569008		.		10567720		10567720	.		161		161	.	10567883	22491	123	.		163		163
chrIV	WBGene00004410	rla-2	-1	13369400	13370269		.	13370467	13370467		13370459	.	198	198		190	.	13370261	33917	263	.	206	206		198
chrI	WBGene00004412	rpl-1	-1	2875397	2876326	Different TSS	.	2876468	2876467		2876467	.	142	141		141	.	2876310	41112	239	.	158	157		157
chrV	WBGene00004413	rpl-2	1	20479656	20480815		.	20479340	20479340	20479340	20479340	.	316	316	316	316	.	20479658	497	3	.	318	318	318	318
chrIII	WBGene00004414	rpl-3	1	3867833	3869527	Different TSS	.		3867628		3867628	.		205		205	.	3867835	27655	154	.		207		207
chrI	WBGene00004415	rpl-4	-1	4645637	4646966		.	4647212	4647212		4647198	.	246	246		232	.	4646964	38299	77	.	248	248		234
chrII	WBGene00004416	rpl-5	1	8569874	8570999		.		8569553			.		321			.	8569876	50045	133	.		323
chrIII	WBGene00004417	rpl-6	1	7208370	7209800		.		7208088		7208088	.		282		282	.	7208385	56169	136	.		297		297
chrIV	WBGene00004419	rpl-7A	-1	4389128	4390624	Same TSS	.		4390563			.		-61			.				.
chrIII	WBGene00004420	rpl-9	-1	7572038	7572766		.	7572965	7572968		7572937	.	199	202		171	.	7572764	59386	145	.	201	204		173
chrII	WBGene00004421	rpl-10	1	8143811	8144621		.	8143454	8143484		8143479	.	357	327		332	.	8143829	87463	310	.	375	345		350
chrV	WBGene00004422	rpl-11.1	-1	3585312	3586063		.				3586390	.				327	.	3586061	11145	77	.				329
chrX	WBGene00004423	rpl-11.2	-1	2241748	2242612		.	2242911	2242911		2242911	.	299	299		299	.	2242610	55970	102	.	301	301		301
chrIV	WBGene00004424	rpl-12	-1	13239564	13240627	Different TSS	.	13240576	13240576	13240576	13240576	.	-51	-51	-51	-51	.	13240374	2	0	.	202	202	202	202
chrI	WBGene00004425	rpl-13	1	3788037	3788914	Same TSS	.	3787819	3787817	3787817	3787811	.	218	220	220	226	.	3788039	23478	131	.	220	222	222	228
chrIV	WBGene00004427	rpl-15	-1	653438	654582		.	654872	654872		654872	.	290	290		290	.	654576	37655	215	.	296	296		296
chrI	WBGene00004429	rpl-17	1	1156580	1157465	Different TSS	.		1156252		1156252	.		328		328	.	1156582	29772	215	.		330		330
chrIV	WBGene00004432	rpl-20	-1	4749004	4749774		.		4750010		4749982	.		236		208	.	4749770	51603	195	.		240		212
chrIII	WBGene00004433	rpl-21	-1	8129484	8130397		.		8130427		8130400	.		30		3	.	8130161	37780	204	.		266		239
chrII	WBGene00004434	rpl-22	1	5055606	5056209	Different TSS	.	5055451	5055453		5055453	.	155	153		153	.	5055608	33731	204	.	157	155		155
chrIII	WBGene00004435	rpl-23	-1	5705468	5706281		.	5706347	5706347		5706342	.	66	66		61	.	5706082	11848	134	.	265	265		260
chrI	WBGene00004436	rpl-24.1	1	4584961	4586184		.	4584937	4584938		4584945	.	24	23		16	.	4585116	71173	130	.	179	178		171
chrI	WBGene00004437	rpl-24.2	1	9669404	9670132		.		9669310			.		94			.	9669406	2038	11	.		96
chrI	WBGene00004439	rpl-25.2	-1	8329054	8329642		.		8329738		8330034	.		96		392	.	8329640	59822	152	.		98		394
chrII	WBGene00004440	rpl-26	1	8602549	8603530	Same TSS	.	8602525	8602522		8602522	.	24	27		27	.	8602736	33056	219	.	211	214		214
chrV	WBGene00004442	rpl-28	-1	12727576	12728097		.	12728420	12728420		12728420	.	323	323		323	.	12728095	72179	168	.	325	325		325
chrIV	WBGene00004443	rpl-29	1	13882169	13882638	Different TSS	.		13881999		13881999	.		170		170	.	13882200	201548	729	.		201		201
chrI	WBGene00004444	rpl-30	1	10436243	10436874		.	10435902	10435902		10435902	.	341	341		341	.	10436245	52831	301	.	343	343		343
chrI	WBGene00004445	rpl-31	-1	13652927	13653694	Different TSS	.		13653897		13653896	.		203		202	.	13653692	36078	193	.		205		204
chrII	WBGene00004446	rpl-32	-1	9056438	9057050	Different TSS	.	9057338	9057338		9057338	.	288	288		288	.	9057024	53723	162	.	314	314		314
chrII	WBGene00004447	rpl-33	1	7105514	7106420		.	7105196	7105196		7105196	.	318	318		318	.	7105521	43986	274	.	325	325		325
chrIV	WBGene00004448	rpl-34	1	12268754	12269511		.		12268596			.		158			.	12268973	42244	219	.		377
chrIII	WBGene00004449	rpl-35	1	7855051	7855613		.	7854670	7854684		7854684	.	381	367		367	.	7855067	67553	162	.	397	383		383
chrIII	WBGene00004450	rpl-36	1	7180187	7180615		.	7179815	7179847		7179847	.	372	340		340	.	7180189	44826	162	.	374	342		342
chrV	WBGene00004452	rpl-38	1	15512148	15512755		.		15511838		15511838	.		310		310	.	15512161	85190	368	.		323		323
chrV	WBGene00004453	rpl-39	-1	7775719	7776067		.	7776272	7776240		7776240	.	205	173		173	.	7776060	190475	1036	.	212	180		180
chrII	WBGene00004454	rpl-41	-1	11096509	11097148		.	11097438	11097434		11097427	.	290	286		279	.	11097146	274481	484	.	292	288		281
chrII	WBGene00004456	rpl-43	1	14155203	14155611		.	14154549	14154549	14154523	14154549	.	654	654	680	654	.	14155205	28030	85	.	656	656	682	656
chrIV	WBGene00004458	rpn-1	-1	6906404	6910145		.	6910215	6910215	6910215	6910215	.	70	70	70	70	.	6909902	2504	9	.	313	313	313	313
chrIII	WBGene00004459	rpn-2	1	6198850	6202575	Same TSS	.		6198838		6198862	.		12		-12	.	6199134	765	8	.		296		272
chrIII	WBGene00004460	rpn-3	1	8447277	8449265		.		8447179		8447179	.		98		98	.	8447279	2414	9	.		100		100
chrII	WBGene00004461	rpn-5	-1	4696416	4698424		.		4698394			.		-30			.	4698291	2913	7	.		103
chrIII	WBGene00004462	rpn-6.1	-1	6959054	6961971	Different TSS	.	6962147	6962135		6962153	.	176	164		182	.	6960884	3689	12	.	1263	1251		1269
chrIV	WBGene00004463	rpn-7	1	9316614	9318195		.	9316280	9316280	9316271	9316271	.	334	334	343	343	.	9316622	1586	6	.	342	342	351	351
chrI	WBGene00004464	rpn-8	1	4175319	4177274		.		4175106	4175106	4175106	.		213	213	213	.	4175321	986	8	.		215	215	215
chrII	WBGene00004467	rpn-11	-1	4043064	4044340		.	4044518	4044518	4044518	4044518	.	178	178	178	178	.	4044333	1110	10	.	185	185	185	185
chrII	WBGene00004468	rpn-12	1	11652989	11654130		.		11652929	11652929	11652929	.		60	60	60	.	11653060	1681	5	.		131	131	131
chrIII	WBGene00004469	rps-0	-1	4752864	4754048		.	4754281	4754281	4754281	4754281	.	233	233	233	233	.	4754016	16455	93	.	265	265	265	265
chrIII	WBGene00004470	rps-1	1	4475885	4476856		.		4475699		4475699	.		186		186	.	4475887	38262	119	.		188		188
chrIV	WBGene00004471	rps-2	-1	7925336	7926386		.		7926589		7926589	.		203		203	.	7926379	18253	29	.		210		210
chrIV	WBGene00004473	rps-4	-1	7083683	7084673		.	7084854	7084854	7084861	7084854	.	181	181	188	181	.	7084671	48373	65	.	183	183	190	183
chrIV	WBGene00004474	rps-5	-1	11110081	11111031		.		11111322		11111322	.		291		291	.	11111024	42915	96	.		298		298
chrI	WBGene00004475	rps-6	1	13952146	13953182		.	13951873	13951918		13951918	.	273	228		228	.	13952149	27370	46	.	276	231		231
chrI	WBGene00004476	rps-7	1	10330863	10331738		.	10330646	10330646	10330656	10330646	.	217	217	207	217	.	10330870	100502	305	.	224	224	214	224
chrIV	WBGene00004477	rps-8	-1	7312970	7313855		.	7314081	7314081		7314081	.	226	226		226	.	7313849	27752	162	.	232	232		232
chrII	WBGene00004478	rps-9	-1	11125310	11126310		.		11126489		11126480	.		179		170	.	11126304	26920	204	.		185		176
chrI	WBGene00004479	rps-10	-1	4583874	4584516		.	4584802	4584802	4584802	4584802	.	286	286	286	286	.	4584506	40357	139	.	296	296	296	296
chrIV	WBGene00004480	rps-11	1	11602361	11603264		.	11602338	11602338		11602338	.	23	23		23	.	11602618	59666	241	.	280	280		280
chrIII	WBGene00004481	rps-12	1	5679194	5680142		.		5679134		5679134	.		60		60	.	5679253	68413	332	.		119		119
chrIII	WBGene00004482	rps-13	-1	6374041	6374950		.	6375072	6375056		6375063	.	122	106		113	.	6374944	50378	263	.	128	112		119
chrI	WBGene00004484	rps-15	-1	8815506	8816482		.		8816513			.		31			.	8816187	40488	209	.		326
chrI	WBGene00004486	rps-17	-1	6220091	6220768		.	6220958	6220945		6220945	.	190	177		177	.	6220766	115119	364	.	192	179		179
chrIV	WBGene00004487	rps-18	1	14825645	14826428		.	14825246	14825275		14825275	.	399	370		370	.	14825647	28744	131	.	401	372		372
chrI	WBGene00004488	rps-19	-1	9625048	9625998		.	9626037	9626037		9625997	.	39	39		-1	.	9625788	29982	148	.	249	249		209
chrI	WBGene00004489	rps-20	-1	14468309	14469342		.	14469271	14469271		14469271	.	-71	-71		-71	.	14469091	29111	158	.	180	180		180
chrIII	WBGene00004490	rps-21	-1	7189079	7189576		.		7189805		7189805	.		229		229	.	7189569	44377	316	.		236		236
chrIII	WBGene00004491	rps-22	1	1950483	1951418	Same TSS	.	1950484	1950482		1950482	.	-1	1		1	.	1950651	39561	193	.	167	169		169
chrIV	WBGene00004492	rps-23	-1	12390240	12391372		.	12391245	12391245		12391223	.	-127	-127		-149	.	12391029	119862	359	.	216	216		194
chrIV	WBGene00004493	rps-24	1	385887	386609		.		385672		385673	.		215		214	.	385894	31690	193	.		222		221
chrIV	WBGene00004494	rps-25	-1	5947024	5947595		.	5947879	5947879		5947879	.	284	284		284	.	5947593	112470	260	.	286	286		286
chrI	WBGene00004495	rps-26	1	14759907	14760652		.	14759585	14759585	14759585	14759585	.	322	322	322	322	.	14759919	62997	271	.	334	334	334	334
chrV	WBGene00004496	rps-27	-1	103385	104070		.	104634	104634	104637	104607	.	564	564	567	537	.	104064	73868	222	.	570	570	573	543
chrIV	WBGene00004497	rps-28	1	1659684	1660010		.	1659292	1659292		1659292	.	392	392		392	.	1659690	167886	617	.	398	398		398
chrIII	WBGene00004498	rps-29	1	794289	795072		.	793836	793835		793855	.	453	454		434	.	794295	127664	490	.	459	460		440
chrV	WBGene00004499	rps-30	1	7776557	7777217		.	7776376	7776376		7776376	.	181	181		181	.	7776559	42063	143	.	183	183		183
chrV	WBGene00004501	rpt-1	-1	11980483	11982417		.		11982421		11982419	.		4		2	.	11982378	3423	21	.		43		41
chrII	WBGene00004504	rpt-4	-1	42207	46216	Different TSS	.	43780	43780	43813	43780	.	-2436	-2436	-2403	-2436	.	43662	2912	10	.	118	118	151	118
chrI	WBGene00004505	rpt-5	-1	5741868	5743576		.		5744035	5744049		.		459	473		.	5743574	1438	5	.		461	475
chrIII	WBGene00004506	rpt-6	1	12370353	12372524		.		12369667			.		686			.	12370355	1565	4	.		688
chrII	WBGene00004507	rpy-1	-1	6702200	6705522		.			6707555	6707555	.			2033	2033	.	6705609	77	1	.			1946	1946
chrX	WBGene00004682	rsd-3	1	11798428	11803589		.	11798281	11798281		11798287	.	147	147		141	.	11798437	437	2	.	156	156		150
chrII	WBGene00004698	rsp-1	1	11453914	11455743	Same TSS	.	11453890	11453205		11453205	.	24	709		709	.	11453916	1904	10	.	26	711		711
chrII	WBGene00004699	rsp-2	-1	11451380	11452891		.	11453731	11453068	11453737	11453068	.	840	177	846	177	.	11452891	1581	7	.	840	177	846	177
chrIII	WBGene00004700	rsp-3	-1	12686360	12687821		.	12688055	12688055	12688055	12688055	.	234	234	234	234	.	12687815	1884	15	.	240	240	240	240
chrII	WBGene00004702	rsp-5	1	6490126	6491305	Same TSS	.	6490016	6490016		6490023	.	110	110		103	.	6490135	1179	7	.	119	119		112
chrIV	WBGene00004703	rsp-6	-1	7789833	7791223	Same TSS	.	7791338	7791338	7791338	7791338	.	115	115	115	115	.	7791217	1067	16	.	121	121	121	121
chrII	WBGene00004704	rsp-7	1	10659147	10662256	Same TSS	.	10658917	10658917	10658917	10658917	.	230	230	230	230	.	10659149	331	5	.	232	232	232	232
chrIII	WBGene00004705	rsp-8	1	11826115	11831375	Different TSS	.	11825791	11825791	11825791	11825791	.	324	324	324	324	.	11826318	465	283	.	527	527	527	527
chrX	WBGene00004727	sax-1	-1	3646299	3650139	Same TSS	.	3650207	3650513	3650503	3650509	.	68	374	364	370	.	3650137	139	1	.	70	376	366	372
chrX	WBGene00004729	sax-3	-1	3451920	3465912	Same TSS	.	3472304	3467440			.	6392	1528			.	3465912	469	0	.	6392	1528
chrIV	WBGene00004732	sax-7	1	8062655	8083464	Different TSS	.			8061474	8061474	.			1181	1181	.	8062655	667	9	.			1181	1181
chrIII	WBGene00004736	sca-1	-1	10811807	10816746	Different TSS	.	10819278	10818342	10822474	10822474	.	2532	1596	5728	5728	.	10816745	2783	9	.	2533	1597	5729	5729
chrII	WBGene00004737	scc-1	1	4698718	4700991		.		4698521		4698521	.		197		197	.	4698718	432	2	.		197		197
chrV	WBGene00004738	scc-3	1	12763928	12767921		.		12763671		12763671	.		257		257	.	12763928	659	5	.		257		257
chrX	WBGene00004739	scd-1	-1	12503893	12513979	Same TSS	.			12519136	12514562	.			5157	583	.	12509150	375	1	.			9986	5412
chrV	WBGene00004740	scd-2	1	6633252	6639641		.				6629797	.				3455	.	6633214	38	0	.				3417
chrI	WBGene00004743	scm-1	-1	1862614	1872308		.	1873784	1873784		1873784	.	1476	1476		1476	.	1872308	1374	0	.	1476	1476		1476
chrX	WBGene00004745	sdc-1	1	16275696	16282375		.		16275476			.		220			.	16275696	67	0	.		220
chrX	WBGene00004746	sdc-2	1	11522647	11533384		.	11521622	11521629			.	1025	1018			.	11522647	48	0	.	1025	1018
chrV	WBGene00004747	sdc-3	-1	15039340	15048192		.		15048280		15048280	.		88		88	.	15048190	36	1	.		90		90
chrX	WBGene00004749	sdn-1	-1	10589718	10593274	Same TSS	.	10593840	10593840	10596529	10593840	.	566	566	3255	566	.	10593272	400	4	.	568	568	3257	568
chrII	WBGene00004751	sea-2	1	3961692	3972141		.		3959043	3959038	3959043	.		2649	2654	2649	.	3961692	423	0	.		2649	2654	2649
chrII	WBGene00004752	sec-5	-1	9173096	9177091		.		9177198			.		107			.	9177091	164	1	.		107
chrI	WBGene00004753	sec-8	1	10446668	10452062		.		10446595			.		73			.	10446654	76	0	.		59
chrV	WBGene00004754	sec-23	1	20091230	20105658		.	20090897	20090897	20090897	20090897	.	333	333	333	333	.	20091232	1674	3	.	335	335	335	335
chrIV	WBGene00004755	sec-24.1	-1	11561967	11566168		.		11566255		11566255	.		87		87	.	11566169	1190	3	.		86		86
chrX	WBGene00004758	sek-1	1	7816669	7820688		.		7809780			.		6889			.	7816683	540	1	.		6903
chrIII	WBGene00004760	sel-2	-1	4596109	4612303		.		4612670			.		367			.	4612314	143	0	.		356
chrIII	WBGene00004762	sel-5	-1	4571721	4578405	Same TSS	.	4578515	4578515		4578515	.	110	110		110	.	4578405	216	0	.	110	110		110
chrV	WBGene00004766	sel-9	-1	8301459	8302566		.	8302677	8302677	8302677	8302677	.	111	111	111	111	.	8302560	3504	22	.	117	117	117	117
chrX	WBGene00004769	sel-12	1	915872	918290		.	915757	915757		915794	.	115	115		78	.	915872	79	2	.	115	115		78
chrI	WBGene00004773	sem-4	1	7038897	7048833		.	7031659	7031659	7037133	7031659	.	7238	7238	1764	7238	.	7038899	85	2	.	7240	7240	1766	7240
chrX	WBGene00004774	sem-5	-1	7959779	7961677		.	7962131	7962131		7962131	.	454	454		454	.	7961675	110	1	.	456	456		456
chrI	WBGene00004775	stu-4	-1	3433159	3438545		.			3438688	3438679	.			143	134	.	3438545	519	0	.			143	134
chrX	WBGene00004780	ser-7	1	2673463	2682353	Same TSS	.				2673646	.				-183	.				.
chrIII	WBGene00004781	set-1	-1	6450755	6452322	Different TSS	.	6453765	6452830	6453752	6453765	.	1443	508	1430	1443	.	6452320	1127	6	.	1445	510	1432	1445
chrIII	WBGene00004782	set-2	-1	4922835	4930170	Different TSS	.	4930392	4930392		4930392	.	222	222		222	.	4930168	257	0	.	224	224		224
chrX	WBGene00004786	sex-1	-1	10201268	10205373		.	10205634	10205630			.	261	257			.	10205361	905	0	.	273	269
chrX	WBGene00004788	sft-4	-1	5778830	5780711		.	5781947	5781947	5781947	5781947	.	1236	1236	1236	1236	.	5780687	994	1	.	1260	1260	1260	1260
chrII	WBGene00004790	sgn-1	-1	8781950	8783584		.	8783586	8783578		8783586	.	2	-6		2	.				.
chrIII	WBGene00004798	sip-1	-1	10506008	10506703		.		10506655	10506655	10506655	.		-48	-48	-48	.				.
chrX	WBGene00004801	sir-2.2	1	13328189	13331175	Different TSS	.				13328185	.				4	.	13329193	55	2	.				1008
chrI	WBGene00004807	skr-1	1	9471333	9472634		.	9471340	9471340	9471327	9471340	.	-7	-7	6	-7	.	9471543	285	12	.	203	203	216	203
chrV	WBGene00004809	skr-3	1	16121760	16122621		.				16121126	.				634	.	16121804	1337	1	.				678
chrIV	WBGene00004816	skr-10	1	15946758	15947407		.	15945612				.	1146				.	15946752	1414	1	.	1140
chrIV	WBGene00004818	skr-12	1	17167222	17168015		.	17166274				.	948				.	17167219	733	0	.	945
chrV	WBGene00004820	skr-14	-1	4420981	4422063		.	4421827	4421827			.	-236	-236			.				.
chrIV	WBGene00004822	skr-16	1	7168698	7169334		.	7168490	7168486		7168486	.	208	212		212	.	7168698	70	0	.	208	212		212
chrX	WBGene00004825	skr-19	-1	13223570	13224639		.	13225558	13225175			.	919	536			.	13224643	792	0	.	915	532
chrX	WBGene00004827	skr-21	-1	13225805	13226595		.	13226846	13226846			.	251	251			.	13226607	994	0	.	239	239
chrX	WBGene00004829	sli-1	-1	720325	725956	Same TSS	.	727761	727765	727761	727761	.	1805	1809	1805	1805	.	725956	541	0	.	1805	1809	1805	1805
chrV	WBGene00004830	slo-1	1	18492237	18508169	Same TSS	.	18490756	18490746		18490695	.	1481	1491		1542	.	18492239	31	0	.	1483	1493		1544
chrX	WBGene00004854	slt-1	1	14674250	14683257		.				14674134	.				116	.	14674259	70	0	.				125
chrV	WBGene00004855	sma-1	1	11899545	11916604	Different TSS	.	11899362	11899363			.	183	182			.	11901089	340	2	.	1727	1726
chrIII	WBGene00004857	sma-3	-1	6860909	6863915		.		6864881		6864925	.		966		1010	.	6863914	54	0	.		967		1011
chrIII	WBGene00004858	sma-4	1	5816159	5820159	Different TSS	.			5816181	5816181	.			-22	-22	.	5816231	303	0	.			50	50
chrX	WBGene00004859	sma-5	-1	11997457	12005024	Different TSS	.				12005030	.				6	.	12001319	227	0	.				3711
chrII	WBGene00004860	sma-6	1	6324452	6327324		.	6324351	6324351	6324351	6324205	.	101	101	101	247	.	6324452	80	1	.	101	101	101	247
chrX	WBGene00004862	sma-9	1	10769223	10782897	Different TSS	.	10766583	10766586		10767931	.	2640	2637		1292	.	10769223	103	0	.	2640	2637		1292
chrIII	WBGene00004874	smc-4	1	4587474	4593091		.		4587371	4587371	4587371	.		103	103	103	.	4587469	295	0	.		98	98	98
chrI	WBGene00004875	smd-1	-1	14048073	14050991		.	14051095	14051091		14051091	.	104	100		100	.	14050991	1595	1	.	104	100		100
chrI	WBGene00004879	smg-1	-1	6900971	6913578	Same TSS	.		6914101			.		523			.	6913578	215	0	.		523
chrIII	WBGene00004884	smg-6	1	2473858	2486616	Same TSS	.	2472104	2472104	2472104	2472104	.	1754	1754	1754	1754	.	2473858	1327	2	.	1754	1754	1754	1754
chrI	WBGene00004887	smn-1	-1	9511182	9512131	Different TSS	.		9512101			.		-30			.	9512093	19	0	.		8
chrI	WBGene00004888	smo-1	1	1340680	1341260		.	1340586	1340211	1340216	1340216	.	94	469	464	464	.	1340687	9403	54	.	101	476	471	471
chrI	WBGene00004889	smp-1	1	14807456	14815703	Same TSS	.	14805045	14805045		14805048	.	2411	2411		2408	.	14807457	256	36	.	2412	2412		2409
chrIII	WBGene00004891	smr-1	1	1143052	1145210	Different TSS	.	1143041	1143041	1143036	1143041	.	11	11	16	11	.	1143162	333	5	.	121	121	126	121
chrX	WBGene00004893	sms-2	-1	944936	948882		.		949546		949590	.		664		708	.	948880	305	0	.		666		710
chrI	WBGene00004895	smu-1	1	12995796	13004366		.		12995824			.		-28			.				.
chrII	WBGene00004896	smu-2	1	3482439	3490142		.		3482444		3482444	.		-5		-5	.	3482488	15	0	.		44		44
chrV	WBGene00004897	snb-1	-1	6655534	6656484		.	6656813	6656824	6656813	6656824	.	329	340	329	340	.	6656484	2250	10	.	329	340	329	340
chrV	WBGene00004910	snf-11	-1	11305052	11308428		.			11308976	11308976	.			548	548	.	11308428	99	0	.			548	548
chrX	WBGene00004911	snf-12	1	9029423	9033904		.			9029125	9029125	.			298	298	.	9029414	50	0	.			289	289
chrX	WBGene00004912	sng-1	1	7327559	7329631		.				7327368	.				191	.	7327561	82	0	.				193
chrIV	WBGene00004914	snr-1	1	17088021	17088799		.	17087676	17087685	17087676	17087685	.	345	336	345	336	.	17088023	3326	19	.	347	338	347	338
chrI	WBGene00004915	snr-2	1	13339384	13340216		.	13339107	13339102		13339102	.	277	282		282	.	13339386	5557	27	.	279	284		284
chrII	WBGene00004916	snr-3	-1	6488029	6489735		.	6489917	6489900		6489900	.	182	165		165	.	6489729	2400	28	.	188	171		171
chrV	WBGene00004917	snr-4	-1	11978499	11979951		.	11979939	11979939	11979937	11979939	.	-12	-12	-14	-12	.	11979704	6893	23	.	235	235	233	235
chrIII	WBGene00004918	snr-5	1	7862001	7862509		.		7861727	7861680	7861670	.		274	321	331	.	7862003	4714	30	.		276	323	333
chrIII	WBGene00004919	snr-6	-1	12429071	12431220		.	12429757	12429757	12429757	12429757	.	-1463	-1463	-1463	-1463	.	12429527	10803	44	.	230	230	230	230
chrI	WBGene00004920	snr-7	1	2726658	2727547		.	2726793	2726793	2726793	2726793	.	-135	-135	-135	-135	.	2727016	11582	50	.	223	223	223	223
chrII	WBGene00004921	snt-1	1	6810920	6816411	Same TSS	.			6808776	6808776	.			2144	2144	.	6810920	294	1	.			2144	2144
chrIII	WBGene00004922	snt-2	-1	786694	793682		.		793727	793500		.		45	-182		.				.
chrV	WBGene00004923	snt-3	-1	1356911	1361318		.			1364473		.			3155		.	1361311	119	0	.			3162
chrI	WBGene00004924	snt-4	1	6436045	6441193		.		6436097	6436097	6436044	.		-52	-52	1	.	6436074	10	0	.		-23	-23	30
chrII	WBGene00004926	snt-6	-1	745469	750171	Different TSS	.				750384	.				213	.	750209	34	0	.				175
chrX	WBGene00004927	snx-1	1	1128981	1132922		.		1128741		1128741	.		240		240	.	1128983	997	1	.		242		242
chrII	WBGene00004930	sod-1	-1	6972670	6973850	Different TSS	.		6975810	6974098	6974102	.		1960	248	252	.	6973459	5519	19	.		2351	639	643
chrIII	WBGene00004933	sod-4	-1	9496927	9500120	Same TSS	.				9500882	.				762	.	9500118	184	1	.				764
chrI	WBGene00004944	sol-1	-1	7389043	7395915		.				7397543	.				1628	.	7395915	26	0	.				1628
chrII	WBGene00004945	sop-2	1	12339880	12344729		.	12339342	12339342	12339331	12339342	.	538	538	549	538	.	12339880	354	0	.	538	538	549	538
chrX	WBGene00004949	sox-2	-1	7458248	7463691	Different TSS	.	7463688			7463688	.	-3			-3	.	7460503	308	2	.	3185			3185
chrX	WBGene00004951	spc-1	-1	3117445	3127063	Same TSS	.	3127677	3127677	3127677	3127680	.	614	614	614	617	.	3127063	294	2	.	614	614	614	617
chrI	WBGene00004952	spd-1	-1	1030632	1033441		.		1034356			.		915			.	1033439	396	1	.		917
chrI	WBGene00004955	spd-5	-1	5171288	5175525		.		5175740			.		215			.	5175539	589	6	.		201
chrV	WBGene00004975	spe-39	1	6785440	6787850	Different TSS	.		6785339		6785339	.		101		101	.	6785440	82	2	.		101		101
chrI	WBGene00004978	spg-7	1	3467134	3477973		.		3466930	3466553		.		204	581		.	3467134	912	7	.		204	581
chrIII	WBGene00004980	spk-1	1	9456479	9462876	Different TSS	.	9456298	9456298	9456298	9456298	.	181	181	181	181	.	9456530	895	7	.	232	232	232	232
chrV	WBGene00004984	spn-4	-1	6783169	6784905		.		6785228		6785229	.		323		324	.	6784886	5727	18	.		342		343
chrIII	WBGene00004986	spp-1	-1	10355024	10355574		.				10355468	.				-106	.	10355424	1295	3	.				44
chrX	WBGene00004987	spp-2	-1	7315949	7316727		.				7316726	.				-1	.				.
chrX	WBGene00004990	spp-5	-1	7319887	7320338		.	7320363		7320363	7320363	.	25		25	25	.	7320308	20430	33	.	55		55	55
chrIV	WBGene00004995	spp-10	1	8477167	8480626	Same TSS	.	8476963	8476952	8476953	8476473	.	204	215	214	694	.	8477169	1545	1	.	206	217	216	696
chrX	WBGene00004998	spp-13	-1	8417366	8418398		.	8418371	8418399		8418371	.	-27	1		-27	.	8418553	51	0	.	-182	-154		-182
chrX	WBGene00004999	spp-14	1	7725904	7726337		.	7725805		7725805	7725805	.	99		99	99	.	7725928	24751	51	.	123		123	123
chrI	WBGene00005000	spp-15	-1	6249558	6250069		.	6250068	6250068		6250068	.	-1	-1		-1	.				.
chrIV	WBGene00005003	spp-18	1	9593676	9594408		.		9593689	9593689	9593689	.		-13	-13	-13	.				.
chrV	WBGene00005006	spr-1	-1	8126643	8129332		.	8129389	8129389	8129451	8129389	.	57	57	119	57	.	8129332	355	0	.	57	57	119	57
chrIV	WBGene00005007	spr-2	1	8891457	8892734	Different TSS	.	8891379	8891375	8891375	8891392	.	78	82	82	65	.	8891455	358	670	.	76	80	80	63
chrX	WBGene00005008	spr-3	1	4514071	4516866	Same TSS	.	4512960	4512960			.	1111	1111			.	4514071	145	0	.	1111	1111
chrI	WBGene00005009	spr-4	1	8103596	8109222	Same TSS	.	8100318	8100318		8100318	.	3278	3278		3278	.	8103596	80	59	.	3278	3278		3278
chrIII	WBGene00005011	F26F4.8	-1	4903961	4905398		.		4905396			.		-2			.				.
chrIV	WBGene00005015	spt-5	1	12051462	12055949		.		12051307		12051307	.		155		155	.	12051469	364	5	.		162		162
chrII	WBGene00005016	sqt-1	-1	11336627	11337771		.				11337769	.				-2	.	11337687	1	0	.				82
chrII	WBGene00005017	sqt-2	1	23328	24457		.				23231	.				97	.	23330	1336	3	.				99
chrV	WBGene00005018	sqt-3	1	12352975	12354295	Different TSS	.	12352976	12352974		12352974	.	-1	1		1	.				.
chrIV	WBGene00005019	sqv-1	1	8361074	8363426		.			8360479		.			595		.	8361076	1123	3	.			597
chrIII	WBGene00005021	sqv-3	-1	9778237	9780233		.		9780642		9780643	.		409		410	.	9780262	209	1	.		380		381
chrI	WBGene00005023	sqv-5	1	9947796	9953341	Different TSS	.		9938566	9946494		.		9230	1302		.	9947803	1216	2	.		9237	1309
chrII	WBGene00005026	sqv-8	1	9647879	9649165		.	9646414	9646414	9647627	9646296	.	1465	1465	252	1583	.	9647830	302	4	.	1416	1416	203	1534
chrI	WBGene00005078	src-2	1	14322225	14328946		.		14320622		14320622	.		1603		1603	.	14322225	221	1	.		1603		1603
chrV	WBGene00005147	srd-70	1	20454080	20456402		.			20454160		.			-80		.				.
chrIV	WBGene00005208	srg-51	-1	15139069	15140900		.				15141201	.				301	.				.
chrV	WBGene00005228	srh-2	1	728310	734280	Different TSS	.		728198	728200	728200	.		112	110	110	.	731404	45	0	.		3206	3204	3204
chrV	WBGene00005242	srh-17	1	14661290	14662913		.				14661054	.				236	.				.
chrV	WBGene00005308	srh-87	-1	2944377	2945680		.		2946206		2946204	.		526		524	.				.
chrV	WBGene00005310	srh-89	-1	7463260	7464777		.		7465589			.		812			.				.
chrV	WBGene00005387	srh-171	1	19965669	19972528		.	19962156	19962156			.	3513	3513			.				.
chrIV	WBGene00005430	srh-220	-1	3976423	3978009		.				3978255	.				246	.				.
chrV	WBGene00005642	srp-1	1	753335	755049		.		753334			.		1			.				.
chrV	WBGene00005648	srp-7	1	8179111	8183422	Different TSS	.				8179138	.				-27	.	8181406	711	9	.				2268
chrV	WBGene00005652	srr-1	-1	13049752	13053895		.				13053889	.				-6	.	13052218	15	0	.				1671
chrV	WBGene00005657	srr-6	1	5012979	5015197		.				5012613	.				366	.				.
chrIV	WBGene00005663	sars-1	1	10003705	10005562		.	10003569	10003569	10003568	10003569	.	136	136	137	136	.	10003705	518	8	.	136	136	137	136
chrIV	WBGene00005683	sru-20	1	12496042	12497821	Same TSS	.	12495480				.	562				.				.
chrIV	WBGene00005726	srv-15	1	15906550	15910059	Different TSS	.				15906535	.				15	.	15906535	13	0	.				0
chrIV	WBGene00005727	srv-16	-1	15931739	15933882		.				15933986	.				104	.				.
chrV	WBGene00005898	srx-7	1	560196	562957		.				560128	.				68	.				.
chrV	WBGene00005929	srx-38	-1	5154042	5155501		.			5155543		.			42		.				.
chrV	WBGene00005947	srx-56	1	7374372	7375576		.			7374371	7374371	.			1	1	.				.
chrX	WBGene00006055	ssr-2	-1	2823492	2826819		.			2827830	2827830	.			1011	1011	.	2826821	39	0	.			1009	1009
chrII	WBGene00006059	stc-1	-1	8563632	8566088		.		8566173			.		85			.	8566088	120	4	.		85
chrI	WBGene00006062	stn-1	1	9501260	9505156	Same TSS	.	9501108	9501111		9501111	.	152	149		149	.	9501260	97	0	.	152	149		149
chrX	WBGene00006063	sto-1	1	7562790	7564765	Same TSS	.	7562864	7562864		7562352	.	-74	-74		438	.	7562874	415	0	.	10	10		522
chrX	WBGene00006066	sto-4	1	11644076	11647227		.	11644104	11644104	11644104	11644160	.	-28	-28	-28	-84	.	11644312	536	1	.	208	208	208	152
chrX	WBGene00006067	sto-5	-1	16816187	16819195	Different TSS	.				16821605	.				2410	.	16819195	59	0	.				2410
chrX	WBGene00006068	sto-6	1	11632340	11636441		.				11630927	.				1413	.	11632340	14	2	.				1413
chrV	WBGene00006075	str-7	-1	16097510	16099514		.		16099526		16099530	.		12		16	.				.
chrV	WBGene00006097	str-31	-1	7506895	7508246		.				7508594	.				348	.				.
chrIV	WBGene00006138	str-78	-1	15143741	15147172		.				15147346	.				174	.	15147183	4	0	.				163
chrI	WBGene00006306	sue-1	-1	7360390	7371531		.			7371964	7372039	.			433	508	.	7371531	206	0	.			433	508
chrII	WBGene00006307	suf-1	1	8603795	8606693		.	8603664	8603771			.	131	24			.	8603807	33	350	.	143	36
chrV	WBGene00006309	sul-2	1	8157726	8159854		.		8154019			.		3707			.	8157723	38	0	.		3704
chrV	WBGene00006311	sun-1	-1	13191688	13193524		.			13193788		.			264		.	13193524	1336	2	.			264
chrII	WBGene00006318	sup-9	-1	2684687	2686982		.		2687047	2687045	2687045	.		65	63	63	.				.
chrX	WBGene00006321	sup-12	1	3904571	3907653	Same TSS	.	3901023	3901023	3901023	3901023	.	3548	3548	3548	3548	.	3904571	371	1	.	3548	3548	3548	3548
chrI	WBGene00006324	sup-17	1	8792959	8797287		.	8792528	8792528	8792528	8792528	.	431	431	431	431	.	8792959	709	1	.	431	431	431	431
chrX	WBGene00006351	sur-5	-1	7301312	7305525		.				7305604	.				79	.	7305525	882	2	.				79
chrI	WBGene00006352	sur-6	1	9754111	9757889		.	9752663	9751185	9752663	9752663	.	1448	2926	1448	1448	.	9754113	1391	4	.	1450	2928	1450	1450
chrX	WBGene00006353	sur-7	1	16376521	16379978	Different TSS	.	16376148	16376148			.	373	373			.	16376523	225	1	.	375	375
chrX	WBGene00006364	syd-2	-1	10549061	10555177		.	10555416	10555416		10555416	.	239	239		239	.	10555177	180	0	.	239	239		239
chrX	WBGene00006365	syg-1	-1	2509600	2515316	Same TSS	.	2520588	2520588		2520588	.	5272	5272		5272	.	2515309	45	1	.	5279	5279		5279
chrX	WBGene00006366	sym-1	1	14581585	14584299		.	14581623	14581623		14581623	.	-38	-38		-38	.				.
chrII	WBGene00006367	sym-2	-1	9178453	9188420		.	9188316	9188316		9188318	.	-104	-104		-102	.	9188420	9	0	.	-104	-104		-102
chrX	WBGene00006368	sym-3	1	5776216	5778845	Same TSS	.		5775999			.		217			.	5776216	47	0	.		217
chrX	WBGene00006369	sym-4	-1	14164569	14169630		.	14169691	14169698	14169612	14169607	.	61	68	-18	-23	.	14169550	310	2	.	141	148	62	57
chrX	WBGene00006370	sym-5	1	14577884	14580846		.		14577923		14577917	.		-39		-33	.				.
chrX	WBGene00006372	syx-2	1	13960010	13962743		.				13959923	.				87	.	13960080	122	0	.				157
chrV	WBGene00006373	syx-5	1	11764886	11767206		.	11764747	11764747		11764747	.	139	139		139	.	11764886	491	4	.	139	139		139
chrV	WBGene00006376	syp-2	1	5536685	5537702		.		5536453	5536453	5536453	.		232	232	232	.				.
chrI	WBGene00006379	sys-1	-1	9980156	9984815	Same TSS	.	9984982	9984982		9984982	.	167	167		167	.	9984815	171	1	.	167	167		167
chrII	WBGene00006380	tab-1	1	6803715	6804820		.		6803644			.		71			.				.
chrII	WBGene00006381	tac-1	-1	14752811	14753818		.				14753859	.				41	.	14753799	1317	2	.				60
chrX	WBGene00006384	taf-3	1	16332368	16345951	Different TSS	.	16331645	16331645			.	723	723			.	16332370	110	0	.	725	725
chrI	WBGene00006385	taf-4	1	382836	388850		.	382589	382589	382589	382589	.	247	247	247	247	.	382831	521	0	.	242	242	242	242
chrI	WBGene00006386	taf-5	1	7848970	7853631		.	7849022	7849016		7849022	.	-52	-46		-52	.	7849808	384	462	.	786	792		786
chrX	WBGene00006388	taf-7.1	-1	11836129	11837408		.		11838130			.		722			.	11837410	102	0	.		720
chrX	WBGene00006393	taf-11.1	1	4255130	4256788		.	4255018	4255056	4255018	4255046	.	112	74	112	84	.	4255146	276	1	.	128	90	128	100
chrIII	WBGene00006395	taf-11.3	-1	10503858	10505154		.	10505242	10505242	10505235	10505242	.	88	88	81	88	.	10505152	143	1	.	90	90	83	90
chrIII	WBGene00006396	taf-12	-1	11862307	11869183	Different TSS	.	11870005	11869975	11870005	11870005	.	822	792	822	822	.	11869181	425	1	.	824	794	824	824
chrII	WBGene00006404	tag-10	1	13632585	13636912	Same TSS	.				13632598	.				-13	.	13632575	40	0	.				-23
chrIV	WBGene00006405	itsn-1	1	17119646	17126230	Different TSS	.		17119190	17119190	17119190	.		456	456	456	.	17119648	684	2	.		458	458	458
chrIV	WBGene00006406	srgp-1	1	11570489	11578689	Different TSS	.	11568723	11568723			.	1766	1766			.	11570477	1621	1	.	1754	1754
chrX	WBGene00006408	tag-18	-1	3731905	3733443		.			3733421	3733421	.			-22	-22	.				.
chrX	WBGene00006410	nck-1	-1	4148625	4153419	Different TSS	.	4157966	4157966		4159383	.	4547	4547		5964	.	4153419	320	0	.	4547	4547		5964
chrX	WBGene00006412	nlg-1	-1	13625340	13631047	Same TSS	.			13633905	13632120	.			2858	1073	.	13631096	58	0	.			2809	1024
chrIV	WBGene00006416	sams-5	-1	6277424	6279520	Different TSS	.	6279509	6279509			.	-11	-11			.	6279168	34	0	.	341	341
chrII	WBGene00006429	arrd-3	1	9412421	9414132		.				9412389	.				32	.				.
chrIII	WBGene00006430	tag-51	1	854209	856522		.		854225		854219	.		-16		-10	.				.
chrX	WBGene00006431	tag-52	-1	3674030	3678546		.		3678659	3679022	3679022	.		113	476	476	.	3678544	137	0	.		115	478	478
chrX	WBGene00006432	tag-53	1	14710405	14718713	Same TSS	.				14708473	.				1932	.				.
chrII	WBGene00006433	sdhb-1	-1	9350593	9352738		.				9352742	.				4	.	9352672	1199	5	.				70
chrII	WBGene00006434	prdx-2	1	5378046	5379619	Different TSS	.	5377944	5377938	5377938	5377944	.	102	108	108	102	.	5378825	22500	425	.	881	887	887	881
chrV	WBGene00006436	ttn-1	-1	6120892	6202609	Same TSS	.	6202664	6202664			.	55	55			.	6202609	21	0	.	55	55
chrV	WBGene00006437	mrck-1	-1	6257384	6267174		.	6267544	6267552		6267468	.	370	378		294	.	6267178	294	1	.	366	374		290
chrIV	WBGene00006438	tag-60	1	9119082	9130356	Different TSS	.			9118698	9118698	.			384	384	.	9119084	734	3	.			386	386
chrIII	WBGene00006439	ant-1.1	1	13463062	13464556	Different TSS	.	13463082	13463082	13463082	13463082	.	-20	-20	-20	-20	.				.
chrIV	WBGene00006441	cpna-4	1	15361562	15368228		.				15361284	.				278	.	15361514	46	0	.				230
chrV	WBGene00006442	tag-65	-1	13675976	13678587		.		13678667			.		80			.	13678575	280	1	.		92
chrV	WBGene00006443	pak-2	-1	11036450	11039407	Same TSS	.	11039548	11039548	11039548	11039548	.	141	141	141	141	.	11039405	344	4	.	143	143	143	143
chrII	WBGene00006444	shn-1	-1	11384521	11390798	Same TSS	.	11400516	11400516	11397146	11400542	.	9718	9718	6348	9744	.	11390798	213	0	.	9718	9718	6348	9744
chrI	WBGene00006447	tag-72	-1	10159972	10161875		.		10161945			.		70			.	10161873	354	2	.		72
chrIV	WBGene00006450	tag-77	-1	8503480	8510498		.	8511157	8511157	8511176	8510664	.	659	659	678	166	.	8510536	257	4	.	621	621	640	128
chrIII	WBGene00006452	heh-1	-1	3198461	3199509		.	3200660	3200660	3200650	3200650	.	1151	1151	1141	1141	.	3199507	2989	6	.	1153	1153	1143	1143
chrX	WBGene00006454	aex-4	1	3729280	3731946		.			3729312	3729312	.			-32	-32	.				.
chrV	WBGene00006460	tag-93	-1	10532873	10536211	Different TSS	.	10537004	10537004	10537004	10537004	.	793	793	793	793	.	10535941	670	3	.	1063	1063	1063	1063
chrX	WBGene00006462	tag-97	-1	15369929	15377616	Different TSS	.			15380681	15380688	.			3065	3072	.	15377748	43	0	.			2933	2940
chrIII	WBGene00006463	nduf-2.2	1	6465115	6467156		.		6464430		6464482	.		685		633	.	6465170	742	0	.		740		688
chrV	WBGene00006465	fntb-1	1	14447636	14449576		.		14447629		14447656	.		7		-20	.	14447725	938	5	.		96		69
chrV	WBGene00006467	tag-117	-1	8792674	8795545		.	8796994	8796994			.	1449	1449			.	8795545	224	0	.	1449	1449
chrX	WBGene00006468	rhgf-1	-1	10697797	10711794		.		10711879			.		85			.	10711803	29	0	.		76
chrX	WBGene00006472	tag-123	-1	8418593	8422002		.	8422103	8422103	8422103	8422103	.	101	101	101	101	.	8422002	465	2	.	101	101	101	101
chrII	WBGene00006473	tag-124	1	9591243	9592874		.		9591261		9591263	.		-18		-20	.				.
chrX	WBGene00006477	tag-130	1	8792107	8796041	Same TSS	.		8791951			.		156			.	8792107	40	0	.		156
chrX	WBGene00006479	tmbi-4	1	9150635	9160597		.	9150440	9150460	9150499	9150460	.	195	175	136	175	.	9150637	1667	6	.	197	177	138	177
chrV	WBGene00006481	tag-135	-1	10806107	10807892	Different TSS	.		10808017		10807999	.		125		107	.	10807879	2688	10	.		138		120
chrIV	WBGene00006483	dgk-4	1	8631321	8643991	Same TSS	.		8629872	8630846	8629879	.		1449	475	1442	.	8631327	217	119	.		1455	481	1448
chrV	WBGene00006489	tag-143	-1	10210412	10212103		.		10212421	10212404	10212421	.		318	301	318	.	10212101	161	0	.		320	303	320
chrIV	WBGene00006490	tag-144	1	11038634	11047401	Same TSS	.	11038870	11038870		11038870	.	-236	-236		-236	.	11038641	152	2	.	-229	-229		-229
chrIV	WBGene00006491	acl-3	-1	11650695	11652010		.		11652068			.		58			.	11652000	188	2	.		68
chrX	WBGene00006494	hke-4.2	-1	15505966	15507812		.	15508047	15508047		15508047	.	235	235		235	.	15507812	829	4	.	235	235		235
chrII	WBGene00006495	cpna-1	1	4186669	4208502	Same TSS	.		4184288		4184288	.		2381		2381	.	4186669	288	0	.		2381		2381
chrIII	WBGene00006498	ten-1	1	6820880	6847219	Different TSS	.	6820556	6820564			.	324	316			.	6830337	201	1	.	9781	9773
chrI	WBGene00006503	snx-3	-1	9063708	9064391		.		9064675	9064674	9064674	.		284	283	283	.	9064396	747	4	.		279	278	278
chrI	WBGene00006508	tag-163	-1	5583408	5597335	Different TSS	.				5600474	.				3139	.	5597363	141	0	.				3111
chrIII	WBGene00006513	tag-168	1	1789138	1806612		.		1786135	1786135	1786135	.		3003	3003	3003	.				.
chrII	WBGene00006514	tdp-1	1	8997765	8999663	Same TSS	.		8997629		8997657	.		136		108	.	8997765	1224	10	.		136		108
chrIII	WBGene00006515	tag-170	1	6432129	6433101		.		6431961			.		168			.	6432126	709	8	.		165
chrIII	WBGene00006519	tag-174	1	5081686	5082969		.		5081234		5081234	.		452		452	.	5081688	30335	42	.		454		454
chrII	WBGene00006520	tag-175	1	9323901	9324761		.		9323120		9323120	.		781		781	.	9323896	304	1	.		776		776
chrV	WBGene00006523	tam-1	-1	4958590	4963072		.	4964212	4965852	4965852	4965852	.	1140	2780	2780	2780	.	4963082	123	2	.	1130	2770	2770	2770
chrX	WBGene00006524	tap-1	1	14589567	14591894		.	14589250	14589250		14589250	.	317	317		317	.	14589555	305	0	.	305	305		305
chrIV	WBGene00006527	tax-6	-1	10493176	10501579	Same TSS	.		10506778	10503642	10503642	.		5199	2063	2063	.	10501577	1167	0	.		5201	2065	2065
chrI	WBGene00006528	tba-1	-1	9785769	9787615	Different TSS	.	9788631	9788631	9788596	9788596	.	1016	1016	981	981	.	9787381	2854	31	.	1250	1250	1215	1215
chrI	WBGene00006529	tba-2	-1	12964668	12966865		.	12966857	12966857	12966857	12966857	.	-8	-8	-8	-8	.	12966260	7914	39	.	597	597	597	597
chrII	WBGene00006530	tba-4	1	10918646	10920124		.			10918537	10918528	.			109	118	.	10918646	566	3	.			109	118
chrIII	WBGene00006536	tbb-1	-1	10740766	10742362		.	10742564	10742564	10742564	10742564	.	202	202	202	202	.	10742333	9002	31	.	231	231	231	231
chrIII	WBGene00006537	tbb-2	-1	4015748	4017622		.	4019947	4019947	4019048	4019041	.	2325	2325	1426	1419	.	4017606	11007	59	.	2341	2341	1442	1435
chrX	WBGene00006538	tbb-4	-1	9434393	9436834		.	9436949	9436911			.	115	77			.	9436834	134	0	.	115	77
chrIII	WBGene00006542	tbp-1	1	7383952	7386067		.		7384071			.		-119			.	7383968	300	1000	.		-103
chrIII	WBGene00006543	tbx-2	-1	5130888	5136280		.	5136268	5136268	5136268	5136268	.	-12	-12	-12	-12	.				.
chrIV	WBGene00006561	tcl-2	1	179008	183251		.	177746	177562	177722		.	1262	1446	1286		.	179008	244	0	.	1262	1446	1286
chrII	WBGene00006562	tdc-1	1	8270517	8273533	Same TSS	.				8270243	.				274	.	8270547	439	3	.				304
chrIII	WBGene00006563	teg-1	-1	11312114	11316958		.	11317068	11317069		11317068	.	110	111		110	.	11316956	134	1	.	112	113		112
chrI	WBGene00006565	tfg-1	1	14101265	14104463		.	14101264	14101264		14101264	.	1	1		1	.	14102035	3196	2	.	771	771		771
chrV	WBGene00006567	tgt-2	1	18998314	19000922		.		18998418			.		-104			.	18998316	64	293	.		-102
chrV	WBGene00006570	tig-2	-1	4726705	4730155		.			4730162		.			7		.	4730170	9	0	.			-8
chrI	WBGene00006577	tlf-1	-1	8697917	8701965	Same TSS	.	8702391	8702398	8702398	8702391	.	426	433	433	426	.	8701965	383	1	.	426	433	433	426
chrIII	WBGene00006579	tlk-1	1	9699797	9710184	Different TSS	.	9697551	9697551	9697551	9697551	.	2246	2246	2246	2246	.	9699794	806	4	.	2243	2243	2243	2243
chrIV	WBGene00006580	tlp-1	-1	13701216	13704003		.	13703998	13703998	13703998	13703998	.	-5	-5	-5	-5	.	13703933	9	0	.	65	65	65	65
chrV	WBGene00006582	tmd-2	1	8336638	8340655	Same TSS	.	8332414	8332414		8332415	.	4224	4224		4223	.	8336638	185	1	.	4224	4224		4223
chrX	WBGene00006584	tni-1	-1	11375816	11377406		.	11379288		11379146		.	1882		1740		.	11377406	6204	3	.	1882		1740
chrV	WBGene00006585	tni-3	-1	16833617	16835122		.				16836027	.				905	.	16835106	991	3	.				921
chrIV	WBGene00006586	tni-4	1	5204583	5207130		.			5204414		.			169		.	5204583	593	1	.			169
chrX	WBGene00006587	tnt-2	-1	8721505	8723500	Different TSS	.				8723725	.				225	.	8723498	1991	2	.				227
chrX	WBGene00006588	tnt-3	-1	7937519	7945000	Same TSS	.	7944978	7944978		7948036	.	-22	-22		3036	.	7944661	155	0	.	317	317		3375
chrV	WBGene00006589	tnt-4	-1	1989478	1992888	Same TSS	.	1993022				.	134				.	1992917	341	0	.	105
chrIII	WBGene00006590	toc-1	1	5275186	5277762	Different TSS	.		5275186		5275186	.		0		0	.	5275376	471	3	.		190		190
chrIII	WBGene00006591	toh-1	-1	3804754	3809014		.				3810485	.				1471	.	3809012	263	0	.				1473
chrIII	WBGene00006592	dpy-31	1	7202599	7207601	Same TSS	.	7201676	7201676	7201676	7201676	.	923	923	923	923	.	7202599	182	0	.	923	923	923	923
chrI	WBGene00006593	tol-1	1	444002	461610		.	439571	443347			.	4431	655			.	444002	121	2	.	4431	655
chrI	WBGene00006594	tom-1	1	5546152	5561645	Different TSS	.		5545767	5545767	5545767	.		385	385	385	.	5546123	230	0	.		356	356	356
chrI	WBGene00006595	top-1	1	13292503	13296856	Different TSS	.	13289918	13289942	13289908	13289942	.	2585	2561	2595	2561	.	13292503	2435	3	.	2585	2561	2595	2561
chrII	WBGene00006601	tpi-1	-1	12036767	12039077		.	12040232	12042106	12040257	12040232	.	1155	3029	1180	1155	.	12039075	8900	18	.	1157	3031	1182	1157
chrX	WBGene00006602	tps-1	-1	17467046	17474460	Different TSS	.		17474976	17475076		.		516	616		.	17474460	426	2	.		516	616
chrIII	WBGene00006604	tra-1	-1	11171993	11195108	Same TSS	.				11197228	.				2120	.	11195101	23	0	.				2127
chrIV	WBGene00006606	tra-3	-1	14436337	14444156		.				14444355	.				199	.	14444156	207	0	.				199
chrI	WBGene00006607	tre-1	1	6554730	6558594		.	6554736	6554748	6554865	6554748	.	-6	-18	-135	-18	.				.
chrIV	WBGene00006608	tre-2	-1	6876719	6883431		.	6883400	6883418			.	-31	-13			.	6879419	360	0	.	3981	3999
chrV	WBGene00006613	trm-1	-1	14183109	14185608		.	14185605	14185605		14185605	.	-3	-3		-3	.	14185472	29	1	.	133	133		133
chrIII	WBGene00006614	trp-1	1	8535052	8542671	Different TSS	.			8534160		.			892		.	8535773	37	0	.			1613
chrII	WBGene00006617	tars-1	-1	11691262	11695593	Different TSS	.		11694558	11695215		.		-1035	-378		.	11694013	537	1	.		545	1202
chrII	WBGene00006626	tsn-1	1	4706810	4710166		.	4706583	4706583	4706583	4706583	.	227	227	227	227	.	4706818	2402	7	.	235	235	235	235
chrX	WBGene00006634	tsp-8	-1	14726556	14729412		.				14729371	.				-41	.				.
chrX	WBGene00006635	tsp-9	1	1246012	1247494		.	1244597	1244597		1244597	.	1415	1415		1415	.	1246012	388	3	.	1415	1415		1415
chrX	WBGene00006637	tsp-11	1	9163107	9165950		.	9161549	9161549			.	1558	1558			.	9163118	55	1	.	1569	1569
chrIV	WBGene00006638	tsp-12	-1	10149141	10150582		.	10151570	10151567	10151567	10151567	.	988	985	985	985	.	10150580	1988	8	.	990	987	987	987
chrV	WBGene00006639	tsp-13	1	19154077	19157676		.		19153472			.		605			.	19154086	16	0	.		614
chrX	WBGene00006640	tsp-14	-1	4866653	4874627	Different TSS	.	4882812	4882812	4880126	4883523	.	8185	8185	5499	8896	.	4871029	82	1	.	11783	11783	9097	12494
chrX	WBGene00006643	tsp-17	1	3681155	3684219	Different TSS	.	3680769	3680769	3680769		.	386	386	386		.	3681157	39	0	.	388	388	388
chrX	WBGene00006646	tsp-20	-1	12031530	12033969		.		12038720			.		4751			.	12033967	99	0	.		4753
chrV	WBGene00006648	ttb-1	1	156825	166895		.	155456	155456		156628	.	1369	1369		197	.	156825	218	2	.	1369	1369		197
chrX	WBGene00006649	tth-1	-1	8422426	8423680		.	8426368	8426368		8426368	.	2688	2688		2688	.	8423678	3094	6	.	2690	2690		2690
chrII	WBGene00006655	tub-1	-1	8154044	8156885		.	8157020				.	135				.	8156891	74	0	.	129
chrIII	WBGene00006662	twk-7	-1	8633998	8643659		.				8644951	.				1292	.	8643659	23	0	.				1292
chrIV	WBGene00006663	twk-8	1	9082348	9087551	Same TSS	.			9081341	9079577	.			1007	2771	.	9082346	68	0	.			1005	2769
chrV	WBGene00006668	twk-13	-1	12320168	12332098	Different TSS	.	12332022	12332020		12332020	.	-76	-78		-78	.	12328706	52	0	.	3316	3314		3314
chrX	WBGene00006672	twk-18	1	8988080	8991906		.		8987924			.		156			.	8988082	143	3	.		158
chrX	WBGene00006679	twk-26	-1	3050355	3054403		.				3054514	.				111	.				.
chrIII	WBGene00006683	twk-31	1	11410612	11424563	Same TSS	.	11410572	11410575			.	40	37			.				.
chrV	WBGene00006684	twk-32	1	13796627	13800535		.	13796489		13796453		.	138		174		.				.
chrV	WBGene00006686	twk-34	1	15705040	15709509		.				15704891	.				149	.	15704991	98	0	.				100
chrIV	WBGene00006698	uaf-2	-1	17116726	17118724		.	17118721	17118690	17118721	17118701	.	-3	-34	-3	-23	.	17118516	1232	4	.	205	174	205	185
chrIV	WBGene00006699	uba-1	-1	9989649	9995013	Different TSS	.	9995016	9995204		9995161	.	3	191		148	.	9994924	1022	381	.	92	280		237
chrI	WBGene00006702	ubc-3	1	1698096	1701132		.	1698218	1698182	1698182	1698182	.	-122	-86	-86	-86	.	1698351	3165	6	.	133	169	169	169
chrII	WBGene00006703	ubc-6	1	7479122	7480669	Different TSS	.	7479127	7479124	7479124	7479127	.	-5	-2	-2	-5	.	7479164	8	0	.	37	40	40	37
chrIII	WBGene00006704	ubc-7	-1	9630001	9631085		.	9631353	9631353	9631353	9631353	.	268	268	268	268	.	9631083	4156	16	.	270	270	270	270
chrIV	WBGene00006705	ubc-8	-1	2704691	2707229		.	2708638	2708638	2708631	2708638	.	1409	1409	1402	1409	.	2707234	475	2	.	1404	1404	1397	1404
chrI	WBGene00006707	ubc-12	1	11911315	11912040		.	11911095	11911111		11911111	.	220	204		204	.	11911317	2415	9	.	222	206		206
chrIV	WBGene00006708	ubc-13	-1	2922593	2925689		.	2926249				.	560				.	2925689	473	552	.	560
chrIII	WBGene00006713	ubc-18	-1	7067627	7068512		.	7068947	7068737			.	435	225			.	7068510	2395	203	.	437	227
chrV	WBGene00006714	ubc-19	-1	18686293	18689815		.		18689865			.		50			.	18689734	30	1	.		131
chrIII	WBGene00006715	ubc-20	1	188835	190942		.	188745	188745	188745	188745	.	90	90	90	90	.	188837	3704	13	.	92	92	92	92
chrX	WBGene00006716	ubc-21	1	8869572	8871782		.			8869420		.			152		.	8869609	7	0	.			189
chrI	WBGene00006720	ubc-25	1	10562957	10564903		.	10562861	10562744		10562228	.	96	213		729	.	10562959	310	8	.	98	215		731
chrII	WBGene00006724	ubh-4	-1	8038219	8039545		.		8039488		8039488	.		-57		-57	.				.
chrIII	WBGene00006725	ubl-1	1	3068298	3069204	Different TSS	.	3068160	3068174		3068174	.	138	124		124	.	3068309	36798	93	.	149	135		135
chrIII	WBGene00006727	ubq-1	1	5940197	5943791	Same TSS	.	5939300	5939300	5939249	5939300	.	897	897	948	897	.	5940939	1250	26	.	1639	1639	1690	1639
chrIII	WBGene00006728	ubq-2	-1	12977809	12978428		.	12978859	12978859	12978859	12978859	.	431	431	431	431	.	12978422	101756	371	.	437	437	437	437
chrV	WBGene00006729	ucp-4	1	9334747	9336631		.		9334137			.		610			.	9334749	454	0	.		612
chrI	WBGene00006730	uev-1	1	14790233	14790928		.	14790132	14790132	14790137	14790132	.	101	101	96	101	.	14790233	2144	12	.	101	101	96	101
chrII	WBGene00006737	ulp-2	-1	4955638	4959869		.		4959863		4959863	.		-6		-6	.	4959836	136	0	.		27		27
chrII	WBGene00006739	ulp-4	1	8129908	8133210		.	8126316	8126316	8126316	8126316	.	3592	3592	3592	3592	.	8129908	338	6	.	3592	3592	3592	3592
chrX	WBGene00006741	unc-1	-1	1057548	1062444	Same TSS	.	1062833	1062833	1062830	1062833	.	389	389	386	389	.	1062444	681	4	.	389	389	386	389
chrX	WBGene00006743	unc-3	1	14773297	14783495		.		14773500			.		-203			.				.
chrX	WBGene00006746	unc-6	1	6889649	6897100		.	6889518	6889518	6889518	6889518	.	131	131	131	131	.	6889636	106	0	.	118	118	118	118
chrX	WBGene00006749	unc-9	1	13212321	13215758		.			13210705		.			1616		.	13212321	107	1	.			1616
chrI	WBGene00006751	unc-11	-1	3799127	3805721	Different TSS	.	3806662	3806662	3806662	3806662	.	941	941	941	941	.	3805740	1003	2	.	922	922	922	922
chrI	WBGene00006752	unc-13	1	7422781	7454084	Different TSS	.				7416270	.				6511	.	7422664	47	0	.				6394
chrI	WBGene00006753	unc-14	-1	7122604	7128422		.	7128258	7128258	7128258	7128258	.	-164	-164	-164	-164	.	7128422	65	0	.	-164	-164	-164	-164
chrI	WBGene00006754	unc-15	-1	7376601	7383194	Different TSS	.	7383148	7383152	7383152	7383152	.	-46	-42	-42	-42	.	7380283	2	0	.	2865	2869	2869	2869
chrIII	WBGene00006755	unc-16	1	9546174	9556428	Different TSS	.	9546129	9546129	9546129	9546129	.	45	45	45	45	.	9546218	1407	1	.	89	89	89	89
chrX	WBGene00006757	unc-18	1	7682367	7685632	Same TSS	.	7682596	7682144	7682567	7682596	.	-229	223	-200	-229	.	7682845	292	1	.	249	701	278	249
chrIV	WBGene00006759	unc-22	-1	11972685	12010984	Different TSS	.				12012456	.				1472	.	12010984	139	0	.				1472
chrV	WBGene00006760	unc-23	1	8936375	8939963	Different TSS	.	8936485	8936485	8936485	8936485	.	-110	-110	-110	-110	.	8937381	379	3	.	896	896	896	896
chrIV	WBGene00006761	unc-24	1	7980000	7981990		.	7979842	7979867	7979847	7979847	.	158	133	153	153	.				.
chrIII	WBGene00006762	unc-25	1	12942546	12949798	Different TSS	.			12942549	12942549	.			-3	-3	.				.
chrIV	WBGene00006763	unc-26	-1	13261532	13272490	Same TSS	.	13272600	13272600			.	110	110			.	13272490	131	70	.	110	110
chrX	WBGene00006764	unc-27	1	8789401	8790568		.	8789267	8789279	8789281	8789281	.	134	122	120	120	.	8789403	2752	17	.	136	124	122	122
chrI	WBGene00006765	unc-29	-1	8897604	8901428		.	8902590	8902590		8902583	.	1162	1162		1155	.	8901428	18	0	.	1162	1162		1155
chrIV	WBGene00006766	unc-30	1	13119072	13124363	Same TSS	.				13119069	.				3	.				.
chrIV	WBGene00006767	unc-31	1	12773838	12787489	Different TSS	.		12771729		12771721	.		2109		2117	.	12773845	37	0	.		2116		2124
chrIII	WBGene00006768	unc-32	1	8905538	8911669	Same TSS	.	8905397	8905397	8905397	8905397	.	141	141	141	141	.	8905538	1285	3	.	141	141	141	141
chrIV	WBGene00006769	unc-33	1	3516818	3526598		.	3515951	3515934		3515951	.	867	884		867	.	3516818	426	0	.	867	884		867
chrIII	WBGene00006772	unc-36	-1	8193777	8201138	Different TSS	.	8201681	8201653	8201653	8201653	.	543	515	515	515	.	8201136	28	0	.	545	517	517	517
chrI	WBGene00006773	unc-37	-1	6742294	6745342		.	6745607	6745607		6745607	.	265	265		265	.	6745330	225	72	.	277	277		277
chrI	WBGene00006774	unc-38	-1	4897368	4900978		.		4901017			.		39			.				.
chrV	WBGene00006775	unc-39	1	14373374	14375872		.		14373358			.		16			.				.
chrI	WBGene00006776	unc-40	-1	5679847	5691508		.	5691677	5691677	5691677	5691677	.	169	169	169	169	.	5691506	242	1	.	171	171	171	171
chrV	WBGene00006777	unc-41	-1	9966380	9976202	Different TSS	.		9978504		9978490	.		2302		2288	.	9976207	14	1	.		2297		2283
chrV	WBGene00006778	unc-42	-1	9764621	9769337		.	9769332	9769332		9769332	.	-5	-5		-5	.				.
chrV	WBGene00006782	unc-46	-1	5097094	5098892		.				5098974	.				82	.				.
chrIII	WBGene00006783	unc-47	-1	10183703	10186299		.				10186292	.				-7	.	10186169	31	1	.				123
chrIII	WBGene00006784	unc-49	1	10520578	10532604	Different TSS	.		10520703	10520703	10520703	.		-125	-125	-125	.	10520747	106	1	.		44	44	44
chrV	WBGene00006786	unc-51	-1	19995956	20004456		.	20005768	20005768	20005812	20005812	.	1312	1312	1356	1356	.	20004454	618	3	.	1314	1314	1358	1358
chrI	WBGene00006789	unc-54	-1	14855888	14863529		.	14863517	14863517	14863517	14863517	.	-12	-12	-12	-12	.				.
chrI	WBGene00006790	unc-55	-1	7899032	7903329	Same TSS	.				7904921	.				1592	.				.
chrI	WBGene00006791	unc-57	1	4675136	4679410	Different TSS	.		4674129	4674206	4674132	.		1007	930	1004	.	4675136	346	2	.		1007	930	1004
chrI	WBGene00006793	unc-59	1	13629214	13633485		.	13629055	13629055			.	159	159			.	13629216	624	2	.	161	161
chrV	WBGene00006794	unc-60	1	1474786	1479582	Different TSS	.	1474076	1474795	1474898	1474349	.	710	-9	-112	437	.	1475086	13938	18	.	1010	291	188	737
chrV	WBGene00006795	unc-61	-1	14731080	14734222	Different TSS	.		14734485		14734485	.		263		263	.	14733862	3795	8	.		623		623
chrV	WBGene00006796	unc-62	1	4497449	4511435	Different TSS	.		4491831	4497088		.		5618	361		.	4497449	852	1	.		5618	361
chrI	WBGene00006797	unc-63	1	5141678	5149229		.	5140570	5140570		5140570	.	1108	1108		1108	.	5141678	72	0	.	1108	1108		1108
chrIII	WBGene00006798	unc-64	1	13277160	13284263	Same TSS	.		13268986	13276069	13276069	.		8174	1091	1091	.	13277160	1278	2	.		8174	1091	1091
chrV	WBGene00006801	unc-68	-1	6901669	6929020	Same TSS	.	6930412	6930346		6930346	.	1392	1326		1326	.	6929020	301	0	.	1392	1326		1326
chrIII	WBGene00006802	unc-69	1	10318890	10319930	Same TSS	.	10318960	10318960	10318960	10318960	.	-70	-70	-70	-70	.				.
chrV	WBGene00006803	unc-70	1	6881326	6891385	Different TSS	.	6879779	6879779	6879779	6879779	.	1547	1547	1547	1547	.	6881326	173	0	.	1547	1547	1547	1547
chrI	WBGene00006805	unc-73	-1	3999345	4031629	Different TSS	.	4032590	4032558		4032590	.	961	929		961	.	4011587	98	0	.	21003	20971		21003
chrI	WBGene00006807	unc-75	1	11592293	11601596		.	11591141	11591141	11591093	11591141	.	1152	1152	1200	1152	.	11592239	137	0	.	1098	1098	1146	1098
chrV	WBGene00006808	unc-76	1	15071739	15080127	Different TSS	.	15071550	15071550	15071775	15071775	.	189	189	-36	-36	.	15071859	361	28	.	309	309	84	84
chrX	WBGene00006810	unc-78	-1	3408650	3411669	Same TSS	.	3411713	3411713	3411713	3411713	.	44	44	44	44	.	3411601	1016	0	.	112	112	112	112
chrIII	WBGene00006811	unc-79	1	4066692	4082770	Different TSS	.				4064068	.				2624	.	4066610	46	0	.				2542
chrV	WBGene00006812	unc-80	1	20879823	20898876	Same TSS	.				20879679	.				144	.	20879844	31	0	.				165
chrV	WBGene00006815	unc-83	1	6465048	6487866	Different TSS	.			6462941	6458567	.			2107	6481	.	6465048	229	0	.			2107	6481
chrX	WBGene00006816	unc-84	1	13584705	13589757	Same TSS	.	13584140	13584137	13584140	13584140	.	565	568	565	565	.	13584705	613	1	.	565	568	565	565
chrIII	WBGene00006818	unc-86	-1	8212687	8216265	Same TSS	.	8216220	8216220	8216220	8216220	.	-45	-45	-45	-45	.				.
chrI	WBGene00006819	unc-87	-1	6761229	6767800	Different TSS	.	6769083	6769083	6769083	6769083	.	1283	1283	1283	1283	.	6767798	6493	8	.	1285	1285	1285	1285
chrI	WBGene00006820	unc-89	1	4035746	4090963	Different TSS	.		4035748		4035748	.		-2		-2	.				.
chrI	WBGene00006823	unc-94	-1	5992672	6001101	Different TSS	.	6001101	6001100	6001044	6001100	.	0	-1	-57	-1	.	6000888	275	2	.	213	212	156	212
chrI	WBGene00006824	unc-95	-1	14381349	14384725		.	14384947	14384953		14384947	.	222	228		222	.	14384725	604	0	.	222	228		222
chrX	WBGene00006825	unc-96	-1	611266	621290	Same TSS	.	621749	621749	621749	621749	.	459	459	459	459	.	621290	356	0	.	459	459	459	459
chrX	WBGene00006826	unc-97	1	5593098	5594930		.	5592051	5592051	5592051	5592061	.	1047	1047	1047	1037	.	5593098	277	9	.	1047	1047	1047	1037
chrX	WBGene00006827	unc-98	-1	7570329	7573629		.		7573590	7573626	7573626	.		-39	-3	-3	.				.
chrI	WBGene00006829	unc-101	1	12508439	12513395	Different TSS	.	12508427	12508427			.	12	12			.	12508478	158	1	.	51	51
chrII	WBGene00006831	unc-104	1	6995009	7010579	Same TSS	.	6993126		6994944	6994944	.	1883		65	65	.	6995009	93	2	.	1883		65	65
chrI	WBGene00006833	unc-108	1	3824948	3826517		.	3824476	3824494	3823759	3823759	.	472	454	1189	1189	.	3824950	4234	516	.	474	456	1191	1191
chrV	WBGene00006836	unc-112	-1	14691837	14696918		.	14696814	14696809	14697091	14697091	.	-104	-109	173	173	.	14696639	728	0	.	175	170	452	452
chrX	WBGene00006839	unc-115	1	10146833	10152726	Different TSS	.	10146860	10146860	10146860	10146893	.	-27	-27	-27	-60	.				.
chrIII	WBGene00006840	unc-116	-1	8351177	8355102		.	8356512	8356333			.	1410	1231			.	8355102	1783	0	.	1410	1231
chrIII	WBGene00006843	unc-119	1	10902549	10908831	Different TSS	.	10901922				.	627				.	10906357	744	3	.	4435
chrI	WBGene00006844	unc-120	1	8460219	8463008		.		8459119	8459370	8459119	.		1100	849	1100	.	8460219	299	2	.		1100	849	1100
chrII	WBGene00006853	unc-130	1	11281922	11283890		.		11280197	11281387		.		1725	535		.	11281904	119	0	.		1707	517
chrII	WBGene00006856	usp-14	-1	14485549	14488615		.		14488674		14488674	.		59		59	.	14488613	1304	16	.		61		61
chrX	WBGene00006861	cal-5	-1	5074365	5078039		.			5077844	5078005	.			-195	-34	.				.
chrX	WBGene00006863	gyg-1	1	3537626	3540927	Same TSS	.		3537427	3537427	3535642	.		199	199	1984	.	3537628	984	4	.		201	201	1986
chrII	WBGene00006868	vab-1	1	4571997	4591357	Same TSS	.	4571328	4571328	4571328	4571328	.	669	669	669	669	.	4571997	704	2	.	669	669	669	669
chrIV	WBGene00006869	vab-2	-1	3761187	3766821		.	3767902	3767902			.	1081	1081			.	3766821	449	1	.	1081	1081
chrX	WBGene00006870	vab-3	1	10505926	10518589	Different TSS	.		10505406			.		520			.	10505840	27	0	.		434
chrII	WBGene00006875	vab-9	-1	8636208	8637661		.	8641218	8641222	8642018	8639225	.	3557	3561	4357	1564	.	8637659	192	1	.	3559	3563	4359	1566
chrX	WBGene00006881	vab-15	1	9847219	9849103		.	9846176	9846176	9846176	9846176	.	1043	1043	1043	1043	.	9847219	67	0	.	1043	1043	1043	1043
chrII	WBGene00006882	vab-19	1	2443297	2451145		.				2442501	.				796	.	2443284	151	0	.				783
chrI	WBGene00006888	vbh-1	-1	3158516	3162378	Different TSS	.	3162575	3162567	3162575	3162575	.	197	189	197	197	.	3162387	2406	11	.	188	180	188	188
chrI	WBGene00006889	pfd-3	1	12728162	12729861		.		12728147	12728147	12728178	.		15	15	-16	.				.
chrX	WBGene00006890	vem-1	-1	8087340	8089629	Different TSS	.	8089618	8089618	8089622	8089622	.	-11	-11	-7	-7	.	8088525	2797	0	.	1093	1093	1097	1097
chrII	WBGene00006893	spon-1	1	7116529	7120500		.	7116567	7116567	7116567	7116576	.	-38	-38	-38	-47	.				.
chrX	WBGene00006896	ver-3	1	10992444	10997362		.	10990791	10990791		10990791	.	1653	1653		1653	.	10992419	545	3	.	1628	1628		1628
chrI	WBGene00006902	vet-6	1	13269984	13272770		.	13269836				.	148				.	13269973	339	0	.	137
chrIII	WBGene00006910	vha-1	1	9781157	9781971		.	9780767	9780767	9780767	9780767	.	390	390	390	390	.	9781166	2079	11	.	399	399	399	399
chrIV	WBGene00006912	vha-3	-1	2315424	2315988		.	2316905	2316911	2316902	2316911	.	917	923	914	923	.	2315988	8390	11	.	917	923	914	923
chrII	WBGene00006913	vha-4	-1	7878031	7879284		.	7879450	7879439	7879436	7879436	.	166	155	152	152	.	7879264	851	3	.	186	175	172	172
chrIV	WBGene00006914	vha-5	1	8303955	8307356		.	8302153	8302153	8302153	8302153	.	1802	1802	1802	1802	.	8303955	248	3	.	1802	1802	1802	1802
chrIV	WBGene00006917	vha-8	1	6791061	6792450		.	6790685	6790668	6790668	6790678	.	376	393	393	383	.	6791063	10437	33	.	378	395	395	385
chrII	WBGene00006918	vha-9	-1	10302947	10303655		.	10303824	10303824	10303846	10303803	.	169	169	191	148	.	10303653	2306	25	.	171	171	193	150
chrX	WBGene00006921	vha-12	1	4191068	4193111		.	4190805	4190844	4190859	4190844	.	263	224	209	224	.	4191070	2980	5	.	265	226	211	226
chrX	WBGene00006922	vhl-1	1	11307296	11308257		.	11306801	11306739			.	495	557			.	11307298	215	2	.	497	559
chrII	WBGene00006924	vig-1	1	1321042	1323094	Same TSS	.	1320678	1320678	1320678	1320678	.	364	364	364	364	.	1321044	5529	132	.	366	366	366	366
chrIV	WBGene00006931	vps-26	-1	9339383	9341773	Different TSS	.		9341733	9341733	9341733	.		-40	-40	-40	.	9341632	1015	52	.		101	101	101
chrII	WBGene00006933	vps-35	1	5907793	5911199		.		5907686		5907697	.		107		96	.	5907793	80	104	.		107		96
chrV	WBGene00006935	vars-1	1	8031436	8034994		.		8031370			.		66			.	8031427	65	133	.		57
chrIII	WBGene00006937	wah-1	1	11990067	11999492		.		11989983		11989983	.		84		84	.	11990067	395	293	.		84		84
chrII	WBGene00006940	wee-1.3	-1	9713602	9716410		.	9716732	9716733		9716733	.	322	323		323	.	9716408	896	194	.	324	325		325
chrIV	WBGene00006941	wnk-1	1	9200100	9212216	Different TSS	.	9198458	9198462	9198455	9198462	.	1642	1638	1645	1638	.	9200100	207	0	.	1642	1638	1645	1638
chrX	WBGene00006942	wrk-1	-1	8387414	8392529	Same TSS	.	8398247	8398247			.	5718	5718			.	8392529	253	1	.	5718	5718
chrIII	WBGene00006943	wrm-1	1	5722804	5727068		.	5720721	5720721	5719306		.	2083	2083	3498		.	5722804	210	4	.	2083	2083	3498
chrII	WBGene00006947	wrt-1	1	7531107	7533199		.	7531107	7531123		7531107	.	0	-16		0	.				.
chrX	WBGene00006948	wrt-2	-1	3092385	3094362		.	3094310	3094310		3094338	.	-52	-52		-24	.				.
chrIV	WBGene00006949	wrt-3	-1	9475803	9477329		.			9477279	9477358	.			-50	29	.	9477218	9	0	.			61	140
chrX	WBGene00006950	wrt-4	-1	15752190	15757201		.				15757319	.				118	.	15757201	354	0	.				118
chrIV	WBGene00006951	wrt-5	-1	4050044	4051624	Different TSS	.		4052387			.		763			.	4051623	43	0	.		764
chrX	WBGene00006952	wrt-6	1	3480238	3483648		.	3479915	3479915		3479915	.	323	323		323	.	3480240	313	0	.	325	325		325
chrII	WBGene00006956	wrt-10	-1	7533252	7534466		.	7534471	7534418		7534418	.	5	-48		-48	.	7534352	9	0	.	119	66		66
chrI	WBGene00006958	wve-1	-1	11924776	11929498	Different TSS	.		11930619			.		1121			.	11929500	735	1	.		1119
chrIII	WBGene00006959	xbp-1	1	4193795	4195330	Same TSS	.	4193858	4193858	4193858	4193875	.	-63	-63	-63	-80	.	4193802	26	73	.	-56	-56	-56	-73
chrI	WBGene00006961	xnp-1	-1	4665745	4671739		.	4671825	4671825	4671825	4671825	.	86	86	86	86	.	4671739	695	2	.	86	86	86	86
chrI	WBGene00006963	xpa-1	1	7159712	7160916		.		7158209			.		1503			.	7159719	117	1	.		1510
chrIV	WBGene00006968	yars-1	-1	4710855	4712506	Different TSS	.		4712583			.		77			.	4712504	310	109	.		79
chrIV	WBGene00006970	zag-1	1	3855837	3861118		.	3854759	3854759			.	1078	1078			.	3855839	439	1	.	1080	1080
chrIII	WBGene00006971	zak-1	-1	6853054	6856750	Different TSS	.		6857600	6857534		.		850	784		.	6856753	64	0	.		847	781
chrIV	WBGene00006974	zen-4	1	6118213	6122066	Different TSS	.	6118078	6118078			.	135	135			.	6118210	703	2	.	132	132
chrI	WBGene00006976	zhp-3	-1	8529375	8531332	Same TSS	.				8531553	.				221	.	8531330	72	1	.				223
chrI	WBGene00006978	zig-1	1	9847398	9850071		.	9846558	9846510	9846510	9846510	.	840	888	888	888	.	9847397	667	1	.	839	887	887	887
chrX	WBGene00006980	zig-3	1	7930690	7931760		.			7930689		.			1		.				.
chrX	WBGene00006981	zig-4	1	7925389	7926541		.	7925385	7925385	7925385	7925385	.	4	4	4	4	.				.
chrI	WBGene00006984	zig-7	-1	4790644	4792502		.		4792518			.		16			.				.
chrIII	WBGene00006985	zig-8	1	13119719	13133829		.	13119720	13119720	13119719	13119720	.	-1	-1	0	-1	.				.
chrIII	WBGene00006986	zip-1	1	12335654	12345237	Different TSS	.	12335630	12335630	12335630	12335630	.	24	24	24	24	.	12336806	53	0	.	1176	1176	1176	1176
chrII	WBGene00006994	zyg-9	1	8457767	8464514		.		8457535	8457617	8456842	.		232	150	925	.	8457767	319	4	.		232	150	925
chrII	WBGene00006996	zyg-11	1	8017629	8020708		.	8016326	8016326	8016326	8016326	.	1303	1303	1303	1303	.	8017629	778	5	.	1303	1303	1303	1303
chrII	WBGene00006999	zyx-1	1	13056744	13071460	Different TSS	.		13052065		13056861	.		4679		-117	.	13064816	578	1	.		12751		7955
chrIII	WBGene00007000	tufm-1	-1	2811907	2814963		.		2815121		2815121	.		158		158	.	2814961	1072	8	.		160		160
chrIV	WBGene00007006	npr-3	1	11459970	11463173		.			11454402		.			5568		.	11459962	84	0	.			5560
chrIV	WBGene00007007	mak-2	1	884909	890187	Different TSS	.	884975	884973		884964	.	-66	-64		-55	.	885346	652	0	.	371	373		382
chrIII	WBGene00007008	rfp-1	1	8358553	8362373	Same TSS	.	8358386	8358386	8358386	8358386	.	167	167	167	167	.	8358553	294	8	.	167	167	167	167
chrI	WBGene00007009	wwp-1	1	537125	542176	Same TSS	.	536942	536945	536945	536945	.	183	180	180	180	.	537125	1103	194	.	183	180	180	180
chrV	WBGene00007017	mdt-17	-1	20250784	20267209	Same TSS	.		20267067			.		-142			.	20267208	18	133	.		-141
chrIII	WBGene00007019	mdt-19	1	2598052	2603212		.		2597330			.		722			.	2598050	854	3	.		720
chrII	WBGene00007022	mdt-22	1	10301103	10301828		.		10301137		10301110	.		-34		-7	.				.
chrV	WBGene00007023	mdt-27	-1	9209437	9212322		.		9212649			.		327			.	9212320	98	0	.		329
chrI	WBGene00007024	mdt-28	1	7057169	7059348	Same TSS	.	7057111		7057111	7057111	.	58		58	58	.	7057199	6159	15	.	88		88	88
chrIII	WBGene00007027	ssl-1	1	12714465	12743828	Different TSS	.	12713990	12713979		12713971	.	475	486		494	.	12714465	553	14	.	475	486		494
chrII	WBGene00007028	trr-1	-1	11661516	11675863	Same TSS	.		11676034		11676034	.		171		171	.	11675863	52	0	.		171		171
chrV	WBGene00007029	mys-1	-1	7081526	7084873		.		7084857			.		-16			.	7084644	542	0	.		213
chrIII	WBGene00007030	epc-1	-1	12599529	12608366		.	12608462	12608462	12608459	12608498	.	96	96	93	132	.	12608366	12	0	.	96	96	93	132
chrII	WBGene00007041	tag-180	-1	11322985	11329365	Different TSS	.			11329127	11329129	.			-238	-236	.	11329365	74	0	.			-238	-236
chrI	WBGene00007042	pbrm-1	1	7495433	7503574	Different TSS	.	7494805	7494805	7494805	7494805	.	628	628	628	628	.	7495433	409	3	.	628	628	628	628
chrII	WBGene00007044	cpna-5	-1	7711818	7718538	Different TSS	.	7720574	7720574		7720574	.	2036	2036		2036	.	7718538	69	0	.	2036	2036		2036
chrI	WBGene00007047	wts-1	-1	10291885	10297913		.	10297879	10297879	10297879	10297879	.	-34	-34	-34	-34	.				.
chrIII	WBGene00007048	tag-182	1	6375326	6379124		.	6375199	6375199	6375195	6375199	.	127	127	131	127	.	6375326	545	3	.	127	127	131	127
chrI	WBGene00007053	tag-192	-1	4685869	4698576		.	4703224	4699317	4699283	4699272	.	4648	741	707	696	.	4698576	63	0	.	4648	741	707	696
chrI	WBGene00007054	scpl-1	-1	10086381	10102001	Different TSS	.			10104163	10104894	.			2162	2893	.	10102001	651	1	.			2162	2893
chrV	WBGene00007055	tag-196	1	8594890	8597541		.	8594661	8592795	8594661	8593034	.	229	2095	229	1856	.	8594892	613	1	.	231	2097	231	1858
chrIII	WBGene00007056	crn-7	1	8268544	8270664		.		8268449		8268579	.		95		-35	.				.
chrIV	WBGene00007058	dmd-6	1	14616575	14623936	Different TSS	.	14614487	14614487	14611622	14611622	.	2088	2088	4953	4953	.	14616575	336	1	.	2088	2088	4953	4953
chrX	WBGene00007059	vps-52	1	7565275	7568103		.		7565079			.		196			.	7565276	192	1	.		197
chrII	WBGene00007063	2L52.1	1	1867	4663		.		880			.		987			.	1848	112	1	.		968	1848
chrII	WBGene00007064	2RSSE.1	1	15268136	15273238		.	15256015	15256015			.	12121	12121			.	15268136	598	2	.	12121	12121
chrX	WBGene00007069	6R55.2	1	17714380	17714756		.	17714524		17714512	17714524	.	-144		-132	-144	.				.
chrV	WBGene00007071	AC3.5	1	10388447	10393480		.				10388433	.				14	.	10388492	243	1	.				59
chrIV	WBGene00007089	B0001.4	-1	12135058	12137327		.		12137587		12137521	.		260		194	.	12137325	211	211	.		262		196
chrIV	WBGene00007091	B0001.6	1	12156816	12164252		.		12156856			.		-40			.	12159448	321	0	.		2592
chrI	WBGene00007094	B0019.2	1	12773647	12782247		.		12773515			.		132			.	12773649	89	0	.		134
chrV	WBGene00007096	B0024.3	1	10287539	10289247		.			10287307		.			232		.	10287541	28	0	.			234
chrV	WBGene00007103	crm-1	-1	10322262	10332087	Different TSS	.			10332233	10332233	.			146	146	.	10332087	91	1	.			146	146
chrIV	WBGene00007105	B0035.1	1	11310950	11312475	Same TSS	.	11310836	11310836		11310836	.	114	114		114	.	11310950	319	0	.	114	114		114
chrIV	WBGene00007107	pfd-4	1	11315183	11315855		.		11315101			.		82			.	11315185	4440	10	.		84
chrIV	WBGene00007112	B0035.13	-1	11304699	11306698		.				11306697	.				-1	.				.
chrX	WBGene00007116	B0198.3	-1	12042548	12049279		.				12050214	.				935	.	12049277	60	0	.				937
chrV	WBGene00007119	B0250.2	-1	20476717	20479058		.		20479215			.		157			.	20478906	6	0	.		309
[truncated: 4,354 more rows]
