# Supplementary material for: Condensin controls recruitment of RNA polymerase II to achieve nematode X-chromosome dosage compensation
Source: eLife. 2013 Jun 18;2:e00808. doi: 10.7554/eLife.00808 (PMC3687364; doi:10.7554/eLife.00808)
Supplement: Figure 1—source data 3. — Annotation of transcription start sites for non-coding RNAs. DOI: http://dx.doi.org/10.7554/eLife.00808.006 [file elife00808s003.xls]

## Sheet: microRNA
Chromosome	WBGeneID	Gene Name	Strand	WS225 converted to WS230 Primary Transcript Begin	WS225 converted to WS230 Primary Transcript End	TSS	Difference Between TSS and Primary Transcript
chrI	WBGene00003338	mir-244	-1	4684317	4684415	4684494	79
chrI	WBGene00003260	mir-1	-1	6172664	6172759	6173274	515
chrI	WBGene00003307	mir-79	1	9332938	9333035	9332797	141
chrII	WBGene00003300	mir-72	1	2452843	2452941	2452722	121
chrII	WBGene00002993	lin-4	1	5902231	5902324	5902089	142
chrII	WBGene00077709	mir-1822	1	6015508	6015601	6015457	51
chrII	WBGene00003288	mir-60	-1	6328670	6328767	6328813	46
chrII	WBGene00003313	mir-85	1	8393502	8393607	8393473	29
chrII	WBGene00003346	mir-252	-1	11446799	11446896	11446914	18
chrII	WBGene00003263	mir-35	1	11537544	11537640	11537461	83
chrII	WBGene00003264	mir-36	1	11537649	11537745	Polycistronic with mir-35	NA
chrII	WBGene00003265	mir-37	1	11537769	11537866	Polycistronic with mir-35	NA
chrII	WBGene00003266	mir-38	1	11537866	11537963	Polycistronic with mir-35	NA
chrII	WBGene00003267	mir-39	1	11538025	11538111	Polycistronic with mir-35	NA
chrII	WBGene00003268	mir-40	1	11538120	11538211	Polycistronic with mir-35	NA
chrII	WBGene00003269	mir-41	1	11538244	11538340	Polycistronic with mir-35	NA
chrII	WBGene00003273	mir-45	-1	11880881	11880976	11881068	92
chrII	WBGene00003270	mir-42	1	11889748	11889842	11889632	116
chrII	WBGene00003271	mir-43	1	11889847	11889944	Polycistronic with mir-42	NA
chrII	WBGene00003272	mir-44	1	11889960	11890055	Polycistronic with mir-42	NA
chrII	WBGene00003305	mir-77	1	12519204	12519303	12519020	184
chrIII	WBGene00003322	mir-229	1	2172442	2172556	2172340	102
chrIII	WBGene00003292	mir-64	1	2172838	2172947	Polycistronic with mir-229	NA
chrIII	WBGene00003293	mir-65	1	2172992	2173091	Polycistronic with mir-229	NA
chrIII	WBGene00003294	mir-66	1	2173098	2173196	Polycistronic with mir-229	NA
chrIII	WBGene00003304	mir-76	1	3142037	3142133	3140519	1518
chrIII	WBGene00003295	mir-67	-1	5931304	5931402	5931478	76
chrIII	WBGene00194828	mir-2214	1	7278651	7278714	7278649	2
chrIII	WBGene00003308	mir-80	-1	8865189	8865286	8865570	284
chrIII	WBGene00003331	mir-238	-1	8867247	8867344	8868378	1034
chrIII	WBGene00003318	mir-90	-1	8873906	8874003	8874092	89
chrIII	WBGene00003314	mir-86	-1	11936537	11936634	11936969	335
chrIII	WBGene00003274	mir-46	1	13660414	13660510	13660306	108
chrIV	WBGene00003286	mir-58	1	3233251	3233347	3232908	343
chrIV	WBGene00003321	mir-228	1	5562016	5562113	5561888	128
chrIV	WBGene00003311	mir-83	1	7841619	7841716	7841515	104
chrIV	WBGene00003325	mir-232	-1	10994148	10994245	10994289	44
chrIV	WBGene00003279	mir-51	-1	11025992	11026091	11026197	106
chrIV	WBGene00003319	mir-124	1	11871715	11871810	11871580	135
chrIV	WBGene00003280	mir-52	1	14033983	14034082	14033832	151
chrV	WBGene00045353	mir-792	-1	3042090	3042179	3042225	46
chrV	WBGene00003349	mir-255	1	5440623	5440732	5440573	50
chrV	WBGene00003289	mir-61	-1	11770042	11770138	11770201	63
chrV	WBGene00003315	mir-87	-1	12038669	12038762	12039000	238
chrV	WBGene00003039	lin-58	-1	14364397	14364494	14364616	122
chrV	WBGene00003335	mir-241	-1	14366173	14366268	14366597	329
chrX	WBGene00045360	mir-800	-1	380920	380992	381097	105
chrX	WBGene00003301	mir-73	1	2368757	2368855	2368744	13
chrX	WBGene00003302	mir-74	1	2369035	2369131	Polycistronic with mir-73	NA
chrX	WBGene00003303	mir-75	1	2372446	2372542	2372235	211
chrX	WBGene00003309	mir-81	1	2431065	2431172	2430993	72
chrX	WBGene00003310	mir-82	-1	2435251	2435347	2435416	69
chrX	WBGene00003341	mir-247	1	4756941	4757038	4756923	18
chrX	WBGene00003323	mir-230	1	5803857	5803954	5803806	51
chrX	WBGene00045352	mir-791	1	5809314	5809398	5809239	75
chrX	WBGene00023456	mir-360	1	5919114	5919223	5919053	61
chrX	WBGene00003334	mir-240	1	7882574	7882670	7882528	46
chrX	WBGene00003330	mir-237	1	8154035	8154133	8153969	66
chrX	WBGene00045350	mir-788	-1	8485241	8485318	8485379	61
chrX	WBGene00003277	mir-49	1	9989224	9989320	9989073	151
chrX	WBGene00003333	mir-239.2	-1	11791235	11791332	11791388	56
chrX	WBGene00003332	mir-239.1	1	11792378	11792475	11792046	332
chrX	WBGene00003290	mir-62	1	12692536	12692593	12692013	523
chrX	WBGene00003283	mir-55	-1	13144757	13144854	Polycistronic with mir-54	NA
chrX	WBGene00003282	mir-54	-1	13144926	13145024	13145182	158
chrX	WBGene00003275	mir-47	1	13921182	13921278	13920753	429
chrX	WBGene00002285	let-7	-1	14744104	14744202	14744410	208
chrX	WBGene00189970	F46F2.8	-1	15242715	15242774	15242882	108
chrX	WBGene00003312	mir-84	-1	16022333	16022407	16022453	46
chrX	WBGene00003291	mir-63	-1	17598689	17598792	17598830	38

## Sheet: snoRNA
Chromosome	WBGeneID	Gene Name	Strand	WS225 converted to WS230 Begin	WS225 converted to WS230 End	TSS	Difference Between TSS and WB Start
chrI	WBGene00023193	Y74C9A.6	-1	3747	3909	3908	-1
chrI	WBGene00044925	Y37E3.20	1	2085040	2085158	2085040	0
chrI	WBGene00044926	Y39G10AR.24	1	2410192	2410256	2410125	67
chrI	WBGene00045093	Y23H5B.10	-1	2514170	2514313	2514376	63
chrI	WBGene00044928	Y71F9AM.7	1	2935787	2935922	2935715	72
chrI	WBGene00044929	R12E2.17	1	4175999	4176066	4175919	80
chrI	WBGene00045082	F46F11.12	-1	5611666	5611820	5611891	71
chrI	WBGene00044930	T19B4.8	1	5707049	5707122	5706982	67
chrI	WBGene00044933	ZK484.9	-1	6082740	6082807	6082870	63
chrI	WBGene00044934	T27A3.9	-1	6105681	6105756	6105822	66
chrI	WBGene00044935	T08B2.13	-1	6212698	6212826	6212900	74
chrI	WBGene00044964	F22D6.16	-1	7091583	7091717	7091777	60
chrI	WBGene00045156	T02E1.9	1	8224468	8224538	8224396	72
chrI	WBGene00045150	ZK265.10	-1	8259431	8259492	8259567	75
chrI	WBGene00045376	F25H5.9	1	9176320	9176446	9176248	72
chrI	WBGene00045375	C17D12.8	1	11609306	11609436	11609216	90
chrI	WBGene00044975	F47G4.9	-1	14058827	14058898	14058896	-2
chrII	WBGene00044937	ZK546.18	-1	4942389	4942513	4942578	65
chrII	WBGene00045083	C04G6.12	-1	5105148	5105222	5105287	65
chrII	WBGene00044704	C18A3.12	1	5701643	5701707	5701642	1
chrII	WBGene00044936	T24H7.6	1	6248686	6248824	6248616	70
chrII	WBGene00044938	C27H5.9	-1	7183969	7184037	7184103	66
chrII	WBGene00045157	K02C4.8	1	8075457	8075591	8075392	65
chrII	WBGene00045115	K02C4.7	1	8091657	8091730	8091656	1
chrII	WBGene00045160	C41C4.11	-1	8107144	8107218	8107282	64
chrII	WBGene00045114	W01C9.6	1	8547158	8547287	8547089	69
chrII	WBGene00045147	T10B9.11	-1	9774705	9774775	9774842	67
chrII	WBGene00045074	R166.7	-1	10545139	10545269	10545326	57
chrII	WBGene00014447	M106.6	1	10840257	10840331	10840182	75
chrII	WBGene00014506	T06D8.11	1	11224118	11224194	11224116	2
chrII	WBGene00045127	W03C9.9	1	11960834	11960895	11960752	82
chrII	WBGene00045139	F01D5.12	-1	14018280	14018367	14018365	-2
chrII	WBGene00045377	F19H8.6	1	14617068	14617135	14616999	69
chrII	WBGene00045141	Y53F4B.47	-1	15025738	15025817	15025835	18
chrIII	WBGene00023020	F30H5.4	1	502802	502887	502723	79
chrIII	WBGene00023189	Y71D11A.7	1	1122495	1122567	1122422	73
chrIII	WBGene00045118	T04A8.17	-1	4689599	4689736	4689803	67
chrIII	WBGene00045089	C05H8.3	-1	5653822	5653924	5653922	-2
chrIII	WBGene00045132	ZK643.9	1	8937690	8937820	8937630	60
chrIII	WBGene00045124	C07A9.14	1	9717296	9717374	9717299	-3
chrIII	WBGene00045378	H04D03.5	1	10432246	10432379	10432177	69
chrIII	WBGene00045149	W05B2.9	-1	10976564	10976647	10976663	16
chrIV	WBGene00023183	Y55F3BR.9	-1	867056	867133	867131	-2
chrIV	WBGene00023467	Y38F2AR.14	-1	2408507	2408634	2408693	59
chrIV	WBGene00044947	F32E10.10	1	7574111	7574180	7574046	65
chrIV	WBGene00023083	H09I01.2	1	8253080	8253151	8253011	69
chrIV	WBGene00045136	D1046.6	1	8927252	8927380	8927186	66
chrIV	WBGene00045121	C46C2.8	-1	9191245	9191317	9191385	68
chrIV	WBGene00044970	F38E11.14	-1	9477612	9477682	9477759	77
chrIV	WBGene00045109	C33A12.21	-1	9511378	9511449	9511450	1
chrIV	WBGene00045154	C10C6.8	-1	11474037	11474169	11474246	77
chrIV	WBGene00077461	F12F6.11	-1	11549771	11549842	11549911	69
chrIV	WBGene00045153	F11A10.9	1	12086687	12086806	12086613	74
chrIV	WBGene00077462	JC8.15	-1	13238908	13239053	13239123	70
chrV	WBGene00045084	K11C4.6	1	6889058	6889127	6888983	75
chrV	WBGene00045055	C16D9.11	-1	8228880	8228949	8228948	-1
chrV	WBGene00022932	C16D9.10	-1	8247868	8247941	8247940	-1
chrV	WBGene00044957	C08D8.3	1	8349088	8349167	8349088	0
chrV	WBGene00044958	ZK994.7	1	8500558	8500624	8500541	17
chrV	WBGene00044974	C27H6.5	-1	9970180	9970247	9970327	80
chrV	WBGene00045071	T03F7.8	1	11314240	11314314	11314173	67
chrV	WBGene00014397	F55A11.10	1	11782973	11783063	11782896	77
chrV	WBGene00014290	C51F7.3	1	12303689	12303764	12303578	111
chrV	WBGene00014541	W04D2.7	1	12491261	12491327	12491260	1
chrV	WBGene00045126	C14C10.8	-1	12596829	12596959	12597036	77
chrV	WBGene00045159	D1086.14	1	14092557	14092636	14092553	4
chrV	WBGene00045137	F56A12.6	1	14362361	14362436	14362230	131
chrV	WBGene00045129	Y75B12B.12	-1	15190959	15191076	15191141	65
chrV	WBGene00045140	T06C12.16	-1	15873836	15873907	15873967	60
chrV	WBGene00023429	W08G11.6	1	16370199	16370335	16370124	75
chrV	WBGene00045120	Y43F8C.22	-1	19643020	19643157	19643220	63
chrX	WBGene00045176	C53B7.8	1	6867898	6867968	6867832	66
chrX	WBGene00045158	M163.14	1	14478394	14478457	14478362	32
chrX	WBGene00045171	K09E9.5	1	15619423	15619553	15619363	60
