# Supplementary material for: Condensin controls recruitment of RNA polymerase II to achieve nematode X-chromosome dosage compensation
Source: eLife. 2013 Jun 18;2:e00808. doi: 10.7554/eLife.00808 (PMC3687364; doi:10.7554/eLife.00808)
Supplement: Figure 4—source data 1. — DOI: http://dx.doi.org/10.7554/eLife.00808.024 [file elife00808s004.xls]

## Sheet: Emb__DCC.Mutant-vs-Control.RNAi
Chromosome	WBGeneID	Gene Name	Strand	True TSS Begin	True TSS End	Uniquely mappable bases within gene body (excluding 300 bp on either end)	Control RNAi Embryo: Gene Body Expression	DCC Mutant Embryo: Gene Body Expression	Ratio: DCC Mutant / Control RNAi	DESeq p-value DCC Mutant vs Control RNAi Embryos	Wild-Type Embryo: Gene Body Expression	.	Control RNAi Embryo: 3' - Maximum 200bp GRO-seq Signal Average	Control RNAi Embryos: 3'-Pausing Ratio	DCC Mutant Embryo: 3' - Maximum 200bp GRO-seq Signal Average	DCC Mutant Embryo: 3'-Pausing Ratio	.	Control RNAi Embryo: 5' - Maximum GRO-seq Signal Average	Control RNAi Embryo: 5'-Pausing Ratio	Control RNAi Embryo: Paused?	DCC Mutant Embryo: 5' - Maximum GRO-seq Signal Average	DCC Mutant Embryo: 5'-Pausing Ratio	DCC Mutant Embryo: Paused?	Wild-Type Embryo: 5' - Maximum GRO-seq Average	Wild-Type Embryo: 5' - Pausing Ratio	Wild-Type Embryo: Paused?
chrV	WBGene00000003	aat-2	-1	9244389	9247545	2547	29.0151	19.2589	0.663755	0.0120128	22.8956	.	44.9934	1.55069	38.9276	2.02128	.	14.3567	0.4948		15.5667	0.808283		14.8533	0.648743
chrX	WBGene00000004	aat-3	1	2554029	2557718	2908	38.6867	49.2426	1.27286	8.58945e-06	34.0444	.	121.077	3.12967	143.227	2.90859	.	33.7567	0.872565		50.6767	1.02912		34.2733	1.00673
chrI	WBGene00000006	aat-5	-1	2571778	2577231	4170	4.51799	3.81343	0.844055	0.957005	5.08633	.	16.8263	3.72429	17.1239	4.49043	.	3.78333	0.837394		3.88667	1.01921		2.9	0.570156
chrX	WBGene00000018	abl-1	-1	10605769	10624265	16662	23.0672	35.7223	1.54862	4.46738e-14	22.7577	.	109.13	4.73095	154.19	4.31635	.	4.38	0.18988		8.44333	0.23636		10.0333	0.440877
chrV	WBGene00000031	abu-8	-1	5192977	5195103	467	2.51178	0.971092	0.386616	0.0185042	4.20343	.	2.93333	1.16783	1.59333	1.64076	.	28.9333	11.5191		26.6267	27.4193		24.0733	5.72707
chrX	WBGene00000039	acn-1	-1	5092250	5099854	6991	19.0313	26.108	1.37185	5.2598e-08	16.4848	.	56.97	2.9935	107.55	4.11943	.	3.11667	0.163766		7.04667	0.269905		2.05333	0.124559
chrX	WBGene00000040	aco-1	1	11339656	11343504	3248	34.6253	58.4543	1.6882	7.3874e-15	41.6033	.	110.627	3.19497	268.307	4.59003	.	7.98	0.230467		23.5333	0.402594		10.5	0.252384
chrIII	WBGene00000041	aco-2	1	7973398	7977260	3262	30.5578	26.3098	0.860984	0.949105	33.737	.	178.54	5.8427	145.913	5.54597	.	20.18	0.660388		19.6033	0.745097		14.24	0.422089
chrV	WBGene00000063	act-1	1	11078577	11082479	2142	33.6487	46.0955	1.3699	0.0098384	36.1431	.	206.593	6.13971	227.897	4.94401	.	6.03	0.179205		7.25333	0.157355		4.22667	0.116943
chrV	WBGene00000064	act-2	-1	11076719	11078503	288	69.4549	98.2917	1.41519	0.000596405	91.2708	.	546.57	7.86943	625.087	6.35951	.	64.4567	0.928037		84.91	0.863858		55.4	0.606985
chrV	WBGene00000065	act-3	-1	11071666	11074475	995	47.2206	54.8116	1.16076	0.000725769	57.9302	.	255.627	5.41346	158.157	2.88546	.	29.3167	0.620845		35.1267	0.640862		39.24	0.677367
chrX	WBGene00000066	act-4	1	4960587	4964385	2427	158.802	236.595	1.48987	4.06074e-13	219.375	.	368.637	2.32136	505.103	2.13489	.	166.204	1.04661		324.396	1.3711		218.535	0.996168
chrIII	WBGene00000067	act-5	-1	13604238	13606143	1168	22.5976	41.7988	1.8497	4.0152e-06	29.8827	.	50.1522	2.21936	51.3333	1.22811	.	5.75667	0.254747		10.05	0.240438		5.68	0.190076
chrIII	WBGene00000068	acy-1	1	4722090	4730835	8107	17.9068	15.6791	0.875595	0.87172	17.1963	.	70.3867	3.93072	78.4267	5.00199	.	9.73333	0.543555		9.53	0.607815		10.2533	0.596254
chrIII	WBGene00000070	acy-3	-1	3774875	3786539	10947	13.4947	12.1789	0.902489	0.755899	12.8874	.	66.6733	4.94069	53.9133	4.4268	.	9.51	0.704719		6.93333	0.569292		5.42667	0.421084
chrX	WBGene00000074	adm-2	1	13687254	13695721	6955	12.2331	37.7613	3.08682	5.78217e-50	12.1501	.	72.7917	5.9504	218.083	5.77532	.	16.78	1.37169		29.6667	0.785638		9.06	0.745672
chrX	WBGene00000075	adm-4	-1	7794993	7798443	2781	4.44588	5.64977	1.27079	0.0220553	4.76735	.	29.2567	6.58062	48.48	8.58089	.	2.95333	0.664285		3.85333	0.682034		2.65333	0.556564
chrI	WBGene00000079	adr-1	1	7772757	7777572	3270	35.0784	26.7089	0.761404	0.392761	32.6737	.	0	0	0	0	.	14.0667	0.401006		13.5067	0.5057		10.5	0.321359
chrX	WBGene00000086	aex-3	-1	751210	760628	8669	7.7904	14.4657	1.85686	3.56879e-16	6.64252	.	25.3167	3.24973	36.3733	2.51446	.	5.88333	0.755203		8.81	0.609028		10.0333	1.51047
chrX	WBGene00000092	ags-3	-1	5289696	5298217	7879	11.6532	14.8399	1.27346	2.41233e-05	11.2596	.	73.4448	6.30255	118.659	7.99592	.	27.2167	2.33555		36.4667	2.45734		19.2067	1.70581
chrII	WBGene00000094	agt-2	-1	5371789	5373372	978	4.66718	2.88446	0.61803	0.235046	6.12065	.	21.3533	4.57521	18.6067	6.45066	.	3.15333	0.67564		1.83667	0.636746		2.9	0.473806
chrI	WBGene00000095	aha-1	-1	10193916	10197174	2595	27.7108	25.2636	0.911688	0.595504	22.8963	.	188.39	6.79843	301.32	11.927	.	13.7867	0.49752		19.1933	0.759723		11.7133	0.511581
chrV	WBGene00000098	air-1	1	8221351	8223567	1582	19.2048	14.5297	0.756566	0.303045	18.2592	.	87.4367	4.55285	51.3733	3.53574	.	2.82	0.146838		5.04	0.346875		6.28	0.343937
chrI	WBGene00000099	air-2	1	5937167	5938887	1120	8.97679	6.27098	0.698578	0.282924	12.1286	.	63.2	7.04038	30.78	4.90832	.	4.03	0.448936		1.63	0.259927		4.59333	0.37872
chrII	WBGene00000101	aka-1	-1	7472685	7478763	5090	19.073	16.7197	0.876619	0.881639	21.0248	.	130.153	6.82396	147.367	8.81393	.	9.44333	0.495116		8.32667	0.498014		9.18	0.436628
chrV	WBGene00000102	akt-1	1	10247176	10252870	5078	8.6669	6.00492	0.692857	0.330525	8.18748	.	35.6833	4.1172	30.7233	5.11636	.	5.87333	0.677674		6.24333	1.0397		5.8	0.708399
chrX	WBGene00000105	alg-1	1	13948326	13956187	7214	87.0746	170.945	1.9632	1.13238e-27	91.8468	.	148.074	1.70054	258.626	1.51292	.	44.1067	0.506539		81.7733	0.478362		44.76	0.487333
chrII	WBGene00000106	alg-2	1	873262	878961	4698	26.0016	23.0866	0.887893	0.675585	33.9338	.	264.433	10.1699	233.857	10.1295	.	8.34333	0.320878		6.49	0.281115		10.38	0.30589
chrIII	WBGene00000107	alh-1	1	5077342	5080636	2673	9.41826	6.35933	0.675214	0.0908249	9.05612	.	45.539	4.83518	29.0909	4.57452	.	4.67	0.495845		1.73333	0.272565		2.65333	0.292988
chrII	WBGene00000112	alh-6	-1	1306247	1310373	3077	17.333	13.9209	0.803144	0.59706	20.4007	.	105.58	6.09129	111.533	8.01195	.	0.193333	0.0111541		2.04333	0.146782		0.966667	0.047384
chrII	WBGene00000114	alh-8	1	11728972	11731163	1591	16.9208	13.857	0.818933	0.755279	30.8642	.	83.5754	4.93921	63.42	4.57675	.	16.1723	0.955764		15.8716	1.14539		15.5541	0.503951
chrX	WBGene00000116	alh-10	-1	7140459	7143597	2477	7.77594	13.4832	1.73397	1.20992e-06	6.86799	.	27.16	3.49283	42.9467	3.18519	.	92.0267	11.8348		136.043	10.0898		64.5867	9.40402
chrIII	WBGene00000118	alh-12	1	7453898	7455917	1409	6.55536	3.49574	0.533265	0.0257209	6.03194	.	9.92105	1.51343	5.2757	1.50918	.	4.84333	0.738836		2.57333	0.736134		4.22667	0.700715
chrIV	WBGene00000120	aly-1	1	9107689	9109736	1447	34.8708	40.5055	1.16159	0.00418318	36.7305	.	131.013	3.75711	97.04	2.39572	.	46.6367	1.33741		38.86	0.959375		37.8933	1.03166
chrIV	WBGene00000122	aly-3	1	12123108	12124788	1080	47.9898	34.481	0.718507	0.0961765	49.3417	.	164.62	3.43031	137.26	3.98074	.	56.4267	1.17581		24.72	0.716916		46.8867	0.950245
chrIV	WBGene00000123	ama-1	1	4247601	4258166	9872	20.9083	24.0135	1.14852	0.000628371	24.7603	.	285.034	13.6326	240.254	10.005	.	19.2467	0.920529		25.7167	1.07092		29.8267	1.20461
chrV	WBGene00000139	amx-3	-1	20898906	20903513	3391	3.81392	4.47567	1.17351	0.0532992	4.31377	.	5.28947	1.38689	8.99342	2.0094	.	2.4	0.629274		2.86	0.63901		1.44667	0.33536
chrI	WBGene00000140	anc-1	1	4320964	4359106	20198	27.8111	22.1376	0.795998	0.327735	24.2535	.	124.28	4.46872	106.92	4.82979	.	14.35	0.515981		8.92667	0.403236		12.4067	0.511542
chrIII	WBGene00000143	apc-2	1	8080360	8083630	2670	11.0723	4.30637	0.388932	6.91501e-07	11.9202	.	22.41	2.02397	8.57	1.99008	.	7.95	0.718009		5.72667	1.32981		13.66	1.14595
chrV	WBGene00000146	ape-1	1	11674215	11685259	10395	42.3054	33.4621	0.790967	0.256148	41.0024	.	155.656	3.67935	158.777	4.74497	.	27.56	0.651454		31.92	0.953914		32.4967	0.792555
chrX	WBGene00000149	apl-1	-1	5112403	5122946	9929	39.7067	63.7672	1.60596	1.13869e-15	42.0776	.	172.413	4.34216	359.263	5.63398	.	14.5233	0.365765		18.25	0.286197		18.22	0.43301
chrI	WBGene00000150	apm-1	-1	5342181	5345278	2495	25.1633	23.1788	0.921132	0.555186	20.4144	.	90.0133	3.57716	98.1167	4.23304	.	10.9867	0.436614		13.8267	0.596523		6.88	0.337017
chrX	WBGene00000157	aps-2	1	4458131	4459242	511	32.316	44.3209	1.37148	6.44576e-05	28.4814	.	227.1	7.02747	326.363	7.36364	.	6.44667	0.199488		10.2467	0.231192		7.24667	0.254435
chrI	WBGene00000158	apg-1	1	14405785	14417916	9109	23.2802	19.2233	0.825735	0.576686	21.0121	.	164.577	7.06938	196.987	10.2473	.	10	0.429549		5.79	0.301197		6.52	0.310297
chrIII	WBGene00000160	apb-1	-1	2583965	2597210	11657	21.5439	19.2343	0.892796	0.640217	19.6914	.	10.75	0.498982	6.29221	0.327135	.	9.45	0.43864		7.80333	0.405699		8.94	0.454006
chrII	WBGene00000162	apd-3	-1	3532529	3547431	12942	15.4633	13.0218	0.842107	0.845286	14.7981	.	99.9045	6.46073	94.1573	7.23075	.	9.59333	0.620392		8.22333	0.631506		13.52	0.913631
chrX	WBGene00000164	apm-3	1	954849	957760	2311	11.3827	14.2904	1.25544	0.00465448	11.3081	.	84.4	7.41474	93.6667	6.55454	.	5.27	0.462982		8.90667	0.623264		18.18	1.6077
chrX	WBGene00000166	apt-9	1	11068537	11071859	2722	1.26157	2.45206	1.94365	0.00127957	1.13409	.	7.42	5.88155	11.6	4.73072	.	2.07	1.64081		1.8	0.734077		1.08667	0.958182
chrII	WBGene00000170	aqp-2	-1	9258853	9262086	2633	172.152	186.051	1.08074	0.00321995	175.715	.	566.583	3.29119	775.257	4.16691	.	160.923	0.934776		208.457	1.12043		91.2733	0.519439
chrII	WBGene00000178	aqp-10	-1	9768392	9770209	1201	28.0649	29.373	1.04661	0.092712	26.8093	.	73.1667	2.60705	72.69	2.47472	.	7.06333	0.251678		7.77667	0.264755		10.3933	0.387676
chrIII	WBGene00000179	aqp-11	1	13672770	13674644	1274	16.6217	14.3462	0.8631	0.982221	17.281	.	55.4333	3.33501	49.2533	3.43321	.	11.7867	0.709115		11.7633	0.819964		7.24667	0.419343
chrIV	WBGene00000181	ard-1	1	11131291	11133764	1536	12.348	8.10612	0.656473	0.0557352	12.4434	.	33.5769	2.71922	26.2603	3.23956	.	226.907	18.376		178.343	22.0011		207.493	16.675
chrIII	WBGene00000182	arf-1.2	1	5715740	5717538	1135	123.867	119.211	0.962405	0.170897	133.051	.	352.705	2.84744	264.117	2.21555	.	178.273	1.43923		216.01	1.812		159.397	1.19801
chrIV	WBGene00000183	arf-3	1	7982251	7983888	974	80.8409	75.0128	0.927907	0.390904	73.5544	.	436.113	5.39471	390.067	5.2	.	56.8833	0.703646		46.2167	0.616117		47.1733	0.641339
chrIV	WBGene00000184	arf-6	1	16946963	16949514	1821	28.7301	21.3333	0.742543	0.294079	23.8391	.	128.417	4.46976	195.367	9.15781	.	8.22	0.286111		4.09	0.191719		2.65333	0.111302
chrIV	WBGene00000186	ark-1	-1	12622061	12635273	12148	21.6317	15.7158	0.72652	0.0369755	17.7947	.	82.0833	3.79459	92.42	5.88069	.	14.09	0.65136		15.7067	0.999416		12.0533	0.677355
chrIV	WBGene00000192	arl-8	1	14797544	14799278	1134	31.0631	29.1587	0.938695	0.41104	35.5952	.	101.187	3.25747	98.5366	3.37932	.	7.26667	0.233933		9.23667	0.316772		6.64	0.186542
chrX	WBGene00000195	arr-1	1	949786	954230	3800	18.3233	28.2589	1.54224	1.02956e-09	20.8897	.	91.9245	5.01681	89.2028	3.15662	.	10.2133	0.557396		20.5833	0.728383		8.56667	0.41009
chrII	WBGene00000196	aars-1	-1	11460099	11464001	3277	5.48627	1.95133	0.355675	2.08067e-06	4.74947	.	28.52	5.19843	20.8433	10.6816	.	8.06333	1.46973		3.19333	1.63649		6.52	1.37279
chrI	WBGene00000197	aars-2	1	3982993	3986918	3324	10.7643	7.79437	0.724096	0.479909	13.4486	.	51.03	4.74067	52.18	6.69457	.	7.67667	0.713161		7.91	1.01483		8.45333	0.628568
chrI	WBGene00000199	arx-1	-1	2883498	2895172	9175	18.8357	19.5715	1.03906	0.0282631	19.5204	.	122.11	6.4829	87.3121	4.46118	.	64.0467	3.40028		28.7867	1.47085		44.0933	2.25883
chrV	WBGene00000200	arx-2	-1	10335241	10338713	2777	19.3758	14.0133	0.72324	0.161154	17.1869	.	91.2033	4.70708	75.3533	5.37726	.	4.16	0.214701		3.33333	0.237869		4.11333	0.23933
chrIII	WBGene00000201	arx-3	-1	12052328	12058476	3184	29.3007	26.7646	0.913445	0.614163	34.9317	.	124.744	4.25736	152.449	5.69592	.	11.6064	0.396113		10.8404	0.405028		9.76596	0.279573
chrIII	WBGene00000204	arx-6	1	4878493	4879661	567	30.0168	25.597	0.852757	0.992724	32.5097	.	128.783	4.29038	82.7667	3.23345	.	9.68667	0.322709		8.68	0.339102		7.48667	0.23029
chrX	WBGene00000207	asb-2	1	4469525	4471455	1312	18.4775	26.1307	1.41419	2.53163e-05	19.8765	.	118.346	6.40489	156.102	5.9739	.	9.31544	0.50415		15.245	0.583412		10.6913	0.537885
chrV	WBGene00000214	asp-1	-1	19049094	19051474	1753	16.4341	48.1363	2.92905	3.31946e-32	26.1061	.	54.3299	3.30592	123.265	2.56075	.	2.27667	0.138533		7.53667	0.156569		1.93333	0.0740568
chrX	WBGene00000216	asp-3	1	6791134	6792676	940	5.21489	27.7074	5.31314	1.25359e-33	7.81596	.	45.2267	8.6726	133.94	4.83408	.	3.90667	0.749136		12.37	0.44645		0.36	0.0460596
chrX	WBGene00000217	asp-4	-1	13218908	13221380	1870	34.6594	47.8227	1.37979	0.013284	37.3428	.	129.9	3.74791	170.927	3.57417	.	19.4533	0.561272		30.24	0.632335		23.06	0.617522
chrII	WBGene00000220	atf-2	1	8748306	8753886	4980	75.5524	88.1059	1.16616	7.54946e-05	69.5174	.	297.587	3.93881	289.687	3.28794	.	29.6567	0.392531		48.7367	0.55316		26.1933	0.376788
chrX	WBGene00000221	atf-5	-1	14809088	14810754	1066	17.9765	100.531	5.59237	2.67526e-77	21.8705	.	76.9033	4.27798	293.433	2.91882	.	11.8633	0.659934		63.8367	0.634992		13.64	0.62367
chrX	WBGene00000222	atf-6	1	12480698	12484811	3511	15.0513	24.0655	1.5989	7.00324e-10	14.0362	.	92.1	6.11909	116.28	4.83181	.	7.47667	0.496747		9.96667	0.414147		7.84	0.558557
chrIV	WBGene00000224	atgp-1	1	17268881	17272147	2666	54.5988	52.9627	0.970033	0.148673	53.4066	.	144.723	2.65067	150.623	2.84395	.	15.5733	0.285232		16.8767	0.318652		12.4267	0.23268
chrII	WBGene00000225	atgp-2	-1	14640021	14645439	4431	11.7532	7.78639	0.66249	0.0202034	11.6152	.	33.9467	2.88829	33.7633	4.3362	.	4.85	0.412653		3.4	0.436659		3.5	0.301329
chrV	WBGene00000226	atl-1	-1	9634837	9645630	8782	17.1447	12.2773	0.716098	0.230283	13.6586	.	94.8556	5.53266	47.9333	3.90423	.	1.19333	0.0696037		2.04333	0.166432		0.84	0.0614996
chrIII	WBGene00000229	atp-2	1	5228178	5230505	1727	61.529	40.1251	0.652133	0.0932534	67.3219	.	270.2	4.39143	180.653	4.50226	.	22.51	0.365844		14.97	0.373083		18.9533	0.281533
chrI	WBGene00000230	atp-3	-1	5428546	5429904	758	26.3015	15.1412	0.575678	0.00442142	23.7216	.	133.373	5.07095	84.1333	5.5566	.	9.69	0.368421		9.03	0.596388		7.36667	0.310546
chrIII	WBGene00000231	atx-2	1	10460902	10467953	6363	21.965	23.0684	1.05024	0.0969579	28.4583	.	54.0395	2.46026	71.09	3.08171	.	3.58	0.162987		0.863333	0.037425		1.93333	0.0679357
chrII	WBGene00000240	pah-1	-1	8762613	8765090	1877	16.8298	23.6905	1.40765	1.63584e-05	16.6894	.	23.8667	1.41812	37.5967	1.587	.	13.5367	0.804328		28.99	1.2237		21.14	1.26667
chrIV	WBGene00000242	bbs-2	1	7934071	7937734	3062	5.27237	4.21897	0.800204	0.652421	3.62182	.	22.81	4.32633	14.6967	3.48347	.	3.87075	0.734157		2.94218	0.697368		3.19728	0.882783
chrV	WBGene00000244	bbs-8	-1	6762459	6765023	1964	7.25535	8.94196	1.23246	0.0176229	6.55855	.	17.27	2.38031	24.5133	2.74138	.	6.66667	0.918863		5.41667	0.605759		4.70667	0.717638
chrIV	WBGene00000247	bec-1	-1	5661131	5665449	3602	27.0872	24.7282	0.912912	0.708042	29.5496	.	84.7033	3.12706	92.33	3.73379	.	18.1667	0.670674		18.1267	0.733036		21.26	0.719469
chrIII	WBGene00000248	ben-1	-1	3538280	3542291	2888	26.6652	20.523	0.769657	0.280166	24.1624	.	144.36	5.4138	216.787	10.5631	.	8.89333	0.333519		8.18	0.398577		12.7867	0.529197
chrX	WBGene00000262	bra-1	1	13598188	13599605	817	11.0851	30.7852	2.77718	2.17374e-17	12.9106	.	40.0433	3.61237	141.343	4.59128	.	4.46	0.402343		14.8367	0.481942		5.67333	0.439431
chrIII	WBGene00000264	brc-1	-1	3853087	3863058	3403	5.84984	4.56303	0.780027	0.341668	7.06788	.	0	0	0	0	.	1.77333	0.303142		2.5	0.547881		2.3	0.325416
chrIV	WBGene00000266	bre-1	1	8986911	8990428	2889	23.6599	15.9619	0.67464	0.0182461	18.7615	.	143.777	6.0768	88.93	5.57138	.	49.21	2.07989		52.3833	3.28177		38.82	2.06913
chrI	WBGene00000272	bro-1	1	5186945	5188619	1040	33.6942	45.087	1.33812	0.0407413	24.4558	.	65.8867	1.95543	49.7267	1.1029	.	22.64	0.671925		27.14	0.601947		15.1667	0.620167
chrII	WBGene00000274	btf-1	1	13199709	13215640	13653	6.91035	6.29437	0.910861	0.586232	6.9658	.	45.9899	6.65522	41.8322	6.64597	.	257.85	37.3136		252.86	40.1724		242.717	34.8441
chrI	WBGene00000275	bub-1	1	7251790	7255223	2833	20.7797	12.9836	0.62482	0.0043552	20.5789	.	138.033	6.64269	57.25	4.40941	.	5.06	0.243506		4.28333	0.329904		8.58667	0.417256
chrV	WBGene00000285	cal-1	-1	12514857	12518808	3341	6.38985	2.83673	0.443942	8.67352e-05	3.51392	.	22.4433	3.51234	13.42	4.73081	.	4.57667	0.71624		2.64	0.93065		3.13333	0.891692
chrII	WBGene00000289	cam-1	-1	9295877	9313309	16392	52.3789	39.5433	0.754948	0.181124	48.326	.	438.28	8.36749	252.317	6.38076	.	3.63986	0.069491		6.98601	0.176667		8.09091	0.167423
chrIV	WBGene00000292	cap-1	-1	7228326	7230334	1395	23.7846	17.1287	0.720159	0.166839	22.6903	.	336.797	14.1603	193.047	11.2704	.	5.50333	0.231382		4.36333	0.254739		4.71333	0.207724
chrII	WBGene00000293	cap-2	1	10868956	10870928	1372	42.8291	43.0496	1.00515	0.0996022	36.4964	.	304.867	7.11822	252.913	5.87493	.	12.2633	0.286332		10.17	0.236239		5.92	0.162208
chrX	WBGene00000294	cas-1	-1	16807385	16815497	7505	31.7792	51.5322	1.62157	2.21433e-15	36.4281	.	150.97	4.75059	336.207	6.5242	.	14.7467	0.464035		19.2333	0.373229		42.9967	1.18032
chrIV	WBGene00000301	cav-1	1	9772342	9773454	512	330.292	281.438	0.85209	0.964226	387.176	.	1285.45	3.89187	1229.33	4.36804	.	210.48	0.637254		233.793	0.830708		177.183	0.45763
chrIII	WBGene00000366	cbp-1	1	9764792	9774721	8963	88.2501	123.016	1.39394	1.48953e-10	99.2702	.	408.983	4.63436	459.882	3.7384	.	16.34	0.185156		35.9	0.291833		20.02	0.201672
chrI	WBGene00000368	ccb-1	-1	3641708	3648102	4939	12.5353	12.5632	1.00222	0.120538	12.3574	.	69.88	5.57464	77.2067	6.14548	.	18.61	1.4846		14.72	1.17168		8.1	0.65548
chrIII	WBGene00000369	ccf-1	-1	11918727	11920328	1001	30.3731	24.481	0.806009	0.616942	27.6379	.	164.013	5.39993	108.685	4.43954	.	7.56333	0.249014		7.74	0.316163		5.56	0.201173
chrI	WBGene00000371	cco-1	1	9788728	9789956	628	29.8662	31.2683	1.04694	0.327332	33.2962	.	487.443	16.3209	355.343	11.3643	.	36.37	1.21776		25.6867	0.821492		29.4067	0.883184
chrIV	WBGene00000376	ccr-4	1	12361359	12371804	9702	29.9503	29.6491	0.989944	0.0887784	33.5045	.	173.31	5.78658	202.747	6.8382	.	6.62	0.221033		9.76	0.329183		14.52	0.433374
chrII	WBGene00000377	cct-1	1	8185229	8187551	1722	47.4103	24.7785	0.522639	8.36721e-07	46.856	.	203.54	4.29316	119.523	4.82368	.	15.3467	0.323699		7.81	0.315193		13.54	0.288971
chrII	WBGene00000378	cct-2	1	8927432	8929753	1721	43.3414	29.1575	0.67274	0.0174868	45.4137	.	288.033	6.64569	163.86	5.61983	.	8.4	0.19381		5.41667	0.185773		5.92	0.130357
chrII	WBGene00000379	cct-4	1	8283423	8285661	1638	55.33	30.1413	0.544756	3.13063e-06	53.0046	.	124.637	2.25261	77.7967	2.58106	.	8.12667	0.146876		5.10667	0.169424		7	0.132064
chrIII	WBGene00000381	cct-6	-1	5853488	5855855	1767	51.105	38.2487	0.748434	0.178586	56.5323	.	311.087	6.08721	196.393	5.13464	.	14.1667	0.277207		9.22333	0.241141		8.20667	0.145168
chrI	WBGene00000382	cdc-6	-1	4268070	4270483	1813	12.0626	6.95698	0.576739	0.00848918	9.62107	.	90.1667	7.47489	49.65	7.13672	.	3.7	0.306733		2.81	0.403911		1.81333	0.188475
chrII	WBGene00000383	cdc-14	-1	5587606	5593688	5437	47.8065	43.0396	0.900288	0.618315	51.3078	.	48.3233	1.01081	133.143	3.09351	.	21.4067	0.447777		20.7867	0.482966		21.0133	0.409554
chrI	WBGene00000386	cdc-25.1	-1	6469387	6471963	1976	6.02328	2.8879	0.479457	0.180194	5.24646	.	18.4933	3.07031	14.45	5.00363	.	2.81667	0.46763		2.95	1.0215		3.62667	0.69126
chrV	WBGene00000387	cdc-25.2	1	1577554	1584934	6460	49.2945	34.8933	0.707855	0.242904	51.5516	.	132.293	2.68373	213.887	6.12973	.	23.1033	0.46868		17.9	0.512992		16.4	0.318128
chrII	WBGene00000390	cdc-42	1	7615645	7617884	1636	57.9927	58.3521	1.0062	0.120535	52.8619	.	190.057	3.27725	201.307	3.44986	.	20.2267	0.34878		23.8367	0.408497		14.8533	0.280984
chrX	WBGene00000391	cdd-1	-1	8208700	8211093	1789	1.93879	8.08385	4.16953	4.76993e-15	2.72275	.	21.9367	11.3146	56.8833	7.03667	.	3.57333	1.84307		14.42	1.7838		1.80667	0.663545
chrX	WBGene00000393	cdf-1	-1	6499872	6505110	4634	15.637	25.2116	1.6123	4.15748e-11	16.191	.	55.5369	3.55163	125.82	4.99056	.	9.32667	0.596447		11.6567	0.462354		8.68667	0.536513
chrIII	WBGene00000395	cdh-3	-1	7741208	7754812	12991	18.693	15.2078	0.813559	0.720024	14.3215	.	137.277	7.34375	86.4184	5.68249	.	8.84667	0.473261		3.18667	0.209541		4.33333	0.302576
chrIII	WBGene00000396	cdh-4	1	4515424	4536957	20787	49.2186	38.278	0.777716	0.205776	44.6625	.	202.48	4.1139	194.34	5.07706	.	15.3393	0.311657		9.44286	0.246691		13.8214	0.309464
chrX	WBGene00000401	cdh-9	1	16594982	16601969	6206	11.1763	16.4378	1.47078	3.2787e-08	9.8806	.	27.4295	2.45426	46.6833	2.84	.	11.14	0.996754		15.9067	0.967688		6.62667	0.670675
chrIII	WBGene00000405	cdk-1	1	9747321	9748767	846	22.2719	10.7642	0.483309	9.70333e-05	18.5686	.	71.5533	3.21272	59.6233	5.53905	.	5.26	0.236172		6.88	0.639157		10.9933	0.59204
chrX	WBGene00000406	cdk-4	-1	13515785	13519027	2481	17.2044	34.4101	2.00008	3.87358e-17	16.0915	.	97.4233	5.66271	173.107	5.03069	.	11.1267	0.646736		18.6633	0.542379		8.93333	0.555159
chrIII	WBGene00000407	cdk-5	-1	13464583	13466247	1064	10.2345	6.81344	0.665733	0.134517	11.0028	.	18.1333	1.77179	19.1688	2.81339	.	1.70667	0.166756		2.53333	0.371814		0.72	0.0654378
chrI	WBGene00000408	cdk-7	-1	2281116	2291192	6729	10.343	10.7274	1.03716	0.0471875	14.0963	.	63.3267	6.12266	77.5433	7.22855	.	7.06667	0.683232		9.65	0.899568		11.8333	0.839464
chrI	WBGene00000409	cdk-8	1	8702500	8705790	2665	9.27767	5.94259	0.640526	0.0453783	9.29719	.	39.16	4.22089	23.09	3.88551	.	2.28667	0.24647		3.70333	0.623185		2.41333	0.259577
chrII	WBGene00000411	cdl-1	1	10784972	10787206	1634	43.2264	41.4731	0.959438	0.230886	52.5095	.	241.883	5.59573	206.33	4.97503	.	23.2533	0.537942		24.73	0.596291		28.52	0.54314
chrI	WBGene00000413	cdt-1	-1	3223164	3228043	4149	9.76247	5.35997	0.549038	0.00036878	10.9634	.	89.1167	9.12849	74.6133	13.9205	.	3.17	0.324713		2.46333	0.45958		4.11333	0.375189
chrIII	WBGene00000414	cec-1	1	8425385	8428508	2504	36.4487	27.0974	0.743441	0.194687	34.401	.	141.916	3.89359	133.507	4.92693	.	21.1533	0.580359		40.9467	1.51109		23.32	0.677888
chrIV	WBGene00000416	ced-2	1	1596052	1601620	3555	12.2924	9.40225	0.764883	0.285552	14.7269	.	65	5.28782	58.17	6.18682	.	5.19	0.422212		3.47333	0.369415		7.13333	0.484376
chrIV	WBGene00000417	ced-3	-1	13199206	13206023	5384	12.6615	9.14255	0.722075	0.0816836	13.9569	.	33.5306	2.64823	36.1033	3.94893	.	3.31333	0.261686		5.73333	0.627104		3.74	0.267968
chrIV	WBGene00000419	ced-5	1	10483935	10492932	8264	10.5716	8.09112	0.765361	0.245743	10.2663	.	71.8067	6.79239	50.7167	6.26819	.	3.92667	0.371434		3.44333	0.42557		2.05333	0.200006
chrIII	WBGene00000420	ced-6	1	5594527	5598393	3197	21.3133	15.8004	0.741343	0.13352	20.0901	.	57.47	2.69644	53.7733	3.40328	.	74.79	3.50908		58.91	3.72838		102.6	5.107
chrIII	WBGene00000421	ced-7	-1	9570131	9580228	8021	22.3328	23.7353	1.0628	0.0122694	23.6651	.	118.06	5.28639	107.01	4.50847	.	10.4967	0.470011		9.08333	0.382693		11.3533	0.479749
chrIII	WBGene00000425	ced-11	1	9118706	9125073	5754	12.7932	8.39251	0.656014	0.0863234	12.4654	.	31.4262	2.45648	20.4631	2.43826	.	10.7433	0.83977		6.66667	0.794359		9.52	0.763713
chrII	WBGene00000432	ceh-7	-1	8703318	8704522	604	6.87583	9.64321	1.40248	0.0910112	6.74669	.	12.4433	1.80972	11.9767	1.24198	.	5.70333	0.829476		8.02	0.831673		4.34	0.643279
chrIII	WBGene00000437	ceh-13	1	7554810	7558142	2710	32.2494	22.8068	0.707201	0.160517	23.7871	.	166.447	5.16123	104.567	4.58488	.	11.6133	0.36011		12.3867	0.543112		10.9733	0.461315
chrIII	WBGene00000439	ceh-16	1	8622598	8625920	2712	10.6702	7.85122	0.73581	0.434149	8.54794	.	30.0633	2.81751	21.64	2.75626	.	4.84667	0.454226		6.27667	0.799451		5.8	0.678526
chrIII	WBGene00000443	ceh-20	1	6979151	6981733	1973	62.8872	49.8715	0.793031	0.517627	52.1351	.	241.223	3.83581	197.977	3.96973	.	35.63	0.56657		32.78	0.657289		28.3733	0.544227
chrIII	WBGene00000448	ceh-26	1	8065364	8071356	5327	18.5586	14.6787	0.79094	0.427871	15.419	.	140.065	7.54719	125.655	8.56036	.	14.4767	0.780053		9.75333	0.664454		11.5467	0.74886
chrV	WBGene00000449	ceh-27	-1	11661535	11665078	2764	38.0872	27.7319	0.728116	0.0706043	31.9825	.	68.5733	1.80043	61.1667	2.20564	.	9.63667	0.253016		9.18333	0.331147		8.2	0.256391
chrX	WBGene00000451	ceh-30	1	3063601	3065541	1340	11.0731	13.4228	1.21219	0.176372	9.83209	.	48.4555	4.37595	77.0367	5.73926	.	6.9	0.62313		12.1133	0.902447		4.7	0.478027
chrV	WBGene00000453	ceh-32	-1	11701743	11705531	3188	51.3725	39.9804	0.778245	0.382315	39.9283	.	159.86	3.11178	142.18	3.55624	.	13.2533	0.257985		16.8567	0.421623		10.02	0.25095
chrV	WBGene00000455	ceh-34	-1	5315497	5319558	3411	24.6829	19.8747	0.805199	0.684717	21.9991	.	142.267	5.76377	121.697	6.1232	.	5.11	0.207026		12.6467	0.636321		7.24	0.329104
chrX	WBGene00000457	ceh-36	-1	14183380	14186515	2534	9.10517	9.61129	1.05559	0.36288	9.63615	.	22.6867	2.49162	25.89	2.69371	.	2.85	0.313009		2.19667	0.228551		2.29333	0.237993
chrII	WBGene00000459	ceh-38	1	6951637	6955366	3129	43.8912	56.923	1.29691	2.57901e-06	42.7963	.	147.247	3.35481	261.079	4.58653	.	13.9345	0.317478		14.469	0.254185		9.98621	0.233343
chrX	WBGene00000460	ceh-39	-1	1854142	1856278	1533	17.5577	37.9067	2.15898	3.47659e-17	21.9478	.	46.1033	2.62581	94.87	2.50272	.	15.3333	0.87331		25.6267	0.676045		9.42	0.4292
chrI	WBGene00000466	cel-1	1	9665242	9668655	2804	24.9021	24.8684	0.998647	0.192539	20.5374	.	72.8567	2.92572	85.76	3.44855	.	20.2233	0.812113		24.4733	0.984114		24.2667	1.18158
chrI	WBGene00000468	ces-1	1	8633918	8636038	1490	18.8832	17.3409	0.918325	0.849178	15.1013	.	46.99	2.48845	46.32	2.67114	.	2.61	0.138218		4.40667	0.254119		1.68667	0.11169
chrI	WBGene00000469	ces-2	1	14960535	14965344	3922	45.6105	72.9946	1.60039	9.9312e-06	42.7024	.	215.744	4.73014	292.453	4.00651	.	12.2733	0.26909		25.5167	0.349569		14.1267	0.330816
chrII	WBGene00000472	cey-1	-1	11039391	11042935	2921	124.305	122.682	0.986944	0.078887	134.317	.	827.62	6.65798	1037.47	8.4566	.	60.2533	0.484722		79.7733	0.650244		59.3667	0.441991
chrIII	WBGene00000475	cey-4	-1	10866847	10869008	1447	16.7225	12.6379	0.755739	0.355668	25.4955	.	84.8967	5.07678	96.8633	7.66453	.	10.0867	0.603178		8.01667	0.634337		10.64	0.417328
chrV	WBGene00000478	cfz-2	-1	3441498	3445693	3533	62.9597	43.3118	0.687929	0.015426	63.0576	.	281.182	4.46606	200.327	4.62522	.	50.7167	0.805542		45.0933	1.04113		43.02	0.682233
chrIII	WBGene00000479	cgh-1	-1	7495639	7498006	1767	67.8138	65.4615	0.965312	0.250891	68.2575	.	213.32	3.14567	283.197	4.32615	.	50.8833	0.750339		49.5267	0.756577		45.3667	0.66464
chrV	WBGene00000480	cgp-1	-1	118043	122938	3862	10.2209	11.6709	1.14187	0.0513214	15.9102	.	47.0667	4.60496	58.7967	5.03789	.	8.7973	0.860719		15.2905	1.31014		25.4797	1.60148
chrX	WBGene00000482	chd-3	-1	12846360	12854191	7147	29.8103	44.6102	1.49647	1.11438e-11	34.4538	.	181.443	6.0866	248.54	5.57137	.	15.7367	0.527894		22.4433	0.503099		16.3	0.473097
chrX	WBGene00000484	che-2	1	481369	486505	4236	3.87831	7.37771	1.9023	9.11591e-09	3.36308	.	26.6367	6.86812	55.4867	7.52085	.	2.28667	0.589605		3.05333	0.413859		1.20667	0.358798
chrI	WBGene00000485	che-3	-1	8062006	8082615	19350	3.04633	3.31307	1.08756	0.0331502	2.35876	.	19.12	6.2764	15.7333	4.74886	.	4.65667	1.52861		3.51	1.05944		5.07333	2.15085
chrV	WBGene00000490	che-11	-1	12144276	12150699	5818	4.88656	3.46339	0.708758	0.160841	4.25627	.	21.5967	4.41961	12.7167	3.67174	.	1.97	0.403147		1.84333	0.532234		1.32667	0.311697
chrI	WBGene00000492	che-13	-1	10506989	10515514	7570	4.90964	4.96962	1.01222	0.174116	3.62404	.	27.3633	5.57339	23.3	4.68849	.	1.38	0.281079		1.8	0.362201		0.966667	0.266737
chrI	WBGene00000493	che-14	1	5746639	5754281	7010	9.28188	8.17967	0.881251	0.861558	7.80385	.	38.62	4.16079	27.7467	3.39215	.	4.85	0.522523		5.48	0.669954		4.58667	0.587744
chrI	WBGene00000500	chn-1	-1	6181316	6183912	1067	19.7723	10.4541	0.528724	0.000102889	18.8416	.	127.371	6.44189	54.4767	5.21105	.	2.88	0.145659		2.15333	0.20598		3.50667	0.186113
chrI	WBGene00000502	chp-1	-1	5103583	5104978	795	26.683	13.661	0.511974	0.000135518	36.0805	.	88.1867	3.30497	80.32	5.87951	.	101.827	3.81616		64.5833	4.72757		100.973	2.79856
chrX	WBGene00000503	cht-1	-1	3397594	3400433	2239	52.0909	86.473	1.66004	3.09147e-12	63.5893	.	169.36	3.25124	306.93	3.54943	.	12.8767	0.247196		31.59	0.365316		23.9367	0.376426
chrIII	WBGene00000506	cic-1	-1	2394319	2401271	3716	12.2795	11.5187	0.938046	0.494731	11.4769	.	89.6813	7.30336	80.0699	6.95129	.	3.36	0.273628		4.57333	0.397035		4.59333	0.400226
chrIII	WBGene00000507	cit-1.1	-1	8005761	8009867	3483	13.5512	8.53273	0.629664	0.00912336	11.9231	.	31.7967	2.3464	20.4667	2.39861	.	3.4	0.250899		5.87	0.687939		5.56	0.466323
chrIII	WBGene00000508	cit-1.2	1	8009898	8013706	3208	48.5798	42.6646	0.878237	0.80667	42.2603	.	158.233	3.25718	98.58	2.31058	.	6	0.123508		7.45667	0.174774		8.34	0.197348
chrX	WBGene00000510	cka-2	1	4286800	4291466	4047	3.69619	9.35335	2.53053	1.60925e-15	2.99481	.	6.70667	1.81448	25.4133	2.71703	.	3.18667	0.862148		7.31333	0.781895		2.05333	0.68563
chrV	WBGene00000514	ckb-4	-1	2106397	2109396	1777	6.48171	5.1314	0.791674	0.649161	9.10636	.	36.6224	5.65012	26.2041	5.10661	.	1.47667	0.227821		0.73	0.142261		2.66	0.292104
chrII	WBGene00000516	cki-1	1	7809317	7812052	2135	155.669	150.428	0.96633	0.649087	148.889	.	647.223	4.15768	743.557	4.94294	.	64.9967	0.41753		81.18	0.539661		57.6767	0.38738
chrII	WBGene00000517	cki-2	1	7816512	7820227	2779	18.5696	16.7021	0.899428	0.700911	18.086	.	57.01	3.07007	67.5533	4.04461	.	5.16333	0.278053		6.43667	0.385382		4.82667	0.266873
chrV	WBGene00000521	cky-1	1	12736683	12741194	3911	11.8808	5.47712	0.461004	6.47911e-07	7.41626	.	58.8221	4.95101	31.0433	5.66782	.	2.00667	0.168899		1.88	0.343246		0.96	0.129445
chrX	WBGene00000523	clc-2	1	7430663	7433490	2227	13.515	21.3745	1.58153	1.22802e-07	11.1019	.	55.41	4.09988	115.493	5.40332	.	4.35667	0.322357		10.31	0.482351		4.70667	0.42395
chrII	WBGene00000532	clh-5	-1	9094618	9099080	3597	13.0798	7.50181	0.573542	0.000528036	13.3194	.	77.8267	5.95015	60.8433	8.11049	.	9	0.688085		4.02333	0.536315		7.36667	0.553077
chrV	WBGene00000534	cpi-2	1	6044113	6045654	941	37.7577	46.9655	1.24386	0.000509626	39.5452	.	121.237	3.21091	90.1033	1.9185	.	18.3533	0.486082		17.04	0.36282		15.8	0.399543
chrII	WBGene00000548	clr-1	1	5461041	5473788	12066	34.7159	25.2173	0.726392	0.0287886	31.5064	.	167.093	4.81317	128.317	5.08844	.	7.06333	0.203461		5.07333	0.201185		4.82	0.152985
chrIII	WBGene00000549	cls-2	1	9054886	9058804	3318	22.4055	20.2868	0.905436	0.530019	29.4057	.	115.04	5.13445	98.55	4.85785	.	14.95	0.667246		15.8367	0.78064		25.8667	0.879649
chrIII	WBGene00000550	clu-1	-1	9516565	9521763	4598	35.8995	22.2716	0.620388	0.0411972	32.3701	.	89.6133	2.49623	62.5367	2.80791	.	11.3667	0.316624		7.25333	0.325676		13.52	0.41767
chrV	WBGene00000552	cmd-1	1	1151704	1157761	3968	71.2446	57.0878	0.801294	0.490598	61.4913	.	301.722	4.23502	380.491	6.66502	.	45.17	0.634013		46.3467	0.811848		29.2	0.474864
chrIV	WBGene00000553	cmk-1	1	1824443	1834028	6017	12.8553	12.1923	0.948423	0.276572	13.0907	.	52.42	4.07769	47.67	3.90985	.	3.66781	0.285314		2.88699	0.236788		2.4726	0.188883
chrV	WBGene00000554	cnb-1	1	11375504	11378039	1933	41.5856	38.0887	0.915911	0.50344	32.1381	.	253.293	6.09089	195.213	5.12523	.	11.8074	0.283931		14.5878	0.382996		9.89865	0.308003
chrIII	WBGene00000561	cnd-1	-1	5240554	5242049	893	17.813	10.8505	0.609134	0.523147	11.1389	.	99.8615	5.6061	52.8176	4.86775	.	4.25	0.23859		4.05667	0.373869		2.41333	0.216659
chrIII	WBGene00000564	cnk-1	1	10270939	10278488	6576	11.5519	11.8268	1.02379	0.0881723	13.333	.	102.15	8.84268	85.8667	7.26035	.	9.43667	0.816891		6.03	0.509859		9.43333	0.707516
chrII	WBGene00000565	cnt-1	-1	12072006	12089687	14518	7.58779	5.89268	0.776601	0.268167	7.02376	.	53.1868	7.00953	46.0885	7.82131	.	3.68667	0.485868		3.29667	0.559451		1.08667	0.154713
chrIII	WBGene00000566	cnt-2	1	10651882	10677423	22719	40.272	26.5225	0.658584	0.000305551	34.4695	.	216.576	5.37783	289.709	10.9231	.	18.8433	0.467902		19.3167	0.728313		12.4267	0.360512
chrIII	WBGene00000567	cnx-1	-1	9814296	9817240	2344	58.1329	66.1736	1.13832	0.00864467	69.3349	.	496.027	8.53263	651.963	9.85231	.	37.9633	0.653044		47.18	0.712973		51.23	0.738878
chrI	WBGene00000583	cof-2	1	6250209	6252823	2014	4.96077	3.17701	0.640426	0.157068	5.07299	.	23.8367	4.80503	15.21	4.78752	.	16.38	3.3019		12.99	4.08875		20.2467	3.99107
chrX	WBGene00000591	coh-1	-1	7465903	7475048	8118	23.9741	42.9462	1.79135	2.55711e-19	26.2443	.	129.463	5.40013	195.107	4.54305	.	7.53667	0.314367		10.3067	0.23999		3.02	0.115072
chrIV	WBGene00000603	col-14	1	7753417	7754635	564	6.56649	11.7287	1.78615	0.00236788	4.09929	.	25.1067	3.82345	32.1233	2.73886	.	3.01	0.458388		6.21	0.529469		2.9	0.707439
chrI	WBGene00000639	col-63	-1	8243687	8245615	1251	11.8365	7.80935	0.659767	0.097566	15.0935	.	4.98667	0.421295	7.74667	0.991973	.	80.6167	6.81084		80.5233	10.3111		121.337	8.03899
chrI	WBGene00000641	col-65	-1	11489148	11490585	604	9.92384	4.35017	0.438355	0.185727	5.56457	.	29.8571	3.00863	12.3182	2.83166	.	4.31333	0.434644		3.75333	0.862802		3.13333	0.563086
chrII	WBGene00000650	col-74	1	5830848	5831993	506	26.3113	12.915	0.490855	0.00574452	21.8696	.	218.693	8.31178	156.763	12.1381	.	8.51667	0.323689		8.72333	0.675441		4.83333	0.221007
chrIII	WBGene00000672	col-97	-1	12992301	12994101	1127	6.07232	9.42369	1.55191	0.000875991	7.56344	.	38.94	6.41271	62.4833	6.63045	.	2.42	0.39853		8.47	0.898799		1.44667	0.191271
chrIV	WBGene00000674	col-99	-1	138461	151303	11825	11.4229	7.55311	0.661224	0.12099	10.945	.	24.5933	2.15298	20.7467	2.74677	.	6.23333	0.545687		5.14	0.680515		6.26	0.571949
chrIV	WBGene00000685	col-111	-1	4655784	4657607	1071	11.5439	6.95658	0.602621	0.0342627	12.5584	.	43.1267	3.73589	24.8133	3.56689	.	7.65667	0.663266		7.3	1.04937		11.7	0.931651
chrIV	WBGene00000687	col-113	-1	7150653	7152609	1330	4.07895	3.69887	0.90682	0.820826	3.41955	.	28.9367	7.09415	26.3633	7.1274	.	1.29	0.316258		2.04333	0.552421		0.12	0.0350923
chrIV	WBGene00000695	col-121	-1	9394917	9396379	862	28.5644	30.6473	1.07292	0.0646927	25.935	.	126.04	4.41249	84.5467	2.7587	.	8.06333	0.282286		6.83333	0.222967		4.34	0.167341
chrIV	WBGene00000705	col-131	-1	13065705	13067274	969	3.25645	1.9355	0.594359	0.259526	1.7709	.	8.41333	2.58359	9.71	5.01679	.	1.00333	0.308106		0.833333	0.430552		0.24	0.135524
chrX	WBGene00000738	col-165	1	4353596	4354786	553	37.0515	34.7025	0.936602	0.458327	28.9295	.	140.719	3.79792	144.597	4.16675	.	16.12	0.43507		30.2067	0.870446		8.08667	0.27953
chrI	WBGene00000761	coq-1	-1	5412845	5416328	2878	13.591	9.66557	0.711172	0.120515	12.0528	.	56.36	4.14685	59.76	6.18277	.	71.06	5.22845		35.9933	3.72387		57.9667	4.80939
chrIII	WBGene00000765	coq-5	-1	7857242	7858515	673	12.0156	3.3945	0.282508	7.5157e-07	10.2764	.	45.3133	3.77121	16.4733	4.85295	.	8.6	0.715736		6.62667	1.95218		8.33333	0.810922
chrIII	WBGene00000768	cor-1	1	10248958	10254619	5045	8.17473	7.06779	0.86459	0.972563	6.65292	.	46.38	5.67358	69.2767	9.80174	.	5.79667	0.709096		6.26667	0.886652		8.94	1.34377
chrII	WBGene00000773	cpf-1	-1	8600300	8602420	1520	14.248	7.90691	0.554948	0.00381309	12.8638	.	64.8467	4.55127	34.0033	4.30046	.	4.38	0.307411		3.23	0.408504		2.77333	0.215592
chrIII	WBGene00000774	cpf-2	-1	13266839	13268867	1334	14.4393	14.045	0.972692	0.331264	16.9168	.	112.94	7.82172	87.3	6.21575	.	2.1	0.145437		2.95	0.210039		1.32667	0.0784231
chrIV	WBGene00000775	cpin-1	1	9450697	9453355	2058	5.05564	3.47012	0.686386	0.228984	3.90768	.	14.9567	2.95841	18.3067	5.27552	.	1.97667	0.390983		1.49	0.42938		1.80667	0.462338
chrV	WBGene00000776	cpl-1	-1	16592550	16595413	2085	57.1002	53.7626	0.941548	0.68279	77.517	.	169.19	2.96303	160.143	2.97871	.	15.7333	0.275539		20.42	0.379818		19.0933	0.246311
chrII	WBGene00000778	cpn-2	1	337369	339248	1255	24.8618	21.8155	0.877474	0.935135	26.894	.	164.393	6.6123	131.643	6.03438	.	12.71	0.511227		7.77	0.356168		7.84667	0.291762
chrI	WBGene00000780	cpn-4	-1	10924231	10925904	1066	2.86632	4.46201	1.5567	0.0279893	3.13884	.	11.9966	4.18538	13.5436	3.03532	.	3.33667	1.16409		5.07	1.13626		1.56	0.496999
chrX	WBGene00000786	cpr-6	1	6607169	6609009	1230	9.31138	35.963	3.86226	1.54552e-32	11.7081	.	41.6867	4.47696	132.003	3.67053	.	10.6333	1.14197		25.44	0.707394		7.60667	0.649691
chrI	WBGene00000788	cpz-1	-1	2686642	2689444	1670	14.3332	16.4401	1.14699	0.0191031	17.2305	.	70.0367	4.88631	99.7333	6.06646	.	7.31333	0.510236		10.2867	0.625705		8.93333	0.518459
chrIII	WBGene00000793	crh-1	1	11657371	11693737	29499	12.974	11.1133	0.856576	0.969306	9.18421	.	103.447	7.97339	151.817	13.6609	.	1	0.0770769		1.32667	0.119377		1.08667	0.118319
chrX	WBGene00000797	crn-4	-1	2255840	2258564	2117	3.09778	5.58715	1.8036	0.000161356	3.188	.	12.91	4.1675	23.9333	4.28364	.	8.63667	2.78802		5.63	1.00767		9.50667	2.98201
chrV	WBGene00000802	crt-1	-1	6098976	6100711	1123	165.601	303.385	1.83203	8.88171e-22	280.866	.	894.967	5.40437	1974.71	6.50893	.	140.717	0.849735		317.78	1.04745		189.873	0.676029
chrX	WBGene00000803	csb-1	-1	15861224	15866206	4177	7.13371	9.38951	1.31622	0.000413943	6.87216	.	39.2267	5.49878	72.27	7.69688	.	1.98	0.277555		2.32333	0.247439		0.24	0.0349235
chrI	WBGene00000812	csk-1	1	70173	81071	9761	26.7187	23.5397	0.881019	0.771117	21.5815	.	172.377	6.45153	324.943	13.804	.	13.5033	0.505388		17.2033	0.730822		12.7933	0.592792
chrIII	WBGene00000833	cts-1	-1	10214723	10216734	1411	48.7775	41	0.840552	0.847351	70.6279	.	220.507	4.52067	205.307	5.00748	.	39.0067	0.799686		25.4367	0.620407		43.4533	0.615243
chrIII	WBGene00000835	cuc-1	-1	7860399	7861624	625	12.2008	8.496	0.696348	0.251456	9.1472	.	97.1	7.95849	58.4967	6.8852	.	6.65	0.545046		4.38333	0.515929		7.86	0.859279
chrIII	WBGene00000836	cul-1	1	10470360	10475121	4147	13.9213	9.30408	0.668335	0.18667	11.8117	.	122.403	8.79254	89.7633	9.64774	.	4.57333	0.328514		4.58	0.492257		4.22667	0.357838
chrIII	WBGene00000837	cul-2	1	13686534	13692487	5348	15.3535	12.3239	0.802674	0.462448	17.9266	.	93.6833	6.10176	80.6733	6.54611	.	1.18667	0.0772897		1.44667	0.117387		3.26667	0.182224
chrV	WBGene00000838	cul-3	1	177121	184873	5513	14.1735	9.75703	0.688399	0.0237738	15.8043	.	144.303	10.1812	96.624	9.90302	.	13.5567	0.95648		8.22333	0.842811		12.4133	0.785441
chrII	WBGene00000839	cul-4	1	7301900	7305717	3217	11.0699	6.6161	0.597664	0.00503459	9.22894	.	61.2267	5.53089	39.7867	6.01361	.	7.54667	0.681726		3.26	0.492737		8.68667	0.941242
chrV	WBGene00000840	cul-5	1	10178461	10183129	3565	23.9798	19.9748	0.832982	0.734015	23.3074	.	157.359	6.56216	137.539	6.88564	.	8.02667	0.334726		11.28	0.564713		13.2867	0.570061
chrI	WBGene00000843	cup-2	-1	10398975	10400742	1167	35.4113	23.1752	0.654459	0.014803	29.6881	.	176.877	4.99492	99.1567	4.27856	.	8.58333	0.24239		8.45333	0.364757		6.04	0.203449
chrII	WBGene00000857	cwn-1	-1	130983	133969	2271	17.1885	15.9601	0.928538	0.557536	14.8336	.	61.5067	3.57837	44.1942	2.76904	.	6.85333	0.398717		8.1	0.507514		3.73333	0.251682
chrIV	WBGene00000865	cyb-1	1	10734757	10737161	1731	18.9356	17.0685	0.901396	0.684202	22.7181	.	95.1667	5.02581	63.62	3.72734	.	3.54667	0.187302		5.58	0.326919		3.86667	0.170202
chrV	WBGene00000868	cyb-3	1	15395550	15397331	1181	26.3514	20.1998	0.766556	0.421795	38.8628	.	73.5367	2.79062	57.3867	2.84095	.	13.8467	0.525462		13.96	0.691095		16.2067	0.417022
chrI	WBGene00000869	cyc-1	-1	8022680	8024688	1408	19.4009	9.55682	0.492596	5.57249e-05	19.0398	.	133.277	6.8696	53.65	5.61379	.	21.2967	1.09771		13.1433	1.37528		23.5267	1.23566
chrIII	WBGene00000875	cyk-4	-1	13768440	13771210	2166	26.1918	22.8569	0.872672	0.866605	28.5189	.	129.47	4.94314	90.0833	3.94119	.	13.27	0.506647		14.0367	0.614111		10.02	0.351346
chrV	WBGene00000876	cyl-1	-1	11990991	11993810	2219	37.7204	32.6913	0.866675	0.896486	32.0737	.	288.137	7.63876	175.49	5.36809	.	7.52667	0.199539		9.51333	0.291005		7.14	0.222612
chrV	WBGene00000879	cyn-3	1	15189782	15190910	391	25.8146	37.8798	1.46738	0.000466913	40.2379	.	118.733	4.59947	177.663	4.69019	.	8.74	0.338568		12.1833	0.321631		9.53333	0.236925
chrII	WBGene00000880	cyn-4	-1	10870718	10872617	1299	14.5212	10.0466	0.691857	0.157758	14.0978	.	66.7	4.59329	106.42	10.5927	.	3.38333	0.232993		3.43667	0.342073		7.73333	0.54855
chrIII	WBGene00000882	cyn-6	1	772914	774156	634	34.6009	31.2192	0.902266	0.868737	34.9353	.	121.91	3.52331	102.513	3.28366	.	30.2533	0.87435		24.5	0.784772		19.8167	0.567239
chrV	WBGene00000883	cyn-7	-1	15186565	15187755	453	49.9481	75.6192	1.51395	0.00605915	69.0143	.	261.203	5.22949	277.037	3.66358	.	16.79	0.336149		18.33	0.242399		12.8133	0.185662
chrX	WBGene00000884	cyn-8	1	8911290	8914199	2309	15.9877	19.6081	1.22645	0.00149149	14.6223	.	54.8	3.42764	74.33	3.79079	.	11.0867	0.693452		20.4667	1.04379		10.3467	0.707593
chrII	WBGene00000887	cyn-11	-1	8715143	8716463	713	11.3927	5.36255	0.4707	0.00304952	12.899	.	52.95	4.64771	20.8467	3.88745	.	9.15	0.803145		4.99667	0.93177		6.16	0.477556
chrV	WBGene00000893	cyn-17	1	5799878	5805642	5107	13.9352	10.8031	0.77524	0.321936	9.79362	.	32.0141	2.29736	38.6207	3.57496	.	6.29667	0.451854		10.3533	0.958366		4.34667	0.443827
chrII	WBGene00000894	dab-1	1	8222926	8229100	5561	49.3207	44.1264	0.894683	0.642597	42.3592	.	162.753	3.29988	140.71	3.18879	.	19.2	0.389289		23.1367	0.524327		19.7333	0.465857
chrI	WBGene00000896	dad-1	-1	6553480	6554590	510	23.951	21.5627	0.900287	0.852554	19.5353	.	188.18	7.85688	126.643	5.87325	.	10.4833	0.4377		12.7533	0.591452		13.5267	0.692422
chrX	WBGene00000899	daf-3	-1	817926	829310	10629	12.5801	19.4899	1.54926	1.16412e-11	14.4166	.	70.8333	5.63058	120.87	6.20168	.	3.12162	0.248139		6.44932	0.330906		4.89865	0.339792
chrIII	WBGene00000900	daf-4	1	5621477	5632277	10039	17.7756	14.9605	0.84163	0.786931	17.1599	.	188.05	10.5791	194.393	12.9938	.	18.9067	1.06363		12.1533	0.812364		11.4533	0.667448
chrII	WBGene00000901	daf-5	-1	14033159	14042873	8444	39.3933	31.2751	0.793919	0.288816	43.3251	.	154.158	3.9133	138.493	4.42823	.	26.0367	0.660942		17.0467	0.545055		18.9067	0.43639
chrX	WBGene00000902	daf-6	1	14888334	14894257	4980	8.73213	17.5327	2.00784	9.06764e-17	8.73855	.	25.1733	2.88284	54.23	3.09307	.	8.15	0.933335		7.43333	0.423969		5.78	0.661437
chrI	WBGene00000904	daf-8	-1	8584536	8590676	5534	11.5122	6.99548	0.607658	0.00170204	11.0573	.	20.4963	1.7804	20.9967	3.00146	.	4.96333	0.431137		4.3	0.614682		6.28667	0.568554
chrIV	WBGene00000911	daf-15	1	9386264	9394905	7851	13.2418	11.2644	0.850675	0.892177	15.6056	.	60.1933	4.54572	59.3833	5.27176	.	5.35	0.404025		2.95	0.261886		5.44	0.348593
chrIV	WBGene00000913	daf-18	-1	419987	425719	4877	11.3599	7.81843	0.688251	0.0350611	11.7685	.	82.1967	7.23572	52.0767	6.66075	.	4.14333	0.364735		2.22	0.283944		1.81333	0.154084
chrII	WBGene00000914	daf-19	-1	10157478	10169465	11339	34.8162	37.8912	1.08832	0.00325219	35.1859	.	111.393	3.19947	80.9	2.13506	.	22.02	0.632464		26.2	0.691453		16.6733	0.473864
chrI	WBGene00000931	dao-5	-1	10187505	10190993	1659	21.3975	16.0594	0.750525	0.254258	20.4804	.	148.013	6.91731	94.4767	5.88296	.	22.4967	1.05137		11.95	0.744114		22.54	1.10056
chrI	WBGene00000938	dcp-66	-1	7537724	7543501	5130	48.1032	42.522	0.883975	0.763823	51.3306	.	63.6333	1.32285	66.44	1.56248	.	48.58	1.00991		68.35	1.6074		62.6067	1.21968
chrIII	WBGene00000939	dcr-1	-1	8071850	8080289	7617	6.80517	4.26145	0.626208	0.0114398	6.15584	.	55.3086	8.12744	29.9691	7.03261	.	2.48	0.364429		1.59333	0.373894		1.81333	0.294571
chrIV	WBGene00000942	deb-1	-1	7085207	7095431	9613	29.8092	25.5932	0.858565	0.964528	22.746	.	112.507	3.77422	128.85	5.03455	.	10.4633	0.35101		8.87333	0.346707		12.5533	0.551893
chrX	WBGene00000959	dgk-2	-1	4494888	4504470	8970	18.5658	30.5813	1.64718	5.39269e-15	20.1774	.	62.23	3.35186	185.1	6.05271	.	7.10667	0.382782		8.82667	0.288629		6.40667	0.317517
chrII	WBGene00000969	dhs-5	1	5453868	5455959	1489	19.9604	16.0017	0.801672	0.612409	16.407	.	49	2.45486	45.6533	2.85303	.	10.5033	0.526209		9.69	0.605561		12.3133	0.750493
chrII	WBGene00000970	dhs-6	-1	5617107	5619409	1548	15.3837	12.0859	0.78563	0.468279	18.2106	.	62.1655	4.04099	66.0828	5.46775	.	57.3467	3.72775		28.9733	2.39728		49.1667	2.69989
chrII	WBGene00000972	dhs-8	1	14496931	14499611	2025	17.7442	31.5543	1.77829	2.85133e-12	17.281	.	61.1818	3.44799	105.671	3.34885	.	200.423	11.2951		134.837	4.27316		436.94	25.2844
chrIII	WBGene00000973	dhs-9	-1	5364473	5368339	1634	10.7824	15.7974	1.46511	2.29782e-06	14.6799	.	45.4367	4.21395	44.8867	2.84139	.	8.39	0.778117		8.95333	0.566759		15.5533	1.0595
chrV	WBGene00000979	dhs-16	1	5981613	5985494	3274	13.6301	8.28131	0.607574	0.00530876	11.7874	.	92.5833	6.79256	53.93	6.51226	.	2.88667	0.211786		2.46333	0.297457		3.01333	0.25564
chrV	WBGene00000982	dhs-19	-1	11489031	11490429	797	7.61481	10.313	1.35434	0.0190677	7.88582	.	23.25	3.05326	27.0724	2.62506	.	1.7	0.223249		2.73667	0.26536		2.54	0.322097
chrV	WBGene00000984	dhs-21	-1	12731755	12733586	1231	7.3156	6.90455	0.943812	0.695486	6.59789	.	34.8267	4.7606	26.69	3.86557	.	2.92333	0.399603		5.28667	0.765679		4.34	0.657786
chrX	WBGene00000988	dhs-25	1	1486531	1489324	2189	13.2593	26.7736	2.01924	1.12909e-14	15.3851	.	39.8385	3.00458	92.3077	3.44771	.	13.2767	1.00131		24.6033	0.918939		19.5733	1.27223
chrX	WBGene00000990	dhs-27	-1	3412870	3414819	1347	26.9362	43.1437	1.6017	4.70502e-06	26.5895	.	84.5333	3.13829	178.897	4.14655	.	9.03667	0.335485		15.49	0.359033		9.05333	0.340486
chrX	WBGene00000991	dhs-28	1	6818301	6820034	1133	13.5353	50.4554	3.72769	1.05406e-37	16.8967	.	50.9367	3.76324	171.84	3.40578	.	5.43333	0.401419		13.3467	0.264524		5.07333	0.300255
chrIV	WBGene00000994	dic-1	1	8691726	8696443	4102	7.82594	5.21075	0.665831	0.0581416	7.90346	.	16.9433	2.16502	16.96	3.25481	.	8.64667	1.10487		5.83667	1.12012		8.22	1.04005
chrII	WBGene00000995	die-1	-1	10061486	10074850	12753	33.0699	14.5283	0.43932	1.04061e-16	24.1162	.	228.137	6.89863	105.097	7.23394	.	11.6867	0.353393		5.92667	0.40794		12.6533	0.524681
chrIV	WBGene00000996	dif-1	-1	7551539	7553319	1164	43.0799	29.6082	0.687287	0.0370345	43.4712	.	103.463	2.40166	114.403	3.8639	.	80.8767	1.87736		88.2267	2.9798		70.2533	1.61609
chrIII	WBGene00000998	dig-1	1	6742784	6794709	34719	7.45646	8.22947	1.10367	0.00158403	7.45816	.	50.0033	6.70604	31.8333	3.86821	.	2.40333	0.322315		1.46	0.177411		1.44667	0.193971
chrIV	WBGene00001001	dis-3	1	10097114	10106535	8497	12.5842	9.60857	0.763542	0.198892	11.5677	.	62.6573	4.97905	33.5488	3.49155	.	3.02333	0.240248		2.14667	0.223412		2.66	0.22995
chrIII	WBGene00001002	div-1	-1	10244958	10248811	3177	7.15282	4.50252	0.629475	0.0378642	6.83286	.	40.0048	5.59287	25.7571	5.72061	.	1.38667	0.193863		1.93333	0.429389		1.68667	0.246846
chrIII	WBGene00001005	dlc-1	-1	6462853	6464251	797	59.9141	62.2704	1.03933	0.0532734	44.4918	.	275.283	4.59464	324.463	5.21056	.	37.52	0.62623		45.6667	0.733361		24.7333	0.555907
chrX	WBGene00001006	dlg-1	1	5475472	5484904	8803	82.66	103.034	1.24648	0.00415246	80.2271	.	342.276	4.14077	432.746	4.20004	.	30.92	0.374062		62.8033	0.60954		36.2133	0.451385
chrIV	WBGene00001007	dli-1	-1	13096959	13098778	1219	23.71	18.2797	0.770971	0.410123	25.7174	.	81.3233	3.42992	90.83	4.96889	.	8.34014	0.351756		7.41156	0.405452		11.2313	0.43672
chrI	WBGene00001008	dlk-1	-1	12565789	12575805	9089	20.4078	18.0036	0.882194	0.905135	19.5594	.	135.247	6.6272	148.457	8.24593	.	11.5767	0.567267		8.15333	0.452872		5.55333	0.283922
chrIV	WBGene00001017	dnc-1	-1	10926253	10933226	6362	14.6336	14.3591	0.98124	0.181431	17.0687	.	34.52	2.35895	39.7473	2.76809	.	7.82333	0.534614		17.4033	1.21201		13.7667	0.806545
chrIII	WBGene00001018	dnc-2	-1	5924346	5925851	905	7.5116	6.76961	0.901221	0.752684	9.09724	.	62.1167	8.26943	33.7467	4.98502	.	4.58	0.609723		2.88333	0.425923		1.80667	0.198595
chrIV	WBGene00001019	dnj-1	1	11298702	11304765	3688	25.6373	18.5005	0.721625	0.0494637	20.2074	.	194.95	7.60414	144.633	7.81779	.	4.16667	0.162523		5.94	0.321072		8.46	0.418658
chrII	WBGene00001023	dnj-5	-1	6853426	6858930	4904	45.2651	33.2355	0.734242	0.0522121	42.5052	.	85.17	1.88158	111.914	3.36731	.	22.6133	0.499576		21.6833	0.652414		18.3667	0.432104
chrX	WBGene00001025	dnj-7	1	7194243	7198236	3151	13.5944	22.5493	1.65872	2.07345e-10	13.4262	.	48.45	3.56396	147.757	6.55259	.	7.66333	0.563712		12.1533	0.538966		13.6533	1.01692
chrII	WBGene00001027	dnj-9	1	4851880	4857706	5101	10.2777	8.28014	0.805642	0.618548	9.15566	.	116.133	11.2996	121.413	14.6632	.	9.93667	0.966819		5.23667	0.632437		7	0.764555
chrI	WBGene00001030	dnj-12	1	14756836	14758780	1344	72.6536	82.7359	1.13877	0.027393	83.9141	.	472.64	6.50539	670.08	8.09903	.	15.18	0.208937		18.8933	0.228357		14.14	0.168506
chrII	WBGene00001031	dnj-13	1	11545497	11547302	1205	47.2925	66.4801	1.40572	2.35395e-05	79.6598	.	297.53	6.29127	348.527	5.24257	.	14.9167	0.315413		25.6033	0.385128		18.1267	0.227551
chrX	WBGene00001032	dnj-14	-1	4709838	4711959	1521	16.2156	30.5487	1.8839	5.15856e-12	15.1519	.	44.0233	2.71487	99.62	3.26103	.	12.76	0.786894		30.7533	1.0067		11.94	0.788021
chrIV	WBGene00001033	dnj-15	1	4176540	4178354	1190	24.3878	27.2118	1.11579	0.0290154	22.5412	.	109.544	4.49174	138.936	5.10574	.	79.4645	3.25837		107.504	3.95063		65.4184	2.90218
chrV	WBGene00001037	dnj-19	-1	5503017	5505167	1550	63.7374	67.3171	1.05616	0.0182976	68.5939	.	198.651	3.11671	205.276	3.04939	.	24.6567	0.386848		24.8867	0.369693		13.3933	0.195256
chrII	WBGene00001038	dnj-20	-1	9618263	9624214	5346	29.1909	22.0686	0.756012	0.154314	26.1869	.	217.65	7.45609	204.363	9.26035	.	3.77667	0.129378		3.26667	0.148023		0.96	0.0366596
chrV	WBGene00001040	dnj-22	-1	8461009	8462182	573	6.18499	4.28098	0.692156	0.395812	8.2007	.	80.57	13.0267	84.55	19.7502	.	1.31333	0.212342		3.33667	0.779417		0.24	0.0292658
chrII	WBGene00001041	dnj-23	-1	9107319	9108567	648	11.4568	5.68904	0.496565	0.0133026	11.6914	.	73.8633	6.44712	33.5767	5.90199	.	5.42333	0.473373		5.00667	0.880054		3.25333	0.278268
chrIII	WBGene00001042	dnj-24	-1	5416096	5426222	9517	24.1637	18.0294	0.746136	0.0956143	25.5594	.	99.21	4.10575	105.83	5.86987	.	10.7	0.442814		9.33	0.517489		15.4467	0.604345
chrV	WBGene00001043	dnj-25	-1	20729917	20744387	12597	14.8704	12.9804	0.872903	0.874662	13.4489	.	127.56	8.57813	77.3	5.95514	.	2.78333	0.187173		1.59333	0.122749		2.17333	0.1616
chrI	WBGene00001056	dpf-3	1	6838294	6843342	4418	9.26075	5.73653	0.619446	0.007454	9.06745	.	176.253	19.0323	106.403	18.5484	.	230.943	24.9379		144.547	25.1976		140.437	15.488
chrII	WBGene00001061	dpl-1	1	9169614	9172502	2287	12.5538	7.61325	0.606451	0.00981742	11.4823	.	51.0033	4.06279	41.6567	5.4716	.	3.89333	0.310132		4.33667	0.569621		3.37333	0.293786
chrIII	WBGene00001063	dpy-1	-1	2034967	2049116	12051	10.499	8.96204	0.853608	0.900499	7.93453	.	22.86	2.17735	19.94	2.22494	.	4.72667	0.450201		1.80667	0.201591		4.10667	0.517569
chrII	WBGene00001064	dpy-2	1	6714107	6715961	1254	19.6073	20.4155	1.04122	0.432289	22.3979	.	45.2467	2.30765	52.0867	2.55133	.	4.16333	0.212336		4.33667	0.212421		0.96	0.0428611
chrX	WBGene00001065	dpy-3	-1	2144596	2145731	468	15.3034	35.172	2.29831	0.000224236	19.2585	.	233.027	15.2271	407.353	11.5817	.	14.5267	0.949243		33.8633	0.962792		16.32	0.847416
chrI	WBGene00001075	dpy-14	1	6843597	6845135	897	156.537	91.0992	0.581967	0.376196	109.497	.	432.71	2.76427	284.56	3.12363	.	46.5467	0.297353		52.78	0.579368		37.39	0.341472
chrIII	WBGene00001076	dpy-17	1	5107146	5108550	761	161.327	148.104	0.918042	0.727182	235.436	.	524.07	3.2485	435.301	2.93915	.	137.797	0.854148		135.73	0.916448		108.707	0.461726
chrIII	WBGene00001077	dpy-18	-1	11372781	11380590	5641	28.7555	27.2302	0.946955	0.259581	33.5499	.	88.0533	3.06213	109.766	4.03102	.	11.06	0.384622		12.8433	0.471658		7.49333	0.223349
chrIII	WBGene00001078	dpy-19	-1	8659793	8668764	8361	12.513	9.34667	0.746954	0.125838	12.4694	.	38.8333	3.10343	28.68	3.06847	.	8.44966	0.675269		5.63087	0.602447		7.54362	0.604969
chrV	WBGene00001080	dpy-21	-1	17936734	17951240	12111	42.8524	53.0119	1.23708	1.4567e-06	52.0911	.	282.71	6.59729	368.1	6.94373	.	21.66	0.505455		29.03	0.547613		13.7533	0.264025
chrX	WBGene00001081	dpy-22	-1	9810173	9822621	11848	16.2664	27.6654	1.70077	1.19735e-16	16.9608	.	102.867	6.32388	174.84	6.31981	.	16.04	0.986083		28.8033	1.04113		12.6733	0.747215
chrX	WBGene00001082	dpy-23	1	4389185	4393770	3960	23.7131	58.8157	2.4803	2.26326e-34	22.6854	.	99.1133	4.17968	265.927	4.52137	.	12.2167	0.515186		28.49	0.484395		17.4	0.767015
chrIV	WBGene00001085	dpy-26	-1	12445959	12451349	4731	14.9268	8.72479	0.584507	0.00024506	14.4473	.	98.8548	6.62266	76.2283	8.73697	.	5.4	0.361766		3.23	0.370209		7.12667	0.493288
chrIII	WBGene00001086	dpy-27	-1	3813535	3820252	6104	48.7676	55.5463	1.139	0.000596798	47.7276	.	336.503	6.90014	424.56	7.64336	.	37.2833	0.76451		45.59	0.820757		27.5267	0.576746
chrIII	WBGene00001087	dpy-28	1	10763029	10777243	12600	18.2521	14.3221	0.784678	0.467501	14.1965	.	81.39	4.4592	105.42	7.36067	.	56.0633	3.0716		112.737	7.87154		108.107	7.61504
chrV	WBGene00001089	dre-1	-1	6533598	6538457	4257	38.4308	27.0429	0.703677	0.0177948	48.5595	.	203.467	5.29436	134.313	4.96668	.	30.01	0.780884		26.1433	0.966737		33	0.679578
chrIV	WBGene00001093	drp-1	1	5538035	5541356	2718	14.5804	9.60118	0.658499	0.039112	15.0224	.	94.3074	6.4681	55.4655	5.77695	.	9.65333	0.662076		7.57	0.788445		10.7533	0.715818
chrIII	WBGene00001094	dars-1	-1	9489078	9491217	1539	11.886	7.70533	0.648271	0.121498	12.499	.	45.7467	3.8488	37.2567	4.83518	.	4.48	0.376915		3.81333	0.494896		1.20667	0.0965409
chrIV	WBGene00001099	dsc-4	-1	315053	320562	4826	4.57605	5.52828	1.20809	0.0188099	3.55222	.	17.84	3.89856	33.5	6.05975	.	1.79333	0.391896		2.32333	0.420263		0.24	0.0675634
chrII	WBGene00001101	dsh-1	-1	5214430	5227867	12805	33.4627	23.506	0.702454	0.0090164	30.438	.	182.643	5.45812	127.976	5.44438	.	21.3533	0.638123		20.9633	0.891829		18.1	0.594651
chrII	WBGene00001102	dsh-2	-1	5078202	5081309	2504	19.3876	15.4593	0.79738	0.506152	19.0196	.	88.2033	4.54948	63.7833	4.1259	.	44.5	2.29528		43.5333	2.816		33.3067	1.75118
chrIV	WBGene00001104	dsl-2	-1	1202647	1206399	2779	5.30946	4.67344	0.88021	0.876518	5.58978	.	15.72	2.96075	11.2663	2.41071	.	4.34	0.817408		2.876	0.615392		1.872	0.334897
chrIV	WBGene00001105	dsl-3	1	1610409	1612914	969	14.3741	9.18111	0.638726	0.0456656	10.9092	.	62.1154	4.32134	40.2812	4.3874	.	9.79	0.681086		8.14	0.886603		6.64	0.608661
chrI	WBGene00001115	dyb-1	1	1481833	1491282	7891	22.1867	23.5817	1.06288	0.00983123	18.4373	.	58.1304	2.62006	65.2535	2.76713	.	12.94	0.583233		10.89	0.461799		7.60667	0.41257
chrX	WBGene00001116	dyc-1	1	14039966	14063806	21479	5.62738	7.80448	1.38688	2.82738e-07	3.68397	.	70.0814	12.4536	271.494	34.787	.	2.37333	0.421747		2.11667	0.271212		0.96	0.260588
chrI	WBGene00001117	dyf-1	-1	4989556	4994670	4480	7.14743	8.3798	1.17242	0.0129734	7.07031	.	10.8067	1.51196	14.1733	1.69137	.	2.56667	0.359103		2.31667	0.276458		2.16667	0.306446
chrIV	WBGene00001119	dyf-3	-1	3396578	3399154	1973	4.13254	4.69159	1.13528	0.133656	5.13634	.	9.44667	2.28592	9.42333	2.00856	.	2.78333	0.673516		1.74	0.370877		2.66	0.517878
chrI	WBGene00001121	dyf-5	1	9358916	9364172	4654	10.6051	9.62419	0.907509	0.650155	8.42179	.	14.9767	1.41222	18	1.87029	.	4.32534	0.407856		7.84589	0.815226		5.96575	0.708371
chrX	WBGene00001127	dyf-11	1	763631	766732	2500	3.685	8.0884	2.19495	9.74822e-09	4.0504	.	13.0367	3.53777	24.1467	2.98535	.	2.38333	0.646766		5.13667	0.635066		2.17333	0.536573
chrX	WBGene00001130	dyn-1	1	15566804	15573625	6206	17.7976	30.5656	1.7174	2.30447e-15	18.4942	.	72.6667	4.08294	127.643	4.17605	.	8.86333	0.498007		16.08	0.526082		7.72667	0.417789
chrIV	WBGene00001132	alp-1	1	8851056	8862474	10799	14.8284	14.6501	0.987979	0.163162	13.4101	.	36.1233	2.4361	30.5833	2.08758	.	2.69333	0.181634		2.81	0.191807		0.84	0.0626392
chrV	WBGene00001137	eat-6	-1	13126392	13130589	3591	62.9695	56.2044	0.892565	0.679527	48.7549	.	204.342	3.2451	165.895	2.95163	.	28.88	0.458635		32.9133	0.585601		30.1767	0.618946
chrI	WBGene00001145	eat-16	1	9722574	9725602	2428	38.0807	26.8289	0.704526	0.0387253	33.014	.	70.1533	1.84223	54.8067	2.04282	.	20.4233	0.536317		17.27	0.64371		10.1267	0.306739
chrX	WBGene00001148	eat-20	1	15511963	15523932	11056	12.6448	17.3958	1.37572	6.89742e-08	13.0793	.	47.2649	3.73789	98.0519	5.63654	.	6.42	0.507718		6.28333	0.361199		8.92667	0.682502
chrX	WBGene00001149	bcat-1	1	12876919	12880255	2736	2.27979	6.32365	2.77379	2.7962e-09	2.56031	.	5.17667	2.27068	21.9167	3.46583	.	1.59333	0.698895		12.9733	2.05156		1.80667	0.705645
chrII	WBGene00001153	ech-4	1	10820179	10822635	1849	10.3975	7.99297	0.768739	0.462392	12.9735	.	30.9433	2.97603	34.9733	4.37551	.	2.27181	0.218496		1.95302	0.244342		12.0604	0.929618
chrIV	WBGene00001154	ech-5	1	796916	799320	1779	6.79174	3.23075	0.475688	0.00352295	4.27768	.	18.7083	2.75457	22.3796	6.92707	.	1.6	0.23558		1.18	0.365241		0	0
chrIII	WBGene00001155	ech-6	-1	9751355	9752883	928	23.4159	10.9267	0.466636	2.14709e-05	28.7802	.	196.56	8.39428	77.132	7.05902	.	30.18	1.28887		18.22	1.66747		23.2467	0.807732
chrIII	WBGene00001160	efk-1	-1	6164867	6170160	4670	27.362	39.5802	1.44654	1.07215e-09	48.5086	.	118.747	4.33984	293.78	7.4224	.	12.0233	0.439417		14.4133	0.364155		18.2533	0.376291
chrV	WBGene00001161	efl-1	-1	16958566	16965782	5024	8.65774	6.7502	0.779672	0.592013	7.46994	.	78.392	9.05455	66.164	9.80179	.	1.39667	0.16132		2.67	0.395544		1.08667	0.145472
chrIV	WBGene00001163	efn-2	1	10575460	10578266	2206	34.7446	21.3275	0.613838	0.00553668	28.8051	.	97.7763	2.81415	66.9967	3.14133	.	29.6633	0.853755		18.28	0.857109		19.76	0.68599
chrIII	WBGene00001166	eftu-2	1	6009265	6012790	2925	14.0711	11.6979	0.831345	0.943518	12.24	.	29.2638	2.07971	28.2533	2.41524	.	7.06667	0.502211		6.64	0.567621		7	0.571895
chrI	WBGene00001167	eef-2	1	9163569	9166945	2776	50.3246	36.6707	0.728685	0.0698571	55.569	.	438.863	8.72066	170.44	4.64785	.	35.12	0.69787		33.5467	0.914807		28.9733	0.521394
chrIII	WBGene00001168	eef-1A.1	-1	6969971	6971997	553	56.3219	34.5678	0.613755	0.000652253	65.5669	.	198.977	3.53285	103.4	2.99122	.	12.3	0.218388		9.93333	0.287358		10.86	0.165632
chrX	WBGene00001169	eef-1A.2	1	7823396	7825718	776	102.862	143.155	1.39171	1.7437e-09	116.095	.	238.393	2.3176	388.193	2.71171	.	69.21	0.672842		111.1	0.776084		71.79	0.618374
chrIII	WBGene00001174	egl-5	1	7812392	7816386	3358	10.9933	6.97722	0.634679	0.0632207	7.42704	.	26.25	2.38782	18.81	2.69592	.	5.34	0.48575		6.92	0.991799		6.02667	0.811449
chrV	WBGene00001178	egl-9	1	10466914	10476929	9414	36.2777	47.9387	1.32144	5.57873e-08	55.9751	.	133.39	3.67692	168.45	3.51386	.	21.7733	0.600186		23.63	0.492921		32.76	0.58526
chrV	WBGene00001179	egl-10	-1	12454502	12463145	8009	20.5923	19.4882	0.946384	0.269873	18.2124	.	52.51	2.54999	78.6733	4.03697	.	26.1733	1.27103		14.6933	0.75396		25.7267	1.41259
chrIV	WBGene00001187	egl-19	1	7402431	7418722	15661	17.0881	16.243	0.950541	0.233969	12.3398	.	109.333	6.39821	75.9132	4.67361	.	15.9033	0.930666		14.2333	0.876277		15.7867	1.27933
chrIV	WBGene00001189	egl-21	-1	10478422	10481754	2732	10.5679	9.96907	0.943335	0.453988	10.369	.	30.2987	2.86705	35.849	3.59602	.	14.48	1.37019		28.51	2.85985	Y	14.4867	1.39712
chrII	WBGene00001193	egl-26	1	66663	71279	3791	41.4081	34.1	0.82351	0.597649	36.8333	.	173.081	4.17989	211.363	6.19834	.	35.7067	0.862312		35.6333	1.04497		22.8267	0.619729
chrII	WBGene00001194	egl-27	1	6832986	6847865	14253	46.6268	26.5263	0.568906	0.0192658	43.0051	.	547.037	11.7322	461.743	17.407	.	25.31	0.542821		14.4133	0.543361		15.42	0.358562
chrI	WBGene00001196	egl-30	1	1835745	1841193	4446	100.893	111.635	1.10646	0.00113474	116.748	.	142.96	1.41694	215.96	1.93452	.	153.647	1.52286		171.573	1.53692		176.263	1.50978
chrII	WBGene00001207	egl-43	1	9954499	9962186	7070	13.2601	14.0081	1.05641	0.0791511	12.9631	.	92.057	6.9424	97.2567	6.94287	.	5.88667	0.443938		4.05667	0.289594		3.48667	0.268969
chrII	WBGene00001208	egl-44	1	5933371	5940777	6802	30.4144	25.8469	0.849825	0.868512	28.7489	.	211.807	6.96403	292.447	11.3146	.	20.7333	0.681695		16.7867	0.649466		21.72	0.755507
chrIII	WBGene00001209	egl-45	-1	7824311	7829015	4103	18.9308	12.1043	0.639399	0.00426701	20.1538	.	52.7267	2.78523	42.77	3.53345	.	8.56667	0.452526		7.14667	0.590423		8.57333	0.425396
chrV	WBGene00001210	egl-46	-1	6679312	6681661	1749	85.6186	68.584	0.801041	0.671112	77.6312	.	187.113	2.18543	160.867	2.34554	.	60.73	0.709308		67.78	0.988276		37.56	0.483826
chrI	WBGene00001215	ego-2	-1	11400603	11416704	13023	15.1161	17.9645	1.18844	6.79148e-05	15.0094	.	132.824	8.78693	87.2787	4.85839	.	7.53333	0.498366		9.62	0.5355		8.22	0.547655
chrIV	WBGene00001223	ehn-3	-1	5416897	5419234	1737	1.67156	1.50748	0.901843	0.894113	1.19747	.	7.65	4.57656	9.71	6.4412	.	0.4	0.239297		0.28	0.18574		0.12	0.100212
chrII	WBGene00001224	ehs-1	1	5820213	5824064	3251	19.6656	9.65564	0.490991	1.43638e-05	16.9317	.	48.7033	2.47657	20.31	2.10343	.	2.79195	0.141971		2.38255	0.246752		0.845638	0.049944
chrII	WBGene00001225	eif-3.B	1	14795168	14798158	2390	17.0316	10.8391	0.636413	0.0152888	18.8544	.	176.028	10.3354	101.455	9.36009	.	9.47315	0.556211		7.43624	0.686056		6.81879	0.361655
chrI	WBGene00001226	eif-3.C	-1	9976420	9979828	2808	17.0142	10.8237	0.636156	0.00921393	14.797	.	94.8767	5.57631	60.99	5.63485	.	74.03	4.35106		30.69	2.83544		53.9	3.64263
chrIII	WBGene00001227	eif-3.D	-1	8969560	8971701	1541	9.85204	3.96918	0.402878	2.57291e-05	8.29916	.	68.07	6.90923	23.7333	5.97941	.	2.97	0.30146		1.10667	0.278815		0.48	0.0578372
chrI	WBGene00001228	eif-3.E	-1	10640382	10642387	1405	19.8861	12.3342	0.62024	0.0162762	20.6491	.	102.027	5.13055	77.6233	6.29336	.	6.46333	0.325017		5.14	0.416729		4.58667	0.222124
chrII	WBGene00001230	eif-3.G	1	8442415	8444188	1173	21.9872	19.8257	0.901691	0.671133	23.4766	.	105.72	4.80825	71.5367	3.60829	.	16.7297	0.760885		8.15541	0.411356		7.08784	0.301911
chrI	WBGene00001232	eif-3.I	1	2485700	2489775	2022	21.5767	15.6348	0.724615	0.148422	23.638	.	49.0185	2.27183	38.5074	2.46293	.	4.42333	0.205006		3.40667	0.21789		2.54	0.107454
chrIV	WBGene00001241	elo-3	1	7235709	7239885	3512	39.6475	23.5598	0.594232	4.92501e-05	27.0074	.	122.76	3.09629	129.16	5.48222	.	16.4167	0.414066		9.65667	0.409879		13.2667	0.491223
chrIV	WBGene00001244	elo-6	-1	5386619	5388738	1508	23.6485	16.3216	0.690174	0.406052	14.5696	.	44.9013	1.89869	36.7297	2.25037	.	6.89667	0.291632		7.98667	0.489331		5.2	0.356907
chrII	WBGene00001247	elo-9	-1	14959300	14966122	5893	7.58926	4.76523	0.627891	0.00868935	6.65349	.	22.1085	2.91313	26.15	5.48767	.	7.58	0.99878		4.82333	1.01219		7.12	1.07012
chrIV	WBGene00001253	elt-6	1	1917861	1921640	2835	29.9607	20.3681	0.679827	0.0580727	33.2356	.	57.7136	1.92631	39.8155	1.9548	.	138.069	4.60836		196.722	9.65836		161.236	4.8513
chrV	WBGene00001258	emb-4	-1	18860259	18895114	19020	9.44393	10.0525	1.06444	0.088072	8.65936	.	45.8716	4.85726	52.0372	5.17654	.	51.42	5.44477		40.0567	3.98475		29.8067	3.44213
chrIII	WBGene00001259	emb-5	-1	4715256	4720916	5052	15.5069	12.3731	0.797909	0.437513	15.8335	.	71.7633	4.62782	74.7233	6.03917	.	13.29	0.857036		15.5467	1.25649		7.36	0.464836
chrIII	WBGene00001263	emb-9	-1	9336794	9346749	9260	19.5188	18.9511	0.970915	0.155337	22.7986	.	185.997	9.52911	140.1	7.39272	.	7.81	0.400127		6.29667	0.332259		7.24667	0.317856
chrII	WBGene00001281	emb-27	-1	8159777	8162343	1966	10.103	4.97431	0.49236	0.000607449	9.57121	.	19.3033	1.91065	13.1067	2.63487	.	3	0.296941		1.87333	0.376601		1.69333	0.176919
chrIV	WBGene00001320	ent-1	-1	11653395	11656263	1941	8.02885	4.21741	0.525282	0.00279894	9.78207	.	33.7567	4.20442	19.9533	4.73118	.	3.15	0.392335		1.35	0.320101		1.80667	0.184692
chrX	WBGene00001325	eor-2	1	14602843	14608590	4933	24.8875	44.0299	1.76916	2.62305e-17	23.7916	.	92.2467	3.70655	221.783	5.03711	.	17.1733	0.690039		18.65	0.423576		11.94	0.501858
chrIV	WBGene00001328	epi-1	1	10665876	10679421	12945	28.0511	25.4802	0.908349	0.569791	31.5757	.	117.643	4.19389	67.3633	2.64375	.	14.6333	0.521666		13.4367	0.527337		18.22	0.577025
chrX	WBGene00001329	epn-1	-1	14815915	14818747	2232	74.5647	181.241	2.43065	2.46351e-38	73.2529	.	223.557	2.99816	496.993	2.74217	.	26.1241	0.350355		79.7276	0.439899		29.8759	0.407845
chrIV	WBGene00001330	eps-8	1	14872543	14900621	25701	31.5372	28.4768	0.902956	0.752569	28.3281	.	26.5333	0.841334	34.0667	1.1963	.	17.9333	0.56864		36.45	1.27999		16.2733	0.574459
chrI	WBGene00001333	erm-1	-1	5284060	5296469	11657	17.7447	14.0198	0.790084	0.328656	15.5306	.	172.72	9.73363	107.773	7.68724	.	5.18667	0.292295		7.81333	0.557308		5.19333	0.334393
chrI	WBGene00001334	ero-1	1	14663436	14674811	7627	14.1209	10.937	0.774526	0.236145	16.4313	.	149.75	10.6049	115.394	10.5508	.	16.54	1.17131		28.5267	2.60827		22.2933	1.35676
chrX	WBGene00001335	erp-1	-1	3800025	3803447	2821	21.0516	33.209	1.5775	4.83555e-10	21.1372	.	25.8092	1.226	41.2368	1.24174	.	4.12667	0.196026		4.89333	0.14735		2.65333	0.125529
chrIV	WBGene00001338	ears-2	-1	388711	390423	1112	12.2981	8.18165	0.665277	0.135113	11.4541	.	105.967	8.6165	84.8867	10.3752	.	4.28667	0.348563		3.08667	0.377267		5.80667	0.506949
chrII	WBGene00001340	etr-1	1	159598	170628	9783	59.0759	48.2669	0.817031	0.433242	55.4566	.	440.336	7.45373	408.555	8.46449	.	13.4567	0.227786		12.6433	0.261946		7.72	0.139208
chrV	WBGene00001345	fos-1	1	6000661	6016070	14284	21.1357	33.6913	1.59404	3.26992e-10	18.9629	.	166.437	7.87467	252.337	7.48968	.	9.22	0.436229		11.2967	0.3353		5.18667	0.273516
chrII	WBGene00001368	exc-7	1	9576076	9581045	4365	52.1342	40.8316	0.783201	0.239952	41.9226	.	157.917	3.02904	114.373	2.8011	.	52.8967	1.01462		50.35	1.23311		48.3133	1.15244
chrI	WBGene00001377	eya-1	-1	14220727	14231330	8485	20.89	16.511	0.790377	0.287865	19.7249	.	122.604	5.86906	127.918	7.74745	.	1.52	0.0727621		1.35667	0.0821676		4.35333	0.220703
chrIII	WBGene00001386	far-2	1	9081369	9082813	838	2.81623	1.82876	0.649364	0.714485	2.54296	.	2.80667	0.996605	2.54333	1.39074	.	2.31164	0.820829		1.42466	0.77903		1.60959	0.632959
chrI	WBGene00001404	fbp-1	-1	2580937	2586255	2988	29.3887	29.2199	0.994255	0.0862807	40.2657	.	97.9355	3.33242	118.438	4.05332	.	27.56	0.937775		29.7033	1.01655		21.4867	0.533622
chrV	WBGene00001406	fce-2	1	20425016	20431306	3957	9.64797	7.64986	0.792899	0.481944	9.03184	.	39.7105	4.11595	56.4934	7.3849	.	1.29	0.133707		1.57	0.205232		0.6	0.0664316
chrIV	WBGene00001411	fem-1	-1	5533131	5537920	4003	9.93642	6.45441	0.649571	0.024073	12.7949	.	49.9867	5.03065	40.54	6.28098	.	2.39	0.240529		0.626667	0.0970913		1.93333	0.151102
chrIII	WBGene00001412	fem-2	-1	632021	634725	1901	8.59469	3.96581	0.461425	0.0028377	8.86639	.	29.7413	3.46042	26.4737	6.67548	.	2.38667	0.277691		2.71333	0.684182		2.66	0.300009
chrV	WBGene00001423	fib-1	-1	15000634	15002218	984	33.2226	17.966	0.540776	0.000280737	36.7581	.	152.933	4.6033	75.2933	4.19089	.	9.23	0.277823		4.68	0.260493		8.82	0.239947
chrIV	WBGene00001426	fkb-1	1	11036439	11038145	1105	104.105	94.6104	0.908802	0.517226	79.9864	.	129.16	1.24068	71.8333	0.759254	.	16.8953	0.162291		13.1216	0.138691		12.6014	0.157544
chrV	WBGene00001428	fkb-3	1	7225182	7226296	510	45.3373	39.2108	0.864869	0.907844	57.351	.	73.5467	1.62221	68.2	1.73932	.	49.1867	1.08491		48.7333	1.24286		43.1	0.751513
chrV	WBGene00001429	fkb-4	-1	12785136	12787083	1347	9.9369	4.31997	0.43474	0.00701652	7.68374	.	46.89	4.71878	15.4533	3.57719	.	6.14333	0.618235		4.83333	1.11883		6.76	0.87978
chrI	WBGene00001430	fkb-5	-1	3898049	3899776	1125	60.8484	49.4053	0.811941	0.553344	68.4182	.	241.07	3.96182	158.215	3.20238	.	40.2267	0.661096		33.8633	0.685419		27.2733	0.398627
chrV	WBGene00001431	fkb-6	1	20845701	20847706	1390	50.2885	71.2514	1.41685	2.98404e-05	70.2737	.	329.27	6.54762	392.007	5.50174	.	13.1633	0.261756		15.4467	0.216791		11.9667	0.170286
chrI	WBGene00001432	fkb-7	1	10667887	10671005	2386	19.5258	16.7653	0.858624	0.957281	18.0109	.	93.4133	4.7841	57.9267	3.45515	.	10.6567	0.545774		10.9433	0.652737		13.6533	0.75806
chrX	WBGene00001434	fkh-2	-1	3740194	3742283	1488	22.1126	23.4425	1.06015	0.21271	24.3797	.	54.5133	2.46526	70.0933	2.99001	.	7.54333	0.341133		11.04	0.470939		6.4	0.262513
chrII	WBGene00001440	fkh-8	-1	6189551	6191459	1237	12.9503	11.1629	0.861981	0.951283	11.6839	.	41.2123	3.18235	43.4486	3.89224	.	6.81	0.525857		8.50333	0.76175		7.85333	0.672149
chrIII	WBGene00001443	fli-1	-1	8675441	8684437	8299	21.2293	17.3355	0.816582	0.504161	20.5111	.	277.003	13.0482	225.19	12.9901	.	11.4733	0.540448		12.1633	0.701645		7	0.341279
chrIV	WBGene00001444	flp-1	1	9144690	9146105	815	2.14601	2.81595	1.31218	0.204269	1.61963	.	14.3867	6.70391	12.3333	4.37981	.	0.71	0.330846		0.206667	0.0733914		0	0
chrIII	WBGene00001470	flt-1	-1	7650487	7656517	5430	38.7288	31.113	0.803355	0.526575	40.0098	.	261.647	6.75586	413.187	13.2802	.	58.4833	1.51007		43.3467	1.3932		61.16	1.52863
chrV	WBGene00001475	fmi-1	1	13019038	13033384	13661	33.3073	27.4452	0.824001	0.628259	27.5253	.	297.46	8.93079	183.947	6.70232	.	21.09	0.633195		22.5033	0.819937		28.38	1.03105
chrV	WBGene00001479	fmo-4	-1	13603283	13609878	5991	13.161	12.5652	0.954729	0.261752	12.6509	.	31.6967	2.40838	26.56	2.11378	.	5.65333	0.429552		6.62333	0.527118		3.86	0.305117
chrV	WBGene00001480	fmo-5	-1	899313	903576	2970	2.21549	7.17189	3.23716	6.12219e-17	5.58956	.	5.85811	2.64416	16.0967	2.24441	.	3.13	1.41278		11.0567	1.54167		1.80667	0.323221
chrX	WBGene00001484	fox-1	-1	2445794	2456515	9759	28.4892	39.2478	1.37763	3.31402e-09	28.3472	.	206.033	7.23197	366.38	9.33505	.	7.54667	0.264895		12.89	0.328426		12.1733	0.429437
chrI	WBGene00001488	frm-1	-1	14875773	14902948	19132	16.9635	17.4906	1.03107	0.0224633	16.1367	.	95.1757	5.61062	122.06	6.9786	.	6.32333	0.372761		6.00333	0.343232		6.76	0.41892
chrIII	WBGene00001489	frm-2	-1	5976651	5983826	6569	26.3732	19.7991	0.750727	0.362307	20.7933	.	161.413	6.12036	148.97	7.5241	.	4.36333	0.165446		4.62	0.233344		2.76667	0.133056
chrX	WBGene00001490	frm-3	1	11569891	11580873	10381	5.93551	9.56064	1.61075	1.84328e-10	4.80031	.	22.4	3.7739	52.66	5.508	.	55.8967	9.41734		88.8967	9.29819		76.76	15.9906
chrI	WBGene00001491	frm-4	-1	5402898	5409709	6152	18.2281	11.7732	0.645879	0.00227401	16.8118	.	149.91	8.2241	146.63	12.4546	.	17.8467	0.979072		18.8833	1.60393		17.14	1.01952
chrIV	WBGene00001492	frm-5	-1	39226	51237	3169	13.894	11.7816	0.847967	0.857525	12.7125	.	0	0	0	0	.	8.66667	0.623772		10.74	0.911588		7.96	0.626154
chrV	WBGene00001493	frm-7	1	12295266	12306953	11087	54.358	44.753	0.8233	0.600731	68.6957	.	141.583	2.60465	148.283	3.31338	.	3.67333	0.0675767		2.62667	0.0586926		5.07333	0.0738522
chrV	WBGene00001496	frm-10	1	13463108	13467212	3229	15.5745	19.0181	1.22111	0.117463	15.4806	.	54.4467	3.49589	88.0267	4.62857	.	4.23	0.271598		7.67333	0.403475		3.98667	0.257526
chrII	WBGene00001498	fars-3	1	8464725	8467028	1703	17.9287	12.0716	0.673315	0.0589868	17.697	.	65.8867	3.67494	39.47	3.26965	.	88.2933	4.9247		107.453	8.9013		90.9733	5.14061
chrI	WBGene00001501	ftn-2	-1	3680181	3681967	982	28.0799	31.2164	1.1117	0.0217049	30.4134	.	142.403	5.07135	109.31	3.50169	.	26.6667	0.94967		26.4367	0.846884		24.05	0.790769
chrX	WBGene00001502	ftt-2	-1	11603640	11605591	1326	211.328	438.569	2.0753	2.03603e-13	265.364	.	621.213	2.93957	1915.23	4.36699	.	91.6533	0.433702		241.85	0.551452		131.757	0.496513
chrV	WBGene00001506	fut-2	-1	6573966	6575850	1214	4.64003	5.35049	1.15312	0.194199	5.72735	.	3.66456	0.78977	4.45506	0.832644	.	1.69667	0.365658		1.43	0.267265		2.05333	0.358514
chrV	WBGene00001508	fut-8	-1	5986950	5995715	7971	13.92	8.35278	0.600055	0.000258614	11.0522	.	90.9	6.53016	96.58	11.5626	.	2.69	0.193247		1.91	0.228666		1.80667	0.163467
chrII	WBGene00001509	fzo-1	-1	5833307	5836404	2497	13.5477	8.22267	0.606944	0.0532688	12.3056	.	89.47	6.60409	52.7233	6.41195	.	12.5833	0.92882		6.38667	0.776715		13.1333	1.06727
chrII	WBGene00001510	fzr-1	-1	9640936	9646842	5271	71.7001	68.2537	0.951934	0.20412	64.0477	.	158.28	2.20753	270.563	3.96408	.	12.0433	0.167968		21.1467	0.309824		10.9733	0.171331
chrII	WBGene00001511	fzy-1	1	5501492	5503889	1795	10.832	6.82981	0.630519	0.0480601	11.2969	.	46.6567	4.30729	26.83	3.92837	.	3.19333	0.294805		3.75333	0.549552		4.59333	0.4066
chrV	WBGene00001513	gad-1	-1	6431308	6433663	1755	8.27236	4.34074	0.524728	0.00893193	8.63476	.	67.3467	8.14116	30.9233	7.12398	.	1.08333	0.130958		1.77	0.407765		3.38667	0.392213
chrIII	WBGene00001514	xnd-1	1	5603821	5607511	3090	0.736893	0.756472	1.02657	0.661917	0.62589	.	2.69667	3.65951	3.72333	4.92197	.	3.23333	4.38779		2.26333	2.99196		1.68667	2.69483
chrX	WBGene00001520	gas-1	-1	15586745	15590610	2648	8.3935	9.61915	1.14602	0.0249885	9.6318	.	34.0396	4.05547	45.01	4.67921	.	2.16667	0.258136		1.17333	0.121979		3.02667	0.314237
chrII	WBGene00001522	gbh-1	-1	10690392	10693751	2721	13.8942	15.1386	1.08956	0.0525353	14.0044	.	50.1234	3.60751	49.0779	3.24192	.	2.34014	0.168426		2.83673	0.187385		4.06803	0.290482
chrII	WBGene00001523	gbh-2	1	8483959	8487512	2935	23.3993	30.1256	1.28745	1.88422e-05	25.3918	.	39.3667	1.68239	56.5733	1.87792	.	5.49667	0.234907		5.51333	0.183012		9.42	0.370986
chrV	WBGene00001533	gcy-6	-1	10308266	10314479	4846	0.44057	0.239682	0.544028	0.613251	0.186133	.	0.81	1.83853	0.833333	3.47683	.	6.08	13.8003		1.56333	6.52253		4.44	23.8539
chrIV	WBGene00001558	gdi-1	-1	14790788	14792715	1292	61.4807	56.5964	0.920556	0.426603	86.5875	.	209.417	3.40622	241.643	4.26959	.	137.187	2.23138		110.943	1.96026		164.96	1.90513
chrIII	WBGene00001561	gei-4	-1	344298	354797	8738	91.7305	129.221	1.4087	4.13473e-06	106.686	.	625.75	6.82161	834.425	6.45735	.	6.68	0.072822		14.7033	0.113784		12.9	0.120916
chrIV	WBGene00001562	lin-66	1	13887876	13892988	4407	123.176	119.42	0.969508	0.10367	126.115	.	349.78	2.83967	350.767	2.93724	.	68.39	0.555221		76.7667	0.642827		58.1433	0.461034
chrV	WBGene00001563	gei-6	-1	7226357	7230971	3970	17.7106	13.2946	0.750658	0.192203	21.3315	.	139.875	7.89782	105.6	7.94308	.	5.45667	0.308102		3.99	0.300122		8.22	0.385346
chrV	WBGene00001564	gei-7	-1	724208	728007	3142	132.498	122.146	0.921868	0.391393	136.994	.	586.461	4.42618	330.434	2.70524	.	22.0867	0.166694		30.8033	0.252184		19.0933	0.139373
chrIII	WBGene00001565	gei-8	-1	8111100	8127028	15238	22.0126	19.0815	0.866845	0.998676	23.2412	.	120.97	5.49549	100.86	5.28575	.	24.78	1.12572		21.8267	1.14386		29.0933	1.2518
chrI	WBGene00001568	gei-11	1	8962104	8966123	3404	14.0955	9.15864	0.649757	0.0318051	15.2083	.	99.99	7.09377	54.6467	5.96668	.	5.40667	0.383575		4.95667	0.541201		8.82667	0.580385
chrX	WBGene00001569	gei-12	-1	1986197	1989714	2218	5.16231	10.1531	1.96677	5.43729e-09	7.08161	.	26.5065	5.13462	39.2468	3.86551	.	4.07432	0.789245		9.41892	0.927692		8.83108	1.24705
chrIII	WBGene00001570	gei-13	-1	9632104	9641915	9039	47.3278	42.5466	0.898978	0.600738	40.8042	.	311.596	6.58379	350.859	8.24646	.	13.9233	0.294189		20.8033	0.488954		10.8533	0.265986
chrX	WBGene00001572	gei-15	-1	6819967	6823427	2845	12.4044	18.4557	1.48784	1.60735e-06	9.55466	.	51.2767	4.13375	88.39	4.7893	.	12.9167	1.0413		12.88	0.697887		4.82667	0.505164
chrIV	WBGene00001577	gem-4	1	11743989	11748662	4063	13.4477	9.58024	0.712407	0.08661	12.1304	.	131.287	9.76276	83.9867	8.76666	.	2.49667	0.185658		3.26	0.340284		2.78	0.229175
chrIV	WBGene00001579	gex-2	1	572714	583601	8846	11.7409	11.6008	0.98807	0.1419	12.9084	.	163.053	13.8876	109.063	9.40134	.	8.74333	0.74469		6.67333	0.575246		11.6	0.898641
chrIV	WBGene00001580	gex-3	1	12404357	12408665	3708	19.8132	14.865	0.750257	0.175494	20.5076	.	75.96	3.8338	41.52	2.79313	.	6.42333	0.324194		6.69667	0.450498		9.06	0.441788
chrI	WBGene00001582	gfi-2	1	9731624	9744113	11696	35.844	24.4584	0.682359	0.00325908	30.079	.	191.091	5.3312	133.636	5.46381	.	12.8333	0.358033		13.2167	0.540372		8.56667	0.284805
chrX	WBGene00001602	gln-1	1	6058010	6060199	1589	15.5957	45.7797	2.93542	7.41336e-31	18.528	.	52.6467	3.37573	187.057	4.08601	.	15.7133	1.00755		31.22	0.681961		19.9267	1.07549
chrIV	WBGene00001604	gln-3	-1	16167751	16170793	1988	85.3084	164.994	1.93409	2.21055e-24	140.668	.	270.461	3.17039	468.928	2.84209	.	41.8633	0.49073		110.917	0.672246		85.4767	0.607649
chrX	WBGene00001617	glr-6	-1	6836346	6840969	3848	8.21726	14.9367	1.81773	1.78442e-11	7.92568	.	21.16	2.57507	51.3033	3.43471	.	6.95333	0.846187		12.21	0.817449		8.20667	1.03545
chrIII	WBGene00001630	gly-5	1	13187108	13204793	11883	14.6719	12.2014	0.831617	0.626385	14.632	.	105.153	7.16698	84.8667	6.95547	.	10.16	0.692479		9.57667	0.784881		10.6	0.724438
chrIII	WBGene00001631	gly-6	-1	4324261	4331199	6317	17.4501	12.3244	0.706265	0.0350194	14.6815	.	61.6633	3.5337	69.16	5.61165	.	1.89	0.108309		3.50333	0.284261		1.08	0.073562
chrV	WBGene00001632	gly-7	-1	1815851	1821417	3031	11.6145	7.89541	0.67979	0.0417797	14.967	.	81.4357	7.01157	83.6	10.5884	.	6.63667	0.571413		4.44333	0.562774		7.98	0.533173
chrX	WBGene00001637	gly-12	1	7486025	7490651	3576	12.9034	27.972	2.16781	3.46108e-21	17.6342	.	55.6133	4.30998	186.49	6.66702	.	10.5133	0.814773		15.93	0.569497		13.2533	0.751569
chrV	WBGene00001645	gly-20	1	11281643	11286024	3589	22.5082	12.3314	0.547863	1.25141e-05	17.1385	.	112.33	4.99062	98.0967	7.95501	.	22.4367	0.996821		14.09	1.14261		19.2867	1.12534
chrI	WBGene00001647	gna-2	1	7699648	7700958	710	1.71901	0.521831	0.303564	0.052026	1.55352	.	35.04	20.3838	19.5833	37.5281	.	1.91333	1.11304		1.18	2.26127		2.17333	1.39897
chrI	WBGene00001648	goa-1	1	7518817	7526198	6712	70.8053	50.0826	0.707328	0.0128187	58.5869	.	190.357	2.68845	190.857	3.81084	.	105.95	1.49636		117.29	2.34193	Y	90.58	1.54608
chrX	WBGene00001649	gob-1	1	15492882	15497400	3830	12.2286	24.5923	2.01105	2.28968e-17	15.7131	.	62.0867	5.07717	111.99	4.55386	.	6.86	0.56098		9.44	0.38386		4.70667	0.299539
chrIV	WBGene00001653	gon-4	1	10197556	10202987	4818	10.1569	5.30729	0.522529	5.12818e-05	8.75176	.	48.2267	4.74816	38.55	7.2636	.	3.30667	0.325558		0.9	0.169578		2.66	0.303939
chrIII	WBGene00001660	gop-1	1	5254319	5258883	3950	11.959	6.93076	0.579544	0.00104471	12.0704	.	96.3033	8.0528	46.6833	6.73567	.	1.65667	0.138529		0.31	0.0447281		2.17333	0.180055
chrIV	WBGene00001669	gpa-7	1	10403565	10408245	4060	11.5057	9.90382	0.860778	0.974625	9.59113	.	53.4	4.64119	110.11	11.1179	.	7.81206	0.678975		12.6135	1.2736		9.49645	0.990128
chrV	WBGene00001671	gpa-9	-1	12646809	12649714	2026	4.12537	2.51357	0.609296	0.112423	4.28727	.	11.1767	2.70925	15.02	5.97556	.	5.8	1.40593		2.32333	0.924315		4.94667	1.1538
chrII	WBGene00001679	gpb-1	-1	11743329	11751636	7587	69.4918	67.6	0.972778	0.101061	70.2444	.	297.303	4.27824	368.167	5.44625	.	14.3033	0.205828		14.38	0.212722		19.5533	0.278362
chrI	WBGene00001680	gpb-2	-1	7318297	7321567	2608	34.3246	23.4062	0.681909	0.0184631	30.0941	.	90.3133	2.63116	94.8333	4.05162	.	54.42	1.58545		35.2933	1.50786		35.3533	1.17476
chrII	WBGene00001686	gpd-4	1	10169593	10172437	1084	19.7126	10.678	0.541685	0.0474783	20.3423	.	18.1267	0.919545	10.7267	1.00455	.	91.0567	4.6192		43.0767	4.03413		78.2867	3.84848
chrX	WBGene00001687	gpn-1	1	15681656	15687404	4558	1.35717	1.32668	0.97753	0.554348	1.48376	.	6.85	5.04725	5.72333	4.31403	.	1.95862	1.44316		3.37931	2.5472	Y	1.9931	1.34327
chrV	WBGene00001694	grd-5	1	8618134	8619847	1113	6.7062	9.2062	1.37279	0.0120085	7.38365	.	38.6	5.75587	21.0667	2.28831	.	3.74667	0.558687		4.79	0.520302		0.24	0.0325043
chrI	WBGene00001707	grh-1	-1	1259491	1271166	8735	37.6839	40.7171	1.08049	0.00363049	33.6632	.	69.1233	1.8343	68.9733	1.69397	.	5.33	0.14144		5.73	0.140727		9.52	0.282801
chrX	WBGene00001708	grk-1	-1	9991799	9999532	6986	29.6285	40.8392	1.37838	6.41544e-09	27.9415	.	60.9133	2.0559	144.26	3.53239	.	13.5133	0.456092		21.55	0.527679		17.9867	0.643727
chrIII	WBGene00001709	grk-2	1	671304	680042	7667	6.56098	4.78394	0.729151	0.157788	5.69571	.	18.598	2.83464	29.4324	6.15234	.	4.47297	0.681754		2.67568	0.559303		7.70946	1.35356
chrIV	WBGene00001713	grl-4	-1	7309824	7311220	793	2.01576	8.95586	4.44292	1.99968e-06	1.59647	.	6.35667	3.15348	24.8167	2.771	.	3.24333	1.60899		5.62333	0.627894		0.72	0.450995
chrV	WBGene00001714	grl-5	-1	4412733	4414607	1262	20.1315	9.56379	0.475065	2.93948e-05	14.294	.	48.38	2.40319	21.1062	2.20689	.	10.03	0.498223		5.17	0.540581		5.06667	0.354462
chrV	WBGene00001719	grl-10	1	7774517	7775740	623	13.0032	11.1597	0.858227	0.992301	14.4703	.	82.7767	6.36586	55.8367	5.00342	.	4.53	0.348376		3.85	0.344991		5.32	0.367649
chrIII	WBGene00001724	grl-15	-1	12232531	12235601	2007	34.7135	27.4743	0.79146	0.363868	30.2282	.	121.444	3.49847	94.7414	3.44836	.	22.4667	0.647203		24.31	0.884826		15.9333	0.527102
chrI	WBGene00001725	grl-16	-1	572180	575121	2341	10.551	4.03695	0.382611	4.47753e-07	9.55745	.	27.01	2.55994	8.52333	2.11133	.	2.00667	0.190187		1.74	0.431018		4.1	0.428985
chrIII	WBGene00001743	grp-1	1	8085528	8088382	2238	10.7341	7.09875	0.661325	0.0606923	8.33333	.	123.677	11.5218	69.4033	9.77684	.	0.883333	0.082292		2.01667	0.284088		2.3	0.276
chrIII	WBGene00001744	gars-1	-1	5159690	5163377	2935	17.4695	15.7157	0.899606	0.722816	16.114	.	48.88	2.79802	48.83	3.10709	.	46	2.63316		31.6433	2.01349		33.8667	2.1017
chrI	WBGene00001745	gsa-1	1	1068582	1075013	4844	31.1262	30.2295	0.971189	0.43716	29.699	.	95.9258	3.08183	81.1992	2.6861	.	18.89	0.606883		23.6033	0.780806		25.5867	0.861533
chrV	WBGene00001747	gsp-1	1	10680506	10686485	5088	35.3707	25.3705	0.717274	0.041806	33.2501	.	223.07	6.30664	135.083	5.32443	.	14.4533	0.408625		11.9033	0.46918		14.8533	0.446715
chrIII	WBGene00001748	gsp-2	1	7336363	7338697	1715	77.4306	73.0531	0.943465	0.296864	81.4149	.	206.23	2.66342	207.63	2.84218	.	28.7733	0.371602		42.0267	0.57529		39.2733	0.482385
chrII	WBGene00001753	gst-5	1	10950290	10951546	652	5.8773	6.93558	1.18006	0.149813	7.19172	.	17.8933	3.04448	15.2767	2.20265	.	3.39333	0.577363		14.2633	2.05654	Y	6.02667	0.838001
chrII	WBGene00001755	gst-7	1	4882067	4883356	575	12.6104	17.1183	1.35747	0.00520175	15.4574	.	51.7133	4.10084	86.4267	5.0488	.	10.9433	0.8678		22.3567	1.30601		17.9967	1.16428
chrII	WBGene00001764	gst-16	-1	13622895	13624371	597	9.56616	7.39196	0.772719	0.735345	13.5946	.	52.6948	5.50846	54.8519	7.42047	.	4.66667	0.487831		9.49	1.28383		4.45333	0.32758
chrII	WBGene00001767	gst-19	-1	13625474	13627078	466	12.8165	5.83155	0.455002	0.11124	16.8519	.	46.9354	3.6621	37.0408	6.3518	.	2.45333	0.19142		2.21333	0.379545		3.26	0.19345
chrII	WBGene00001768	gst-20	-1	13608115	13609709	702	14.0185	11.75	0.838177	0.861781	17.641	.	72.2372	5.15298	67.6467	5.75717	.	6.73333	0.480317		12.9567	1.1027		9.89333	0.560814
chrI	WBGene00001791	gst-43	1	2901141	2903007	849	7.88516	2.90577	0.368511	0.000105997	9.98704	.	8.94505	1.13442	2.66477	0.917062	.	2.87584	0.364715		2.97651	1.02434		4.75168	0.475784
chrIV	WBGene00001794	gta-1	1	10180545	10183937	2790	21.9448	17.6785	0.805589	0.494171	19.0921	.	54.0433	2.46269	33.18	1.87686	.	28.1667	1.28352		12.8967	0.729512		18.0467	0.945242
chrII	WBGene00001812	haf-2	-1	7353535	7356914	2775	8.44937	9.04973	1.07105	0.0984453	8.95099	.	46.0367	5.44853	27.8333	3.0756	.	5.49333	0.650147		2.04333	0.225789		3.62667	0.405169
chrV	WBGene00001813	haf-3	-1	15760429	15766317	5154	10.8878	6.95867	0.639128	0.00893085	9.41055	.	121.25	11.1364	111.843	16.0725	.	5.82	0.534545		7.74	1.11228		8.82	0.937245
chrI	WBGene00001819	haf-9	1	6080697	6085964	4658	3.27909	2.6565	0.810135	0.738529	4.43205	.	3.26923	0.996993	2.86842	1.07977	.	11.7533	3.58433		8.6	3.23734		8.92	2.01261
chrIV	WBGene00001820	ham-1	1	12542163	12545701	2935	53.8417	41.7918	0.776198	0.590604	55.7392	.	247.427	4.59544	170.123	4.07073	.	11.5833	0.215137		13.0567	0.312422		11.82	0.212059
chrX	WBGene00001821	ham-2	1	4554174	4558829	3966	15.0729	12.3103	0.816717	0.733508	13.6072	.	42.0167	2.78757	54.16	4.39958	.	9.50667	0.630714		10.18	0.826952		4.21333	0.309641
chrX	WBGene00001824	hbl-1	1	5818623	5826399	7176	124.553	146.642	1.17735	2.42897e-05	115.005	.	220.507	1.77039	265.193	1.80844	.	56.3133	0.452125		99.5167	0.678635		46.6067	0.405258
chrIV	WBGene00001827	hcf-1	-1	7770756	7774352	2996	11.4102	6.76986	0.593316	0.0235429	10.784	.	82.927	7.26778	46.0433	6.80122	.	3.27333	0.286877		4.06333	0.600209		3.62667	0.336299
chrX	WBGene00001828	hch-1	-1	14696342	14699905	2763	34.6182	48.0735	1.38868	1.7323e-06	32.65	.	90.15	2.60412	135.333	2.81514	.	17.1333	0.494923		15.3433	0.319164		10.74	0.328943
chrV	WBGene00001829	hcp-1	1	6593888	6599189	4157	10.8167	7.21422	0.666952	0.0279276	12.4246	.	92.2167	8.5254	55.42	7.68205	.	2.32	0.214483		2.71333	0.376109		4.35333	0.350381
chrV	WBGene00001830	hcp-2	1	9645735	9650285	3950	5.69304	3.40785	0.598599	0.0190055	6.42329	.	30.9868	5.44294	13.9868	4.1043	.	2.49667	0.438547		1.77	0.519389		1.68667	0.262586
chrI	WBGene00001832	hcp-4	-1	3862778	3866036	2537	9.52799	5.5203	0.579377	0.00813302	10.3571	.	74.2867	7.79668	35.46	6.42356	.	6.60333	0.693046		5.45333	0.987869		5.07333	0.48984
chrV	WBGene00001834	hda-1	1	14524448	14527398	2201	24.5409	16.5454	0.674199	0.0248646	25.2767	.	138.85	5.6579	74.6467	4.51162	.	14.26	0.581071		13.2833	0.80284		11.5867	0.458393
chrX	WBGene00001837	hda-4	1	16727087	16743726	16007	15.1858	34.7352	2.28735	7.90282e-35	16.0463	.	54.0772	3.56104	264.195	7.60597	.	7.95	0.523516		17.0833	0.491816		5.06	0.315338
chrII	WBGene00001840	hel-1	-1	8326799	8329013	1614	74.022	70.1459	0.947636	0.219239	84.7286	.	297.023	4.01264	388.613	5.54007	.	41.36	0.558753		54.4633	0.776429		39.84	0.470207
chrV	WBGene00001842	her-1	1	9697069	9701527	3844	0.813866	10.3427	12.7082	8.76465e-63	0.76769	.	12.1367	14.9124	95.61	9.24416	.	0.303333	0.372707		3.25667	0.314875		0.846667	1.10288
chrI	WBGene00001843	hgo-1	-1	9049452	9055391	4998	16.179	20.5144	1.26797	3.24021e-05	17.9142	.	73.01	4.51265	79.25	3.86314	.	3.96667	0.245174		5.38333	0.262417		6.28667	0.350933
chrX	WBGene00001844	hid-1	1	2488954	2494330	4598	16.9625	22.2863	1.31386	7.0479e-06	15.6418	.	35.1926	2.07473	56.0967	2.51709	.	15.7432	0.928121		21.1115	0.947285		30.8716	1.97366
chrV	WBGene00001851	hif-1	1	20778559	20785227	5867	41.7761	42.7085	1.02232	0.0365302	41.1606	.	176.777	4.23152	246.22	5.76513	.	22.2933	0.533638		17.07	0.399687		16.8	0.408157
chrV	WBGene00001855	hil-4	1	4754298	4755459	414	3.58816	3.39855	0.947156	0.806431	7.92995	.	16.1833	4.5102	15.26	4.49015	.	5.05344	1.40836		6.95038	2.0451	Y	3.87023	0.488052
chrIV	WBGene00001867	him-8	1	10561818	10563954	1504	4.15991	1.35273	0.325182	0.000627386	2.43551	.	21.8667	5.25653	9.55667	7.06475	.	2.91333	0.700336		1.28333	0.948702		2.9	1.19072
chrV	WBGene00001874	him-17	1	13176600	13180173	2973	16.0849	9.78372	0.608254	0.00348106	14.891	.	130.213	8.09536	85.7	8.75945	.	71.8533	4.46712		20.1767	2.06227		97.08	6.51937
chrX	WBGene00001945	his-71	-1	7981333	7982572	530	17.7066	56.6292	3.1982	1.47303e-28	25.3358	.	74.25	4.19335	139.097	2.45627	.	11.6233	0.656441		26.55	0.468839		10.9733	0.433115
chrIII	WBGene00001946	his-72	-1	12367374	12368970	815	102.099	197.842	1.93775	1.43174e-22	180.552	.	556.69	5.45247	1025.8	5.18494	.	208.78	2.04488	Y	394.897	1.99602		280.92	1.55589
chrII	WBGene00001948	hlh-1	1	4518556	4522454	3152	20.2	18.1309	0.897566	0.727092	19.1916	.	139.427	6.9023	138.493	7.63854	.	15.31	0.75792		10.5133	0.579858		9.64	0.502302
chrI	WBGene00001949	hlh-2	-1	7190846	7194860	3413	58.7287	45.326	0.771786	0.269837	54.9238	.	189.877	3.23312	200.413	4.4216	.	20.3533	0.346565		18.8167	0.415141		20.52	0.373608
chrII	WBGene00001950	hlh-3	1	9086279	9087856	977	31.8685	23.1627	0.726823	0.63434	22.7533	.	97.6333	3.06363	103.927	4.4868	.	19.1767	0.601744		16.8833	0.7289		18.6067	0.817756
chrIII	WBGene00001972	hmg-1.2	1	6280432	6283068	2036	115.837	121.217	1.04644	0.019512	85.3237	.	241.643	2.08606	122.112	1.00738	.	47.8567	0.413137		54.49	0.449525		44.7133	0.524044
chrIII	WBGene00001974	hmg-4	-1	7379077	7381882	1934	15.0936	9.46174	0.626871	0.0160816	21.3345	.	63.0767	4.17904	28.1767	2.97796	.	3.34333	0.221507		3.23	0.341375		4.35333	0.204051
chrII	WBGene00001977	hmg-12	1	11916380	11918256	1071	21.55	25.8235	1.19831	0.0557444	26.4827	.	51.52	2.39072	55.5066	2.14946	.	11.4667	0.532097		8.22	0.318314		10.02	0.37836
chrV	WBGene00001978	hmp-1	1	11845207	11852146	6216	44.2255	38.2037	0.863839	0.963197	36.0458	.	264.11	5.97189	360.25	9.4297	.	34.84	0.78778		29.41	0.76982		21.4467	0.594983
chrI	WBGene00001980	hmr-1	-1	11075751	11137540	51855	36.4229	26.3055	0.722223	0.0159993	32.7834	.	788.254	21.6417	527.665	20.0591	.	4.97667	0.136635		3.67667	0.139768		4.83333	0.147432
chrX	WBGene00001984	hog-1	-1	5851999	5854228	1629	7.82719	20.465	2.6146	1.39746e-16	6.99325	.	17.3167	2.21237	32.4067	1.58352	.	2.95333	0.377317		6.62667	0.323805		5.44	0.777893
chrV	WBGene00001991	hot-6	-1	11021043	11022903	1257	8.86237	6.1778	0.697083	0.271292	5.84646	.	43.2667	4.88206	25.0633	4.057	.	1.49333	0.168503		1.97667	0.319963		1.44	0.246303
chrIII	WBGene00001993	hpd-1	1	10534339	10537585	2481	13.0935	33.717	2.5751	1.12302e-09	17.2628	.	33.2697	2.54093	99.7895	2.95961	.	7.07667	0.540471		15.0933	0.447647		7.85333	0.454928
chrX	WBGene00001995	hpl-1	1	13245284	13246975	1091	5.97021	9.07745	1.52046	0.00241738	5.52246	.	26.4567	4.43145	35.2833	3.88692	.	1.58667	0.265764		3.82	0.420823		2.29333	0.415274
chrIV	WBGene00001999	hrp-1	-1	3336921	3338829	1248	116.927	171.516	1.46686	4.25672e-10	174.133	.	577.97	4.94298	913.727	5.32735	.	91.7233	0.784446		113.707	0.662951		85.0167	0.488229
chrI	WBGene00002000	hrp-2	-1	12060267	12065310	4233	80.1976	67.8488	0.84602	0.836881	81.4541	.	310.993	3.87784	228.467	3.36729	.	23.2133	0.289452		21.7333	0.32032		20.0333	0.245946
chrIV	WBGene00002001	hars-1	1	10858857	10861275	1818	19.3817	13.4579	0.694361	0.365888	19.1177	.	116.803	6.02646	72.71	5.40277	.	3.51667	0.181442		5.47667	0.406947		5.68	0.297107
chrI	WBGene00002004	hsf-1	-1	11953502	11965046	10036	18.4708	19.0082	1.0291	0.0319692	20.5017	.	166.782	9.02949	136.869	7.20052	.	3.44333	0.18642		3.93333	0.206928		0.36	0.0175595
chrIV	WBGene00002005	hsp-1	1	17278625	17281298	1383	69.2708	113.574	1.63957	6.22598e-12	177.812	.	198.253	2.862	283.257	2.49402	.	23.58	0.340403		41.79	0.367952		36.0267	0.202611
chrX	WBGene00002007	hsp-3	-1	6088993	6091991	2262	86.2312	199.449	2.31296	2.21185e-36	127.448	.	517.81	6.0049	1387.37	6.95602	.	88.71	1.02875		276.46	1.38612		123.227	0.966878
chrII	WBGene00002008	hsp-4	-1	7350076	7352615	1872	24.3531	19.3331	0.793865	0.663935	38.7794	.	133.4	5.47774	91.7133	4.74386	.	20.1033	0.825494		23.7333	1.2276		24.1667	0.623183
chrV	WBGene00002010	hsp-6	-1	4824124	4827090	2324	35.0349	34.4705	0.983892	0.395944	54.054	.	200.47	5.72202	150.627	4.36972	.	17.76	0.506924		14.5333	0.421616		19.22	0.35557
chrIII	WBGene00002011	hsp-12.2	1	8137843	8139565	1121	17.7806	16.8162	0.945766	0.67834	14.1855	.	84.27	4.73945	111.123	6.6081	.	7.79667	0.438494		9.71667	0.577815		3.38	0.238271
chrIII	WBGene00002025	hsp-60	1	1619231	1625911	5757	45.6274	33.7916	0.740598	0.464267	56.8312	.	135.943	2.97941	137.463	4.06797	.	6.17	0.135226		7.31667	0.216524		3.98667	0.0701492
chrI	WBGene00002027	hsr-9	1	9626147	9630839	4092	25.3594	23.0997	0.910895	0.560623	30.4764	.	69.6967	2.74836	103.039	4.46062	.	9.30333	0.36686		16.09	0.696546		12.44	0.408184
chrX	WBGene00002029	hst-2	-1	11204044	11207034	2390	6.2069	7.60356	1.22502	0.021637	6.61715	.	35.3067	5.68829	47.3	6.22077	.	48.6	7.82999		59.8067	7.86562		38.6867	5.84642
chrII	WBGene00002030	hst-3.1	-1	6165692	6170281	2738	13.2065	8.22115	0.622506	0.00469714	9.48356	.	29.4567	2.23046	27.7267	3.3726	.	2.69	0.203687		2.08	0.253006		3.02	0.318446
chrX	WBGene00002031	hst-6	1	5275427	5278485	2002	12.4466	22.1064	1.77611	8.93946e-11	12.474	.	66.4833	5.34151	100.793	4.55947	.	2.37667	0.19095		4.75	0.21487		2.29333	0.183849
chrIII	WBGene00002038	hum-5	-1	4029088	4037342	7620	13.1936	15.6608	1.18699	0.000552188	11.4681	.	67.0833	5.08452	80.1633	5.11874	.	7.78	0.589678		15.7	1.00251		10	0.871983
chrX	WBGene00002039	hum-6	1	2302146	2315390	11308	12.1346	20.2741	1.67076	4.87062e-15	9.3012	.	30.7567	2.53462	31.7233	1.56473	.	4.45	0.366719		10.9067	0.537962		3.00667	0.323256
chrIV	WBGene00002043	hyl-1	1	8540469	8544366	3295	17.1305	14.8788	0.868553	0.939884	17.2404	.	58.74	3.42897	60.4333	4.06172	.	10.9567	0.6396		20.7433	1.39416		10.7467	0.623343
chrX	WBGene00002044	hyl-2	-1	4697218	4700448	2627	19.1494	23.7855	1.2421	0.000366247	15.9277	.	85.2133	4.44992	132.65	5.57693	.	6.62667	0.346051		9.56	0.401926		4.94667	0.310571
chrI	WBGene00002047	icp-1	-1	2304472	2306891	1819	14.2147	9.62314	0.676986	0.102099	20.387	.	105.293	7.40737	64.96	6.75039	.	4.78333	0.336507		6.28	0.652593		4.95333	0.242965
chrIII	WBGene00002048	ida-1	1	5755491	5765769	9553	7.10525	8.09829	1.13976	0.00597102	5.71862	.	44.3433	6.24092	88.6967	10.9525	.	12.99	1.82822		19.91	2.45854	Y	13.3	2.32573	Y
chrX	WBGene00002051	ifa-3	-1	16267184	16270741	2607	14.9768	24.5102	1.63654	4.73324e-10	12.8025	.	44.4464	2.96769	45.4312	1.85357	.	6.78667	0.453146		9.57667	0.390722		3.86	0.301505
chrX	WBGene00002052	ifa-4	-1	4912270	4917425	4550	2.88352	5.4222	1.88041	3.45079e-07	2.51604	.	9.93333	3.44487	19.88	3.66641	.	1.27	0.440434		2.36	0.435248		0.36	0.143082
chrII	WBGene00002053	ifb-1	1	5764388	5772056	7046	9.5699	6.38887	0.667601	0.0229978	8.10942	.	52.55	5.49118	41.2733	6.46019	.	9.96	1.04076		5.49333	0.859828		5.55333	0.6848
chrII	WBGene00002054	ifb-2	1	5749935	5754121	3198	10.8246	12.622	1.16605	0.00894719	8.74765	.	33.3	3.07633	23.8733	1.89141	.	2.17333	0.200778		6.81333	0.5398		1.20667	0.137942
chrX	WBGene00002060	ife-2	-1	381382	382808	818	18.3692	23.6302	1.2864	0.00210266	21.4597	.	61.3093	3.33761	57.2784	2.42395	.	15.48	0.842715		15.9167	0.673573		19.9267	0.928564
chrV	WBGene00002061	ife-3	-1	6589	8795	1606	14.1961	12.2861	0.865455	0.928537	18.1694	.	129.52	9.12361	82.4067	6.7073	.	4.03667	0.28435		7.84333	0.63839		14.02	0.771629
chrX	WBGene00002062	ife-4	1	1104033	1106244	1611	41.586	52.202	1.25528	0.000160272	28.3793	.	107.242	2.57879	178.654	3.42235	.	22.8567	0.549624		27.0567	0.518307		18.8267	0.663395
chrIII	WBGene00002064	iff-1	-1	9745779	9747227	825	3.04545	1.73515	0.569751	0.246384	3.42182	.	14.9233	4.9002	11.4067	6.57387	.	1.87667	0.616219		3.53333	2.03633		6.76	1.97556
chrII	WBGene00002065	iff-2	-1	8559342	8561323	1358	42.9311	26.2312	0.611007	0.00354686	36.2209	.	548.583	12.7782	140.693	5.36358	.	20.8167	0.484885		10.97	0.418204		14.12	0.38983
chrII	WBGene00002066	ifg-1	1	8216563	8221459	4296	27.8676	21.9353	0.787127	0.344014	29.3999	.	162.673	5.83737	189.787	8.65212	.	4.4	0.15789		4.75333	0.216698		8.34	0.283674
chrII	WBGene00002068	ify-1	-1	5054081	5055326	645	11.5729	7.85504	0.678746	0.487867	10.369	.	58.2533	5.03361	64.51	8.21256	.	6.72667	0.581245		2.84333	0.361976		4.47333	0.431414
chrI	WBGene00002069	ikb-1	1	9685484	9688639	2511	30.0293	27.4988	0.915733	0.549144	23.6734	.	121.55	4.04772	82.19	2.98886	.	4.60667	0.153406		5.10667	0.185705		2.77333	0.11715
chrX	WBGene00002071	ile-2	1	768355	770771	1815	11.9187	20.5399	1.72333	1.94319e-08	14.7587	.	60.9233	5.11156	102.183	4.97486	.	2.49	0.208915		4.64667	0.226226		4.47333	0.303099
chrV	WBGene00002072	ima-1	1	11239399	11241762	1763	14.6721	7.3287	0.499497	0.000207588	14.2859	.	48.7667	3.32376	24.0133	3.27662	.	4.76667	0.324879		3.53333	0.482123		7.01333	0.490928
chrIV	WBGene00002074	ima-3	-1	7559408	7561898	1890	57.4481	48.1791	0.838654	0.759407	51.1471	.	133.523	2.32424	121.15	2.51458	.	12.3133	0.214338		14.93	0.309885		10.1533	0.198512
chrI	WBGene00002075	imb-1	-1	4920773	4926470	5032	10.8304	6.80227	0.628072	0.00704123	10.661	.	79.8133	7.36939	53.83	7.91354	.	4.05	0.373948		2.28667	0.336163		3.50667	0.328926
chrII	WBGene00002076	imb-2	1	14365405	14373374	3666	24.8998	16.4838	0.662005	0.00254094	25.9385	.	58.1967	2.33724	48.9067	2.96696	.	55.62	2.23376		30.0867	1.82523		38.4733	1.48325
chrI	WBGene00002077	imb-3	-1	310981	315216	3635	23.0825	13.6142	0.589804	0.000222688	26.8259	.	181.081	7.84496	122.085	8.96751	.	16.2133	0.702407		19.8933	1.46122		28.9867	1.08055
chrV	WBGene00002078	xpo-1	1	7804241	7814553	9643	24.3239	30.9693	1.2732	1.24705e-06	31.9021	.	162.13	6.66546	216.023	6.97541	.	27.1967	1.1181		29.7733	0.961384		20.7733	0.651159
chrI	WBGene00002079	xpo-2	-1	318543	323501	4278	7.00947	4.45009	0.634869	0.0297263	8.23305	.	55.9605	7.98356	63.3882	14.2442	.	3.52685	0.503155		2.89597	0.650767		4.25503	0.516823
chrIV	WBGene00002080	xpo-3	-1	7916687	7924218	6271	14.3071	10.7372	0.750479	0.137139	13.2142	.	51.53	3.6017	71.83	6.68982	.	14.5133	1.01441		8.26	0.769288		12.0733	0.913666
chrIII	WBGene00002081	ina-1	-1	9167962	9176067	7495	32.1157	26.1209	0.813339	0.482361	30.9053	.	217.02	6.75745	198.367	7.59416	.	12.5433	0.390567		9.05	0.346465		12.5333	0.40554
chrIII	WBGene00002083	inf-1	1	6929725	6931898	1242	65.7802	45.1566	0.686477	0.0197221	58.6973	.	259.987	3.95235	139.073	3.0798	.	20.4933	0.311543		18.26	0.404371		19.3	0.328806
chrX	WBGene00002124	inx-2	-1	11294898	11296992	1492	124.284	226.439	1.82195	2.67196e-11	159.015	.	334.46	2.69109	898.037	3.9659	.	54.94	0.442051		116.443	0.514236		97.9833	0.61619
chrX	WBGene00002125	inx-3	1	5995784	5998216	1827	134.213	238.267	1.77529	1.5286e-16	165.628	.	338.69	2.52352	614.453	2.57884	.	34.35	0.255936		60.3267	0.253189		33.9733	0.205119
chrV	WBGene00002126	inx-4	-1	7961298	7971530	9627	2.37099	2.08902	0.881076	0.884763	2.40501	.	15.99	6.74402	12.33	5.90229	.	2.40667	1.01505		3.50333	1.67702		3.98	1.65488
chrX	WBGene00002127	inx-5	-1	8299775	8305068	4688	14.7884	24.4057	1.65033	1.13163e-11	14.0917	.	61.4667	4.15641	111.847	4.58281	.	2.08333	0.140876		6.38667	0.261687		2.53333	0.179775
chrIV	WBGene00002129	inx-7	-1	5943969	5946655	2026	13.4405	10.5089	0.781881	0.486874	14.4506	.	18.4367	1.37172	27.0367	2.57274	.	53.1367	3.95347		24.0867	2.29203		71.1667	4.92481
chrV	WBGene00002132	inx-10	-1	9204680	9208998	3717	12.2023	7.90651	0.647952	0.0197278	10.2066	.	58.0667	4.75866	58.6833	7.42215	.	20.3333	1.66635		6.94	0.877758		19.6133	1.92163
chrI	WBGene00002134	inx-12	-1	3755473	3759079	2923	25.0984	17.3209	0.690121	0.210866	24.3271	.	64.36	2.56431	56.5933	3.26734	.	10.87	0.433096		15.9833	0.922777		12.08	0.496566
chrI	WBGene00002137	inx-15	-1	4159016	4161945	2326	8.03676	11.9091	1.48183	0.000101875	7.06965	.	44.45	5.53084	60.4233	5.07372	.	1.41667	0.176273		1.52667	0.128194		1.69333	0.239522
chrII	WBGene00002147	ire-1	-1	8112214	8124979	12131	10.068	9.97589	0.990854	0.121684	9.62031	.	47.7264	4.74042	51.55	5.16746	.	3.69667	0.367171		2.22	0.222537		3.50667	0.364507
chrV	WBGene00002148	gon-14	-1	6606418	6611614	4542	12.0981	7.55185	0.624219	0.00547612	12.7336	.	99.4231	8.21808	96.4775	12.7753	.	5.6	0.462883		4.09	0.541589		7.62	0.598417
chrIV	WBGene00002162	isp-1	-1	8133775	8136252	1877	28.0972	21.9726	0.782019	0.372379	26.2717	.	189.18	6.73305	95.3933	4.34148	.	11.66	0.414988		9.84333	0.447983		2.89333	0.110131
chrIII	WBGene00002169	isw-1	-1	6703940	6710124	5584	10.2079	9.0796	0.889467	0.842014	11.3952	.	61.5951	6.03405	43.7007	4.81306	.	3.45	0.337973		3.46667	0.381808		5.92	0.519515
chrX	WBGene00002177	jkk-1	1	5368548	5372027	2872	13.1079	29.1045	2.22037	2.92244e-20	9.08531	.	16.48	1.25725	54.9563	1.88825	.	13.95	1.06424		24.7333	0.849813		6.87333	0.756533
chrI	WBGene00002179	jph-1	-1	7946830	7954775	7087	26.8404	17.4824	0.651347	0.0013564	20.4254	.	77.0167	2.86943	103.297	5.9086	.	4.66	0.173619		4.24333	0.24272		2.53333	0.124028
chrIV	WBGene00002180	jtr-1	1	1420382	1421769	787	21.0457	18.3316	0.871038	0.834854	22.4066	.	63.7548	3.02934	40.5693	2.21308	.	4.65333	0.221106		4.72	0.257478		5.44	0.242786
chrI	WBGene00002181	kal-1	-1	14128599	14143056	13078	40.8597	31.7056	0.775963	0.389726	40.2827	.	97.7078	2.3913	88.1579	2.78051	.	22.6633	0.554662		27.9767	0.882388		17.62	0.437409
chrIII	WBGene00002182	kap-1	1	7338807	7343562	4136	17.4085	17.9716	1.03235	0.0749161	16.6364	.	50.6907	2.91184	59.2567	3.29724	.	204.55	11.75		181.91	10.1221		148.687	8.93745
chrII	WBGene00002184	kel-1	1	11688206	11695998	6923	10.4148	11.0233	1.05842	0.0406826	11.5202	.	91.8867	8.82266	70.0267	6.35263	.	3.32886	0.319626		2.43624	0.221009		3.5302	0.306437
chrIV	WBGene00002187	kgb-1	-1	405623	410463	3670	20.4751	19.8193	0.967975	0.249501	17.0823	.	127.554	6.2297	109.529	5.52638	.	1.84014	0.089872		4.2585	0.214866		1.59864	0.0935846
chrX	WBGene00002190	kin-2	-1	5971660	5984544	12218	16.5259	22.9405	1.38816	7.18617e-09	15.117	.	57.3967	3.47313	98.8567	4.30926	.	14.57	0.881646		21.5633	0.939966		12.32	0.814974
chrI	WBGene00002191	kin-3	1	10733845	10736596	2148	34.966	23.0619	0.659552	0.00807383	30.933	.	155.943	4.45985	71.6767	3.10801	.	7.93333	0.226887		4.61667	0.200186		6.28	0.20302
chrI	WBGene00002196	kin-10	-1	8288952	8291131	1573	34.4908	25.1847	0.730186	0.129645	40.0019	.	107.703	3.12267	92.4167	3.66956	.	81.89	2.37426		54.9567	2.18215		89.7133	2.24273
chrI	WBGene00002198	kin-14	-1	7075922	7079760	3231	31.0699	41.6396	1.34019	6.89645e-07	51.946	.	2.98333	0.0960199	8.89333	0.213579	.	365.113	11.7513		634.683	15.2423		453.07	8.72194
chrIII	WBGene00002201	kin-18	1	6116663	6124015	6728	15.5074	11.0676	0.713697	0.0542025	16.4163	.	59.41	3.83108	44.6767	4.03672	.	5.87	0.37853		4.33667	0.391836		11.36	0.691994
chrIII	WBGene00002202	kin-19	-1	4084010	4087711	3097	62.7431	50.3552	0.802561	0.656145	67.5828	.	98.4333	1.56883	75.3833	1.49703	.	27.2	0.433514		31.91	0.633698		26.4267	0.391026
chrX	WBGene00002207	kin-25	1	17184622	17193219	7995	14.4724	36.6047	2.52928	4.04314e-37	15.0923	.	83.3967	5.76248	190.25	5.19742	.	8.70667	0.601607		12.2067	0.333473		8.81333	0.583962
chrX	WBGene00002210	kin-29	-1	2843996	2852471	7507	10.9478	25.3776	2.31805	1.78648e-28	9.856	.	39.76	3.63176	164.81	6.4943	.	14.4667	1.32142		24.3667	0.960163		11.6867	1.18574
chrI	WBGene00002213	kin-32	1	5084736	5093809	6850	15.6277	10.5196	0.673137	0.00604274	14.4343	.	143.537	9.18478	127.543	12.1244	.	10.7733	0.689376		6.66333	0.633423		8.80667	0.610121
chrIV	WBGene00002214	klc-1	1	11083183	11086032	2249	11.8008	10.179	0.862566	0.917278	14.4206	.	3.21333	0.272298	4.88333	0.479747	.	25.1267	2.12923		25.5067	2.50582		27.04	1.87509
chrV	WBGene00002215	klc-2	-1	5575394	5582414	6307	45.5472	43.5854	0.956928	0.179543	39.1675	.	14.5225	0.318845	6.22368	0.142793	.	34.3067	0.753212		37.14	0.852121		50.76	1.29597
chrII	WBGene00002216	klp-3	1	7839805	7845592	5179	16.9529	10.9123	0.643686	0.00324861	14.3933	.	42.32	2.49633	39.45	3.61517	.	10.3467	0.610319		10.3833	0.951522		14.2467	0.989811
chrX	WBGene00002220	klp-8	1	3159771	3164419	3462	9.46707	14.7455	1.55756	6.53272e-08	9.3004	.	59.94	6.33142	77.21	5.23617	.	5.66	0.597862		10.12	0.68631		7.00667	0.753372
chrIV	WBGene00002222	klp-11	-1	8755027	8762536	6891	20.8917	15.9837	0.765078	0.175639	16.4506	.	60.65	2.90307	72.84	4.55713	.	9.36333	0.448185		5.69667	0.356404		3.61333	0.219648
chrIII	WBGene00002229	klp-19	-1	13302642	13307130	3884	12.7118	9.10788	0.716492	0.106828	16.1926	.	66.85	5.25891	44.0533	4.83684	.	3.79333	0.298411		7.20333	0.79089		5.78667	0.357365
chrIII	WBGene00002230	klp-20	1	220636	228837	6610	9.83578	6.50424	0.661283	0.0110838	10.6079	.	66.2589	6.73652	66.3133	10.1954	.	4.47667	0.455141		6.39	0.982437		2.29333	0.216192
chrIII	WBGene00002231	knl-1	1	8250459	8253872	2813	10.5866	6.14291	0.580255	0.00408024	11.0526	.	43.4408	4.10339	17.8423	2.90454	.	7.90667	0.746859		5.11	0.831854		9.53333	0.862541
chrX	WBGene00002234	kqt-2	-1	8243084	8246220	2536	1.58438	5.06289	3.1955	5.93159e-10	1.17626	.	7.16	4.5191	30.6433	6.05253	.	0.706667	0.44602		5.16667	1.0205		0.12	0.102018
chrII	WBGene00002238	kars-1	-1	7070144	7072631	1887	15.4679	7.24695	0.468514	1.42433e-05	17.247	.	123.28	7.97003	36.34	5.01452	.	6.62	0.427982		3.4	0.469163		4.22667	0.245067
chrX	WBGene00002239	ksr-1	1	8273768	8283268	8897	10.0256	11.3749	1.13458	0.00387044	10.4794	.	39.2933	3.91929	110.357	9.70177	.	6.08667	0.607111		12.95	1.13847		7.96	0.759587
chrV	WBGene00002241	kup-1	-1	12032237	12041227	8241	38.5726	37.4766	0.971585	0.307052	39.0946	.	237.78	6.16448	117.92	3.1465	.	9.56	0.247844		4.86333	0.12977		9.06667	0.231916
chrIII	WBGene00002244	laf-1	-1	2770498	2780923	7783	27.9575	28.4287	1.01685	0.0372985	31.8029	.	87.0533	3.11377	89.1133	3.13463	.	6.84333	0.244776		5.41333	0.190418		6.15333	0.193483
chrV	WBGene00002246	lag-2	1	3188056	3189839	1069	2.87184	2.65154	0.92329	0.852179	2.68662	.	8.88667	3.09441	7.15667	2.69906	.	2.29	0.797397		2.22667	0.839762		1.81333	0.674949
chrIV	WBGene00002247	lam-1	1	5169859	5179263	8772	33.8291	26.3981	0.780336	0.202532	32.1609	.	46.4767	1.37387	29.4737	1.11651	.	12.45	0.368026		10.5733	0.400534		11.9467	0.371466
chrII	WBGene00002251	lat-1	1	8896647	8908592	11199	55.0759	39.5271	0.717684	0.169663	51.6366	.	334.11	6.06635	287.5	7.27349	.	19.6233	0.356296		13.4767	0.340948		18.5933	0.36008
chrX	WBGene00002261	ldb-1	1	11024245	11040539	15643	44.0151	53.1135	1.20671	8.79245e-06	42.6737	.	333.593	7.57906	543.233	10.2278	.	17.0967	0.388427		18.2033	0.342725		17.4933	0.409933
chrII	WBGene00002262	ldh-1	1	11724627	11726469	1173	34.6151	34.9795	1.01053	0.129564	55.0149	.	154.667	4.46819	94.5667	2.70349	.	27.9067	0.806199		24.6033	0.703364		23.7667	0.432004
chrII	WBGene00002264	lec-1	1	13195376	13199533	3007	52.7032	61.5344	1.16757	0.000192023	64.2288	.	270.343	5.12954	263.303	4.27896	.	15.9667	0.302954		12.2567	0.199184		20.76	0.323219
chrII	WBGene00002266	lec-3	1	9985300	10000287	14259	13.0879	11.8575	0.905986	0.573211	9.07441	.	88.3133	6.74769	90.6567	7.64552	.	7.74667	0.591893		10.8033	0.911098		4.94	0.544388
chrIII	WBGene00002269	lec-6	-1	599506	600636	437	2.69908	11.5446	4.27724	1.00635e-06	3.48055	.	8.18333	3.03189	30.7333	2.66213	.	1.22667	0.454475		5.00667	0.43368		0.726667	0.208779
chrII	WBGene00002275	lem-2	1	14063290	14065829	1161	14.7976	13.8299	0.934604	0.455785	24.671	.	18.28	1.23534	12.4633	0.901188	.	15.0867	1.01954		7.90333	0.571468		13.26	0.537474
chrI	WBGene00002276	lem-3	-1	9578516	9581551	2434	9.10435	5.23151	0.574616	0.00992595	8.29951	.	53.69	5.89718	29.38	5.61597	.	11.16	1.22579		7.95333	1.52027		7	0.843424
chrX	WBGene00002280	let-2	-1	16380525	16389296	8034	32.299	54.4046	1.68441	1.63122e-17	40.3222	.	134.473	4.16339	212.113	3.89881	.	57.0367	1.7659		78.0567	1.43474		32.8567	0.814853
chrII	WBGene00002295	let-19	1	8769647	8781966	11712	27.0192	24.8829	0.920937	0.426826	24.8138	.	158.727	5.87459	169.903	6.82811	.	12.4866	0.462138		7.78859	0.313009		9.24161	0.372438
chrII	WBGene00002297	ect-2	-1	10778336	10783308	4310	10.4412	7.20858	0.690399	0.0658681	12.9441	.	77.9167	7.46244	47.3133	6.56347	.	3.21667	0.308075		3.08333	0.427731		2.53333	0.195714
chrII	WBGene00002299	let-23	1	9196448	9207148	8150	3.15834	3.36632	1.06585	0.117925	2.7811	.	30.19	9.55881	28.7767	8.54841	.	1.19333	0.377835		1.46	0.433708		1.57333	0.565723
chrI	WBGene00002324	let-49	1	14820351	14821754	803	11.5598	6.95766	0.601885	0.0670589	12.3661	.	88.8056	7.68229	45.8986	6.59685	.	4.47333	0.386974		3.40333	0.489149		1.81333	0.146637
chrIV	WBGene00002335	let-60	-1	11688204	11692422	3557	39.0609	28.844	0.738437	0.269759	36.0651	.	114.04	2.91955	89.0133	3.08603	.	21.6067	0.553154		26.0767	0.90406		36.22	1.0043
chrIV	WBGene00002344	let-70	-1	11081063	11082854	940	115.845	184.951	1.59654	2.40625e-14	151.161	.	479.39	4.13821	520.4	2.81373	.	70.4767	0.608372		126.417	0.683516		77.7733	0.514506
chrI	WBGene00002348	let-75	-1	7258919	7267071	6837	2.07554	2.17398	1.04743	0.214653	2.51134	.	12.0633	5.81213	16.3	7.49777	.	3.7	1.78266		3.01667	1.38762		2.54	1.01141
chrIV	WBGene00002363	let-92	1	11857336	11860439	2502	76.5673	73.9464	0.96577	0.194772	77.3675	.	517.763	6.7622	613.22	8.29276	.	37.8233	0.493988		62.7467	0.848542		45.87	0.592885
chrIV	WBGene00002368	let-99	1	12567471	12570601	1252	1.70208	2.04393	1.20084	0.255321	2.70288	.	10.6971	6.28474	13.4048	6.55833	.	1.71667	1.00857		1.87333	0.916535		0.24	0.0887943
chrII	WBGene00002497	let-268	-1	10033248	10039868	4701	41.0815	47.4756	1.15565	0.000228016	45.1972	.	112.717	2.74373	108.793	2.29156	.	7.58667	0.184674		9.07667	0.191186		4.22667	0.0935161
chrV	WBGene00002632	let-413	-1	7972904	7978784	5272	47.0378	35.5547	0.755875	0.114042	43.6863	.	155.333	3.30231	171.943	4.83602	.	33.5967	0.714248		36.4867	1.02621		25.1067	0.574704
chrV	WBGene00002637	let-418	1	5825930	5832844	6232	24.7254	20.2831	0.820331	0.540018	26.8617	.	152.853	6.18202	174.95	8.62543	.	3.06	0.123759		3.57	0.176009		1.44667	0.0538561
chrI	WBGene00002694	let-502	-1	4738251	4745453	6464	23.8453	14.1354	0.592798	3.38944e-05	24.2774	.	241.213	10.1158	140.05	9.90772	.	22.8667	0.958959		30.6567	2.16878	Y	27.1333	1.11764
chrIV	WBGene00002827	let-653	1	11883743	11891057	5809	13.1966	8.19203	0.620769	0.00142457	12.4266	.	50.9267	3.85908	43.64	5.32713	.	9.53	0.722156		8.89333	1.08561		6.03333	0.485518
chrIII	WBGene00002845	let-711	1	6946542	6958816	11664	42.5687	43.451	1.02073	0.02816	47.0708	.	207.713	4.87948	249.427	5.74041	.	2.47333	0.0581021		1.90333	0.0438041		3.62667	0.077047
chrIII	WBGene00002879	let-754	-1	7949915	7952150	1614	19.6639	11.8278	0.601497	0.00708174	20.609	.	61	3.10213	32.5586	2.75273	.	9.41667	0.478881		5.83	0.492908		7.72667	0.374916
chrIII	WBGene00002881	let-756	1	6402677	6409965	6686	10.2634	7.24821	0.70622	0.0688474	7.31424	.	62.69	6.10812	87.3233	12.0476	.	2.89	0.281583		2.29333	0.3164		1.44667	0.197788
chrII	WBGene00002957	let-858	1	11022218	11027861	4948	9.04325	7.24111	0.80072	0.64001	9.09842	.	132.114	14.6091	97.2617	13.4319	.	1.08333	0.119795		1.66667	0.230167		0.966667	0.106246
chrIV	WBGene00002974	lev-1	-1	13174147	13179309	4546	6.95535	4.09558	0.588839	0.00508804	5.26221	.	22.4333	3.22534	13.33	3.25473	.	5.18333	0.74523		3.43	0.837489		4.34667	0.826016
chrI	WBGene00002978	lev-11	-1	14620748	14631012	9059	45.8852	40.6248	0.885357	0.744394	42.3009	.	220.533	4.8062	233.768	5.75432	.	16.9867	0.370199		20.4767	0.504044		21.9867	0.519768
chrII	WBGene00002980	lgg-1	-1	6346925	6348483	958	165.339	391.356	2.36699	1.07531e-23	195.967	.	466.637	2.8223	780.423	1.99415	.	97.7233	0.591047		147.94	0.378019		76.42	0.389963
chrIV	WBGene00002981	lgg-2	-1	10934170	10937003	2233	68.2333	97.3856	1.42724	9.33783e-10	67.2049	.	324.317	4.75305	369.527	3.79447	.	10.3233	0.151295		19.2567	0.197736		3.74	0.0556507
chrV	WBGene00002985	lig-1	1	10813916	10816697	2181	11.511	8.03164	0.697736	0.148307	10.9789	.	55.63	4.83277	47.22	5.87925	.	4.09667	0.355891		4.58667	0.571075		3.26	0.296933
chrX	WBGene00002987	lim-4	-1	3869734	3873387	2985	5.91843	7.94707	1.34277	0.00184523	4.41039	.	20.9867	3.54599	59.1767	7.44635	.	2.02333	0.34187		3.85	0.484455		3.37333	0.764861
chrI	WBGene00002989	lim-7	1	5716588	5725359	8157	21.0631	15.4522	0.733616	0.222525	16.7527	.	61.23	2.90697	47.1133	3.04896	.	8.31	0.394528		9.05667	0.586107		5.42	0.323529
chrX	WBGene00002991	lin-2	-1	12399450	12415896	14623	9.8275	18.0467	1.83635	2.36209e-19	8.1925	.	22.5567	2.29526	67.4433	3.73715	.	2.57667	0.262189		3.55	0.196711		1.56667	0.191232
chrII	WBGene00002994	lin-5	1	7860536	7863511	2375	18.4425	12.0821	0.655122	0.0231348	22.0556	.	53.9211	2.92373	34.0844	2.82107	.	16.2833	0.882923		9.62333	0.796495		20.1667	0.914357
chrII	WBGene00002997	lin-8	1	3055807	3060251	3466	16.1395	17.8699	1.10721	0.0596143	17.0167	.	41.873	2.59444	53.3361	2.98469	.	10.9833	0.680525		10.0367	0.561653		12.08	0.709889
chrIII	WBGene00002998	lin-9	-1	8900157	8904144	2847	14.4858	11.4168	0.788136	0.668833	17.1658	.	99.4008	6.86196	66.1107	5.79067	.	4.94257	0.341201		5.27703	0.462218		4.16216	0.242468
chrIII	WBGene00003002	lin-13	-1	7700069	7710095	9062	33.8684	45.4824	1.34292	0.0044233	40.6859	.	341.729	10.0899	332.25	7.30502	.	27.48	0.811376		34.2967	0.754065		22.0867	0.542857
chrX	WBGene00003003	lin-14	1	11465525	11484202	18040	26.8721	42.2865	1.57362	5.23382e-15	23.314	.	62.8133	2.3375	122.683	2.90124	.	22.3967	0.833455		24.66	0.583165		11.3267	0.485831
chrI	WBGene00003006	lin-17	1	2703463	2717551	11605	21.815	17.2781	0.792029	0.299419	23.0748	.	54.6063	2.50316	36.14	2.09167	.	7.52333	0.344871		9.02	0.522049		2.52667	0.109499
chrII	WBGene00003009	lin-23	1	6370436	6374502	3452	52.2572	53.8079	1.02967	0.0378252	45.5928	.	173.627	3.32254	237.277	4.4097	.	18.9667	0.362948		21.25	0.394923		14.0133	0.307358
chrIV	WBGene00003010	lin-24	1	12128052	12135410	6615	12.3216	12.3488	1.0022	0.123246	10.4065	.	35.8333	2.90817	44.4533	3.59982	.	6.42333	0.521306		10.93	0.88511		3.25333	0.312625
chrV	WBGene00003011	lin-25	1	12649850	12658701	5717	14.4047	13.0513	0.906049	0.617668	13.4766	.	236.064	16.388	162.256	12.4321	.	2.68	0.186051		2.56667	0.196659		2.41333	0.179075
chrI	WBGene00003020	lin-35	1	5807603	5815640	7427	12.3818	12.4527	1.00573	0.121764	18.1559	.	88.0433	7.11072	96.5567	7.75389	.	3.56	0.287519		5.79	0.46496		3.86667	0.21297
chrIII	WBGene00003021	lin-36	-1	8016597	8020999	3788	21.5271	21.3465	0.991612	0.144377	21.3685	.	171.027	7.94473	145.877	6.83375	.	15.1633	0.704385		18.78	0.87977		12.4267	0.58154
chrV	WBGene00003025	lin-40	1	3703276	3712845	7374	22.7221	28.1124	1.23723	1.24614e-05	32.3491	.	109.093	4.8012	149.557	5.31996	.	10.5867	0.465919		18.06	0.642421		16.3933	0.506763
chrIV	WBGene00003034	lin-49	1	8620389	8626131	5123	15.5624	12.7535	0.819507	0.590433	15.5668	.	187.743	12.0639	139.903	10.9698	.	11.5033	0.739176		10.49	0.822522		5.91333	0.379869
chrI	WBGene00003036	lin-53	-1	9618193	9619920	1127	21.0288	14.1282	0.67185	0.077611	22.7196	.	139	6.60997	62.0067	4.38885	.	5.74333	0.273117		3.96	0.28029		2.78	0.122361
chrI	WBGene00003040	lin-59	-1	3713520	3721410	7251	49.1775	50.0533	1.01781	0.0357714	48.3363	.	234.143	4.76119	273.487	5.46391	.	57.02	1.15947		58.8533	1.17581		47.7133	0.987112
chrI	WBGene00003041	lin-61	-1	7248826	7251428	2002	17.7075	16.3024	0.92065	0.59973	21.546	.	63.3233	3.57607	29.8733	1.83244	.	4.72	0.266553		3.65	0.223893		3.26	0.151305
chrIV	WBGene00003043	lip-1	1	6839316	6844955	5021	12.7923	7.40231	0.578655	0.000391592	9.87911	.	41.7933	3.26708	56.2567	7.59988	.	16.3967	1.28176		9.48	1.28068		10.9867	1.11211
chrII	WBGene00003045	lir-2	1	7667175	7671855	4065	13.5731	9.59483	0.706903	0.0815492	13.416	.	72.2167	5.32059	42.0667	4.3843	.	51.5767	3.79993		39.1833	4.08379		45	3.35421
chrII	WBGene00003046	lir-3	-1	11183016	11185012	1351	8.93449	4.57291	0.511826	0.00586199	6.4567	.	34.9433	3.91106	31.17	6.81623	.	4.59667	0.514485		5.11	1.11745		5.67333	0.878674
chrIII	WBGene00003047	lis-1	-1	13371070	13377244	5430	11.0582	9.74558	0.881299	0.892621	11.9683	.	49.844	4.50742	57.94	5.94526	.	3.97	0.35901		2.08667	0.214114		6.29333	0.525832
chrIII	WBGene00003048	lit-1	1	13697973	13723972	23637	40.3669	38.3378	0.949734	0.194068	39.8381	.	337.131	8.35167	377.65	9.85058	.	2.7	0.0668865		4.23667	0.110509		3.74	0.0938799
chrI	WBGene00003052	lmn-1	1	8762105	8765627	2922	26.2938	19.7582	0.75144	0.270263	25.6557	.	64.94	2.46978	79.86	4.04186	.	22.9067	0.871181		24.52	1.241		27.5067	1.07215
chrX	WBGene00003053	lmp-1	-1	6376422	6378517	1495	29.9401	61.1094	2.04105	2.45591e-19	41.8421	.	177.953	5.94364	252.423	4.13068	.	14.0267	0.46849		33.4333	0.547107		22.8267	0.545543
chrI	WBGene00003062	lpd-6	-1	3144413	3147862	1701	7.06173	5.61993	0.795829	0.594879	6.47325	.	75.7403	10.7255	62.7911	11.1729	.	0.69	0.0977098		1.04	0.185056		2.17333	0.335741
chrIII	WBGene00003063	lpd-7	1	7573067	7575202	1535	20.1156	15.0606	0.748701	0.272877	23.3016	.	219.903	10.932	112.843	7.49263	.	3.98333	0.198022		3.22667	0.214246		5.8	0.24891
chrI	WBGene00003068	lrk-1	-1	10879759	10895114	14359	14.1472	13.1744	0.931232	0.364083	13.4525	.	140.28	9.91573	201.967	15.3303	.	2.07333	0.146554		2.45667	0.186473		4.71333	0.350368
chrI	WBGene00003071	lrp-1	1	7608465	7634139	25021	22.5943	24.8388	1.09934	0.0020212	22.3434	.	138.87	6.14623	94.8167	3.81728	.	12.56	0.555891		16.2733	0.655157		11.2267	0.50246
chrI	WBGene00003072	lrp-2	-1	3935272	3959596	23562	17.0926	14.9728	0.87598	0.931805	19.3102	.	108.924	6.37259	79.2069	5.29005	.	3.93	0.229924		5.02	0.335275		0.84	0.0435004
chrV	WBGene00003075	lrx-1	1	12252693	12255375	2076	4.30997	2.35573	0.546577	0.0438937	2.72158	.	11.4433	2.65508	6.18667	2.62622	.	56.6567	13.1455		48.7	20.673		48.4	17.7838
chrI	WBGene00003083	lst-1	1	10585697	10590455	4101	23.9632	16.2724	0.679057	0.0142775	23.1924	.	91.3933	3.81391	83.7567	5.14717	.	19.16	0.79956		21.3133	1.30979		13.0267	0.561678
chrX	WBGene00003084	lst-2	-1	4378005	4388890	10199	12.7879	27.3677	2.14013	4.3825e-27	13.6407	.	227.027	17.7533	424.317	15.5043	.	4.29	0.335474		5.54667	0.202672		3.02	0.221397
chrIV	WBGene00003085	lst-3	1	14071143	14076719	4962	54.0801	75.5911	1.39776	9.46943e-10	61.0544	.	182.392	3.37262	156.014	2.06391	.	60.1933	1.11304		72.4433	0.958358		68.5033	1.122
chrIV	WBGene00003086	lst-4	-1	14060980	14071024	7738	13.1495	14.3664	1.09254	0.00824392	16.3141	.	57.6125	4.38134	53.241	3.70594	.	4.67333	0.355399		8.98667	0.625535		5.79333	0.355112
chrX	WBGene00003087	lsy-2	1	2089679	2093240	2763	31.2094	37.9233	1.21512	0.000152426	35.048	.	101.217	3.24315	98.4267	2.59542	.	22.6133	0.724569		31.2433	0.823856		26.8133	0.765047
chrII	WBGene00003089	ltd-1	-1	8088442	8094406	5355	34.2128	24.8481	0.726281	0.0441476	29.2308	.	136.693	3.99539	149.66	6.023	.	16.6733	0.487342		10.9967	0.442556		18	0.615789
chrV	WBGene00003090	lys-1	1	10277802	10279102	672	7.35342	7.11086	0.967014	0.61111	6.24554	.	16.3384	2.22187	21.7374	3.05692	.	4.56	0.620119		9.50333	1.33645		1.93333	0.309554
chrIII	WBGene00003102	mab-5	-1	7776842	7786792	9157	15.0735	9.76035	0.647517	0.00582123	10.3333	.	120.866	8.01842	122.743	12.5757	.	4.34	0.287923		5.13333	0.525938		6.02667	0.583228
chrII	WBGene00003106	mab-9	1	516019	521622	4790	4.99081	3.00271	0.601648	0.024537	2.87119	.	20.1867	4.04476	15.5767	5.18753	.	0.58	0.116214		1.46	0.486227		0.966667	0.336678
chrI	WBGene00003111	mab-20	-1	1644590	1651386	5017	41.862	42.218	1.0085	0.0534086	46.4959	.	147.309	3.51893	180.333	4.27148	.	18.9567	0.452837		24.14	0.571795		13.4	0.288197
chrIII	WBGene00003112	mab-21	1	4600707	4603019	1712	11.0091	6.04118	0.548747	0.129341	10.59	.	37.6267	3.41779	26.3667	4.36449	.	3.59	0.326095		2.18333	0.361408		4.46667	0.421783
chrII	WBGene00003119	mac-1	-1	13311146	13321407	6052	26.3677	27.3348	1.03667	0.0232793	25.085	.	40.323	1.52926	86.7215	3.17257	.	144.688	5.48731		253.35	9.26843		147.081	5.86331
chrI	WBGene00003132	mat-1	-1	5123929	5127616	3087	33.5755	25.5701	0.761572	0.296042	34.3131	.	117.69	3.50524	135.77	5.30971	.	41.7133	1.24237		28.42	1.11145		26.0533	0.759283
chrI	WBGene00003136	mau-2	1	8124775	8130081	4676	5.76861	3.75503	0.650942	0.0563284	5.67707	.	39.8967	6.91617	42.1733	11.2312	.	9.94667	1.72428		7.11	1.89346		10.1333	1.78496
chrIV	WBGene00003148	mbf-1	-1	11479336	11480541	605	25.9281	40.5017	1.56208	0.012059	45.9488	.	252.847	9.75184	217.443	5.36875	.	10.36	0.399567		12.5667	0.310275		10.0133	0.217924
chrX	WBGene00003149	mbk-1	-1	14819844	14824759	4299	33.2585	54.478	1.63802	1.48662e-14	34.1854	.	119.087	3.58063	249.667	4.58289	.	13.0646	0.39282		27.051	0.496549		18.483	0.540669
chrIV	WBGene00003151	mca-1	-1	9625893	9635763	9212	9.59737	12.8739	1.3414	2.51858e-06	12.6705	.	26.2767	2.7379	43.0467	3.34371	.	2.19667	0.228882		3.96	0.307599		2.9	0.228877
chrV	WBGene00003155	mcm-3	-1	15056702	15059710	2408	8.78488	6.72986	0.766073	0.435994	9.93646	.	52.5433	5.98111	39.0633	5.80448	.	3.77333	0.429526		3.01667	0.448251		6.40667	0.644763
chrI	WBGene00003156	mcm-4	-1	2318293	2321914	3002	9.96136	6.36542	0.639012	0.0293325	14.052	.	23.47	2.3561	18.9667	2.97964	.	26.88	2.69843		23.5433	3.69863		23.4267	1.66715
chrIII	WBGene00003157	mcm-5	-1	4288233	4291411	2570	10.3543	6.18988	0.597809	0.0105166	10.3253	.	32.5984	3.1483	27.6887	4.47322	.	16.66	1.609		11.0433	1.78409		17.2667	1.67227
chrIII	WBGene00003158	mcm-6	1	9794168	9798558	3787	7.32638	4.01624	0.548189	0.00156876	7.291	.	53.5629	7.31097	21.9029	5.45358	.	2.89	0.394465		3.33333	0.829964		4.71333	0.64646
chrV	WBGene00003159	mcm-7	1	4347066	4349761	2095	26.6974	24.7783	0.928117	0.45826	35.2802	.	145.307	5.44273	104.187	4.20476	.	8.88333	0.332742		12.5433	0.506223		11.5867	0.328418
chrV	WBGene00003160	mdf-1	-1	9541758	9544344	1986	10.7591	6.607	0.614087	0.0258841	8.96677	.	86.4067	8.03106	34.7267	5.25604	.	171.78	15.9661		99.25	15.0219		93.5533	10.4333
chrIV	WBGene00003161	mdf-2	-1	2636229	2641090	2966	13.7389	11.0327	0.803028	0.477286	19.397	.	21.64	1.57509	21.1111	1.9135	.	6.99667	0.509261		8.36667	0.758351		4.58667	0.236463
chrIII	WBGene00003162	mdh-2	-1	6606197	6608228	1431	30.6698	19.0262	0.620356	0.00529158	34.0964	.	114.483	3.73277	62.4233	3.28091	.	9.25667	0.301817		3.88667	0.20428		5.79333	0.16991
chrX	WBGene00003163	mdl-1	1	6742360	6743863	903	94.2326	207.016	2.19686	2.42827e-29	109.503	.	292.06	3.09935	599.363	2.89525	.	43.71	0.463852		106.307	0.513519		47.4933	0.433718
chrI	WBGene00003170	mec-6	1	6724923	6728331	2805	16.6693	13.4119	0.804587	0.532301	14.5715	.	44.94	2.69597	71.95	5.36462	.	17.3067	1.03823		9.99667	0.745356		10.7333	0.736599
chrX	WBGene00003171	mec-7	-1	7774805	7776607	1005	9.45572	18.303	1.93565	1.42097e-08	14.8955	.	27.2967	2.88679	53.15	2.9039	.	34.6667	3.66621		61.3267	3.35064		35.06	2.35373
chrIII	WBGene00003175	mec-12	-1	3131566	3139195	6545	4.99969	3.62735	0.725514	0.431302	4.66356	.	21.6221	4.32468	23.4128	6.45452	.	4.58333	0.916723		2.35333	0.648775		2.89333	0.620413
chrI	WBGene00003182	mef-2	1	9095832	9100179	3747	9.20056	8.65906	0.941145	0.504322	6.63277	.	54.86	5.96268	110.847	12.8012	.	5.34667	0.581124		3.15667	0.364551		5.66667	0.854344
chrI	WBGene00003183	mei-1	1	8294084	8296976	2286	16.4329	9.93898	0.604824	0.00528271	16.3806	.	23.07	1.4039	10.625	1.06902	.	5.64	0.343215		2.25	0.226381		5.56	0.339426
chrX	WBGene00003185	mek-1	1	7478600	7480955	1755	21.4724	33.0937	1.54122	2.91691e-08	27.3105	.	79.7867	3.71578	143.5	4.33617	.	24.83	1.15637		45.5	1.37488		37.19	1.36175
chrII	WBGene00003196	mel-11	1	9356994	9369040	11092	31.7607	29.7908	0.937977	0.301311	28.4379	.	191.493	6.02926	209.163	7.02107	.	21.43	0.674734		20.5567	0.690034		24.3333	0.855665
chrI	WBGene00003209	mel-26	1	9129021	9135742	5827	27.1933	24.5249	0.901872	0.684724	23.434	.	194.1	7.13778	209.983	8.56205	.	15.7233	0.578206		14.7333	0.60075		14.9733	0.638957
chrIV	WBGene00003218	mep-1	1	11523946	11527929	3382	67.4457	74.5852	1.10585	0.00161865	82.7924	.	269.227	3.99175	257.453	3.4518	.	49.35	0.731699		72.9667	0.9783		76.0833	0.918965
chrIII	WBGene00003234	mif-1	1	11847758	11849934	1463	8.99316	6.39713	0.711332	0.225149	11.9822	.	18.0245	2.00425	10.2772	1.60653	.	1.98667	0.220909		1.70333	0.266265		1.93333	0.16135
chrIV	WBGene00003237	mif-4	-1	6335220	6336873	1036	2.85618	2.0362	0.71291	0.648346	4.87934	.	8.77128	3.07098	5.84173	2.86894	.	4.93333	1.72725		5.77333	2.83535		6.88	1.41003
chrI	WBGene00003238	mig-1	-1	948569	957384	6241	30.4422	24.6239	0.808874	0.522584	36.2712	.	218.032	7.16216	197.691	8.02842	.	15.48	0.508504		24.83	1.00837		13.7467	0.378997
chrX	WBGene00003239	mig-2	1	11546838	11550634	3175	33.8054	55.3191	1.6364	1.69427e-13	35.9617	.	142.367	4.21136	291.093	5.26208	.	16.8867	0.499526		30.46	0.550624		22.4733	0.624924
chrII	WBGene00003241	mig-5	-1	8182269	8185073	2202	18.3315	12.0329	0.656406	0.0315006	22.4469	.	59.0967	3.22377	53.7133	4.46386	.	5.42	0.295666		4.47	0.371481		6.28667	0.280069
chrV	WBGene00003242	mig-6	1	7826726	7842365	15013	23.4904	22.3911	0.953204	0.211268	26.753	.	47.1833	2.00862	44.6567	1.99439	.	22.8167	0.97132		33.26	1.48541		26.3467	0.98481
chrIII	WBGene00003243	mig-10	1	8278108	8305761	26530	42.8359	29.799	0.695656	0.110792	33.3722	.	606.53	14.1594	651.913	21.877	.	3.25	0.075871		3.02	0.101346		2.05333	0.0615283
chrX	WBGene00003245	mig-13	-1	4796059	4802244	5522	19.2311	22.5918	1.17476	0.00275672	18.6987	.	65.7233	3.41756	90.1367	3.98979	.	7.97569	0.41473		12.9826	0.574661		5.65278	0.302309
chrX	WBGene00003247	mig-15	-1	10421595	10435450	13234	31.2173	53.3781	1.70989	8.04578e-19	31.1505	.	115.883	3.71215	408.367	7.65045	.	22.1133	0.708367		46.17	0.864961		19.9133	0.639262
chrV	WBGene00003248	mig-17	1	11446644	11449228	1984	7.94178	6.74572	0.849395	0.962751	5.0756	.	32.544	4.09782	46.128	6.83812	.	5.1	0.642173		4.14	0.613723		3.74	0.736858
chrIII	WBGene00003253	mig-22	-1	8763210	8767951	4138	17.4921	13.098	0.748793	0.17447	19.2622	.	75.1167	4.29431	37.12	2.83402	.	8.74333	0.499843		10.21	0.779509		6.77333	0.351639
chrII	WBGene00003367	mix-1	1	10824234	10841763	14429	14.1685	12.3482	0.871526	0.901299	15.1277	.	108.277	7.64206	154.18	12.486	.	2.29667	0.162097		6.01333	0.48698		3.62667	0.239737
chrX	WBGene00003368	mkk-4	1	10026456	10030071	2984	16.0565	23.245	1.4477	3.70149e-07	10.5436	.	38.9932	2.4285	112.955	4.85935	.	6.97667	0.434508		15.1733	0.652758		7.85333	0.744846
chrX	WBGene00003369	mlc-1	1	17459087	17460693	565	27.8646	43.6956	1.56814	3.16578e-08	23.7239	.	79.1433	2.84028	82.99	1.89928	.	8.55333	0.306961		16.3033	0.373112		4.33333	0.182657
chrIII	WBGene00003371	mlc-3	1	5564990	5567344	1754	43.4547	37.6277	0.865907	0.99706	44.309	.	209.973	4.83201	201.513	5.35545	.	78.4667	1.80571		105.757	2.81061		69.86	1.57665
chrIII	WBGene00003372	mlc-4	-1	3392002	3395297	2328	36.9025	28.2756	0.766224	0.237204	39.018	.	86.2056	2.33604	70.1118	2.47959	.	16.5867	0.449473		12.8933	0.455989		19.0733	0.488834
chrV	WBGene00003374	mlk-1	-1	5056364	5065122	8039	14.1506	15.5027	1.09555	0.0127223	14.2581	.	88.9233	6.28408	126.133	8.13623	.	8.49667	0.600447		10.3867	0.669992		8.09333	0.56763
chrIII	WBGene00003375	mlp-1	-1	5971481	5975411	3322	33.7152	22.5829	0.669814	0.00785555	21.4371	.	102.173	3.03048	61.2867	2.71385	.	12.7467	0.378068		6.52667	0.289009		5.54	0.258431
chrIII	WBGene00003378	mml-1	-1	7370066	7376466	5740	22.6433	32.6878	1.4436	1.54996e-09	35.8017	.	85.4433	3.77345	100.763	3.0826	.	6.05	0.267187		13.58	0.415445		12.0867	0.3376
chrX	WBGene00003384	moc-1	-1	10136068	10138735	2067	5.72859	9.47605	1.65417	2.73047e-05	5.33962	.	24.4467	4.26748	44.1067	4.65454	.	4.89333	0.854195		5.06667	0.534681		4.34667	0.81404
chrV	WBGene00003395	mom-2	1	8356045	8358168	1523	17.0515	14.2915	0.838137	0.806186	19.8963	.	38.3233	2.2475	41.02	2.87023	.	5.47667	0.321183		8.01667	0.560938		6.88667	0.346129
chrI	WBGene00003396	mom-4	-1	9895683	9900642	4344	11.6751	8.2614	0.70761	0.0961925	10.4369	.	90.375	7.74085	83.6367	10.1238	.	7.76333	0.66495		10.1933	1.23385		8.09333	0.775452
chrIII	WBGene00003406	mrg-1	-1	12871167	12874729	1744	21.957	17.4948	0.796777	0.494593	27.5548	.	173.387	7.89666	151.924	8.68394	.	14.9567	0.68118		11.82	0.675628		12.3133	0.446868
chrX	WBGene00003407	mrp-1	-1	576319	593307	14923	8.3692	14.4143	1.72231	5.40885e-16	8.43162	.	19.9103	2.37899	36.0789	2.50299	.	12.6267	1.50871		26.4367	1.83405		24.2467	2.87568
chrX	WBGene00003410	mrp-4	1	9882417	9889646	6376	1.79901	3.18546	1.77067	1.38901e-05	1.99765	.	5.42333	3.01462	11.9933	3.76502	.	3.28333	1.82508		4.62667	1.45243		2.77333	1.3883
chrX	WBGene00003411	mrp-5	-1	14938182	14946751	7619	15.427	22.9888	1.49016	4.23929e-10	16.7173	.	58.3193	3.78033	71.9091	3.12801	.	12.5233	0.811779		24.0233	1.045		13.4133	0.802363
chrIV	WBGene00003421	msh-5	1	13154514	13164028	8147	1.07088	1.00516	0.938621	0.75449	0.921075	.	4.61301	4.30766	6.05822	6.02715	.	1.87667	1.75244		0.243333	0.242085		0.48	0.52113
chrI	WBGene00003475	mtm-1	1	5134696	5137977	2632	13.6562	12.2054	0.893762	0.746068	12.6695	.	83.3571	6.104	74.4211	6.09741	.	13.9433	1.02103		15.4567	1.26638		26.9133	2.12427
chrIII	WBGene00003476	mtm-3	-1	3789964	3801322	10115	54.1356	72.4473	1.33826	6.54058e-09	72.1074	.	142.367	2.62981	404.908	5.589	.	25.26	0.466606		46.0167	0.635174		17.8667	0.247778
chrX	WBGene00003477	mtm-5	-1	5234637	5244162	8923	14.3285	20.4432	1.42675	1.03919e-08	13.5276	.	92.9233	6.4852	125.973	6.1621	.	14.5967	1.01871		16.77	0.82032		12.18	0.90038
chrIII	WBGene00003478	mtm-6	1	13346862	13356266	7746	10.9351	8.66699	0.792587	0.388683	13.5235	.	24.3947	2.23087	7.80263	0.90027	.	50.3082	4.60063		33.8185	3.90199		48.0479	3.55292
chrII	WBGene00003480	klf-3	1	6617939	6622138	3599	13.1891	12.1591	0.921904	0.731474	9.596	.	33.2708	2.5226	29.6767	2.4407	.	8.56	0.649022		11.0133	0.905771		5.06667	0.527998
chrIII	WBGene00003482	mua-3	1	10160521	10183440	21908	10.8114	7.42829	0.687081	0.328772	9.04323	.	30.5967	2.83005	20.8167	2.80235	.	4.78333	0.442435		4.22667	0.568996		4.22667	0.467385
chrX	WBGene00003495	mup-2	-1	6408427	6410311	1254	16.742	33.6511	2.00998	1.956e-13	21.2911	.	92.5433	5.52761	211.423	6.2828	.	19.0333	1.13686		38.35	1.13964		16.81	0.789533
chrI	WBGene00003499	mut-2	-1	6356619	6358545	1326	4.16176	1.90196	0.457008	0.0188418	3.0264	.	19.5467	4.69673	8.03	4.22196	.	1.97333	0.474158		0.796667	0.418866		0.12	0.0396511
chrI	WBGene00003508	mut-16	1	10079695	10086280	5964	12.6615	8.38548	0.662283	0.0101916	14.6066	.	32.97	2.60396	23.2591	2.77374	.	4.92667	0.389107		4.40667	0.525512		3.50667	0.240073
chrX	WBGene00003511	mxl-3	-1	13349571	13350893	722	39.5831	58.3615	1.4744	2.39476e-06	52.2729	.	96.93	2.44877	175.743	3.01129	.	23.6533	0.597561		44.2667	0.758491		24.54	0.46946
chrX	WBGene00003514	myo-2	1	12467998	12475273	6111	2.49174	5.63345	2.26085	9.94705e-13	2.68663	.	12.0333	4.8293	28.0168	4.97329	.	1.32	0.529751		3.32667	0.590521		1.08667	0.404472
chrV	WBGene00003515	myo-3	-1	12226797	12234758	6860	20.0137	17.1965	0.859236	0.966283	19.9969	.	103.05	5.14897	88.77	5.1621	.	8.01333	0.400392		8.54667	0.497		7.59333	0.379725
chrI	WBGene00003516	nab-1	1	4225109	4236040	10288	36.0351	27.3182	0.758099	0.187846	31.0251	.	178.833	4.96275	125.173	4.58205	.	16.2767	0.451689		15.6367	0.57239		7.58667	0.244533
chrX	WBGene00003517	nac-1	1	14894537	14898372	3133	2.58905	6.4443	2.48906	2.78116e-10	2.24609	.	10.05	3.88173	22.9067	3.55456	.	14.2649	5.50971		22.6119	3.50883		11.8657	5.28281
chrIII	WBGene00003519	nac-3	1	10151950	10157829	5234	5.69526	8.53305	1.49827	4.31174e-06	7.61444	.	12.2171	2.14513	12.6974	1.48802	.	2.87333	0.504513		4.43333	0.519548		1.44667	0.18999
chrIII	WBGene00003559	ncl-1	1	7730595	7737641	6446	107.87	105.696	0.979838	0.106161	112.69	.	213.297	1.97734	283.068	2.67814	.	74.527	0.690894		78.1689	0.739566		88.7264	0.787348
chrI	WBGene00003564	ncs-2	-1	10033532	10037547	3408	45.2525	31.5951	0.698195	0.0231601	36.7707	.	193.003	4.26503	120.573	3.81621	.	29.25	0.646373		23.6633	0.748956		21.3533	0.580716
chrV	WBGene00003567	ncx-2	1	5302886	5311230	7696	9.88046	8.7055	0.881082	0.800524	9.24402	.	30.4233	3.07914	19.4533	2.2346	.	10.7774	1.09078		11.9795	1.37608		7.30822	0.790589
chrIV	WBGene00003568	ncx-3	1	10714833	10721735	6294	18.302	11.6014	0.633891	0.0010447	16.0037	.	55.04	3.00733	72.18	6.22164	.	10.61	0.57972		7.27	0.626646		10.6333	0.664432
chrIV	WBGene00003576	ndc-80	1	10085919	10088413	1894	13.7806	7.95935	0.577575	0.00615734	13.518	.	60.0733	4.35926	33.5133	4.21056	.	1.88333	0.136665		1.28333	0.161236		2.42	0.179021
chrIII	WBGene00003577	ndg-4	-1	4462799	4468748	5310	5.43202	4.0146	0.739062	0.241284	4.88041	.	17.5633	3.2333	23.21	5.7814	.	3.17333	0.584191		3.6	0.896728		7.74667	1.5873
chrI	WBGene00003578	ndx-1	1	12678769	12681805	2299	11.7258	6.69987	0.571381	0.00355002	10.5363	.	61.7267	5.2642	39.3233	5.86927	.	7.52333	0.641608		2.81667	0.420406		4.7	0.446076
chrIII	WBGene00003589	nex-2	-1	10325542	10331101	4441	8.90757	11.6062	1.30296	8.69735e-05	9.66944	.	69.2269	7.7717	114.11	9.83184	.	29.1233	3.26951		15.13	1.30362		23.3867	2.41862
chrII	WBGene00003592	nfi-1	1	7537808	7542957	4507	21.9487	14.9866	0.682799	0.0162611	21.8269	.	31.99	1.45749	43.1667	2.88036	.	11.2233	0.511343		11.7333	0.782923		11.82	0.541533
chrIII	WBGene00003593	nfm-1	1	6159440	6164521	4475	5.88693	4.80883	0.816865	0.681399	5.5781	.	63.4667	10.7809	71.7467	14.9198	.	1.48333	0.251971		3.33333	0.69317		1.56667	0.28086
chrIV	WBGene00003595	ngn-1	-1	2626130	2628256	1398	14.3158	9.19242	0.642117	0.455858	11.2482	.	56.2407	3.92858	54.015	5.87604	.	7.84667	0.548112		11.3	1.22927		4.94667	0.439774
chrIII	WBGene00003597	nhl-1	-1	9147312	9153830	5918	15.8886	15.499	0.975481	0.208138	14.4637	.	93.5946	5.89069	96.2899	6.21266	.	7.56	0.475814		7.16	0.461966		7.00667	0.484432
chrIII	WBGene00003598	nhl-2	-1	4894611	4899796	4584	45.4422	52.7797	1.16147	0.000256422	46.1715	.	181.36	3.991	285.433	5.40802	.	51.3367	1.12971		50.7733	0.961987		44.3933	0.961488
chrII	WBGene00003599	nhl-3	-1	595203	604206	8004	12.5292	12.5161	0.998948	0.120131	14.2175	.	83.0476	6.62831	178.983	14.3003	.	1.5102	0.120534		1.41497	0.113052		3.08163	0.21675
chrX	WBGene00003600	nhr-1	1	17513684	17527484	12164	25.5561	37.1419	1.45335	3.11542e-11	22.9027	.	203.122	7.94805	518.639	13.9637	.	10.6833	0.418034		13.5367	0.364458		11.3333	0.494846
chrI	WBGene00003601	nhr-2	-1	5818482	5821258	2168	19.6142	17.3909	0.886651	0.820809	18.1499	.	95.4933	4.86859	52.43	3.01479	.	3.88333	0.197986		4.19667	0.241314		6.40667	0.352986
chrX	WBGene00003602	nhr-3	1	14557564	14561357	3193	50.3718	90.121	1.78912	3.79676e-19	44.5996	.	120.053	2.38335	209.557	2.32528	.	6.66667	0.132349		18.64	0.206833		7.72667	0.173245
chrIV	WBGene00003607	nhr-8	1	7711132	7714670	2905	17.2205	25.854	1.50135	0.000863391	12.7487	.	42.7233	2.48096	54.0633	2.0911	.	21.8667	1.26981		11.53	0.445965		13.36	1.04795
chrIII	WBGene00003609	nhr-10	-1	7112238	7116697	3838	25.3431	21.0365	0.830066	0.703023	21.2507	.	67.7867	2.67475	49.9267	2.37334	.	12.2067	0.481656		18.26	0.868016		12.0933	0.569081
chrIV	WBGene00003610	nhr-11	1	9069649	9073592	3343	33.1837	23.1825	0.698611	0.0262055	22.0595	.	140.522	4.23469	88.0393	3.79767	.	10.87	0.327571		12.18	0.525397		13.9467	0.632229
chrV	WBGene00003611	nhr-12	-1	10082116	10084146	1416	15.678	15.7232	1.00288	0.271959	12.1271	.	39.2867	2.50585	27.25	1.73311	.	3.14	0.200281		3.96	0.251858		1.32667	0.109397
chrV	WBGene00003612	nhr-13	1	2192385	2196825	2397	7.84793	6.52545	0.831486	0.790556	8.25073	.	29.1222	3.71081	34.2389	5.24698	.	2.28	0.290522		0.486667	0.0745798		3.62667	0.439557
chrX	WBGene00003613	nhr-14	-1	8473670	8477426	3156	28.2974	29.8582	1.05516	0.0302585	26.3973	.	47.58	1.68143	53.6567	1.79705	.	6.04	0.213447		6.55667	0.219593		6.88667	0.260885
chrIII	WBGene00003619	nhr-20	-1	4230407	4237683	6667	18.5355	18.5366	1.00006	0.100184	20.3078	.	116.837	6.30338	77.4833	4.18002	.	9.21667	0.497243		8.07667	0.435715		3.85333	0.189747
chrII	WBGene00003620	nhr-21	1	7337805	7349433	11013	18.8416	10.8115	0.573811	2.10188e-06	16.2821	.	63.7687	3.38446	48.8937	4.52237	.	8.61667	0.45732		5.97333	0.552496		12.08	0.74192
chrII	WBGene00003621	nhr-22	-1	6446113	6449774	3024	18.171	16.0764	0.884729	0.802376	19.1548	.	113.007	6.21908	122.92	7.646	.	9.08	0.499698		6.59	0.409918		12.0867	0.631001
chrI	WBGene00003622	nhr-23	1	7214944	7221346	5782	28.5618	24.2848	0.850255	0.929342	28.5292	.	47.7533	1.67193	48.84	2.01113	.	3.40667	0.119273		7.95667	0.327639		9.40667	0.32972
chrX	WBGene00003624	nhr-28	1	16349177	16359582	8692	11.9462	19.6464	1.64458	9.34966e-14	10.7426	.	72.99	6.10991	97.0133	4.93797	.	4.69333	0.392874		8.68	0.441811		7.59333	0.706841
chrIV	WBGene00003625	nhr-31	-1	8022844	8036411	12965	15.0899	15.5972	1.03362	0.27755	9.52009	.	88.95	5.89469	92.3467	5.92073	.	5.9	0.390991		8.58	0.550099		6.38	0.670162
chrX	WBGene00003626	nhr-32	1	13251694	13256152	3675	9.04463	11.219	1.24041	0.00175175	10.0541	.	30.2267	3.34195	48.8	4.34975	.	11.1867	1.23683		10.7867	0.96146		9.90667	0.985331
chrX	WBGene00003628	nhr-35	1	4532307	4537506	4555	14.3074	30.6632	2.14318	2.09461e-22	14.7488	.	56.3	3.93504	200.51	6.5391	.	5.25333	0.367177		12.7633	0.416242		4.94	0.334941
chrX	WBGene00003630	nhr-40	1	2591808	2606724	13584	15.8994	28.3943	1.78587	1.52285e-19	14.1009	.	114.44	7.19775	297.117	10.464	.	13.7133	0.862506		33.66	1.18545		16.8867	1.19756
chrIV	WBGene00003633	nhr-43	1	11899365	11902888	2910	28.3241	13.8266	0.488159	3.2301e-08	21.4746	.	71.64	2.5293	32.43	2.34547	.	11.6367	0.41084		9.76	0.705884		6.4	0.298027
chrV	WBGene00003634	nhr-44	-1	8961880	8964185	1705	16.8252	14.683	0.872678	0.989101	13.8856	.	28.7433	1.70835	24.3933	1.66133	.	11.6	0.689441		10.0967	0.687644		7.12	0.51276
chrV	WBGene00003637	nhr-47	1	5505296	5509940	3917	22.6681	17.543	0.773907	0.289737	25.9258	.	62.5067	2.75747	53.1633	3.03046	.	8.31	0.366594		9.34	0.532406		11.7267	0.452316
chrX	WBGene00003638	nhr-48	1	15707698	15716345	7173	15.641	19.1606	1.22502	8.00492e-05	16.8132	.	87.3867	5.58702	108.147	5.64422	.	5.18667	0.331607		5.52667	0.288439		7.73333	0.459956
chrI	WBGene00003639	nhr-49	1	9869390	9874667	4582	66.0088	59.5686	0.902434	0.558605	60.2289	.	170.104	2.57699	169.721	2.84917	.	60.6871	0.919378		51.7177	0.868203		77.6905	1.28992
chrV	WBGene00003640	nhr-50	-1	15997759	16000586	2226	7.36186	6.28392	0.853577	0.985147	5.85175	.	38.7167	5.25909	44.9889	7.15937	.	1.22	0.165719		0.796667	0.126779		2.42	0.413551
chrV	WBGene00003646	nhr-56	1	2219123	2221299	1449	14.7812	17.5897	1.19	0.00822883	11.7654	.	46.5503	3.14929	49.3725	2.80689	.	4.6129	0.312078		7.46371	0.424322		2.62903	0.223455
chrV	WBGene00003647	nhr-57	1	4131726	4134930	2368	35.2291	36.7261	1.04249	0.259639	29.758	.	135.232	3.83863	174.094	4.74033	.	3.99667	0.113448		4.83	0.131514		2.17333	0.0730335
chrV	WBGene00003648	nhr-58	1	532322	534048	1104	21.6549	10.6064	0.489794	0.0465274	17.8043	.	265.213	12.2473	79.37	7.4832	.	4.99	0.230433		4.69	0.442185		1.92667	0.108213
chrI	WBGene00003652	nhr-62	1	9839626	9844801	4547	39.3795	40.0939	1.01814	0.30711	30.6013	.	130.7	3.31899	89.0446	2.2209	.	16.5833	0.421116		25.5	0.636007		12.64	0.413055
chrI	WBGene00003654	nhr-64	1	3101959	3109544	6287	7.65898	7.73493	1.00992	0.149193	10.2302	.	60.5567	7.90662	74.4933	9.63077	.	5.41	0.70636		3.2	0.413708		3.85333	0.376664
chrIV	WBGene00003656	nhr-66	-1	8226327	8241410	14409	26.6227	13.3742	0.502362	8.48641e-06	18.4061	.	137.376	5.1601	103.663	7.75097	.	9.65333	0.362598		5.87333	0.439153		8.44	0.458543
chrIV	WBGene00003657	nhr-67	1	11169715	11174764	4431	7.17434	6.3181	0.880652	0.896158	5.81517	.	53.9067	7.51382	45.8633	7.25904	.	2.29	0.319193		2.68	0.424178		2.9	0.498696
chrV	WBGene00003658	nhr-68	1	11573100	11575851	2111	11.4884	6.2172	0.541172	0.0341653	10.81	.	46.24	4.02493	24.3133	3.91066	.	2.59333	0.225735		0.9	0.14476		5.31333	0.491518
chrX	WBGene00003661	nhr-71	1	13743594	13751709	7507	11.9764	20.6244	1.72208	2.89412e-14	12.7609	.	71.1633	5.94195	86.55	4.1965	.	7.87333	0.657403		10.35	0.501834		2.64667	0.207405
chrV	WBGene00003674	nhr-84	-1	15876713	15881006	3685	7.02836	4.84383	0.689183	0.393722	5.97096	.	47.7133	6.78869	30.3467	6.26502	.	2.58667	0.368033		1.04	0.214706		0.84	0.140681
chrV	WBGene00003676	nhr-86	-1	2061110	2066929	3483	17.0144	16.4492	0.966783	0.213032	21.1602	.	80.7163	4.74401	124.982	7.59805	.	8.26	0.485472		12.44	0.756269		7.24667	0.342467
chrIV	WBGene00003677	nhr-87	1	1624017	1626702	1850	7.96135	6.74405	0.847099	0.88378	9.03351	.	23.4667	2.94757	43.9433	6.51586	.	3.52574	0.442856		3.62868	0.538056		2.26471	0.2507
chrX	WBGene00003681	nhr-91	1	15307946	15314830	6071	11.3457	14.5839	1.28542	4.90997e-05	11.2146	.	94.1667	8.2998	139.02	9.53241	.	6.75667	0.595529		12.58	0.862594		10.1267	0.902987
chrIV	WBGene00003687	nhr-97	1	9757348	9764467	6508	11.0872	11.9104	1.07425	0.0280943	9.74447	.	33.0033	2.97671	40.96	3.43901	.	3.86333	0.34845		4.09333	0.343677		2.41333	0.247662
chrV	WBGene00003688	nhr-98	1	454420	456773	1556	9.27667	6.9428	0.748415	0.377159	5.33033	.	41.3667	4.45921	31.77	4.57596	.	3.69333	0.398131		0.936667	0.134912		2.41333	0.452755
chrIV	WBGene00003694	nhr-104	-1	4784467	4788485	3271	9.0911	6.66524	0.733161	0.370502	8.63406	.	22.388	2.46263	18.144	2.72218	.	4.21333	0.463457		1.97667	0.296563		1.56667	0.181452
chrIV	WBGene00003695	nhr-105	1	7048094	7053424	4700	13.3051	9.8866	0.743068	0.162199	11.8204	.	57.0968	4.29134	37.9409	3.83761	.	12.4067	0.932474		10.8967	1.10217		7.59333	0.642391
chrV	WBGene00003704	nhr-114	1	4186813	4189992	2056	17.8609	13.4049	0.750517	0.291573	19.2641	.	62.3467	3.49068	39.0133	2.91038	.	34.36	1.92376		34.7333	2.59109	Y	22.5867	1.17247
chrII	WBGene00003709	nhr-119	-1	2794943	2800895	5102	11.2479	8.28283	0.736386	0.147635	12.1272	.	71.151	6.32569	57.4	6.93	.	2.2381	0.198978		1.45238	0.175348		3.08163	0.254109
chrV	WBGene00003717	nhr-127	1	16261094	16263871	2103	5.20328	2.7223	0.523189	0.385122	3.96671	.	55.4635	10.6593	40.7044	14.9522	.	3.76	0.722621		1.07667	0.395499		2.16	0.544531
chrV	WBGene00003725	nhr-135	-1	7091697	7093950	1653	10.7102	14.1573	1.32185	0.0020816	13.1851	.	31.1067	2.90439	54.04	3.81711	.	4.18667	0.390904		4.90333	0.346347		4.94667	0.37517
chrV	WBGene00003726	nhr-136	1	12107138	12109118	1372	10.1163	6.85933	0.67805	0.167864	7.55394	.	32.1733	3.18036	36.9567	5.3878	.	6.51667	0.644178		2.85333	0.415978		4.11333	0.544528
chrX	WBGene00003727	nhr-137	-1	6661755	6668966	6523	13.7122	15.5955	1.13734	0.123155	14.8192	.	38.4233	2.80212	49.6688	3.18481	.	4.37333	0.318936		5.96333	0.382375		4.71333	0.318056
chrIV	WBGene00003728	nhr-138	1	9718539	9728549	9332	14.5251	12.0123	0.827003	0.677219	11.3205	.	94.5533	6.50964	67.42	5.61257	.	8.18667	0.563621		10.6967	0.890474		4.95333	0.437554
chrX	WBGene00003733	nhx-5	1	10577013	10580992	3379	10.5475	22.8664	2.16794	1.60022e-10	9.74904	.	31.4533	2.98207	85.9533	3.75894	.	7.34667	0.696532		25.6533	1.12188		14.1333	1.44972
chrI	WBGene00003735	nhx-8	1	12825674	12834133	6844	9.06495	8.64801	0.954006	0.313744	9.94353	.	77.3938	8.5377	55.5959	6.42875	.	158.133	17.4445		213.89	24.7328		123.4	12.4101
chrV	WBGene00003738	nid-1	1	12909024	12917205	7574	19.2208	12.9773	0.675168	0.00620114	17.4846	.	97.0333	5.04834	99.0767	7.63462	.	15.2533	0.793584		16.2267	1.25039		11.8333	0.676788
chrX	WBGene00003744	nlp-6	1	17662271	17665281	2334	1.32069	2.42481	1.83601	0.0052618	0.982434	.	2.66071	2.01463	5.38333	2.22011	.	1.17333	0.888422		2.22667	0.918286		0.36	0.366437
chrIII	WBGene00003759	nlp-21	-1	11388530	11393159	3875	0.446323	0.660645	1.4802	0.159905	0.349419	.	4.98667	11.1728	7.54333	11.4181	.	0.413333	0.926087		1.14333	1.73063		0.846667	2.42307
chrX	WBGene00003776	nmy-1	1	2904371	2918027	12803	26.877	37.3559	1.38988	1.12271e-09	26.0643	.	285.024	10.6048	445.353	11.9219	.	26.8167	0.997756		28.27	0.756775		25.22	0.967606
chrII	WBGene00003785	nos-3	1	9746254	9749913	3059	21.7846	21.6603	0.994298	0.143505	24.8846	.	100.343	4.60617	137.727	6.35847	.	9.35333	0.429356		8.54	0.394269		6.39333	0.256919
chrIV	WBGene00003787	npp-1	1	9858348	9862098	3145	17.5169	12.038	0.687224	0.0445888	16.3412	.	76.9533	4.3931	57.9233	4.81171	.	8.89333	0.507702		6.15	0.510882		9.42667	0.576866
chrII	WBGene00003789	npp-3	-1	11865460	11874736	8306	12.3044	11.4577	0.931189	0.405854	12.9556	.	91.1964	7.41172	78.36	6.83908	.	6.61667	0.53775		4.13333	0.360748		3.01333	0.23259
chrI	WBGene00003793	npp-7	1	5691840	5697453	5013	38.032	35.3676	0.929944	0.354992	43.2421	.	116.623	3.06645	153.997	4.35417	.	5.24667	0.137954		6.24667	0.176621		4.22	0.0975901
chrIV	WBGene00003794	npp-8	-1	1567896	1595937	16452	10.8598	10.7379	0.988778	0.16115	8.85467	.	25.8368	2.37912	63.7767	5.93938	.	2.86	0.263356		3.53333	0.329051		4.96	0.560157
chrIII	WBGene00003795	npp-9	-1	3400630	3404558	3289	11.5327	7.02083	0.608776	0.318505	10.124	.	32.2567	2.79698	17.3467	2.47074	.	6.56333	0.569107		4.87	0.69365		9.30667	0.919263
chrIII	WBGene00003796	npp-10	-1	6013446	6019833	5787	17.0128	12.4184	0.729942	0.450768	18.4761	.	28.1118	1.65239	38.891	3.13174	.	7.90333	0.464553		8.84667	0.712387		8.21333	0.444539
chrI	WBGene00003797	npp-11	1	3817956	3821506	2927	10.9921	6.35958	0.578557	0.0224874	10.1367	.	69.32	6.30632	27.2833	4.29011	.	8.84333	0.804514		5.53	0.869554		10.16	1.0023
chrI	WBGene00003798	npp-12	1	6447137	6453951	4461	12.6594	9.31092	0.735495	0.17315	13.4548	.	54.29	4.28852	23.04	2.47451	.	2.88333	0.227763		2.25	0.241652		7.5	0.557421
chrI	WBGene00003800	npp-14	-1	9660166	9665145	4379	15.0528	9.56954	0.635733	0.0216349	14.9717	.	70.6733	4.69504	48.4333	5.0612	.	2.48667	0.165197		3.23333	0.337878		4.95333	0.330847
chrIII	WBGene00003802	npp-16	1	11915813	11917770	1338	7.8068	4.75112	0.608587	0.0798821	8.63154	.	52.6136	6.73946	41.7784	8.79338	.	4.79	0.613568		2.95	0.620906		6.28667	0.728337
chrIII	WBGene00003804	npp-18	1	13296422	13299017	1858	13.5883	9.79871	0.721115	0.226255	15.4795	.	143.647	10.5714	95.9667	9.79381	.	3.33962	0.245773		5.01415	0.511716		6.5	0.419909
chrII	WBGene00003805	npp-19	-1	10796527	10798556	1419	9.31712	5.78717	0.621133	0.0561024	9.56025	.	59.11	6.34423	41.2433	7.12668	.	1.96667	0.211081		0.9	0.155516		1.81333	0.189674
chrIV	WBGene00003806	npp-20	-1	1490655	1496072	3931	12.8518	8.76367	0.681901	0.169857	12.5191	.	54.5084	4.2413	57.2143	6.52857	.	13.5345	1.05312		8.16897	0.932139		9.24138	0.738184
chrV	WBGene00003812	nrf-5	1	13828137	13831026	2289	5.3519	3.28419	0.613648	0.0873858	3.95413	.	20.04	3.74446	6.94792	2.11557	.	5.13333	0.959161		3.26	0.992636		4.22	1.06724
chrI	WBGene00003815	nars-1	-1	7088021	7090262	1641	12.9555	6.70384	0.517451	0.00216501	11.9848	.	92.5933	7.14702	61.1567	9.12263	.	2.89597	0.223532		3.46644	0.517083		5.59732	0.467036
chrII	WBGene00003821	nst-1	-1	8280805	8283324	1919	22.4898	16.7001	0.742562	0.204615	23.1001	.	213.375	9.48762	158.682	9.50188	.	4.78	0.21254		4.33667	0.259679		2.41333	0.104473
chrII	WBGene00003822	nsy-1	1	5017498	5029974	11805	17.5972	12.3082	0.699442	0.0136021	18.4008	.	84.17	4.78315	67.3467	5.47168	.	9.14667	0.51978		6.76667	0.549768		6.52	0.354333
chrII	WBGene00003825	ntl-2	-1	4372744	4376702	3239	61.3543	79.6922	1.29889	4.02441e-07	56.7652	.	268.003	4.36813	367.899	4.6165	.	24.3167	0.396332		33.01	0.414219		23.3267	0.410932
chrIII	WBGene00003826	ntl-3	-1	11831285	11847699	12234	18.0027	17.0463	0.946875	0.333881	22.3589	.	225.427	12.5218	323.357	18.9693	.	13.3367	0.740815		17.8667	1.04813		17.1333	0.766288
chrIV	WBGene00003827	ntl-4	1	7909695	7914283	3962	60.0565	56.4654	0.940204	0.251823	52.5665	.	112.08	1.86624	144.057	2.55124	.	27.4933	0.457791		36.87	0.652966		27.42	0.521625
chrX	WBGene00003843	39722	1	11345187	11350182	4279	3.21045	3.7226	1.15953	0.0668197	1.94415	.	9.31579	2.90171	22.0197	5.91515	.	2.93667	0.914722		4.79333	1.28763		1.80667	0.929286
chrV	WBGene00003844	odc-1	-1	6898523	6900396	1273	50.031	50.3386	1.00615	0.211864	53.9364	.	119.56	2.38972	143.963	2.8599	.	29.45	0.588635		42.13	0.836933		27.3333	0.50677
chrI	WBGene00003847	blmp-1	1	10404024	10413837	9095	35.5835	28.5511	0.802368	0.353779	30.8199	.	141.563	3.97834	208.856	7.31516	.	6.34667	0.17836		3.01667	0.105659		4.94667	0.160502
chrIII	WBGene00003858	ogt-1	-1	7145754	7153847	6104	32.996	29.5256	0.894825	0.684785	33.3682	.	98.9267	2.99814	116.763	3.95464	.	25.848	0.783367		19.7128	0.667652		18.3311	0.549358
chrII	WBGene00003868	ooc-3	-1	11493167	11495468	1635	9.5208	4.32324	0.454084	0.000940319	8.97064	.	59.9733	6.29919	25.7846	5.96419	.	2.36	0.247878		2.08667	0.482663		2.9	0.323277
chrX	WBGene00003883	osm-1	1	16541321	16551140	8699	3.59714	6.67651	1.85606	1.85321e-11	3.65272	.	20.7451	5.76711	54.75	8.20039	.	1.89667	0.527271		1.81333	0.271599		3.14	0.859634
chrX	WBGene00003885	osm-5	1	2984251	2991440	6029	4.13062	8.57306	2.07549	6.43436e-14	3.46293	.	11.5064	2.78564	36.3487	4.23987	.	4.27	1.03374		12.0467	1.40518		3.74	1.08001
chrX	WBGene00003891	osm-11	-1	17420142	17421392	650	2.36154	7.47385	3.16482	1.731e-05	1.86308	.	6.42667	2.72139	19.49	2.60776	.	1.56667	0.663409		6.90667	0.924111		1.2	0.644096
chrIII	WBGene00003892	osm-12	-1	12190955	12202400	8144	4.09707	4.97207	1.21357	0.0023873	4.35118	.	27.7303	6.76832	35.2368	7.08696	.	3.08667	0.753385		3.58	0.720023		0.48	0.110315
chrIV	WBGene00003893	ost-1	1	1107434	1110860	2774	66.7269	73.2058	1.0971	0.118086	76.4326	.	355.794	5.33209	569.031	7.77303	.	41.9467	0.628632		66.3667	0.906576		33.4233	0.437292
chrIII	WBGene00003901	paa-1	1	5450154	5453099	2345	32.9557	22.9783	0.697248	0.332113	35.4171	.	261.2	7.9258	161.333	7.02113	.	24.6267	0.747267		21.8467	0.950754		37.5533	1.06032
chrI	WBGene00003902	pab-1	-1	10432806	10435811	2376	45.2992	36.9423	0.815518	0.583151	50.6669	.	135.76	2.99696	169.023	4.57533	.	10.7467	0.237237		9.83333	0.266181		17.4	0.34342
chrX	WBGene00003903	pab-2	-1	13522779	13527321	3939	56.5595	115.419	2.04066	1.30021e-27	71.803	.	114.303	2.02094	390.77	3.38566	.	23.1933	0.410069		72.59	0.628926		167.37	2.33096
chrI	WBGene00003904	pabp-2	-1	9420899	9422300	801	22.1898	19.9444	0.898813	0.716602	27.4332	.	198.607	8.95037	124.627	6.24869	.	16.5767	0.747041		10.7833	0.540669		13.18	0.48044
chrI	WBGene00003905	pad-1	1	12877259	12902794	21298	15.0427	22.2037	1.47605	3.60365e-12	15.4639	.	109.047	7.24915	150.64	6.78445	.	8.58667	0.57082		10.86	0.489108		9.3	0.6014
chrX	WBGene00003907	paf-2	-1	4291449	4295148	2813	7.68912	18.8406	2.45029	2.19776e-19	10.069	.	28.6567	3.72691	150.093	7.9665	.	6.75	0.877864		8.34	0.442662		10.16	1.00904
chrX	WBGene00003911	pak-1	-1	6044274	6052857	7862	23.9289	35.9183	1.50104	1.71182e-11	25.9004	.	142.093	5.93815	332.62	9.26047	.	4.06333	0.169809		5.66	0.15758		6.76667	0.261257
chrIII	WBGene00003915	pan-1	1	4560723	4566248	4782	59.8588	66.0533	1.10348	0.00148129	56.3909	.	128.81	2.1519	158.73	2.40306	.	36.4467	0.608877		43.3567	0.656389		36.4333	0.646085
chrIV	WBGene00003920	par-5	-1	11820482	11822580	1401	86.5089	90.5332	1.04652	0.0197878	106.367	.	397.133	4.59066	442.21	4.88451	.	22.1467	0.256004		19.89	0.219698		18.36	0.17261
chrI	WBGene00003925	pas-4	-1	8727208	8728540	732	19.0478	11.7958	0.619271	0.0388945	18.3866	.	41.1167	2.1586	26.72	2.26522	.	6.67	0.350171		7.36667	0.624518		4.82667	0.26251
chrV	WBGene00003927	pas-6	-1	5583189	5584508	719	20.3401	14.2768	0.701904	0.208853	21.3533	.	93.48	4.59586	73.5533	5.15196	.	4.83	0.237462		5.65667	0.396215		7.25333	0.339683
chrII	WBGene00003928	pas-7	-1	10098719	10099964	645	23.1961	12.5829	0.542459	0.00328384	26.0434	.	158.28	6.82355	114.11	9.06862	.	6.13	0.264268		6.34667	0.504386		5.91333	0.227057
chrIII	WBGene00003929	pat-2	1	8815943	8825189	8598	19.2826	15.0409	0.780023	0.240499	17.1695	.	121.599	6.30613	104.322	6.93592	.	6.58667	0.341586		5.32	0.353703		6.02667	0.351011
chrIII	WBGene00003930	pat-3	-1	3908895	3915793	6206	29.6915	20.9878	0.706863	0.0217961	25.8853	.	200.723	6.76029	117.07	5.57799	.	14.4467	0.486559		12.8733	0.613371		8.79333	0.339704
chrIV	WBGene00003932	pat-6	-1	261883	264494	1874	41.9378	26.7713	0.638358	0.00231772	34.1644	.	253.077	6.03457	147.98	5.52755	.	13.6633	0.3258		7.07333	0.264213		12.3333	0.361
chrI	WBGene00003934	pat-10	-1	5018770	5020080	710	66.8289	34.6838	0.518994	0.1073	43.6113	.	254.257	3.80459	118.897	3.42802	.	31.8567	0.47669		42.8133	1.23439		19.28	0.442088
chrI	WBGene00003950	pbs-4	1	3908656	3909926	670	18.5381	10.9209	0.589107	0.0204143	17.9104	.	130.26	7.02663	112.69	10.3188	.	5.24497	0.28293		3.65436	0.334621		5.95302	0.332377
chrI	WBGene00003953	pbs-7	-1	8695197	8696376	579	12.0095	9.66494	0.804775	0.786711	17.5026	.	42.6733	3.5533	26.45	2.7367	.	6.08667	0.506821		10.3133	1.06709		7.48667	0.427746
chrIV	WBGene00003955	pcn-1	-1	4047922	4049616	1090	11.8436	9.38211	0.792169	0.595774	12.9495	.	52.7733	4.45586	44.4698	4.73985	.	23.0633	1.94733		9.01333	0.960694		30.6933	2.37023
chrII	WBGene00003960	pcs-1	-1	11574874	11578446	2899	5.93946	2.51518	0.423469	0.000132414	3.81683	.	11.8167	1.98952	6.74	2.67973	.	2.60667	0.438873		2.15333	0.856136		3.98667	1.0445
chrIV	WBGene00003961	pct-1	1	8170578	8188865	17633	27.5829	19.398	0.703261	0.00858092	19.9542	.	186.803	6.77243	214.047	11.0345	.	6.35	0.230215		5.55667	0.286456		8.34	0.417956
chrIII	WBGene00003962	pdi-1	-1	3699701	3701639	1323	44.2302	37.325	0.843882	0.890752	54.0752	.	180.877	4.08944	145.68	3.90301	.	38.0967	0.861328		30.9567	0.829381		31.1533	0.576111
chrX	WBGene00003963	pdi-2	1	4524193	4526508	1686	120.869	247.044	2.0439	5.21825e-28	176.778	.	408.783	3.38204	983.603	3.98149	.	122.157	1.01065		289.79	1.17303		160.387	0.907278
chrX	WBGene00003965	pdk-1	1	1320077	1327980	7124	8.23428	19.4995	2.36809	8.60804e-27	8.41536	.	35.0467	4.25619	101.743	5.21774	.	6.67667	0.810838		10.9	0.558988		2.89333	0.343816
chrII	WBGene00003966	pdl-1	1	7182932	7185118	1585	17.8372	15.9287	0.893004	0.867864	17.1457	.	23.4967	1.31728	40.9467	2.57062	.	6.55333	0.367396		5.34333	0.335453		8.33333	0.486029
chrX	WBGene00003968	peb-1	1	2212531	2218973	5841	24.5516	26.2702	1.07	0.0110715	26.9634	.	54.77	2.23081	89.22	3.39625	.	21.0467	0.857242		29.0533	1.10594		20.7333	0.768945
chrX	WBGene00003970	pek-1	-1	11410117	11414896	4179	17.6529	41.7428	2.36464	4.94492e-29	25.2123	.	51.05	2.89187	138.743	3.32377	.	8.53333	0.483395		21.2567	0.50923		10.0133	0.397161
chrIII	WBGene00003978	pes-4	-1	1215968	1228684	11368	22.1771	20.1357	0.907953	0.556811	21.4949	.	131.607	5.93436	172.737	8.57861	.	7.56333	0.341043		4.67667	0.232257		2.89333	0.134605
chrV	WBGene00003982	pes-9	-1	14595253	14597893	2039	8.67852	7.24179	0.834449	0.856189	9.25356	.	56.828	6.54812	71.0385	9.80952	.	6.28	0.723626		3.37	0.465355		4.58667	0.495665
chrX	WBGene00003986	pes-22	-1	4921221	4932885	11034	8.54871	20.1755	2.36007	1.68074e-30	6.08274	.	61.14	7.15195	98.3289	4.87367	.	5.09	0.595411		8.82333	0.437328		4.46667	0.734318
chrI	WBGene00003989	pfn-1	1	12921157	12923535	1648	38.6056	26.9056	0.696937	0.0375402	30.7834	.	183.621	4.75633	155.634	5.78445	.	50.4167	1.30594		47.8267	1.77757		46.6533	1.51554
chrX	WBGene00003990	pfn-2	-1	5353022	5354534	912	14.6486	24.8421	1.69587	0.000466914	14.6776	.	40.5367	2.76728	96.8533	3.89876	.	27.4733	1.8755		49.7	2.00064		17.9733	1.22454
chrI	WBGene00003996	pgp-2	1	5886376	5895974	8970	5.25362	5.2519	0.999671	0.366643	5.42988	.	20.3433	3.87225	17.8	3.38925	.	2.49	0.473959		3.76333	0.716567		0.96	0.1768
chrV	WBGene00004013	pha-4	1	20749361	20760272	9844	37.4392	35.0654	0.936595	0.299687	37.928	.	108.43	2.89616	190.693	5.43822	.	11.2033	0.299241		11.2467	0.320734		9.16667	0.241686
chrII	WBGene00004015	phb-2	1	6251025	6252975	1350	31.9648	21.6722	0.678002	0.0337396	29.8215	.	226.437	7.08393	117.47	5.4203	.	51.04	1.59676		32.8233	1.51453		37.0133	1.24116
chrII	WBGene00004017	phg-1	1	10136931	10139158	1626	8.92866	8.94465	1.00179	0.33378	6.60947	.	36.0433	4.03681	36.67	4.09966	.	2.61	0.292317		4.68667	0.523963		2.89333	0.437756
chrIV	WBGene00004025	phy-2	-1	12211073	12217226	5524	66.8042	108.145	1.61884	5.35863e-16	82.5207	.	154.397	2.31118	325.61	3.01085	.	37.5333	0.561841		52.2333	0.482992		48.82	0.591609
chrII	WBGene00004034	pkc-3	1	5379889	5384154	3638	19.8399	14.888	0.750407	0.15998	17.5301	.	62.8567	3.1682	74.8733	5.02911	.	158.87	8.00761		69.02	4.63595		125.39	7.15284
chrV	WBGene00004037	plc-2	1	15192649	15197644	3827	2.89496	4.97387	1.71812	3.01926e-05	3.33708	.	26.3433	9.09973	58.8067	11.8231	.	0.993333	0.343125		0.766667	0.154139		0.48	0.143838
chrIV	WBGene00004039	plc-4	-1	7509454	7512974	2859	13.1074	7.93739	0.605567	0.00534854	12.1035	.	84.01	6.40937	83.46	10.5148	.	5.66667	0.432326		4.48333	0.564837		3.26	0.269343
chrII	WBGene00004040	pld-1	-1	5083840	5092437	7924	13.4675	12.4075	0.921291	0.477676	13.3294	.	71.7476	5.32746	96.2574	7.758	.	6.97667	0.518037		5.31	0.427967		4.95333	0.37161
chrIII	WBGene00004042	plk-1	1	8101152	8104010	2253	16.119	9.55792	0.592962	0.00310904	15.9942	.	87.4767	5.42694	42.8233	4.4804	.	7.8	0.483902		5.96667	0.624264		7.61333	0.476005
chrIV	WBGene00004046	plp-1	1	7632765	7634646	919	34.8912	27.7922	0.796538	0.49166	30.0631	.	0	0	0	0	.	5.27103	0.15107		5.89252	0.212021		1.85981	0.0618636
chrII	WBGene00004048	plx-2	-1	14417812	14425893	7467	23.5081	21.1598	0.900108	0.632813	21.2752	.	98.3014	4.1816	78.9007	3.72879	.	16.5233	0.702878		10.6233	0.502052		13.8733	0.652089
chrII	WBGene00004059	pmp-2	-1	6884005	6887696	2822	12.7551	14.4391	1.13202	0.0173681	11.079	.	43.0467	3.37485	50.83	3.52031	.	8.40667	0.659081		6.56667	0.454785		6.50667	0.587296
chrV	WBGene00004060	pmp-3	1	14646381	14653452	6463	32.0229	27.0789	0.845611	0.814733	32.0918	.	187.613	5.85872	172.187	6.3587	.	21.05	0.657342		29.8667	1.10295		18.97	0.591118
chrV	WBGene00004062	pmp-5	-1	6662174	6665784	3010	4.03389	0.925249	0.229369	1.53715e-07	2.80332	.	13.4967	3.34582	5.24	5.66334	.	2.69667	0.668503		0.45	0.486355		1.20667	0.430442
chrIII	WBGene00004075	pod-1	-1	13514849	13525327	7836	31.0457	25.1566	0.810309	0.420812	35.7617	.	233.833	7.53191	215.267	8.55707	.	31.7333	1.02215		27.79	1.10468		23.1467	0.647247
chrII	WBGene00004076	pod-2	1	1135344	1152712	15600	19.787	20.8172	1.05206	0.012304	23.5317	.	177.15	8.95286	153.893	7.39256	.	9.24	0.466973		8.15667	0.391823		7.00667	0.297755
chrI	WBGene00004077	pop-1	-1	2823470	2831457	6792	54.8324	34.5679	0.630429	0.000136109	48.9519	.	84.7137	1.54496	80.3527	2.32449	.	61.5333	1.12221		55.26	1.59859		60.3867	1.23359
chrIII	WBGene00004085	pph-4.1	-1	12344873	12351355	2627	14.421	10.5445	0.731193	0.109413	17.1317	.	132.933	9.21803	112.883	10.7054	.	5.76351	0.399661		4.89527	0.464247		5.02027	0.29304
chrIII	WBGene00004086	pph-4.2	-1	12374137	12377322	1828	7.36625	6.2459	0.847908	0.951895	12.9048	.	58.1667	7.89638	53.6967	8.59711	.	1.89333	0.257028		1.45667	0.23322		1.44667	0.112103
chrI	WBGene00004087	ppk-1	1	5358111	5365166	6270	14.2785	8.2874	0.580412	0.0109994	12.6094	.	165.268	11.5747	72.6946	8.77171	.	10.46	0.732572		3.85667	0.465365		4.56667	0.362163
chrIII	WBGene00004088	ppk-2	1	2101175	2107460	4189	25.8094	21.2846	0.824683	0.672318	24.4261	.	153.244	5.93753	145.391	6.83082	.	13.78	0.533914		8.89	0.417674		10.7333	0.43942
chrV	WBGene00004092	ppt-1	-1	6624684	6626317	1033	3.85237	3.08422	0.800603	0.818611	2.76573	.	15.9867	4.14982	12.2467	3.97075	.	0.496667	0.128925		1.25667	0.40745		0.12	0.0433882
chrV	WBGene00004104	pqn-13	-1	5669632	5676324	5969	11.3909	10.0999	0.886664	0.782355	9.1027	.	51.6167	4.53138	75.9967	7.52447	.	5.02333	0.440994		6.14333	0.608255		2.52667	0.277573
chrII	WBGene00004105	szy-20	-1	8966859	8969348	1889	25.5881	20.3666	0.795939	0.589216	24.531	.	75.2467	2.94069	45.1	2.21441	.	18.15	0.709313		15.86	0.778726		11.2333	0.457925
chrX	WBGene00004108	pqn-18	1	12903904	12920061	15516	14.4515	19.2902	1.33482	7.43704e-08	11.6325	.	100.34	6.94321	158.91	8.23784	.	6.93	0.479534		10.2	0.528765		7.71333	0.663084
chrI	WBGene00004110	pqn-20	1	6790543	6797471	6309	38.3798	31.7214	0.826512	0.695228	45.7739	.	129.847	3.38321	230.413	7.26367	.	31.0133	0.808064		37.5933	1.18511		22.5733	0.493149
chrI	WBGene00004111	pqn-21	-1	6773995	6780141	5341	17.3178	15.9529	0.921185	0.510831	18.3363	.	44.7237	2.58252	70.4145	4.41389	.	22.5067	1.29962		11.9767	0.750751		13.5333	0.738064
chrI	WBGene00004115	pqn-26	-1	8771428	8777671	5309	5.44933	4.98399	0.914606	0.660146	3.50951	.	15.54	2.85173	18.6567	3.74332	.	3.30333	0.606191		2.74333	0.550429		1.08	0.307735
chrII	WBGene00004116	pqn-27	-1	13448765	13460731	8770	22.6726	21.8081	0.961871	0.174873	28.3995	.	113.883	5.02295	156.227	7.1637	.	240.382	10.6023		94.8919	4.35122		234.436	8.25491
chrI	WBGene00004117	sin-3	1	8416373	8425036	7864	11.9908	9.82954	0.819758	0.662953	13.6484	.	92.7267	7.73316	90.2733	9.18388	.	41.8433	3.48963		20.4033	2.07572		30.5333	2.23714
chrX	WBGene00004121	pqn-34	-1	17021739	17030425	8076	16.028	21.0821	1.31533	1.46749e-06	16.5141	.	133.82	8.34912	218.62	10.3699	.	19.6267	1.22452		28.7967	1.36593		18.84	1.14084
chrX	WBGene00004126	pqn-39	-1	13965656	13969566	3310	12.7408	14.2962	1.12208	0.0175404	13.3792	.	29.6533	2.32743	53.8867	3.76929	.	17.0767	1.34032		24.3367	1.70231		13.0533	0.975647
chrIII	WBGene00004132	pqn-45	-1	4472055	4475557	2890	36.4304	39.1841	1.07559	0.0141325	40.7958	.	77.73	2.13365	99.09	2.52883	.	25.0867	0.688618		26.7533	0.68276		15.6867	0.384516
chrIII	WBGene00004133	pqn-46	-1	6941833	6946455	4019	20.5781	13.2965	0.646146	0.00508186	18.0878	.	42.9899	2.08911	40.4899	3.04516	.	13.9867	0.679686		12.57	0.945364		13.2867	0.734564
chrII	WBGene00004134	pqn-47	-1	10497304	10502683	4742	38.7685	40.2918	1.03929	0.0635329	38.9093	.	62.3967	1.60947	85.2	2.11458	.	29.2	0.75319		32.4667	0.805789		37.6767	0.96832
chrII	WBGene00004135	pqn-48	1	4038873	4043132	3221	2.86448	1.82055	0.635561	0.130506	2.75256	.	12.1433	4.23928	12.0267	6.60605	.	1.9	0.663296		1.38667	0.761673		0.966667	0.351188
chrV	WBGene00004136	pqn-51	1	5049704	5052200	1760	37.7159	40.3926	1.07097	0.0292917	50.5494	.	66.26	1.75682	53.5567	1.3259	.	49.6567	1.3166		77.05	1.90753		51.04	1.0097
chrV	WBGene00004138	pqn-53	-1	12063415	12065456	1441	101.161	94.9851	0.938946	0.266457	101.272	.	250.543	2.47667	244.493	2.57402	.	38.9833	0.385358		36.1733	0.380832		45.0733	0.445073
chrIV	WBGene00004140	pqn-55	1	10284818	10292986	7506	40.3478	36.2411	0.898219	0.609799	37.3357	.	165.13	4.09267	220.677	6.08912	.	30.2133	0.748823		22.7967	0.629027		24.2867	0.650495
chrI	WBGene00004147	larp-5	-1	3732985	3740430	6497	25.8773	19.1962	0.741814	0.152005	27.6349	.	0	0	0	0	.	25.31	0.978076		19.7433	1.0285		25.4667	0.92154
chrV	WBGene00004150	pqn-67	1	12924346	12928157	3202	2.49719	1.63273	0.653827	0.259597	2.01343	.	4.69333	1.87945	4.34333	2.66017	.	32.8467	13.1535		73.94	45.2861		34.7733	17.2707
chrV	WBGene00004151	pqn-68	1	12951394	12953190	1179	19.7502	18.5225	0.937837	0.681789	23.1968	.	73.8121	3.73728	64.5168	3.48316	.	3.89333	0.197129		3.43667	0.18554		0.96	0.0413851
chrV	WBGene00004152	pqn-70	-1	11226296	11228800	1895	73.1251	78.5369	1.07401	0.00894982	70.1858	.	435.31	5.95295	299.133	3.80882	.	36.9067	0.504706		41.74	0.53147		31.6633	0.451136
chrII	WBGene00004155	pqn-73	1	8539160	8545401	5641	19.9674	21.8188	1.09272	0.00870411	17.7364	.	89.1067	4.46261	89.3733	4.09616	.	2.70667	0.135554		4.34333	0.199064		4.70667	0.265368
chrIV	WBGene00004157	pqn-75	1	4071089	4077629	4998	8.33483	9.13145	1.09558	0.0291619	10.8509	.	2.15116	0.258093	3.33333	0.365039	.	3.68493	0.442112		3.14726	0.344662		4.34247	0.400193
chrIII	WBGene00004161	pqn-80	1	12626357	12651656	13223	12.4297	12.189	0.980634	0.124723	13.4164	.	14.6582	1.17929	24.3924	2.00118	.	36.9567	2.97324		18.44	1.51284		50.04	3.72978
chrII	WBGene00004166	pqn-85	-1	240717	255304	11809	17.0851	14.6943	0.860068	0.975739	15.5575	.	221.843	12.9846	160.46	10.9198	.	5.69	0.333039		5.20333	0.354105		4.34	0.278964
chrII	WBGene00004167	pqn-87	-1	12209164	12225004	14088	46.2587	39.6561	0.857268	0.929058	44.4908	.	441.567	9.54559	373.817	9.42645	.	5.08333	0.109889		4.85333	0.122385		2.77333	0.062335
chrII	WBGene00004174	pqn-95	-1	9225118	9227167	1449	22.6646	22.8185	1.00679	0.158216	21.6384	.	58.7039	2.59012	44.5658	1.95306	.	10.24	0.451806		18.8	0.823893		3.62	0.167295
chrX	WBGene00004184	prl-1	-1	3940121	3945786	5064	13.3423	24.8275	1.86081	2.01373e-16	12.1546	.	45.3248	3.39707	110.949	4.46879	.	11.7567	0.881156		22.05	0.888128		7.36667	0.60608
chrII	WBGene00004185	pro-1	-1	10539378	10543644	3244	101.238	157.513	1.55588	2.77825e-14	198.011	.	87.6033	0.865323	69.9867	0.444322	.	217.117	2.14462		348.397	2.21185		485.177	2.45025
chrIII	WBGene00004187	prp-8	1	8164089	8172639	7948	27.7275	31.285	1.1283	0.0203362	31.0337	.	239.263	8.62911	249.037	7.96026	.	7.66333	0.27638		12.1833	0.389431		7.84667	0.252843
chrII	WBGene00004188	prp-21	1	484763	490404	4503	8.85188	5.3732	0.607012	0.0137885	8.22207	.	40.6606	4.59344	38.5367	7.17203	.	1.40268	0.158462		1.45638	0.271045		2.31544	0.281612
chrIII	WBGene00004189	pars-1	1	7238602	7241222	2019	17.9071	10.6355	0.593923	0.00455438	18.2972	.	87.4533	4.88372	50.4933	4.74764	.	22.5233	1.25779		14.0767	1.32356		29.6733	1.62174
chrIV	WBGene00004192	prx-2	1	11644169	11646167	1392	4.3732	7.7773	1.7784	0.000208686	7.12213	.	31.5133	7.20601	46.06	5.92236	.	1.76667	0.403975		2.44	0.313734		4.72	0.662723
chrII	WBGene00004194	prx-5	1	8704618	8706715	1492	8.82875	9.04189	1.02414	0.244713	7.17828	.	53.1233	6.01708	49.25	5.44687	.	1.51	0.171032		1.42333	0.157415		2.05333	0.286048
chrV	WBGene00004195	prx-6	-1	4715377	4720041	3504	3.73944	3.92594	1.04987	0.272825	4.46318	.	9.13	2.44154	14.0133	3.56942	.	0.496667	0.132818		0.523333	0.133301		2.42	0.542214
chrI	WBGene00004202	pry-1	-1	14172815	14179741	5542	18.4378	10.8785	0.590008	8.21047e-05	18.5817	.	131.754	7.14585	129.844	11.9359	.	7.25667	0.393575		4.07	0.374133		6.15333	0.331149
chrV	WBGene00004203	psa-1	-1	20239214	20249781	7480	31.4603	32.4467	1.03135	0.0188675	31.4394	.	236.047	7.50302	208.97	6.4404	.	14.8867	0.473189		18.03	0.555681		20.9933	0.66774
chrIV	WBGene00004204	psa-4	1	11125446	11131143	5085	23.8382	18.6964	0.784301	0.332569	28.25	.	227.027	9.52363	186.523	9.97645	.	14.0633	0.589948		14.7167	0.787141		15.3467	0.543244
chrII	WBGene00004208	ptc-1	1	7888368	7900433	8647	18.0611	21.0067	1.16309	0.000253221	21.8194	.	97.02	5.37176	86.3367	4.10996	.	11.35	0.628422		9.82333	0.467628		4.46	0.204405
chrIII	WBGene00004213	ptp-1	1	3583657	3611978	26985	20.3449	13.6409	0.670482	0.027204	16.5698	.	68.8033	3.38185	98.1567	7.19578	.	5.16	0.253627		4.29667	0.314985		2.16667	0.13076
chrII	WBGene00004214	ptp-2	1	5918434	5921594	2559	13.2046	8.74678	0.662405	0.0580518	14.61	.	146.307	11.08	78.8633	9.01627	.	60.1933	4.55852		53.6	6.12797		37.7267	2.58225
chrV	WBGene00004216	ptr-1	-1	9178021	9181999	3378	18.7223	15.0634	0.804566	0.831911	11.6249	.	44.86	2.39607	39.8233	2.64372	.	3.76667	0.201186		2.70667	0.179686		3.50667	0.301651
chrX	WBGene00004220	ptr-5	1	17315175	17326529	10626	9.69401	17.8155	1.83778	8.42634e-18	9.34698	.	50.0671	5.16475	92.1477	5.17234	.	6.95667	0.717626		12.4233	0.697335		5.18667	0.554903
chrI	WBGene00004224	ptr-10	1	5662145	5667147	4397	15.2112	12.695	0.834586	0.791805	12.0787	.	53.0233	3.48582	52.0367	4.09898	.	6.39333	0.420305		7.21667	0.568464		6.76667	0.560215
chrIV	WBGene00004228	ptr-14	1	10613982	10620935	6353	4.7284	1.66126	0.351337	3.33902e-08	3.58224	.	12.92	2.73243	6.56667	3.95282	.	1.42333	0.301018		1.56333	0.941051		1.20667	0.336847
chrV	WBGene00004229	ptr-15	-1	6966377	6970122	3145	11.1665	4.62067	0.413799	1.24965e-07	7.36407	.	22.3467	2.00123	12.2867	2.65907	.	6.42667	0.575533		4.86	1.0518		5.55333	0.754112
chrIII	WBGene00004233	ptr-19	1	10780891	10791077	9310	6.79356	4.84608	0.713335	0.105192	5.76251	.	15.6333	2.3012	22.13	4.56658	.	3.89333	0.573092		2.87333	0.592919		0.72	0.124945
chrX	WBGene00004245	puf-9	1	5841339	5845953	4013	34.4923	59.7886	1.73339	1.60266e-16	34.9848	.	136.307	3.9518	279.007	4.66656	.	13.44	0.389652		23.9933	0.401303		14.8533	0.424565
chrV	WBGene00004248	pus-1	-1	16792744	16795064	1702	9.87015	5.58931	0.566284	0.0153237	11.2244	.	64.1467	6.49906	26.84	4.80203	.	2.96667	0.300569		2.63667	0.471734		1.80667	0.160958
chrIV	WBGene00004254	pxf-1	-1	10164309	10176372	11405	38.7572	32.1164	0.828657	0.602868	35.4115	.	227.467	5.86902	247.21	7.69731	.	3.99329	0.103034		3.84564	0.119741		2.42953	0.0686085
chrX	WBGene00004257	pxn-2	-1	10972106	10979503	5831	4.26196	6.39444	1.50035	3.7993e-05	3.83142	.	6.96667	1.63461	21.9267	3.42902	.	2.3	0.539658		3.06	0.47854		6.04667	1.57818
chrV	WBGene00004266	rab-1	-1	1262621	1264489	1267	73.4148	93.0647	1.26766	6.37775e-06	89.5979	.	781.507	10.6451	757.247	8.13677	.	27.0667	0.368682		47.42	0.509538		19.0733	0.212877
chrI	WBGene00004268	rab-5	1	9307770	9310213	1842	54.6528	47.1059	0.861911	0.966665	38.9473	.	154.67	2.83005	212.74	4.51621	.	36.22	0.662729		27.0767	0.574805		17.7533	0.455829
chrX	WBGene00004270	rab-6.2	1	17222011	17224503	1891	33.0717	62.6177	1.89339	1.40098e-17	31.0608	.	73.3333	2.21741	119.717	1.91187	.	19.0767	0.576828		29.8033	0.475957		18.1267	0.583586
chrI	WBGene00004272	rab-8	-1	3682896	3684624	1124	18.8305	13.2362	0.702913	0.159802	18.8043	.	163.146	8.66393	139.768	10.5595	.	14.2233	0.755334		9.42	0.711684		11.1267	0.59171
chrI	WBGene00004273	rab-10	-1	6457063	6459652	1986	44.8854	32.2027	0.717441	0.214373	38.9552	.	252.377	5.62268	181.613	5.6397	.	28.7933	0.641485		29.0533	0.902203		32.6067	0.83703
chrI	WBGene00004274	rab-11.1	-1	108686	110691	1299	93.3822	126.42	1.35379	4.77514e-08	105.755	.	398.977	4.27251	426.377	3.37271	.	42.1267	0.451121		71.35	0.564391		47.2233	0.446536
chrX	WBGene00004276	rab-14	-1	15604697	15606928	1631	36.1833	103.978	2.87363	1.13378e-41	42.4405	.	111.507	3.08172	379.863	3.65332	.	17.9433	0.495901		53.3267	0.512867		27.7867	0.65472
chrIII	WBGene00004277	rab-18	-1	1079455	1080695	640	43.9898	54.0828	1.22944	0.000658166	49.7578	.	106.577	2.42276	154.707	2.86055	.	15.1554	0.344521		15.5338	0.287222		32.973	0.662669
chrIII	WBGene00004282	rab-30	1	10562648	10565504	2167	11.2372	6.73027	0.598928	0.0117586	9.7485	.	52.175	4.64306	41.175	6.11788	.	9.07	0.807141		7.08333	1.05246		6.52	0.668821
chrII	WBGene00004286	rab-39	-1	9321796	9323020	624	10.5994	5.72356	0.539991	0.0342446	9.68109	.	42.4342	4.00347	22.9013	4.00124	.	2.27667	0.214793		3.66667	0.640627		4.47333	0.462069
chrIV	WBGene00004297	rad-51	-1	10281615	10284683	2449	4.59004	4.25704	0.927453	0.582137	6.25439	.	21.0833	4.59328	15.6667	3.68018	.	7.87333	1.71531		11.67	2.74134		15.5867	2.49212
chrIII	WBGene00004302	ran-1	-1	10746242	10748052	1210	31.2938	34.6616	1.10762	0.0687103	35.1455	.	135.607	4.33334	126.553	3.65111	.	16.25	0.519272		12.8067	0.369477		13.8933	0.39531
chrII	WBGene00004304	ran-3	-1	8322581	8325246	2064	12.618	9.47214	0.750686	0.332394	14.5756	.	70.1533	5.55979	54.9667	5.80298	.	12.0367	0.95393		15.67	1.65432		18.2467	1.25187
chrI	WBGene00004305	ran-4	1	8590772	8591989	617	13.5454	13.654	1.00802	0.469449	13.2285	.	212.133	15.6609	139.733	10.2339	.	2.57333	0.189979		4.41667	0.323471		2.54	0.192009
chrII	WBGene00004306	ran-5	1	6047867	6049667	1200	15.9162	11.6896	0.734443	0.315288	16.2033	.	78.516	4.93307	55.6314	4.75906	.	7.92333	0.497814		6.45	0.551773		7.97333	0.49208
chrIV	WBGene00004307	rap-1	-1	8916239	8922048	5140	26.2109	19.4086	0.740477	0.0990546	22.8732	.	103.293	3.94085	92.5586	4.76896	.	27.6433	1.05465		26.26	1.35301		28.2533	1.23522
chrV	WBGene00004308	rap-2	-1	15061246	15065118	3213	28.5321	20.4781	0.717721	0.0674978	23.2739	.	224.204	7.85797	145.901	7.12477	.	8.12667	0.284826		8.4	0.410195		4.46	0.191631
chrII	WBGene00004310	ras-1	-1	12345342	12352326	6213	14.2042	10.2863	0.724172	0.0963568	13.4841	.	88.44	6.22634	119.55	11.6223	.	2.96127	0.208479		2.15141	0.209154		3.3169	0.245985
chrX	WBGene00004313	rbc-1	1	14610584	14624788	13335	14.6872	37.3103	2.54033	4.37147e-41	15.7184	.	66.2867	4.51322	162.093	4.34446	.	13.1933	0.898287		27.2367	0.730003		8.32	0.529314
chrIII	WBGene00004314	rbc-2	-1	2512638	2528750	14411	14.2693	13.2971	0.931865	0.381978	11.7225	.	35.12	2.46122	44.67	3.35938	.	3.41	0.238974		2.63333	0.198038		3.12667	0.266723
chrIV	WBGene00004315	rbd-1	1	12724895	12730075	3767	11.0812	9.86023	0.889814	0.75857	11.841	.	31.5526	2.84739	35.2074	3.57065	.	4.56	0.411507		3.4	0.344819		0.6	0.0506714
chrX	WBGene00004317	rbg-1	1	14983463	14987298	3235	10.8379	21.4386	1.97812	7.79e-15	12.5586	.	35.3233	3.25925	69.18	3.22688	.	6.45333	0.595443		15.48	0.722061		8.21333	0.654002
chrI	WBGene00004318	rbg-2	1	7961934	7972436	9562	9.98834	8.63993	0.865002	0.976447	11.0264	.	53.0867	5.31486	42.4167	4.90938	.	3.61034	0.361456		1.54828	0.1792		1.86897	0.169499
chrIV	WBGene00004319	rbr-2	1	10919452	10926776	6533	24.7621	25.2064	1.01795	0.0501564	30.0214	.	152.377	6.15364	222.85	8.841	.	21.6667	0.874995		22.9567	0.910747		21.0333	0.700612
chrV	WBGene00004320	rbx-1	-1	9689658	9690860	602	13.2126	7.88372	0.596681	0.0539834	12.5017	.	89.805	6.79691	59.2267	7.51253	.	73.29	5.54697		38.9967	4.94648		54.3	4.34342
chrIII	WBGene00004321	rcn-1	-1	5682301	5688342	5252	12.1492	9.74172	0.801841	0.55985	12.1411	.	48.3333	3.97832	63.11	6.47832	.	5.87	0.48316		6.14	0.630279		9.42667	0.776427
chrV	WBGene00004323	rde-1	-1	9987891	9991757	3266	12.7345	9.71938	0.76323	0.315582	15.0481	.	75.8767	5.95834	64	6.58478	.	3.58333	0.281387		1.86667	0.192056		7.74667	0.514795
chrIII	WBGene00004326	rde-4	-1	10217208	10218631	823	8.49028	4.81409	0.567013	0.0464236	6.91495	.	60.0633	7.07436	57.86	12.0189	.	3.39333	0.399673		2.91667	0.60586		3.50667	0.507114
chrV	WBGene00004336	ret-1	-1	14829162	14851336	21511	29.8499	32.2313	1.07978	0.0027732	30.5729	.	338.723	11.3476	375.54	11.6514	.	9.57333	0.320716		8.78	0.272406		7.49333	0.245097
chrV	WBGene00004337	rfc-1	-1	14642725	14646281	2949	5.03289	2.60122	0.516844	0.00650174	5.22448	.	13.1367	2.61016	8.38667	3.22413	.	4.49333	0.892793		3.64	1.39934		6.40667	1.22628
chrIV	WBGene00004338	rfc-2	1	1347212	1352980	3351	7.05819	5.2071	0.737739	0.194721	8.48881	.	79.3925	11.2483	68.1386	13.0857	.	1.88667	0.267302		2.11	0.405216		3.26667	0.38482
chrIII	WBGene00004340	rfc-4	1	6972107	6973667	960	24.9391	18.563	0.744335	0.494081	21.9406	.	72.75	2.91711	76.65	4.12918	.	6.33333	0.253952		5.59333	0.301316		6.38667	0.291089
chrIII	WBGene00004344	rgs-1	-1	10014503	10016705	1583	19.784	11.3035	0.571349	0.00197706	14.3354	.	79.547	4.02078	62.9033	5.56492	.	14.2267	0.719101		12.13	1.07312		11.24	0.784071
chrIII	WBGene00004348	rgs-5	1	5698559	5702257	3098	8.01662	3.83844	0.478811	0.000472242	6.07618	.	31.7	3.95428	24.0733	6.27164	.	2.79	0.348027		1.11333	0.290048		1.08667	0.17884
chrX	WBGene00004350	rgs-7	1	3541135	3557581	15720	14.951	19.3198	1.29221	4.34406e-06	14.4479	.	207.79	13.8981	206.337	10.68	.	13.7967	0.922793		21.57	1.11647		24.04	1.66391
chrIV	WBGene00004357	rho-1	-1	16483178	16490046	5674	95.7914	75.2719	0.785789	0.345125	79.9444	.	646.063	6.74448	900.073	11.9576	.	46.46	0.485012		45.0967	0.599117		50.9	0.636693
chrIV	WBGene00004363	ric-3	1	7818152	7821149	2394	22.7433	16.9751	0.74638	0.204133	15.3855	.	64.0596	2.81664	94.2833	5.5542	.	7.75667	0.341053		9.7	0.571424		3.86	0.250885
chrV	WBGene00004364	ric-4	-1	10261105	10273851	10194	7.04704	5.10496	0.724413	0.0941953	5.06877	.	94.5233	13.4132	58.8567	11.5293	.	7.99333	1.13428		4.15333	0.813587		5.06667	0.999586
chrX	WBGene00004369	rig-1	1	8660440	8671701	10629	22.0121	30.4261	1.38224	5.91154e-06	18.1349	.	96.4833	4.3832	227.037	7.46192	.	15.0333	0.682958		15.5767	0.511952		13.1267	0.723834
chrX	WBGene00004370	rig-3	1	6853160	6860885	7081	9.91901	14.5463	1.46651	3.31826e-08	7.41548	.	45.1533	4.5522	79.0333	5.43322	.	5.46333	0.550794		12.8533	0.883614		5.18	0.698539
chrX	WBGene00004375	rme-4	-1	10373170	10379034	5251	13.1364	18.6682	1.42111	2.75562e-07	13.9878	.	80.5433	6.13133	112.21	6.01077	.	9.55034	0.727016		11.9966	0.642626		8.49664	0.607432
chrX	WBGene00004377	rme-6	1	1097052	1103317	5388	6.20768	8.5529	1.37779	0.000118884	7.12973	.	39.1567	6.30777	56.5267	6.60907	.	1.09667	0.176663		1.10667	0.129391		1.32667	0.186075
chrI	WBGene00004378	rme-8	1	8083523	8095569	10906	16.0589	13.8795	0.864285	0.983457	16.4054	.	153.493	9.55814	107.507	7.74573	.	8.35333	0.520168		6.37333	0.459191		9.17333	0.559166
chrIV	WBGene00004385	rnp-2	1	4172018	4173981	1361	20.0051	19.309	0.9652	0.295667	17.5011	.	94.98	4.74778	65.69	3.40205	.	4.56	0.227941		3.93	0.203532		5.32	0.303981
chrIII	WBGene00004388	rnp-5	-1	852791	854110	719	12.6885	11.2615	0.887537	0.80416	15.6495	.	110.647	8.72031	64.2877	5.70864	.	7.03667	0.554572		3.35667	0.298066		9.08	0.58021
chrI	WBGene00004389	rnp-6	-1	3539046	3546996	5810	15.733	12.1141	0.769979	0.425113	13.964	.	51.2885	3.25992	45.8654	3.78611	.	4.74832	0.301806		5.76174	0.475622		5.83893	0.418141
chrIII	WBGene00004392	rnr-2	-1	4093280	4095046	1166	49.2916	43.7719	0.888019	0.715564	105.805	.	198.343	4.02388	262.833	6.00462	.	41.1433	0.834693		54.84	1.25286		64.58	0.610369
chrIII	WBGene00004400	rom-1	1	4905707	4908786	2426	11.0678	5.97795	0.54012	0.00116034	11.1026	.	29.52	2.6672	31.47	5.26435	.	3.60667	0.32587		3.43	0.573776		3.62	0.326049
chrV	WBGene00004405	rop-1	-1	10252797	10255170	1773	6.51918	6.74027	1.03391	0.604149	5.33841	.	13.5067	2.07184	10.4067	1.54395	.	6.45667	0.990411		9.41333	1.39658		5.8	1.08647
chrI	WBGene00004408	rla-0	1	10567720	10569008	688	35.9491	14.3743	0.39985	1.54234e-08	37.7326	.	149.867	4.16885	49.6567	3.45455	.	15.77	0.438675		8.57667	0.596668		11.9533	0.316791
chrIII	WBGene00004414	rpl-3	1	3867628	3869527	1299	43.8368	17.6193	0.40193	8.90915e-12	42.4473	.	115.91	2.64413	57.2933	3.25173	.	13.7	0.312523		6.86667	0.389724		9.51333	0.224121
chrI	WBGene00004415	rpl-4	-1	4645637	4647212	975	22.6426	12.8251	0.566417	0.00255214	23.961	.	141.177	6.23501	77.96	6.07869	.	6.29667	0.27809		4.08667	0.318645		2.64667	0.110457
chrII	WBGene00004416	rpl-5	1	8569553	8570999	846	27.0946	13.0089	0.480128	2.6595e-05	28.9409	.	151.4	5.58784	48.63	3.73822	.	8.69128	0.320776		4.02013	0.30903		5.57718	0.192709
chrIII	WBGene00004417	rpl-6	1	7208088	7209800	1110	18.7932	9.13423	0.486038	0.000146723	18.2608	.	183.837	9.78206	77.5267	8.48748	.	8.59333	0.457257		3.98333	0.436088		5.18	0.283668
chrII	WBGene00004421	rpl-10	1	8143484	8144621	537	37.6667	29.3473	0.779132	0.438784	38.3138	.	177.177	4.70381	107.803	3.67336	.	13.8567	0.367876		8.75	0.298153		10.26	0.267789
chrX	WBGene00004423	rpl-11.2	-1	2241748	2242911	473	25.907	28.2738	1.09136	0.160477	26.5941	.	207.653	8.01534	217.617	7.69676	.	12.8433	0.495748		16.1867	0.572497		9.05333	0.340427
chrIV	WBGene00004427	rpl-15	-1	653438	654872	834	30.0102	16.0761	0.535689	0.000534568	25.5929	.	68.07	2.26823	42.72	2.65735	.	7.85	0.261578		4.37333	0.272039		5.92	0.231314
chrI	WBGene00004429	rpl-17	1	1156252	1157465	613	21.5808	10.7316	0.497279	0.00076952	20.5693	.	107.573	4.98469	56.26	5.24244	.	6.26667	0.290382		3.6	0.335456		5.2	0.252804
chrI	WBGene00004436	rpl-24.1	1	4584938	4586184	612	31.9199	20.4706	0.64131	0.0244965	31.8088	.	112.43	3.52225	46.0533	2.24973	.	11.1	0.347745		5.03	0.245718		9.05333	0.284617
chrII	WBGene00004447	rpl-33	1	7105196	7106420	623	15.6934	6.83387	0.435461	0.000192748	9.42376	.	81.9933	5.2247	26.8133	3.9236	.	8.90333	0.567329		4.59	0.671655		4.82667	0.512181
chrIV	WBGene00004458	rpn-1	-1	6906404	6910215	3211	23.0543	18.7711	0.814211	0.661726	24.7297	.	166.047	7.2024	95.48	5.08654	.	11.7167	0.508219		10.8433	0.577661		8.46	0.342099
chrIII	WBGene00004459	rpn-2	1	6198838	6202575	3137	12.8376	9.20449	0.716996	0.151383	14.4313	.	96.67	7.53023	73.7667	8.0142	.	6.94333	0.54086		6.95333	0.755428		6.16	0.42685
chrIII	WBGene00004460	rpn-3	1	8447179	8449265	1486	22.3318	29.5629	1.32381	9.23221e-05	27.4879	.	170.123	7.618	193.87	6.55788	.	3.7047	0.165894		6.68121	0.226		2.42953	0.0883855
chrII	WBGene00004461	rpn-5	-1	4696416	4698394	1377	16.2335	9.95025	0.612947	0.0215147	17.061	.	73.1926	4.50874	59.0167	5.93117	.	5.67333	0.349484		5.97667	0.600655		3.86667	0.226638
chrIII	WBGene00004462	rpn-6.1	-1	6959054	6962135	2333	12.327	10.9445	0.887844	0.842681	15.0009	.	34.7533	2.81927	24.94	2.27877	.	6	0.486735		6.71	0.613094		5.54	0.369312
chrIV	WBGene00004463	rpn-7	1	9316280	9318195	1315	31.4228	25.5589	0.813388	0.658929	39.7734	.	120.747	3.84264	70.3867	2.7539	.	5.25333	0.167182		3.43667	0.13446		5.19333	0.130573
chrI	WBGene00004464	rpn-8	1	4175106	4177274	1546	35.0598	27.826	0.793672	0.665234	67.2481	.	71.2233	2.03148	79.7033	2.86435	.	6.10667	0.174178		5.03667	0.181006		5.44	0.0808945
chrII	WBGene00004467	rpn-11	-1	4043064	4044518	849	19.3899	17.7073	0.913224	0.569168	24.0636	.	138.565	7.14626	89.6942	5.06538	.	14.1933	0.731997		13.0467	0.736796		12.08	0.502003
chrII	WBGene00004468	rpn-12	1	11652929	11654130	601	15.0283	10.5782	0.703886	0.262354	12.8436	.	48.1333	3.20285	28.62	2.70556	.	0.91	0.0605525		0.62	0.0586111		2.3	0.179078
chrIII	WBGene00004469	rps-0	-1	4752864	4754281	817	30.8311	14.3819	0.466473	2.22229e-05	28.716	.	64.8224	2.1025	33.1974	2.30828	.	7.52333	0.244018		5.90667	0.410702		5.55333	0.193388
chrIII	WBGene00004470	rps-1	1	4475699	4476856	557	17.3546	8.76571	0.505095	0.00327147	18.2316	.	64.4833	3.71564	25.7833	2.94139	.	8.3	0.47826		5.13	0.585235		2.77333	0.152117
chrIV	WBGene00004471	rps-2	-1	7925336	7926589	653	22.9188	10.0904	0.440265	3.97622e-05	26.7565	.	180.657	7.88245	81.0867	8.03606	.	5.97333	0.26063		3	0.297314		3.62	0.135294
chrIV	WBGene00004473	rps-4	-1	7083683	7084854	571	45.6095	22.6392	0.496371	0.00107384	52.3783	.	335.537	7.35673	250.713	11.0743	.	57.5067	1.26085		34.1833	1.50992		47.67	0.91011
chrIV	WBGene00004474	rps-5	-1	11110081	11111322	641	27.6357	15.142	0.547913	0.0299243	21.869	.	266.07	9.62776	118.017	7.79401	.	7.66	0.277177		4.34	0.286621		3.98	0.181993
chrI	WBGene00004475	rps-6	1	13951918	13953182	664	39.067	20.1401	0.515526	5.40029e-05	40.6837	.	335.503	8.58789	140.135	6.95804	.	18.2449	0.467015		7.86735	0.390632		12.3197	0.302817
chrIV	WBGene00004477	rps-8	-1	7312970	7314081	511	42.8933	24.4462	0.56993	0.00120629	43.1693	.	107.867	2.51476	48.7133	1.99268	.	30.94	0.721324		24.2767	0.993066		40.26	0.932608
chrII	WBGene00004478	rps-9	-1	11125310	11126489	579	27.7893	10.9136	0.392728	3.25513e-07	20.7858	.	64.5083	2.32134	28.8967	2.64776	.	7.53333	0.271088		4.93	0.451728		2.9	0.139518
chrIV	WBGene00004487	rps-18	1	14825275	14826428	552	20.0806	12.3315	0.614101	0.146454	18.8043	.	116.907	5.82187	52.96	4.29468	.	9.36667	0.466453		5.79667	0.470069		3.61333	0.192154
chrV	WBGene00004496	rps-27	-1	103385	104634	648	28.3511	19.439	0.685654	0.333295	19.4167	.	169.887	5.99225	107.333	5.52153	.	5.16	0.182004		5.54667	0.285336		5.8	0.298712
chrIII	WBGene00004498	rps-29	1	793835	795072	627	39.9649	30.4992	0.763149	0.535457	38.9841	.	196.493	4.91665	167.823	5.50255	.	16.3851	0.409988		11.7162	0.384148		6.60135	0.169335
chrV	WBGene00004501	rpt-1	-1	11980483	11982421	1338	11.0433	6.87556	0.622597	0.054834	12.4664	.	56.35	5.10262	28.2933	4.11506	.	10.3267	0.935103		6.80333	0.989495		20.3533	1.63266
chrI	WBGene00004505	rpt-5	-1	5741868	5744035	1567	15.2301	9.07881	0.596112	0.010942	16.5507	.	48.1133	3.1591	28.9433	3.18801	.	2.59333	0.170277		1.39333	0.153471		0.966667	0.0584063
chrIII	WBGene00004506	rpt-6	1	12369667	12372524	1677	15.1723	15.3345	1.01069	0.171208	21.5045	.	71.8198	4.7336	78.9185	5.14646	.	2.27273	0.149794		2.51399	0.163943		5.83916	0.271532
chrX	WBGene00004682	rsd-3	1	11798281	11803589	4225	23.0138	44.3002	1.92494	2.14164e-20	22.357	.	100.507	4.36723	156.637	3.5358	.	10.5933	0.460303		14.9867	0.338298		12.08	0.540322
chrII	WBGene00004698	rsp-1	1	11453205	11455743	1937	75.3221	78.778	1.04588	0.0222206	83.3469	.	235.923	3.13219	260.586	3.30785	.	14.2367	0.18901		17.2933	0.21952		9.16	0.109902
chrII	WBGene00004699	rsp-2	-1	11451380	11453068	1083	62.6934	61.1334	0.975117	0.144204	65.4441	.	221.763	3.53727	189.17	3.09438	.	39.18	0.624946		49.4667	0.809159		41.5533	0.634944
chrIII	WBGene00004700	rsp-3	-1	12686360	12688055	1095	56.3639	64.4913	1.1442	0.00239125	78.2128	.	282.654	5.01481	414.817	6.43213	.	27.3547	0.485323		26.5946	0.412375		13.4662	0.172174
chrII	WBGene00004702	rsp-5	1	6490016	6491305	689	26.4456	19.1219	0.723067	0.565032	25.5385	.	136.54	5.16306	93.6433	4.89717	.	6.14667	0.232427		3.25333	0.170136		4.10667	0.160803
chrIV	WBGene00004703	rsp-6	-1	7789833	7791338	905	89.7818	119.387	1.32974	7.31611e-07	99.4724	.	698.15	7.77608	496.08	4.15524	.	26.14	0.29115		34.2467	0.286855		23.1867	0.233097
chrII	WBGene00004704	rsp-7	1	10658917	10662256	2717	24.7492	23.092	0.933042	0.39472	24.5756	.	171.73	6.93882	125.883	5.45138	.	5.61333	0.226809		6.34	0.274554		6.77333	0.275612
chrIII	WBGene00004705	rsp-8	1	11825791	11831375	3912	34.4001	31.6457	0.919932	0.477459	45.3253	.	59.2215	1.72155	77.2248	2.44029	.	34.61	1.0061		29.5133	0.932617		35.5	0.783227
chrX	WBGene00004727	sax-1	-1	3646299	3650513	3177	11.1402	19.5902	1.75851	9.48106e-12	13.407	.	75.7867	6.80297	143.87	7.34399	.	3.77333	0.338712		8.40667	0.429127		10.1533	0.757317
chrX	WBGene00004729	sax-3	-1	3451920	3467440	14863	43.3796	55.1365	1.27102	1.32803e-05	42.0079	.	297.74	6.86359	448.84	8.14052	.	50.02	1.15308		59.1967	1.07364		60.7733	1.44671
chrIII	WBGene00004736	sca-1	-1	10811807	10818342	5908	61.9594	56.5081	0.912019	0.596802	73.8418	.	218.535	3.52707	124.436	2.20209	.	40.6242	0.655658		52.6275	0.931327		36.3691	0.492527
chrII	WBGene00004737	scc-1	1	4698521	4700991	1870	11.357	6.90936	0.608381	0.0229051	12.0225	.	70.29	6.18916	40.0667	5.7989	.	4.56333	0.40181		3.54	0.512349		5.32	0.442505
chrV	WBGene00004738	scc-3	1	12763671	12767921	3650	17.9808	13.2049	0.73439	0.152674	20.3107	.	67.3133	3.74362	42.6267	3.22809	.	3.06333	0.170367		3.99	0.30216		4.83333	0.23797
chrI	WBGene00004743	scm-1	-1	1862614	1873784	6497	19.9881	20.3224	1.01673	0.0495326	18.7308	.	149.283	7.4686	307.98	15.1547	.	9.08333	0.454438		8.66333	0.426295		10.88	0.580862
chrX	WBGene00004745	sdc-1	1	16275476	16282375	5673	6.47285	9.66402	1.49301	6.14385e-07	7.49075	.	32.5467	5.02818	89.26	9.23632	.	3.08667	0.476863		4.16667	0.431152		1.08667	0.145068
chrX	WBGene00004746	sdc-2	1	11521629	11533384	11147	12.9133	37.1295	2.8753	5.28848e-48	11.6547	.	124.81	9.66527	93.4567	2.51705	.	11.1333	0.862164		15.37	0.413957		10.6267	0.911792
chrV	WBGene00004747	sdc-3	-1	15039340	15048280	8067	6.6671	6.67906	1.00179	0.23504	7.5639	.	0	0	0	0	.	2.52667	0.378975		1.69667	0.254028		2.9	0.3834
chrX	WBGene00004749	sdn-1	-1	10589718	10593840	3514	58.6697	72.4535	1.23494	1.26102e-05	56.8045	.	150.717	2.5689	280.573	3.87246	.	77.3967	1.31919		147.153	2.031		99.3233	1.74851
chrII	WBGene00004751	sea-2	1	3959043	3972141	11772	24.7249	22.8563	0.924423	0.385941	31.0494	.	196.007	7.92749	130.05	5.68989	.	15.0067	0.606944		8.80333	0.38516		10.14	0.326576
chrII	WBGene00004752	sec-5	-1	9173096	9177198	3357	8.65088	5.75871	0.66568	0.0558726	7.99077	.	59.0933	6.83091	33.06	5.74087	.	3.37333	0.389941		0.45	0.0781425		3.02	0.377936
chrI	WBGene00004753	sec-8	1	10446595	10452062	4780	10.0373	5.73713	0.571579	0.000585471	9.49351	.	111.587	11.1172	75.9267	13.2343	.	1.99333	0.198592		2.74333	0.478171		3.62	0.381313
chrV	WBGene00004754	sec-23	1	20090897	20105658	10071	21.4653	21.8236	1.01669	0.0367314	20.345	.	78.68	3.66545	99.7133	4.56907	.	8.46	0.394125		6.53	0.299218		7.36667	0.362087
chrIV	WBGene00004755	sec-24.1	-1	11561967	11566255	3688	30.5466	16.5971	0.543335	1.55207e-06	26.5054	.	180.737	5.91675	141.737	8.53986	.	11.41	0.373527		7.42667	0.447468		10.14	0.382563
chrX	WBGene00004758	sek-1	1	7809780	7820688	10255	11.3317	17.2387	1.52128	9.86325e-11	13.4528	.	174.597	15.4078	196.27	11.3854	.	3.59667	0.317398		6.55333	0.380152		3.62	0.26909
chrIII	WBGene00004760	sel-2	-1	4596109	4612670	15889	20.2337	16.4765	0.814309	0.447828	17.7276	.	183.823	9.08502	235.463	14.2909	.	14.4267	0.713002		9.06333	0.550078		7.25333	0.409155
chrIII	WBGene00004762	sel-5	-1	4571721	4578515	6141	13.9025	9.8282	0.706936	0.0460769	12.9555	.	31.2667	2.24899	31.35	3.1898	.	5.26	0.378348		5.71667	0.581659		8.22667	0.634992
chrV	WBGene00004766	sel-9	-1	8301459	8302677	617	19.6937	16.8404	0.855115	0.967489	21.7585	.	181.11	9.19635	204.35	12.1345	.	3.96309	0.201237		4.6443	0.275784		0.852349	0.0391731
chrX	WBGene00004769	sel-12	1	915757	918290	1915	16.3345	25.4778	1.55976	1.18179e-07	18.1708	.	50.7633	3.10774	99.91	3.92145	.	2.38255	0.14586		4.40604	0.172936		4.50336	0.247835
chrI	WBGene00004773	sem-4	1	7031659	7048833	16533	16.8033	14.6342	0.870911	0.945606	13.1659	.	67.13	3.99506	40.6533	2.77798	.	2.71333	0.161476		3.64333	0.248961		5.66667	0.430406
chrX	WBGene00004774	sem-5	-1	7959779	7962131	1747	30.7862	37.9983	1.23426	0.000450102	29.5747	.	78.8933	2.56262	148.827	3.91667	.	49.2067	1.59833		77.8467	2.04869		62.3033	2.10664
chrIII	WBGene00004781	set-1	-1	6450755	6452830	1475	46.7956	34.4339	0.735836	0.19837	48.9346	.	133.253	2.84756	157.343	4.56943	.	49.49	1.05758		63.9233	1.85641		79.9933	1.6347
chrIII	WBGene00004782	set-2	-1	4922835	4930392	6956	16.0724	14.5064	0.902567	0.605917	19.8754	.	52.1433	3.24428	90.7533	6.25609	.	31.2167	1.94225		19.2767	1.32884		21.7133	1.09248
chrX	WBGene00004786	sex-1	-1	10201268	10205630	3762	68.8203	66.4654	0.965782	0.163927	67.1374	.	221.673	3.22105	296.443	4.46011	.	35.1267	0.510411		31.86	0.479347		33.9467	0.50563
chrX	WBGene00004788	sft-4	-1	5778830	5781947	2389	39.793	70.4872	1.77135	5.80227e-17	42.3248	.	83.9533	2.10975	231.37	3.28244	.	22.52	0.565929		58.9733	0.836653		33.6767	0.795672
chrII	WBGene00004790	sgn-1	-1	8781950	8783578	1028	11.803	7.97763	0.675897	0.16529	7.67899	.	25.7567	2.18221	27.48	3.44463	.	6.90333	0.584879		7.53667	0.944725		4.21333	0.548683
chrI	WBGene00004807	skr-1	1	9471340	9472634	525	69.2829	60.3857	0.871582	0.823697	70.8343	.	365.263	5.27206	362.893	6.00959	.	24.78	0.357664		22.61	0.374426		27.9133	0.394065
chrIV	WBGene00004816	skr-10	1	15945612	15947407	863	4.64368	6.69583	1.44192	0.0134371	4.66049	.	13.9633	3.00695	14.3233	2.13914	.	1.4223	0.306286		2.5	0.373367		0.486486	0.104385
chrIV	WBGene00004818	skr-12	1	17166274	17168015	536	6.9916	7.26959	1.03976	0.332946	6.21828	.	14.1033	2.01718	10.2833	1.41457	.	1.63333	0.233614		5.27667	0.725855		2.17333	0.349507
chrX	WBGene00004825	skr-19	-1	13223570	13225175	1005	21.5955	26.4438	1.2245	0.0445911	23.5104	.	84.8067	3.92705	119.955	4.53625	.	36.3533	1.68337		38.37	1.451		49.8133	2.11877
chrX	WBGene00004829	sli-1	-1	720325	727765	6792	28.0309	48.4513	1.72849	1.59073e-17	25.0735	.	130.447	4.65367	263.637	5.44128	.	16.09	0.574009		22.0133	0.45434		12.92	0.515286
chrV	WBGene00004830	slo-1	1	18490746	18508169	15957	16.2665	14.3193	0.880292	0.755672	12.4758	.	134.213	8.25091	124.703	8.70874	.	8.85	0.544063		10.55	0.73677		10.1533	0.813844
chrV	WBGene00004855	sma-1	1	11899363	11916604	16631	42.6138	30.9872	0.727164	0.11199	38.8889	.	185.55	4.35423	192.693	6.21848	.	14.87	0.348948		11.52	0.371766		15.4333	0.396857
chrIII	WBGene00004857	sma-3	-1	6860909	6864881	3331	5.50991	4.72486	0.85752	0.962361	4.73551	.	33.142	6.01498	19.8371	4.19845	.	10.5933	1.9226		3.47667	0.735825		11.4467	2.4172
chrII	WBGene00004860	sma-6	1	6324351	6327324	2353	5.84169	5.96366	1.02088	0.347015	5.89588	.	19.9	3.40655	22.1133	3.70801	.	1.67	0.285876		1.80667	0.302946		1.44667	0.245369
chrX	WBGene00004862	sma-9	1	10766586	10782897	15695	33.5205	46.0218	1.37295	1.57289e-09	30.8168	.	200.48	5.98083	184.793	4.01534	.	12.96	0.38663		18.78	0.408068		19.56	0.634719
chrIII	WBGene00004874	smc-4	1	4587371	4593091	5119	11.8666	8.9202	0.751708	0.183758	14.0746	.	179.6	15.1349	121.017	13.5666	.	5.33	0.449161		6.83	0.765678		4.95333	0.351934
chrI	WBGene00004875	smd-1	-1	14048073	14051091	1993	20.219	22.4957	1.1126	0.0703667	28.5996	.	54.64	2.70241	49.0867	2.18204	.	6.36	0.314555		7.15	0.317838		11.74	0.410495
chrI	WBGene00004879	smg-1	-1	6900971	6914101	12479	12.7285	9.23295	0.725378	0.0639032	10.8388	.	101.293	7.95802	73.9933	8.01405	.	2.47667	0.194577		2.29333	0.248386		3.38	0.311844
chrIII	WBGene00004884	smg-6	1	2472104	2486616	12729	15.1011	14.0322	0.92922	0.365502	15.4687	.	66.2967	4.39019	56.8133	4.04877	.	10.6267	0.703701		11.1567	0.795073		13.0533	0.843855
chrI	WBGene00004889	smp-1	1	14805045	14815703	9388	28.0123	24.8126	0.885776	0.819734	27.1255	.	88.7567	3.16849	107.213	4.32092	.	13.1667	0.470032		12.5667	0.506462		13.4067	0.494245
chrIII	WBGene00004891	smr-1	1	1143041	1145210	1180	29.1936	26.6432	0.912638	0.57001	23.6458	.	41.9737	1.43777	51.0132	1.91468	.	30.5067	1.04498		12.9533	0.486177		28.9733	1.22531
chrX	WBGene00004893	sms-2	-1	944936	949546	3928	14.46	23.354	1.61507	2.65202e-10	13.8943	.	50.0167	3.45896	109.577	4.69199	.	9.16333	0.633701		14.4733	0.619737		11.2333	0.808482
chrI	WBGene00004895	smu-1	1	12995824	13004366	7544	7.55428	4.62924	0.612797	0.00296456	7.73323	.	77.32	10.2353	33.37	7.20852	.	3.74333	0.495525		4.19667	0.906556		5.66667	0.732768
chrII	WBGene00004896	smu-2	1	3482444	3490142	6543	11.8922	8.88232	0.746904	0.198742	11.9178	.	34.8821	2.9332	38.2714	4.30872	.	3.07333	0.258433		1.31333	0.147859		1.69333	0.142085
chrV	WBGene00004897	snb-1	-1	6655534	6656824	690	38.6565	45.8862	1.18702	0.0713335	37.9239	.	190.893	4.93819	245.237	5.34445	.	43.48	1.12478		46.1233	1.00517		33.08	0.872273
chrIV	WBGene00004914	snr-1	1	17087685	17088799	514	38.5088	48.4232	1.25746	0.0266415	44.3687	.	416.727	10.8216	326.84	6.74966	.	17.5233	0.455048		19.19	0.396298		11.48	0.258741
chrI	WBGene00004915	snr-2	1	13339102	13340216	514	11.3191	11.2977	0.998109	0.386176	19.6537	.	126.44	11.1705	91.6533	8.11259	.	12.2567	1.08283		15.1167	1.33803		7.48667	0.380929
chrII	WBGene00004916	snr-3	-1	6488029	6489900	1271	42.3399	44.0716	1.0409	0.0498444	38.4485	.	106.321	2.51112	116.87	2.65182	.	20.9767	0.495435		17.6133	0.399653		12.6667	0.329445
chrV	WBGene00004917	snr-4	-1	11978499	11979939	678	26.0885	19.2758	0.738863	0.267658	24.1504	.	170.397	6.53149	105.863	5.49203	.	26.8067	1.02753		15.9733	0.828672		23.0467	0.954296
chrIII	WBGene00004922	snt-2	-1	786694	793727	5921	3.9913	3.93979	0.987094	0.340612	5.04847	.	7.85065	1.96694	10.9211	2.77199	.	3.44595	0.863364		2.84797	0.722874		2.57432	0.509922
chrI	WBGene00004924	snt-4	1	6436097	6441193	4328	2.86818	2.20414	0.768478	0.603172	2.27957	.	11.4353	3.98693	13.9964	6.35006	.	1.40667	0.490438		2.00667	0.91041		1.20667	0.529338
chrX	WBGene00004927	snx-1	1	1128741	1132922	3537	11.7727	22.7641	1.93363	4.67006e-15	14.281	.	35.4633	3.01234	86.4133	3.79604	.	18.4267	1.5652		23.4367	1.02955		19.9267	1.39532
chrII	WBGene00004930	sod-1	-1	6972670	6975810	2518	10.8558	9.52145	0.877081	0.818357	15.5437	.	187.587	17.2798	67.73	7.11342	.	26.3024	2.42288		20.4919	2.15219		23.0726	1.48437
chrII	WBGene00004945	sop-2	1	12339342	12344729	4369	21.2826	21.8532	1.02681	0.0628246	26.2026	.	96.2033	4.52029	125.669	5.75061	.	6.77181	0.318186		5.1745	0.236785		3.6443	0.139082
chrX	WBGene00004949	sox-2	-1	7458248	7463688	4819	38.3643	47.4114	1.23582	1.28233e-05	30.3242	.	130.743	3.40794	209.307	4.41469	.	13.6833	0.356669		22.9633	0.484342		15.9333	0.525432
chrX	WBGene00004951	spc-1	-1	3117445	3127677	9626	59.1988	102.793	1.7364	2.1326e-20	65.4601	.	292.78	4.94571	424.503	4.12971	.	47.71	0.805928		87.7867	0.854017		45.26	0.691413
chrI	WBGene00004952	spd-1	-1	1030632	1034356	2297	9.76339	8.18633	0.838472	0.852817	15.1189	.	103.57	10.608	63.05	7.70186	.	4.83667	0.495388		5.73333	0.700355		5.67333	0.375249
chrI	WBGene00004955	spd-5	-1	5171288	5175740	3852	5.65875	6.5501	1.15752	0.035152	5.96262	.	18.2653	3.2278	27.915	4.26176	.	5.11538	0.903978		7.6958	1.17491		7.48252	1.2549
chrV	WBGene00004975	spe-39	1	6785339	6787850	1911	13.7334	7.92072	0.576749	0.00500015	14.5154	.	49.98	3.63931	33.475	4.22626	.	2.27	0.165291		1.88	0.237352		4.23333	0.291644
chrI	WBGene00004978	spg-7	1	3466930	3477973	8274	13.4025	12.4245	0.927028	0.453979	15.4191	.	22.7917	1.70055	16.6736	1.34199	.	6.17586	0.460798		5.13448	0.413254		5.37241	0.348426
chrIII	WBGene00004980	spk-1	1	9456298	9462876	5975	46.0302	43.6295	0.947844	0.259081	44.8077	.	277.703	6.03307	449.65	10.3061	.	11.82	0.256788		13.45	0.308278		11.94	0.266472
chrV	WBGene00004984	spn-4	-1	6783169	6785228	1459	4.80123	2.71282	0.565025	0.0645651	6.0048	.	13.04	2.71597	10.4033	3.83488	.	1.39333	0.290203		0.796667	0.293668		0.24	0.039968
chrIV	WBGene00004995	spp-10	1	8476952	8480626	3071	15.9362	10.5834	0.664109	0.0203156	13.9816	.	0.6	0.0376502	0.516667	0.0488188	.	7.85333	0.492799		8.98333	0.848817		6.77333	0.484446
chrV	WBGene00005006	spr-1	-1	8126643	8129389	2146	24.545	15.0657	0.6138	0.00339761	18.719	.	56.0533	2.2837	54.6833	3.62966	.	10.2533	0.417737		11.3333	0.75226		12.5667	0.671332
chrIV	WBGene00005007	spr-2	1	8891375	8892734	759	13.334	7.13966	0.535448	0.00907201	15.7273	.	79.51	5.96296	52.4367	7.34442	.	8.91667	0.668717		6.63333	0.929083		9.41333	0.598536
chrX	WBGene00005008	spr-3	1	4512960	4516866	3300	20.5165	25.5965	1.24761	0.000127014	24.1759	.	66.65	3.2486	91.55	3.57666	.	17.8533	0.870193		36.4233	1.42298		24.8667	1.02857
chrI	WBGene00005009	spr-4	1	8100318	8109222	8025	25.7442	23.9912	0.931908	0.343539	34.0057	.	127.301	4.94484	116.317	4.84832	.	25.0533	0.973165		31.4333	1.3102		28.14	0.827508
chrIII	WBGene00005011	F26F4.8	-1	4903961	4905396	835	15.3371	8.93114	0.582321	0.0241643	12.5521	.	79.74	5.19915	45.71	5.11805	.	6.45333	0.420765		3.99	0.446752		7.96	0.634157
chrIV	WBGene00005015	spt-5	1	12051307	12055949	4030	16.6985	13.3184	0.797578	0.475236	17.7546	.	99.39	5.95203	81.5467	6.12287	.	9.06667	0.542963		8.65	0.649479		10.1533	0.571871
chrV	WBGene00005018	sqt-3	1	12352974	12354295	392	63.1339	50.7628	0.804049	0.842346	103.584	.	654.077	10.3601	355.997	7.01295	.	116.777	1.84967		141.243	2.78242	Y	65.3	0.630405
chrIII	WBGene00005021	sqv-3	-1	9778237	9780642	1803	21.4057	16.6248	0.776652	0.402064	25.0166	.	31.89	1.48979	28.3081	1.70277	.	4.24	0.198078		5.82333	0.35028		6.04667	0.241706
chrI	WBGene00005023	sqv-5	1	9938566	9953341	14059	13.8186	7.01031	0.50731	2.33076e-09	13.0227	.	196.05	14.1874	115.87	16.5285	.	7.22667	0.522967		5.80333	0.827828		12.5667	0.964982
chrII	WBGene00005026	sqv-8	1	9646414	9649165	2151	15.3868	14.8454	0.964816	0.482529	17.2576	.	41.6867	2.70925	40.2067	2.70835	.	52.3533	3.40248		64.5433	4.34769		55.7367	3.2297
chrI	WBGene00005078	src-2	1	14320622	14328946	6494	10.0719	6.44772	0.640168	0.00463187	8.95873	.	102.08	10.1351	65.08	10.0935	.	5.9	0.585787		4.15667	0.644672		8.22	0.917541
chrV	WBGene00005228	srh-2	1	728198	734280	5310	5.25885	2.58437	0.491432	0.0343571	4.89397	.	4.52	0.859503	3.75333	1.45232	.	3.57	0.678855		2.63333	1.01895		2.29333	0.468604
chrV	WBGene00005308	srh-87	-1	2944377	2946206	480	0.586458	0.304167	0.51865	0.464162	1.20833	.	0	0	0.276316	0.908435	.	1.85069	3.15571		0.722222	2.37443		1.13194	0.936782
chrV	WBGene00005310	srh-89	-1	7463260	7465589	1726	1.99594	0.795771	0.398694	0.0820527	2.80301	.	0.51	0.255518	0.346667	0.435636	.	2.78333	1.39449		3.33333	4.18881		1.81333	0.646923
chrV	WBGene00005387	srh-171	1	19962156	19972528	3635	80.6166	77.6791	0.963561	0.287267	94.1116	.	4.64894	0.0576672	5.05882	0.0651246	.	16.972	0.210528		15.049	0.193732		32.4441	0.34474
chrV	WBGene00005642	srp-1	1	753334	755049	1076	2.52184	0.899628	0.356735	0.0252891	1.96654	.	8.08	3.20401	3.47333	3.86085	.	1.37333	0.544576		0.73	0.811446		0.24	0.122042
chrIV	WBGene00005663	sars-1	1	10003569	10005562	1393	16.524	13.7294	0.830871	0.90825	16.3065	.	119.437	7.22805	48.8533	3.55831	.	7.56	0.457515		6.94	0.505486		5.32	0.32625
chrIV	WBGene00005683	sru-20	1	12495480	12497821	1556	11.6086	11.3008	0.973482	0.331883	10.0064	.	17.86	1.53851	28.2167	2.49688	.	45.8067	3.94592		35.7667	3.16498		30.16	3.01406
chrII	WBGene00006059	stc-1	-1	8563632	8566173	1876	10.9043	5.41978	0.49703	0.000455038	9.48774	.	69.86	6.40664	43.4033	8.00833	.	7.06333	0.647756		5.69	1.04986		3.96667	0.418083
chrI	WBGene00006062	stn-1	1	9501111	9505156	3273	17.1625	13.9844	0.814822	0.642246	15.069	.	76.94	4.48302	83.35	5.96021	.	14.1533	0.824664		9.12667	0.652631		9.29333	0.616717
chrX	WBGene00006063	sto-1	1	7562864	7564765	1301	60.437	79.3897	1.31359	2.08621e-06	73.048	.	263.347	4.35738	271.68	3.42211	.	18.4167	0.304725		22.5167	0.283622		19.6667	0.269229
chrX	WBGene00006066	sto-4	1	11644104	11647227	2457	17.905	39.9422	2.23079	9.27251e-22	21.0045	.	50.3133	2.81002	178.573	4.47079	.	11.6067	0.648237		20.01	0.500974		13.0267	0.620185
chrV	WBGene00006075	str-7	-1	16097510	16099526	1415	3.00353	1.76572	0.587882	0.252208	2.2735	.	4.89412	1.62945	1.5473	0.876296	.	1.27143	0.423311		0.742857	0.42071		1.42143	0.625216
chrII	WBGene00006307	suf-1	1	8603771	8606693	2321	13.4761	7.07454	0.52497	0.000234651	12.6902	.	75.88	5.63071	38.55	5.44912	.	58.3367	4.3289		17.7967	2.51559		69.1133	5.44619
chrV	WBGene00006309	sul-2	1	8154019	8159854	5217	12.9232	7.42975	0.574914	0.000271777	11.2145	.	19.54	1.51201	16.1167	2.16921	.	4.04667	0.313131		2.84667	0.383144		4.70667	0.419695
chrII	WBGene00006318	sup-9	-1	2684687	2687047	1693	4.56911	2.05405	0.449551	0.00770664	3.83107	.	17.9651	3.93187	9.25581	4.50614	.	3.44667	0.754341		1.35	0.657239		1.08667	0.283646
chrX	WBGene00006321	sup-12	1	3901023	3907653	5957	58.8639	80.1225	1.36115	5.90285e-09	46.1647	.	277.091	4.70731	563.038	7.02722	.	28.8133	0.48949		35.65	0.444943		22.1867	0.480598
chrI	WBGene00006324	sup-17	1	8792528	8797287	4158	28.9703	26.3755	0.910434	0.56238	26.0327	.	129.01	4.45318	100.267	3.8015	.	39.52	1.36416		35.6633	1.35214		40.34	1.54959
chrI	WBGene00006352	sur-6	1	9751185	9757889	6015	29.6974	25.3781	0.854557	0.865832	32.8239	.	155.08	5.222	121.973	4.80622	.	6.33	0.21315		6.32333	0.249165		7.37333	0.224633
chrX	WBGene00006353	sur-7	1	16376148	16379978	3022	7.56668	8.54467	1.12925	0.0447547	7.2227	.	59.93	7.92025	117.353	13.7341	.	5.21	0.688545		5.09667	0.596473		4.22667	0.585192
chrX	WBGene00006364	syd-2	-1	10549061	10555416	5755	27.3551	39.367	1.43911	1.40656e-09	26.4732	.	130.914	4.78575	358.684	9.11129	.	20.9833	0.767073		34.8733	0.885852		25.68	0.970036
chrX	WBGene00006365	syg-1	-1	2509600	2520588	9675	15.6956	23.2829	1.48341	7.19701e-10	14.6205	.	74.6133	4.75377	162.787	6.99167	.	11.5067	0.733114		18.9733	0.814903		9.39333	0.642478
chrX	WBGene00006366	sym-1	1	14581623	14584299	2076	45.8861	82.6474	1.80114	4.79202e-10	49.263	.	120.843	2.63355	279.303	3.37946	.	15.5433	0.338737		18.2467	0.220777		9.87333	0.200421
chrII	WBGene00006367	sym-2	-1	9178453	9188316	9244	18.7383	16.876	0.900616	0.821446	19.9984	.	150.333	8.02278	111.897	6.63051	.	10.2767	0.548431		10.6633	0.631863		9.29333	0.464704
chrX	WBGene00006368	sym-3	1	5775999	5778845	2241	9.13119	17.4072	1.90634	1.7556e-10	7.10576	.	19.7	2.15744	47.25	2.7144	.	4.76667	0.52202		12.8033	0.73552		2.64667	0.372468
chrX	WBGene00006369	sym-4	-1	14164569	14169698	4529	30.3703	69.2212	2.27924	6.026e-25	29.9004	.	171.42	5.64433	489.131	7.0662	.	13.62	0.448465		26.53	0.383264		16.9133	0.565655
chrX	WBGene00006370	sym-5	1	14577923	14580846	2323	30.492	42.6494	1.39871	1.64581e-07	27.9854	.	30.9667	1.01557	36.82	0.863319	.	15.42	0.505706		21.9933	0.515678		17.8867	0.639144
chrV	WBGene00006373	syx-5	1	11764747	11767206	1859	26.815	15.4026	0.574405	0.000521163	21.8472	.	177.01	6.60117	103.14	6.69626	.	16.0367	0.598049		10.9667	0.711999		14.48	0.662784
chrV	WBGene00006376	syp-2	1	5536453	5537702	649	4.07704	1.90447	0.46712	0.0989204	6.25424	.	8.25333	2.02434	2.60333	1.36696	.	2.70333	0.663062		2.47	1.29695		5.32667	0.851689
chrI	WBGene00006379	sys-1	-1	9980156	9984982	3867	30.5579	23.7464	0.777096	0.231377	25.5107	.	176.027	5.76043	119.067	5.01408	.	19.6967	0.644568		14.77	0.621988		10.1467	0.397741
chrII	WBGene00006380	tab-1	1	6803644	6804820	576	6.00694	4.77344	0.794653	0.867348	3.54688	.	45.1033	7.50853	31.0633	6.50754	.	2.88667	0.480555		3.09	0.647332		2.29333	0.646579
chrX	WBGene00006384	taf-3	1	16331645	16345951	12680	9.71416	13.8641	1.4272	6.81124e-09	9.14267	.	99.7532	10.2689	266.717	19.238	.	5.05333	0.520203		4.19667	0.302701		3.74	0.409071
chrI	WBGene00006385	taf-4	1	382589	388850	5283	12.871	8.27248	0.642722	0.0094465	15.1766	.	41.0116	3.18636	44.5933	5.39057	.	35.9367	2.79206		60.5733	7.32227		73.4533	4.83991
chrI	WBGene00006386	taf-5	1	7849016	7853631	3974	21.525	15.9152	0.739381	0.11449	17.9283	.	118.537	5.50692	81.4267	5.11628	.	14.0733	0.653812		12.6467	0.794628		11.3133	0.631033
chrX	WBGene00006388	taf-7.1	-1	11836129	11838130	1401	4.64026	5.15096	1.11006	0.232861	4.85582	.	12.3567	2.66293	20.8733	4.05232	.	2.18	0.469802		3.05333	0.592769		3.02	0.621934
chrX	WBGene00006393	taf-11.1	1	4255056	4256788	1132	19.822	27.7306	1.39898	5.63013e-05	23.0318	.	127.217	6.41795	230.507	8.31237	.	9.13333	0.460768		20.0867	0.724351		12.3267	0.535202
chrIII	WBGene00006395	taf-11.3	-1	10503858	10505242	784	15.0906	9.65242	0.639633	0.0761165	13.8393	.	51.6	3.41936	52.46	5.4349	.	2.83221	0.187681		2.76846	0.286815		2.30872	0.166824
chrIII	WBGene00006396	taf-12	-1	11862307	11869975	4274	21.8336	23.3226	1.0682	0.0128126	30.7656	.	55.6107	2.54702	34.51	1.47968	.	12.5667	0.575564		10.66	0.457066		11.5933	0.376828
chrIV	WBGene00006405	itsn-1	1	17119190	17126230	6301	17.1904	16.1671	0.940475	0.317811	25.0318	.	76.4342	4.44634	111.612	6.90363	.	31.1967	1.81478		30.3133	1.875		24.16	0.965172
chrIV	WBGene00006406	srgp-1	1	11568723	11578689	9319	42.5036	29.4524	0.692937	0.00510703	41.344	.	305.615	7.19033	230.177	7.81522	.	23.8433	0.560971		28.7133	0.974908		28.4733	0.688694
chrX	WBGene00006410	nck-1	-1	4148625	4157966	8653	26.8763	33.9189	1.26204	3.21375e-06	27.7788	.	167.39	6.22817	207.007	6.10298	.	19.2067	0.714632		34.1433	1.00662		19.78	0.712054
chrIV	WBGene00006416	sams-5	-1	6277424	6279509	1058	7.54679	7.81238	1.03519	0.309278	9.22968	.	28.6531	3.79672	30.8503	3.9489	.	2.10333	0.278706		1.46	0.186883		2.29333	0.248474
chrIII	WBGene00006430	tag-51	1	854225	856522	1441	12.9126	8.25781	0.639517	0.0376719	13.1999	.	79.7	6.17228	60.15	7.28402	.	2.85667	0.221232		2.85333	0.345532		7.86667	0.595966
chrX	WBGene00006431	tag-52	-1	3674030	3678659	3059	26.0361	34.5044	1.32525	1.81364e-06	28.744	.	88.89	3.4141	106.863	3.09709	.	9.22667	0.354379		16.0233	0.464385		12.0867	0.420493
chrII	WBGene00006434	prdx-2	1	5377938	5379619	1081	29.0486	33.1041	1.13961	0.00937671	28.7808	.	181.86	6.26055	152.897	4.61867	.	10.5833	0.364332		12.89	0.389378		15.5467	0.540176
chrV	WBGene00006436	ttn-1	-1	6120892	6202664	65738	9.91636	13.303	1.34152	3.07438e-09	11.1487	.	50.2467	5.06705	33.0467	2.48416	.	3.74667	0.377827		5.75333	0.432485		5.78667	0.519043
chrV	WBGene00006437	mrck-1	-1	6257384	6267552	9173	19.8215	15.0069	0.757099	0.119928	20.3804	.	143.623	7.24582	81.1733	5.40908	.	13.9633	0.704452		9.54	0.635709		10.5067	0.515529
chrIII	WBGene00006439	ant-1.1	1	13463082	13464556	799	127.541	103.258	0.809603	0.646127	152.447	.	514.743	4.0359	566.307	5.48439	.	94.0033	0.737042		119.79	1.16011		103.983	0.682093
chrV	WBGene00006442	tag-65	-1	13675976	13678667	2091	9.14228	4.27618	0.467737	0.000212479	6.91966	.	54.8204	5.99636	29.0067	6.78331	.	2.33094	0.254962		3.63669	0.850452		2.47482	0.357651
chrV	WBGene00006443	pak-2	-1	11036450	11039548	2334	19.8044	15.5195	0.783638	0.435744	19.9469	.	139.837	7.06088	127.227	8.19786	.	17.4733	0.882295		19.48	1.2552		25.7533	1.2911
chrII	WBGene00006444	shn-1	-1	11384521	11400516	15225	34.0785	27.1952	0.798016	0.299653	32.0231	.	423.853	12.4376	431.313	15.8599	.	15.19	0.445735		12.8633	0.473		15.4533	0.482568
chrI	WBGene00006447	tag-72	-1	10159972	10161945	1373	9.56045	4.33503	0.453434	0.000694893	7.74727	.	49.0164	5.127	33.9867	7.84	.	4.38	0.458137		3.32667	0.767391		1.44667	0.186732
chrIV	WBGene00006450	tag-77	-1	8503480	8511157	6825	11.2018	11.5527	1.03132	0.0647393	11.9105	.	122.936	10.9747	145.617	12.6047	.	3.87333	0.345777		4.09	0.354031		4.1	0.344235
chrIII	WBGene00006452	heh-1	-1	3198461	3200660	1392	22.4483	18.8904	0.84151	0.856607	19.6099	.	66.7316	2.97268	76.8322	4.06725	.	26.9967	1.20262		29.38	1.55528		22.32	1.1382
chrV	WBGene00006460	tag-93	-1	10532873	10537004	3531	30.5933	25.254	0.825476	0.753561	31.9292	.	118.553	3.87514	101.24	4.00886	.	19.0733	0.623448		17.6133	0.697446		26.42	0.827456
chrIII	WBGene00006463	nduf-2.2	1	6464430	6467156	2059	1.25328	1.07819	0.860298	0.966935	1.44148	.	1.50333	1.19952	3.19667	2.96484	.	2.22973	1.77912		3.16892	2.9391		6.24324	4.33114
chrV	WBGene00006465	fntb-1	1	14447629	14449576	1347	12.4373	7.54751	0.606847	0.0429366	12.3318	.	61.6333	4.95554	28.3633	3.75797	.	2.97333	0.239066		2.42667	0.321519		2.17333	0.176237
chrV	WBGene00006467	tag-117	-1	8792674	8796994	3720	26.4599	19.1851	0.725061	0.0718384	22.9844	.	54.6167	2.06413	59.8267	3.1184	.	6.58	0.248678		8.47333	0.441663		7.35333	0.319927
chrX	WBGene00006468	rhgf-1	-1	10697797	10711879	13445	3.12748	5.27438	1.68646	5.41382e-10	2.36772	.	13.2433	4.2345	23.3167	4.42074	.	1.41	0.450842		1.35667	0.257218		1.32667	0.560314
chrX	WBGene00006472	tag-123	-1	8418593	8422103	2828	27.2033	54.8662	2.01689	1.51894e-21	26.7811	.	81.7633	3.00564	190.507	3.47221	.	92.6133	3.40449		96.9567	1.76715		75.3933	2.81517
chrII	WBGene00006473	tag-124	1	9591261	9592874	1013	11.577	6.99506	0.604221	0.056353	9.97137	.	39.8467	3.44188	20.9433	2.99402	.	1.39333	0.120354		1.04	0.148676		1.08667	0.108979
chrX	WBGene00006477	tag-130	1	8791951	8796041	3483	7.90698	9.93454	1.25643	0.00308772	7.15533	.	40.3267	5.10014	116.293	11.706	.	5.10667	0.645843		2.84	0.285871		4.56667	0.638219
chrX	WBGene00006479	tmbi-4	1	9150460	9160597	9461	10.0827	17.7419	1.75964	1.35431e-15	10.1353	.	60.67	6.01726	104.1	5.86747	.	5.8	0.575245		9.29667	0.523995		3.26	0.321648
chrV	WBGene00006481	tag-135	-1	10806107	10808017	1310	16.866	12.3332	0.731245	0.483608	14.2603	.	70.42	4.17526	45.5333	3.69193	.	6.91	0.409699		6.88	0.557844		3.49333	0.244969
chrIV	WBGene00006483	dgk-4	1	8629872	8643991	13437	9.18843	7.67697	0.835504	0.72835	7.4539	.	54.2185	5.90073	56.4603	7.3545	.	4.22333	0.459636		1.56333	0.203639		3.25333	0.436461
chrV	WBGene00006489	tag-143	-1	10210412	10212421	1409	9.4159	5.97516	0.634582	0.0933133	8.73314	.	59.3033	6.29821	28.19	4.71787	.	2.25667	0.239666		2.52667	0.422862		2.18	0.249624
chrIV	WBGene00006490	tag-144	1	11038870	11047401	7820	9.03133	10.0373	1.11139	0.0118775	10.7318	.	46.473	5.14575	48.0567	4.78779	.	14.6533	1.6225		20.5167	2.04403		21.24	1.97917
chrIV	WBGene00006491	acl-3	-1	11650695	11652068	773	2.28072	1.05175	0.461146	0.141531	2.12678	.	16.9767	7.44354	7.88667	7.49864	.	1.3	0.569994		1.04667	0.99517		0.48	0.225693
chrX	WBGene00006494	hke-4.2	-1	15505966	15508047	1476	17.1579	27.124	1.58085	1.35995e-07	23.6988	.	72.5149	4.22634	116.239	4.28546	.	7.15667	0.417107		13.6433	0.502999		5.79333	0.244456
chrII	WBGene00006495	cpna-1	1	4184288	4208502	22332	6.15254	6.6497	1.08081	0.0102343	6.29715	.	12.1402	1.97321	17.6813	2.65897	.	5.88333	0.956245		3.19333	0.480222		5.78667	0.918934
chrIII	WBGene00006498	ten-1	1	6820564	6847219	26028	27.1277	21.338	0.786576	0.430846	25.1886	.	272.443	10.043	198.62	9.30828	.	4.07667	0.150277		3.51	0.164495		0.72	0.0285844
chrIII	WBGene00006513	tag-168	1	1786135	1806612	18141	4.43101	4.86679	1.09835	0.0111579	3.69373	.	20.7667	4.68666	40.09	8.23746	.	6.59333	1.488		3.44333	0.707516		1.80667	0.489117
chrII	WBGene00006514	tdp-1	1	8997629	8999663	1434	19.3225	12.9672	0.671094	0.0539245	20.0098	.	76.4767	3.9579	43.61	3.36309	.	6.99333	0.361926		2.42667	0.187138		7.46	0.372818
chrIII	WBGene00006515	tag-170	1	6431961	6433101	540	18.2102	12.138	0.666548	0.119628	14.8	.	164.143	9.01382	65.23	5.37405	.	4.89333	0.268714		4.30667	0.35481		4.95333	0.334685
chrIII	WBGene00006519	tag-174	1	5081234	5082969	1122	28.0258	18.8173	0.671426	0.044161	27.4064	.	184.277	6.57524	203.697	10.825	.	12.69	0.452796		9.48333	0.503969		12.9267	0.471666
chrII	WBGene00006520	tag-175	1	9323120	9324761	1020	17.2799	14.1314	0.817792	0.855581	15.9706	.	89.5134	5.1802	64.0567	4.53294	.	8.08333	0.467788		5.93667	0.420105		2.17333	0.136083
chrV	WBGene00006523	tam-1	-1	4958590	4965852	6610	60.7873	49.1984	0.809354	0.42678	66.3436	.	222.053	3.65296	147.967	3.00755	.	21.34	0.35106		14.8867	0.302584		23.2867	0.351001
chrX	WBGene00006524	tap-1	1	14589250	14591894	2044	16.807	28.3324	1.68575	7.55256e-10	16.4535	.	43.1154	2.56532	94.5577	3.33744	.	5.29333	0.314948		6.4	0.22589		5.8	0.352508
chrIV	WBGene00006527	tax-6	-1	10493176	10506778	12946	23.248	19.2345	0.827361	0.605372	19.4374	.	147.16	6.33	75.6433	3.93269	.	11.3833	0.489647		6.12667	0.318525		5.90667	0.303881
chrI	WBGene00006528	tba-1	-1	9785769	9788631	1908	66.0807	68.8192	1.04144	0.0190603	77.9898	.	348.55	5.27461	272.533	3.96014	.	17.2267	0.260691		19.83	0.288146		11.2267	0.14395
chrI	WBGene00006529	tba-2	-1	12964668	12966857	1148	35.6198	33.1751	0.931367	0.399705	52.4364	.	95.56	2.68278	91.7367	2.76523	.	57.6567	1.61867		38.59	1.16322		47.5667	0.90713
chrIII	WBGene00006536	tbb-1	-1	10740766	10742564	941	48.8719	43.9798	0.899899	0.563826	58.7386	.	159.997	3.27379	139.73	3.17714	.	18.3067	0.374584		22.6067	0.514024		31.1667	0.5306
chrIII	WBGene00006537	tbb-2	-1	4015748	4019947	3209	27.0821	21.1337	0.780356	0.328016	30.3908	.	170.37	6.29087	181.95	8.60948	.	8.92667	0.329615		10.79	0.510559		9.42667	0.310182
chrX	WBGene00006538	tbb-4	-1	9434393	9436911	1725	20.509	31.6316	1.54233	3.6321e-08	20.0499	.	78.21	3.81345	143.627	4.54061	.	6.49333	0.316609		14.7733	0.467044		4.81333	0.240068
chrIII	WBGene00006542	tbp-1	1	7384071	7386067	1387	11.0815	9.1788	0.828302	0.784218	14.8717	.	114.423	10.3256	74.1433	8.07767	.	63.0467	5.68938		37.7267	4.11019		54.2467	3.64765
chrIII	WBGene00006543	tbx-2	-1	5130888	5136268	4780	33.2826	25.6394	0.770355	0.213462	25.4421	.	67.7267	2.03489	57.15	2.22899	.	23.2967	0.699965		29.0367	1.1325		21.5867	0.848464
chrIV	WBGene00006561	tcl-2	1	177562	183251	4507	51.1357	29.7313	0.58142	0.0012036	53.2547	.	215.55	4.21526	118.927	4.00005	.	42.58	0.832687		28.55	0.960267		58.5133	1.09874
chrIII	WBGene00006563	teg-1	-1	11312114	11317069	3371	13.6716	12.6854	0.927865	0.461873	14.2234	.	59.1679	4.32779	37.209	2.93321	.	6.13667	0.448862		8.40333	0.662441		6.4	0.449964
chrI	WBGene00006565	tfg-1	1	14101264	14104463	2197	17.5032	17.4622	0.99766	0.167492	22.8835	.	222.073	12.6876	267.497	15.3186	.	5.89	0.33651		7.40333	0.423963		3.5	0.152949
chrV	WBGene00006567	tgt-2	1	18998418	19000922	1379	19.0141	19.8988	1.04653	0.120108	17.182	.	196.073	10.312	192.677	9.68281	.	91.29	4.80116		91.9733	4.62205		66.9733	3.89787
chrI	WBGene00006577	tlf-1	-1	8697917	8702398	3542	21.229	17.1642	0.808526	0.607769	23.0237	.	85.39	4.02233	63.56	3.70306	.	18.2267	0.858575		26.41	1.53867		28.8767	1.25421
chrIII	WBGene00006579	tlk-1	1	9697551	9710184	11991	44.6755	30.4157	0.680813	0.00218985	45.4586	.	381.881	8.54788	300.306	9.8734	.	18.349	0.410717		12.745	0.419026		14.0872	0.309892
chrIV	WBGene00006580	tlp-1	-1	13701216	13703998	2182	101.504	88.2424	0.869352	0.966272	95.9349	.	230.153	2.26744	177.617	2.01283	.	65.3333	0.643655		100.313	1.13679		36.3133	0.37852
chrV	WBGene00006582	tmd-2	1	8332414	8340655	7638	15.566	14.5445	0.934378	0.369728	14.1421	.	106.267	6.82685	102.242	7.02959	.	3.41	0.219067		3.81333	0.262184		2.40667	0.170178
chrX	WBGene00006584	tni-1	-1	11375816	11379288	2843	37.1687	69.0906	1.85884	2.89969e-19	35.1611	.	154.097	4.14588	305.89	4.42738	.	17.1833	0.462307		32.3367	0.468033		12.7867	0.363659
chrX	WBGene00006588	tnt-3	-1	7937519	7944978	6823	13.4574	25.8729	1.92258	2.86595e-19	13.413	.	25.96	1.92906	32.0067	1.23708	.	7.19667	0.534776		10.8333	0.418714		7.24667	0.540271
chrV	WBGene00006589	tnt-4	-1	1989478	1993022	2294	7.16521	8.39364	1.17144	0.0267904	7.67829	.	18.9664	2.64702	21.9833	2.61905	.	3.45	0.481493		4.48	0.533738		1.20667	0.157153
chrIII	WBGene00006590	toc-1	1	5275186	5277762	1912	28.5267	25.392	0.890114	0.842964	33.3823	.	130.017	4.55772	110.613	4.35623	.	4.76667	0.167095		7.85333	0.309284		6.89333	0.206497
chrIII	WBGene00006592	dpy-31	1	7201676	7207601	4760	11.181	10.0061	0.89492	0.7666	10.662	.	33.7767	3.0209	31.34	3.13209	.	3.97667	0.355663		5.56333	0.555995		5.92	0.555244
chrI	WBGene00006593	tol-1	1	443347	461610	15658	53.9186	34.03	0.631137	0.0504992	44.5466	.	602.667	11.1773	431.5	12.68	.	53.9367	1.00034		44.2667	1.30081		42.7067	0.958697
chrI	WBGene00006594	tom-1	1	5545767	5561645	13075	7.78382	7.57751	0.973495	0.18044	6.56512	.	26.21	3.36724	36.4167	4.80589	.	9.82667	1.26245		8.82333	1.16441		9.18	1.3983
chrI	WBGene00006595	top-1	1	13289942	13296856	6209	28.8165	20.8873	0.724837	0.0414181	31.2628	.	104.593	3.62964	122.063	5.84391	.	11.5067	0.39931		13.1611	0.630101		9.48322	0.303339
chrII	WBGene00006601	tpi-1	-1	12036767	12042106	3970	32.3156	31.4038	0.971783	0.2697	38.8457	.	111.333	3.44519	127.81	4.06989	.	9.38667	0.290468		9.62333	0.306439		7.37333	0.189811
chrX	WBGene00006602	tps-1	-1	17467046	17474976	7329	7.39173	17.0894	2.31196	1.50188e-24	14.0151	.	23.1567	3.13278	65.7933	3.84996	.	2.17667	0.294473		4.78	0.279706		3.98667	0.284456
chrI	WBGene00006607	tre-1	1	6554748	6558594	3242	15.2431	11.8404	0.776772	0.329453	13.3097	.	84.2533	5.52732	65.5667	5.53755	.	11.7367	0.769968		10.1267	0.855266		12.9333	0.971723
chrIV	WBGene00006608	tre-2	-1	6876719	6883418	6084	6.93861	7.94839	1.14553	0.0141031	7.01282	.	46.03	6.63389	36.7167	4.61938	.	67.2222	9.68814		68.1111	8.56917		74.8519	10.6736
chrV	WBGene00006613	trm-1	-1	14183109	14185605	1866	10.3612	6.48339	0.625737	0.0450751	10.9544	.	49.9367	4.81958	22.04	3.39946	.	2.68333	0.258979		2.73	0.421076		3.38	0.30855
chrII	WBGene00006626	tsn-1	1	4706583	4710166	2983	27.1401	16.3165	0.601193	0.000384436	26.4479	.	155.987	5.74746	75.1833	4.60782	.	18.07	0.665804		10.6	0.649651		14.4867	0.547744
chrX	WBGene00006635	tsp-9	1	1244597	1247494	2262	15.1481	19.9052	1.31404	0.000180455	15.5203	.	43.1133	2.84612	55.0167	2.76394	.	11.42	0.75389		15.2767	0.767472		11.24	0.724211
chrX	WBGene00006637	tsp-11	1	9161549	9165950	3798	6.01264	10.2101	1.69811	9.89707e-08	4.34044	.	28.9167	4.80931	55.28	5.41424	.	5.83333	0.970179		11.47	1.1234		3.24667	0.748004
chrIV	WBGene00006638	tsp-12	-1	10149141	10151567	1823	22.2411	15.3143	0.68856	0.0639109	21.3873	.	121.017	5.44113	64.3367	4.20108	.	7.81333	0.351302		7.79	0.508674		8.44667	0.394939
chrV	WBGene00006639	tsp-13	1	19153472	19157676	2832	5.47511	4.54502	0.830125	0.743536	4.14371	.	36.8826	6.73641	31.6119	6.95528	.	2.27667	0.415821		2.63667	0.580122		3.99333	0.963709
chrX	WBGene00006640	tsp-14	-1	4866653	4882812	15296	23.0149	28.6097	1.24309	0.00566111	23.3375	.	177.343	7.70557	369.01	12.8981	.	11.4167	0.496055		22.91	0.800778		12.78	0.547617
chrX	WBGene00006643	tsp-17	1	3680769	3684219	2836	11.8875	17.9141	1.50697	9.37852e-07	10.0645	.	35.9767	3.02642	76.5033	4.27056	.	7.43333	0.625306		12.4333	0.694051		2.04667	0.203354
chrX	WBGene00006646	tsp-20	-1	12031530	12038720	6587	9.598	15.6244	1.62788	2.98378e-09	7.79642	.	39.4633	4.11162	128.873	8.2482	.	2.56667	0.267417		6.90667	0.442043		3.14	0.402749
chrV	WBGene00006648	ttb-1	1	155456	166895	7565	11.7153	9.72591	0.830191	0.694772	14.7528	.	49.5101	4.22612	54.04	5.55629	.	25.0833	2.14108		18.2367	1.87506		52.3	3.54509	Y
chrX	WBGene00006649	tth-1	-1	8422426	8426368	3342	35.6086	49.3796	1.38673	1.05649e-07	32.9719	.	122.3	3.43456	143.07	2.89735	.	13.4333	0.37725		32.9367	0.66701		14.3667	0.435725
chrII	WBGene00006655	tub-1	-1	8154044	8157020	2376	12.3548	14.2771	1.1556	0.0159137	10.9449	.	28.625	2.31691	39.5461	2.76988	.	4.99333	0.404161		5.24	0.36702		2.78	0.254
chrV	WBGene00006668	twk-13	-1	12320168	12332020	11252	6.76098	6.01853	0.890187	0.780992	5.35416	.	21.22	3.1386	28.72	4.77193	.	41.1484	6.08616		20.0879	3.33768		60.989	11.391
chrX	WBGene00006672	twk-18	1	8987924	8991906	3371	5.78982	6.73183	1.1627	0.0518616	4.04657	.	39.47	6.81713	72.47	10.7653	.	2.10667	0.363857		3.65	0.5422		3.01333	0.744663
chrIII	WBGene00006683	twk-31	1	11410575	11424563	11412	9.30858	7.26906	0.780899	0.295221	7.09551	.	67.7033	7.27322	66.6593	9.17028	.	9.95667	1.06962		5.48667	0.754797		10.6133	1.49578
chrV	WBGene00006684	twk-32	1	13796489	13800535	3446	9.10461	12.8669	1.41323	0.00015722	16.886	.	2.87333	0.315591	6.83333	0.531077	.	79.8133	8.76625		131.99	10.2581		136.02	8.05522
chrIV	WBGene00006698	uaf-2	-1	17116726	17118690	1068	36.6905	43.3563	1.18167	0.044885	47.6934	.	170.677	4.65179	145.16	3.34807	.	15.4133	0.42009		22.22	0.512498		17.7667	0.372519
chrIV	WBGene00006699	uba-1	-1	9989649	9995204	4955	25.8086	26.2844	1.01844	0.164023	28.0726	.	82.1567	3.18331	74.6267	2.8392	.	215.313	8.3427		117.28	4.46197		157.617	5.61462
chrI	WBGene00006702	ubc-3	1	1698182	1701132	1670	77.5341	70.8626	0.913953	0.472297	86.0877	.	500.139	6.45056	373.736	5.2741	.	52.2633	0.674069		72.5333	1.02358		68.71	0.798139
chrII	WBGene00006703	ubc-6	1	7479124	7480669	945	17.5339	11.5683	0.659766	0.0994086	17.1746	.	36.89	2.10393	35.94	3.10678	.	9.29327	0.530018		8.07212	0.697782		6.61538	0.385184
chrIII	WBGene00006704	ubc-7	-1	9630001	9631353	752	21.4182	27.1961	1.26977	0.00287887	23.3205	.	74.09	3.4592	62.1733	2.28611	.	36.4233	1.70058		33.36	1.22664		37.5867	1.61175
chrIV	WBGene00006705	ubc-8	-1	2704691	2708638	3049	18.8972	11.1061	0.587712	0.000642399	24.3578	.	28.4533	1.50569	50.88	4.58127	.	34.2667	1.81332		39.3667	3.5446	Y	31.02	1.27351
chrIV	WBGene00006708	ubc-13	-1	2922593	2926249	2819	31.5623	37.6242	1.19206	0.00291048	34.9752	.	154.403	4.892	161.779	4.29988	.	44.9919	1.4255		72.3455	1.92285		57.439	1.64228
chrIII	WBGene00006713	ubc-18	-1	7067627	7068737	510	15.8088	12.3706	0.782512	0.55996	14.1451	.	92.83	5.87204	69.01	5.57855	.	18.31	1.15821		22.9867	1.85817		17.1267	1.21078
chrV	WBGene00006714	ubc-19	-1	18686293	18689865	2271	7.03126	4.45663	0.63383	0.142492	6.65654	.	19.27	2.74062	25.9567	5.82429	.	1.40333	0.199585		2.36	0.529548		3.14	0.471717
chrIII	WBGene00006715	ubc-20	1	188745	190942	1495	27.9241	21.1445	0.757213	0.250932	34.9893	.	87.8355	3.14551	69.2527	3.27521	.	14.3433	0.513655		14.51	0.686231		11.9533	0.341628
chrI	WBGene00006720	ubc-25	1	10562744	10564903	1558	62.3315	49.3135	0.791149	0.393195	51.5363	.	341.373	5.47674	143.79	2.91584	.	30.1867	0.484292		19.2467	0.390292		21.7	0.421063
chrII	WBGene00006724	ubh-4	-1	8038219	8039488	669	14.9006	7.11659	0.477604	0.00162466	15.2511	.	131.343	8.81464	64.9	9.11953	.	6.34899	0.42609		4.12752	0.579985		1.57047	0.102974
chrIII	WBGene00006727	ubq-1	1	5939300	5943791	2075	119.219	163.744	1.37347	9.15255e-10	159.387	.	843.127	7.07208	1244.34	7.59929	.	25.3	0.212214		46.6533	0.284917		23.7933	0.149281
chrV	WBGene00006729	ucp-4	1	9334137	9336631	1884	6.57431	3.36465	0.511788	0.0102134	4.95276	.	67.4933	10.2662	31.7067	9.42347	.	2.31	0.351368		1.56333	0.464635		4.71333	0.951658
chrII	WBGene00006737	ulp-2	-1	4955638	4959863	3617	17.2002	10.3985	0.60456	0.00141835	18.6475	.	113.123	6.57687	88.92	8.5512	.	6.87333	0.399609		6.59333	0.634064		8.34667	0.447602
chrII	WBGene00006739	ulp-4	1	8126316	8133210	6187	30.6514	23.8216	0.777178	0.238263	28.3429	.	98.63	3.2178	118.57	4.97742	.	7.15333	0.233377		6.78	0.284616		13.9067	0.490658
chrX	WBGene00006741	unc-1	-1	1057548	1062833	4682	10.9793	20.9931	1.91206	1.26587e-15	9.51794	.	28.7267	2.61644	50.35	2.39841	.	13.0671	1.19016		21.2047	1.01008		6.79866	0.714299
chrX	WBGene00006743	unc-3	1	14773500	14783495	9049	5.28534	7.571	1.43245	1.37385e-06	4.33584	.	32.9467	6.2336	49.01	6.47338	.	0.706667	0.133703		1.94	0.256241		0	0
chrX	WBGene00006746	unc-6	1	6889518	6897100	6978	11.7832	16.6373	1.41195	1.52491e-07	11.0936	.	47.8367	4.05974	109.903	6.60584	.	6.78333	0.57568		14.0133	0.842285		4.71333	0.42487
chrI	WBGene00006751	unc-11	-1	3799127	3806662	6827	22.6544	16.4382	0.725607	0.371264	19.3388	.	65.88	2.90805	112.793	6.86167	.	23.6767	1.04513		19.7533	1.20167		12.9133	0.667742
chrI	WBGene00006753	unc-14	-1	7122604	7128258	5050	49.9261	47.8742	0.9589	0.184734	41.3874	.	231.03	4.62744	194.943	4.07199	.	55.47	1.11104		71.2967	1.48925		43	1.03896
chrI	WBGene00006754	unc-15	-1	7376601	7383152	5951	27.7482	22.5158	0.811433	0.532556	23.3512	.	96.4833	3.4771	85.0933	3.77927	.	23.8233	0.858554		34.8667	1.54854		14.9333	0.63951
chrIII	WBGene00006755	unc-16	1	9546129	9556428	9526	31.9703	31.6642	0.990425	0.0808102	29.0724	.	224.195	7.01261	188.641	5.95754	.	17.3433	0.542482		17.1733	0.542357		12.5467	0.431566
chrX	WBGene00006757	unc-18	1	7682144	7685632	2888	15.0272	22.4988	1.49721	8.53831e-08	13.946	.	67.9527	4.52199	104.007	4.62277	.	5.65667	0.376429		5.06667	0.225197		6.16667	0.442182
chrV	WBGene00006760	unc-23	1	8936485	8939963	2875	22.9099	40.3278	1.76028	1.92081e-14	34.2071	.	27.8033	1.21359	42.9633	1.06535	.	8.15667	0.356032		20.6533	0.512136		10.7467	0.314165
chrIV	WBGene00006761	unc-24	1	7979867	7981990	1522	23.6416	18.3173	0.774793	0.412115	16.7989	.	88.3867	3.73861	93.1833	5.08716	.	9.98	0.422137		8.47667	0.462767		6.75333	0.402009
chrIV	WBGene00006763	unc-26	-1	13261532	13272600	8432	15.5855	16.313	1.04668	0.025323	15.0383	.	50	3.20811	77.5267	4.75245	.	5.12925	0.329104		7.41156	0.454336		9.23129	0.613852
chrX	WBGene00006764	unc-27	1	8789279	8790568	677	14.8582	26.0827	1.75544	7.27842e-05	13.322	.	43.6833	2.94002	128.183	4.91449	.	10.01	0.673702		16.9433	0.6496		6.88667	0.516939
chrI	WBGene00006765	unc-29	-1	8897604	8902590	4356	12.2958	7.84814	0.638278	0.00816912	8.61364	.	13.8121	1.12332	10.98	1.39906	.	54.24	4.41126		70.64	9.00086		42.92	4.9828
chrIV	WBGene00006767	unc-31	1	12771729	12787489	14528	6.30252	6.09058	0.966373	0.225765	5.10318	.	69.2889	10.9938	57.2857	9.40562	.	5.26333	0.835116		5.51	0.904675		4.95333	0.970637
chrIII	WBGene00006768	unc-32	1	8905397	8911669	5159	38.3858	43.2872	1.12769	0.00142168	44.7516	.	153.07	3.98767	188.22	4.34817	.	18.75	0.488461		14.9667	0.345753		17.2533	0.385536
chrIV	WBGene00006769	unc-33	1	3515934	3526598	9815	35.0333	33.5323	0.957156	0.177338	35.3889	.	276.537	7.89353	339.933	10.1375	.	13.0467	0.372407		11.1433	0.332316		8.80667	0.248854
chrIII	WBGene00006772	unc-36	-1	8193777	8201653	7247	15.4589	14.7306	0.952892	0.300483	11.6825	.	25.6233	1.65752	33.38	2.26602	.	9.35	0.60483		10.2133	0.693339		6.88	0.588916
chrI	WBGene00006773	unc-37	-1	6742294	6745607	2335	61.9021	49.3375	0.797024	0.350046	57.2049	.	295.027	4.76602	319.397	6.47371	.	105.58	1.7056		86.7967	1.75924		92.63	1.61927
chrI	WBGene00006774	unc-38	-1	4897368	4901017	3037	7.92262	3.89085	0.491106	0.000502751	5.06289	.	49.91	6.29968	43.1567	11.0918	.	3.66333	0.462389		2.5	0.642534		4.35333	0.859851
chrV	WBGene00006775	unc-39	1	14373358	14375872	1912	12.4668	9.37945	0.752355	0.576855	12.3143	.	44.4033	3.56173	37.67	4.01623	.	3.05667	0.245185		4.62667	0.493277		7.61333	0.61825
chrI	WBGene00006776	unc-40	-1	5679847	5691677	11201	30.159	25.8264	0.856343	0.913563	30.1853	.	296.713	9.83831	219.793	8.51041	.	15.5033	0.514054		16.42	0.635784		12.08	0.400194
chrV	WBGene00006777	unc-41	-1	9966380	9978504	11279	10.5973	8.02212	0.756993	0.195691	9.8698	.	89.8	8.47382	109.337	13.6294	.	34.3667	3.24295		17.98	2.2413		30.0333	3.04295
chrV	WBGene00006778	unc-42	-1	9764621	9769332	4109	22.2997	17.4866	0.784163	0.547149	15.5858	.	63.0897	2.82917	51.0467	2.91919	.	3.78333	0.169658		7.83667	0.448152		8.20667	0.526548
chrIII	WBGene00006784	unc-49	1	10520703	10532604	11017	10.1206	7.63025	0.753934	0.141709	8.48879	.	67.3101	6.65081	44.8487	5.87775	.	6.26	0.618541		5.77333	0.756637		3.85333	0.453932
chrV	WBGene00006786	unc-51	-1	19995956	20005768	7494	33.2024	35.5392	1.07038	0.00537587	39.9101	.	114.338	3.44366	192.429	5.41454	.	28.75	0.865902		40.8433	1.14925		18.5867	0.465713
chrI	WBGene00006789	unc-54	-1	14855888	14863517	6183	27.0168	24.4707	0.905759	0.499612	33.9922	.	122.893	4.54877	121.197	4.95272	.	20.1467	0.745708		18.8033	0.768401		16.8867	0.49678
chrI	WBGene00006791	unc-57	1	4674129	4679410	4603	9.4005	7.96394	0.847182	0.954275	10.9092	.	71.1767	7.57158	108.263	13.5942	.	13.0333	1.38645		9.93	1.24687		16.56	1.51799
chrI	WBGene00006793	unc-59	1	13629055	13633485	2983	28.911	20.9571	0.724883	0.0675165	28.9462	.	89.9633	3.11173	66.5967	3.17776	.	15.3567	0.53117		13.8733	0.661988		15.4667	0.534325
chrV	WBGene00006794	unc-60	1	1474795	1479582	3218	95.9918	75.1276	0.782646	0.447906	94.8198	.	99.7533	1.03919	133.183	1.77276	.	115.57	1.20396		71.5867	0.952868		78.35	0.826305
chrV	WBGene00006795	unc-61	-1	14731080	14734485	2753	10.9591	6.95351	0.634494	0.0238392	10.619	.	52.5	4.79052	51.9667	7.47345	.	14.8033	1.35078		9.82667	1.4132		20.5133	1.93176
chrV	WBGene00006796	unc-62	1	4491831	4511435	17979	35.7715	26.6316	0.744492	0.150439	33.9967	.	147.151	4.11364	125.597	4.71607	.	10.97	0.306668		9.83333	0.369235		7.71333	0.226885
chrI	WBGene00006797	unc-63	1	5140570	5149229	5403	8.88257	7.89941	0.889316	0.74999	5.95817	.	25.1382	2.83006	53.8158	6.81264	.	8.45667	0.952052		4.13	0.522824		4.58667	0.769811
chrIII	WBGene00006798	unc-64	1	13268986	13284263	12645	13.1664	12.5955	0.95664	0.212168	12.3776	.	44.14	3.35247	56.7333	4.50424	.	5.38333	0.408868		3.43667	0.272848		8.83333	0.713656
chrV	WBGene00006801	unc-68	-1	6901669	6930346	26605	12.0093	11.8339	0.985396	0.0992496	11.1859	.	60.6833	5.05303	74.3267	6.28081	.	5.61	0.467138		6.18	0.522228		4.57333	0.408848
chrV	WBGene00006803	unc-70	1	6879779	6891385	10984	65.9056	65.8294	0.998844	0.0451391	74.5798	.	207.497	3.14839	295.04	4.48189	.	30.8133	0.467537		47.2367	0.717562		27.5	0.368733
chrI	WBGene00006805	unc-73	-1	3999345	4032558	32365	28.1778	23.9868	0.851267	0.83078	27.2308	.	6.86	0.243454	20.9433	0.873118	.	68.98	2.44803	Y	64.8333	2.70287	Y	43.21	1.58681
chrI	WBGene00006807	unc-75	1	11591141	11601596	7310	32.5025	25.5035	0.784662	0.275911	32.3031	.	158.8	4.88577	111.353	4.3662	.	18.1133	0.55729		19.62	0.769307		17.4	0.538647
chrV	WBGene00006808	unc-76	1	15071550	15080127	7698	27.3016	19.7464	0.723268	0.0339127	22.2786	.	176.18	6.45311	234.057	11.8532	.	20.2067	0.740128		21.9067	1.1094		17.2467	0.774134
chrX	WBGene00006810	unc-78	-1	3408650	3411713	2452	16.5098	22.6336	1.37092	2.08975e-05	16.5163	.	13.9267	0.84354	30.5	1.34756	.	15.6067	0.945298		22.8667	1.0103		15.4533	0.935641
chrX	WBGene00006816	unc-84	1	13584137	13589757	5017	43.0562	65.2915	1.51642	3.05962e-12	41.8714	.	81.5133	1.89318	170.217	2.60703	.	5.95333	0.138269		11.46	0.175521		7.33333	0.175139
chrIII	WBGene00006818	unc-86	-1	8212687	8216220	2933	29.0271	21.904	0.754606	0.1873	19.5097	.	101.166	3.48521	73.3176	3.34722	.	6.43667	0.221747		13.3733	0.610542		5.91333	0.303097
chrI	WBGene00006819	unc-87	-1	6761229	6769083	6440	11.9685	13.633	1.13908	0.00278949	10.2568	.	48.47	4.0498	46.0933	3.38101	.	20.2967	1.69584		24.1433	1.77095		17.16	1.67303
chrI	WBGene00006820	unc-89	1	4035748	4090963	53938	7.12953	8.0427	1.12808	0.000577394	7.95162	.	41.8041	5.86351	50.1926	6.24076	.	2.11333	0.29642		1.52667	0.18982		1.2	0.150913
chrI	WBGene00006823	unc-94	-1	5992672	6001100	7824	23.9303	20.5588	0.859112	0.981262	20.2725	.	114.83	4.79852	121.447	5.90729	.	7.82667	0.327061		10.6367	0.517378		11.84	0.584043
chrI	WBGene00006824	unc-95	-1	14381349	14384953	2281	24.1716	18.4643	0.763882	0.371178	16.3919	.	101.717	4.2081	113.227	6.1322	.	8.04667	0.332897		11.6633	0.63167		7.36667	0.449408
chrX	WBGene00006825	unc-96	-1	611266	621749	8629	6.961	11.6814	1.67812	3.24115e-12	5.39217	.	45.1	6.47895	81.71	6.99487	.	3.76014	0.540171		4.47297	0.382913		1.34459	0.249361
chrX	WBGene00006826	unc-97	1	5592051	5594930	2279	56.2179	93.8142	1.66876	2.34624e-15	52.9581	.	180.01	3.20201	483.047	5.14897	.	18.6167	0.331152		32.9333	0.351049		15.4467	0.291677
chrX	WBGene00006827	unc-98	-1	7570329	7573590	2656	11.3701	12.3874	1.08947	0.0609579	6.94729	.	41.4	3.64113	96.8067	7.81491	.	4.61333	0.405742		9.1	0.734616		2.28	0.328186
chrI	WBGene00006829	unc-101	1	12508427	12513395	4272	16.0091	13.28	0.829524	0.710497	15.7659	.	58.15	3.6323	79.6933	6.00102	.	4.46333	0.278799		4.16	0.313254		3.38	0.214387
chrII	WBGene00006831	unc-104	1	6993126	7010579	12839	11.072	10.8091	0.976251	0.131477	8.73619	.	30.9267	2.79323	45.94	4.25014	.	6.99	0.631322		4.3	0.397814		3.25333	0.372397
chrI	WBGene00006833	unc-108	1	3824494	3826517	1415	51.377	35.8922	0.698605	0.0405492	46.8919	.	271	5.27473	164.632	4.58683	.	36.2133	0.704855		30.3133	0.844565		52.1867	1.11291
chrV	WBGene00006836	unc-112	-1	14691837	14696809	4355	69.6436	65.7141	0.943577	0.382328	61.0217	.	442.78	6.3578	511.97	7.79087	.	24.3733	0.349972		24.9133	0.379117		25.5	0.417884
chrX	WBGene00006839	unc-115	1	10146860	10152726	5189	36.6281	60.1591	1.64243	1.56714e-15	31.5592	.	73.48	2.00611	186.173	3.09468	.	39.59	1.08087		73.93	1.22891		38.2667	1.21254
chrIII	WBGene00006840	unc-116	-1	8351177	8356333	3353	81.7528	80.5319	0.985067	0.0809164	70.6494	.	0	0	0	0	.	52.3367	0.640182		64.9633	0.806678		67.8667	0.960612
chrIII	WBGene00006843	unc-119	1	10901922	10908831	5527	8.52008	5.83933	0.685361	0.0600034	8.13063	.	95.0253	11.1531	65.3608	11.1932	.	45.9295	5.39073		48.5321	8.31123		47.1154	5.7948
chrI	WBGene00006844	unc-120	1	8459119	8463008	3269	30.7069	20.857	0.679227	0.0140507	20.0728	.	89.9333	2.92876	67.7733	3.24943	.	20.99	0.683559		18.4533	0.884755		17	0.846917
chrII	WBGene00006853	unc-130	1	11280197	11283890	3053	29.5791	23.4184	0.791722	0.391347	27.3991	.	102.829	3.47642	108.609	4.63776	.	8.55333	0.289168		6.83667	0.291935		8.08	0.2949
chrII	WBGene00006856	usp-14	-1	14485549	14488674	2085	8.21079	5.26451	0.641169	0.0750495	8.33429	.	48.8455	5.94893	42.3154	8.03786	.	6.40333	0.779868		3.29667	0.626206		11.84	1.42064
chrX	WBGene00006863	gyg-1	1	3537427	3540927	2893	5.37314	12.1606	2.26321	5.38325e-13	5.82371	.	14.9667	2.78546	29.2733	2.40724	.	1.91333	0.356092		5.97667	0.49148		2.89333	0.496819
chrII	WBGene00006868	vab-1	1	4571328	4591357	18892	65.9669	50.6945	0.768484	0.360225	58.7313	.	282.395	4.28087	232.953	4.59524	.	67.6333	1.02526		79.2233	1.56276		35.86	0.610577
chrIV	WBGene00006869	vab-2	-1	3761187	3767902	6008	39.1054	29.5364	0.755301	0.297847	35.0732	.	523.72	13.3925	301.233	10.1987	.	13.4	0.342663		14.2633	0.482907		8.19333	0.233607
chrX	WBGene00006870	vab-3	1	10505406	10518589	12582	19.7339	24.1251	1.22252	0.00194868	17.159	.	63.15	3.20008	140.423	5.82063	.	10.52	0.533093		17.5367	0.726905		11.8133	0.688461
chrII	WBGene00006875	vab-9	-1	8636208	8641222	4376	24.7955	17.7315	0.71511	0.0498002	17.4204	.	146.457	5.90659	132.363	7.46487	.	10.6133	0.428035		12.9733	0.731655		11.9333	0.685022
chrX	WBGene00006881	vab-15	1	9846176	9849103	2325	12.7738	12.5598	0.983249	0.591866	9.98409	.	22.1933	1.73742	21.7133	1.7288	.	5.35667	0.419349		5.24333	0.41747		3.61333	0.361909
chrI	WBGene00006888	vbh-1	-1	3158516	3162567	3410	52.9758	47.6572	0.899603	0.613722	57.624	.	211.057	3.98402	155.067	3.25379	.	19.43	0.366771		14.79	0.310341		20.8967	0.362638
chrI	WBGene00006889	pfd-3	1	12728147	12729861	1112	9.50719	4.51304	0.474697	0.00288351	8.50809	.	75.6715	7.9594	49.7733	11.0288	.	2.47667	0.260504		1.35	0.299133		3.26	0.383165
chrX	WBGene00006890	vem-1	-1	8087340	8089618	1678	15.2563	45.3996	2.9758	1.4428e-31	20.9785	.	40.35	2.64482	105.248	2.31826	.	15.67	1.02712		31.95	0.703751		10.7467	0.512269
chrII	WBGene00006893	spon-1	1	7116567	7120500	3305	11.1929	10.0045	0.89383	0.814389	10.387	.	10.67	0.953284	11.7727	1.17674	.	5.76	0.514612		4.52	0.451795		3.73333	0.359424
chrX	WBGene00006896	ver-3	1	10990791	10997362	5962	28.8049	38.9226	1.35125	8.73278e-08	27.1359	.	104.99	3.64486	140.197	3.60194	.	8.67	0.30099		14.3467	0.368595		11.8267	0.435832
chrI	WBGene00006902	vet-6	1	13269836	13272770	2334	9.11761	9.1416	1.00263	0.299075	7.74207	.	19.4605	2.13439	15.39	1.68351	.	2.62	0.287356		5.66	0.619147		3.26667	0.421937
chrIII	WBGene00006910	vha-1	1	9780767	9781971	598	103.497	104.466	1.00936	0.0711469	109.383	.	259.587	2.50814	347.038	3.32203	.	57.1167	0.551865		64.8967	0.621225		61.8367	0.565323
chrIV	WBGene00006912	vha-3	-1	2315424	2316911	839	44.1126	53.7718	1.21896	0.0149734	42.6043	.	157.799	3.57719	186.81	3.47412	.	15.1733	0.343968		15.6467	0.290983		18.3733	0.431255
chrII	WBGene00006913	vha-4	-1	7878031	7879439	808	39.3713	28.4827	0.723438	0.182182	34.5012	.	224.863	5.71135	120.993	4.24796	.	18.57	0.471664		12.4933	0.438629		10.8667	0.314965
chrIV	WBGene00006914	vha-5	1	8302153	8307356	4579	20.8278	21.8831	1.05067	0.0343121	13.9939	.	45.3433	2.17706	59.18	2.70438	.	1.29333	0.0620965		2.70333	0.123535		1.93333	0.138156
chrIV	WBGene00006917	vha-8	1	6790668	6792450	1182	72.3731	65.7834	0.908949	0.477295	71.0072	.	236.433	3.26687	225.6	3.42944	.	41.5	0.573417		38.8133	0.590017		38.52	0.54248
chrX	WBGene00006921	vha-12	1	4190844	4193111	1654	49.5886	109.925	2.21674	2.89427e-28	55.2167	.	142.51	2.87385	350.023	3.1842	.	26.1	0.526331		49.4467	0.449822		19.8	0.358587
chrX	WBGene00006922	vhl-1	1	11306739	11308257	918	16.4744	18.9602	1.15089	0.271174	13.3268	.	60.6833	3.68349	80.8633	4.26489	.	5.71333	0.346801		11.81	0.622882		3.97333	0.298146
chrII	WBGene00006924	vig-1	1	1320678	1323094	1816	34.5691	31.2362	0.903588	0.57524	51.2847	.	185.337	5.36134	151.853	4.86145	.	66.3367	1.91896		55.1233	1.76472		66.84	1.30331
chrIV	WBGene00006931	vps-26	-1	9339383	9341733	1735	15.5568	12.117	0.778889	0.408759	18.4392	.	118.643	7.62647	89.2067	7.36211	.	71.4067	4.59007		62.4333	5.15254		38.04	2.063
chrII	WBGene00006933	vps-35	1	5907686	5911199	2913	13.128	8.38191	0.638473	0.0176738	13.8411	.	112.285	8.55308	76.5638	9.13441	.	11.71	0.891983		15.4967	1.84882		9.76667	0.70563
chrV	WBGene00006935	vars-1	1	8031370	8034994	3021	10.4528	6.87272	0.657499	0.0444828	10.0652	.	70.3367	6.72896	37.5233	5.45975	.	4.87	0.465903		5.87	0.854101		4.1	0.407344
chrIII	WBGene00006937	wah-1	1	11989983	11999492	6482	7.32305	4.98696	0.680996	0.0285753	8.86902	.	16.9333	2.31233	33.9533	6.80842	.	13.8267	1.8881		12.72	2.55065		18.1067	2.04156
chrII	WBGene00006940	wee-1.3	-1	9713602	9716733	1922	13.1764	8.81139	0.668727	0.0442299	12.371	.	44.0448	3.34271	27.8619	3.16204	.	7.54	0.572236		7.37	0.836417		7.13333	0.576619
chrIV	WBGene00006941	wnk-1	1	9198462	9212216	13077	32.9045	36.2925	1.10297	0.001571	32.9443	.	319.723	9.71671	503.553	13.8748	.	58.47	1.77696		60.9967	1.68069		38.3667	1.16459
chrX	WBGene00006942	wrk-1	-1	8387414	8398247	10227	18.9251	29.7788	1.57351	8.06913e-10	17.7674	.	60.7667	3.21091	74.37	2.49741	.	10.0367	0.530338		22.7533	0.764078		11.9267	0.671268
chrIII	WBGene00006943	wrm-1	1	5720721	5727068	5679	38.2753	25.5786	0.66828	0.00231395	35.6837	.	227.54	5.94482	144.627	5.6542	.	21.6267	0.565029		21.3867	0.836115		29.7067	0.832499
chrII	WBGene00006947	wrt-1	1	7531123	7533199	1476	36.8774	29.5217	0.800536	0.706003	32.9519	.	67.2833	1.82452	57.9433	1.96274	.	24.54	0.665449		31.4033	1.06374		27	0.819376
chrX	WBGene00006948	wrt-2	-1	3092385	3094310	1325	28.1257	56.8347	2.02074	3.06324e-11	26.1162	.	49.96	1.77631	79.69	1.40214	.	13.6033	0.483663		28.5767	0.502803		5.54	0.212129
chrIV	WBGene00006951	wrt-5	-1	4050044	4052387	1695	16.3593	11.3442	0.693444	0.0854618	15.5794	.	101.74	6.21909	60.3433	5.31929	.	15.1667	0.927098		10.74	0.946735		8.91333	0.572125
chrX	WBGene00006952	wrt-6	1	3479915	3483648	3132	4.83477	3.87564	0.801618	0.700349	3.06226	.	16.7051	3.45521	20.2436	5.22329	.	2.12	0.43849		1.45333	0.374992		0.72	0.23512
chrII	WBGene00006956	wrt-10	-1	7533252	7534418	566	23.8551	25.7314	1.07866	0.35947	25.6855	.	147.657	6.18973	87.0533	3.38315	.	10.4867	0.439598		12.5567	0.487989		6.87333	0.267596
chrI	WBGene00006958	wve-1	-1	11924776	11930619	4760	13.0873	12.9886	0.992455	0.156814	16.5173	.	88.0867	6.7307	77.85	5.99374	.	3.80531	0.290764		3.09292	0.238127		3.52212	0.213238
chrIII	WBGene00006959	xbp-1	1	4193858	4195330	872	136.47	184.982	1.35548	6.26e-05	146.503	.	798.517	5.85124	1010.78	5.46424	.	61.98	0.454167		89.9333	0.486174		96.1033	0.65598
chrI	WBGene00006961	xnp-1	-1	4665745	4671825	5438	13.2176	10.6323	0.804403	0.485632	15.7223	.	55.4966	4.19868	75.5646	7.10708	.	6.35667	0.480923		8.74	0.822023		4.1	0.260776
chrI	WBGene00006963	xpa-1	1	7158209	7160916	2104	6.44701	4.81844	0.747392	0.434357	5.48194	.	30.6167	4.74897	27.1021	5.62466	.	2.07667	0.322113		1.97667	0.410229		3.01333	0.549684
chrIV	WBGene00006968	yars-1	-1	4710855	4712583	1128	18.574	12.4898	0.672434	0.0831955	21.3271	.	134.717	7.25296	64.4333	5.15887	.	101.98	5.49046		48.4367	3.8781		98.06	4.5979
chrIV	WBGene00006970	zag-1	1	3854759	3861118	5743	39.9092	29.1006	0.729171	0.143486	38.1384	.	94.8467	2.37656	82.51	2.83533	.	21.6779	0.543179		18.6846	0.642067		18.5503	0.486395
chrIII	WBGene00006971	zak-1	-1	6853054	6857600	3932	5.33266	4.68642	0.878815	0.922775	4.13479	.	15.4333	2.89412	20.39	4.35087	.	3.15333	0.591325		2.49333	0.532034		2.29333	0.554643
chrIV	WBGene00006974	zen-4	1	6118078	6122066	3388	19.4777	16.3046	0.83709	0.784269	18.7506	.	59.1233	3.03543	36.7767	2.2556	.	7.02333	0.360583		5.76333	0.353479		6.88667	0.367277
chrI	WBGene00006978	zig-1	1	9846510	9850071	2917	14.3771	7.42441	0.516405	4.73942e-05	9.11416	.	42.79	2.97626	29.28	3.94375	.	3.89333	0.270801		3.39333	0.457051		6.4	0.702204
chrX	WBGene00006981	zig-4	1	7925385	7926541	556	21.1619	33.4901	1.58257	1.39156e-05	10.7536	.	68.24	3.22467	124.197	3.70846	.	8.29667	0.392057		27.8867	0.832684		4.71333	0.438303
chrI	WBGene00006984	zig-7	-1	4790644	4792518	1226	2.89845	1.88458	0.650204	0.391288	1.96166	.	11.7237	4.04481	5.82237	3.08947	.	1.67667	0.57847		1.6	0.848994		0.24	0.122345
chrIII	WBGene00006985	zig-8	1	13119720	13133829	10622	9.52556	7.57621	0.795356	0.368651	8.16287	.	67	7.03371	52.02	6.86623	.	97.3067	10.2153		85.4367	11.277		67.2333	8.23648
chrIII	WBGene00006986	zip-1	1	12335630	12345237	5802	10.8867	8.36522	0.76839	0.390109	10.2732	.	45.18	4.15003	37.7044	4.50728	.	8.83	0.811083		8.38333	1.00217		5.30667	0.516555
chrII	WBGene00006994	zyg-9	1	8457535	8464514	4989	16.5701	16.7803	1.01269	0.0830969	21.6797	.	141.07	8.51355	220.73	13.1541	.	7.49333	0.452221		8.29667	0.494428		10.3867	0.479097
chrII	WBGene00006996	zyg-11	1	8016326	8020708	3777	27.9551	25.4588	0.910704	0.685695	30.7791	.	62.1067	2.22166	58.0633	2.28068	.	10.3933	0.371786		8.62	0.338586		9.9	0.321647
chrII	WBGene00006999	zyx-1	1	13052065	13071460	16916	12.2981	8.82818	0.717851	0.0912313	10.0452	.	92.3658	7.5106	51.9597	5.88567	.	2.56667	0.208705		3.18667	0.360965		2.41333	0.240247
chrIII	WBGene00007000	tufm-1	-1	2811907	2815121	2614	23.0979	15.6215	0.676314	0.0278426	24.2617	.	88.09	3.81376	98.25	6.28942	.	5.02041	0.217353		4.63946	0.296992		4.68707	0.193188
chrIV	WBGene00007007	mak-2	1	884973	890187	4360	13.314	11.7341	0.881333	0.840661	13.9663	.	43.6118	3.27564	51.9408	4.4265	.	6.58	0.494217		2.97333	0.253393		7.14	0.511231
chrI	WBGene00007009	wwp-1	1	536945	542176	4049	39.0117	33.4306	0.856937	0.942849	41.8569	.	190.593	4.88554	205.347	6.14248	.	465.287	11.9268		241.543	7.22522		372.287	8.89428
chrV	WBGene00007017	mdt-17	-1	20250784	20267067	7094	14.2308	12.0746	0.848484	0.873796	14.2885	.	56.9737	4.00356	44.8102	3.71112	.	114.533	8.04829		78.0367	6.46289		117.113	8.19634
chrIII	WBGene00007019	mdt-19	1	2597330	2603212	4311	9.4122	8.50545	0.903662	0.683428	12.65	.	56.9524	6.05091	33.7872	3.97242	.	2.36333	0.251093		1.28333	0.150884		0.6	0.047431
chrV	WBGene00007023	mdt-27	-1	9209437	9212649	2602	16.614	10.7448	0.646734	0.081921	12.0942	.	83.4867	5.02509	45.6833	4.25166	.	8.27667	0.498176		8.93667	0.831719		6.74667	0.557845
chrI	WBGene00007024	mdt-28	1	7057111	7059348	1637	20.3751	27.9423	1.37139	9.78363e-05	19.7605	.	71.3684	3.50273	90.4803	3.23811	.	7.27	0.356808		13.7767	0.49304		8.22667	0.416318
chrIII	WBGene00007027	ssl-1	1	12713979	12743828	18764	27.674	24.1149	0.871393	0.927477	26.9504	.	39.155	1.41487	90.8151	3.76593	.	66.7233	2.41105		50.6533	2.1005		86.0667	3.19353
chrII	WBGene00007028	trr-1	-1	11661516	11676034	13906	14.9181	9.27812	0.621939	0.00223759	14.0351	.	117.862	7.90062	65.1579	7.02275	.	6.48333	0.434596		5.23	0.563692		5.2	0.3705
chrV	WBGene00007029	mys-1	-1	7081526	7084857	2645	7.70813	4.83516	0.627281	0.0463764	7.45104	.	30.67	3.97892	23.4416	4.84815	.	3.26667	0.423795		1.49	0.308159		2.54	0.340892
chrIII	WBGene00007030	epc-1	-1	12599529	12608462	6338	101.578	101.038	0.994679	0.0550127	93.4113	.	705.68	6.94716	892.44	8.83274	.	89.53	0.88139		124.68	1.23399		80.6033	0.862886
chrI	WBGene00007042	pbrm-1	1	7494805	7503574	8165	44.1026	38.0233	0.862157	0.9886	46.9123	.	383.617	8.69828	299.827	7.88533	.	15.8667	0.359767		15.75	0.414219		14.1267	0.301129
chrII	WBGene00007044	cpna-5	-1	7711818	7720574	8154	14.1453	9.16139	0.647662	0.00278854	10.845	.	157.867	11.1603	125.9	13.7425	.	5.42333	0.383401		5.73667	0.626178		4.95333	0.45674
chrI	WBGene00007047	wts-1	-1	10291885	10297879	5224	29.4013	21.697	0.737959	0.0734723	24.1196	.	91.5779	3.11476	97.1494	4.47755	.	37.15	1.26355		40.7367	1.87753		27.74	1.1501
chrIII	WBGene00007048	tag-182	1	6375199	6379124	3325	17.352	15.7962	0.91034	0.672676	22.3576	.	187.993	10.8341	146.11	9.24967	.	8.82667	0.508682		14.3433	0.908022		13.76	0.615451
chrI	WBGene00007053	tag-192	-1	4685869	4699317	12334	60.5498	51.7708	0.855011	0.893491	59.434	.	232.873	3.84598	233.117	4.50286	.	76.04	1.25583		68.3833	1.32089		75.2933	1.26684
chrV	WBGene00007055	tag-196	1	8592795	8597541	4146	21.1651	15.5312	0.733813	0.104761	18.9308	.	59.6233	2.81706	48.2867	3.109	.	1.81667	0.0858331		2.53667	0.163327		2.9	0.15319
chrIII	WBGene00007056	crn-7	1	8268449	8270664	1599	2.57036	0.94434	0.367397	0.0115778	2.51032	.	3.99	1.55231	3.65	3.86513	.	2.91	1.13214		2.33667	2.47439		6.04	2.40607
chrIV	WBGene00007058	dmd-6	1	14614487	14623936	8767	61.2529	67.7054	1.10534	0.101823	58.4014	.	402.953	6.57851	323.017	4.77092	.	54.26	0.885835		74.01	1.09312		50.1533	0.858769
chrX	WBGene00007059	vps-52	1	7565079	7568103	2424	10.4214	10.0307	0.962512	0.37594	11.9348	.	37.2733	3.57661	35.94	3.58299	.	200.553	19.2444		145.987	14.5539		191.287	16.0276
chrII	WBGene00007063	2L52.1	1	880	4663	3119	19.806	15.938	0.804703	0.543802	19.8695	.	44.5833	2.251	54.04	3.39065	.	7.23	0.36504		7.08667	0.444641		4.10667	0.206682
chrII	WBGene00007064	2RSSE.1	1	15256015	15273238	15676	37.0059	34.3982	0.929532	0.291572	32.2154	.	145.183	3.92324	224.697	6.53222	.	6.67	0.180241		9.85667	0.286546		10.6267	0.329863
chrIV	WBGene00007089	B0001.4	-1	12135058	12137587	1823	19.2438	13.9213	0.723415	0.143286	15.6796	.	106.677	5.54342	82.3133	5.91277	.	12.2733	0.63778		11.9867	0.861032		14.7333	0.939647
chrIV	WBGene00007091	B0001.6	1	12156856	12164252	6584	24.3233	18.9343	0.778444	0.248833	25.1633	.	81.69	3.35851	91.9233	4.85486	.	6.05667	0.249007		4.88333	0.257909		8.34	0.331435
chrI	WBGene00007094	B0019.2	1	12773515	12782247	6328	6.72061	4.18458	0.622649	0.00646662	5.92051	.	10.3961	1.5469	9.53049	2.27753	.	1.57333	0.234106		1.32	0.315444		2.54	0.429017
chrIV	WBGene00007105	B0035.1	1	11310836	11312475	1039	20.2469	18.9115	0.934043	0.522236	28.5178	.	89.1118	4.40126	55.75	2.94795	.	4.67667	0.230982		4.23333	0.22385		5.19333	0.182108
chrV	WBGene00007119	B0250.2	-1	20476717	20479215	1857	8.17851	7.07162	0.864658	0.943864	8.38934	.	32.1267	3.92818	19.1733	2.71131	.	3.77667	0.461779		5.34333	0.755602		7.61333	0.907501
chrV	WBGene00007122	B0250.5	1	20493774	20497315	2112	7.91312	4.83357	0.61083	0.0262767	8.46449	.	74.7299	9.4438	53.7846	11.1273	.	2.86333	0.361847		3.64333	0.753756		1.81333	0.214228
chrX	WBGene00007128	memb-1	-1	9440339	9441579	640	5.03984	5.13125	1.01814	0.483916	2.99375	.	33.3947	6.62615	41.4671	8.08129	.	3.68	0.730181		2.73667	0.533333		1.80667	0.603479
chrX	WBGene00007129	B0272.3	1	9431263	9432689	825	17.0406	40.3115	2.36562	1.22513e-15	15.8558	.	30.4233	1.78534	85.9633	2.13248	.	7.39667	0.434061		13.67	0.339109		12.0867	0.762289
chrIII	WBGene00007133	B0284.3	-1	4379340	4380940	965	9.05803	7.3772	0.814438	0.907411	9.28912	.	242.995	26.8265	197.154	26.7248	.	10.9367	1.2074		10.1567	1.37676		10.7533	1.15763
chrIII	WBGene00007135	cdtl-7	1	4332749	4340455	6966	13.584	9.5468	0.702798	0.0387197	13.7636	.	154.63	11.3833	125.843	13.1817	.	2.18333	0.160729		0.663333	0.0694823		1.81333	0.131749
chrIII	WBGene00007136	B0285.3	-1	4341657	4343246	855	3.98304	2.10643	0.52885	0.106499	4.89123	.	17.6833	4.43966	6.00333	2.85	.	1.20134	0.301614		1.26174	0.598996		0.483221	0.0987935
chrIII	WBGene00007137	B0285.4	1	4343361	4345194	1232	9.54464	3.54545	0.37146	2.25331e-05	8.32305	.	39.2568	4.11296	17.3033	4.88043	.	4.78333	0.501154		3.33333	0.940171		4.46667	0.536662
chrIII	WBGene00007139	mnp-1	1	4356576	4364938	7626	28.1343	26.533	0.943086	0.429529	28.5772	.	78.7767	2.80002	71.4965	2.69462	.	15.14	0.538134		17.7533	0.669103		15.7267	0.550321
chrII	WBGene00007146	B0334.6	1	11508798	11513826	4347	9.13768	7.64182	0.836298	0.804097	6.89901	.	46.21	5.05708	60.6233	7.9331	.	2.99333	0.327581		3.29667	0.431398		3.14	0.455138
chrV	WBGene00007162	fbxa-153	-1	15605705	15610463	1454	14.2675	11.5358	0.808532	0.68789	16.3418	.	62.38	4.37216	42.3033	3.66715	.	5.00685	0.350926		3.88014	0.336357		2.23288	0.136636
chrV	WBGene00007163	fbxa-154	-1	15602896	15605577	374	18.9198	8.22727	0.43485	0.00575638	20.0856	.	1.375	0.0726752	0.815789	0.0991567	.	31.1767	1.64783		34.2033	4.15731		35.2133	1.75317
chrIII	WBGene00007168	B0393.3	1	4757208	4759696	1888	11.9685	7.73888	0.646605	0.0484561	12.1107	.	47.7733	3.99159	33.5033	4.32922	.	25.4467	2.12614		15.9133	2.05628		38.72	3.19717
chrIII	WBGene00007170	B0393.5	1	4765727	4776242	9895	9.40733	7.96448	0.846625	0.860325	8.95725	.	65.5967	6.97293	82.5767	10.3681	.	4.79333	0.509532		7.16333	0.89941		4.22667	0.471871
chrX	WBGene00007175	B0395.3	-1	16034975	16040267	4149	14.7298	28.9026	1.96219	1.13272e-18	18.1847	.	78.7733	5.34788	162.28	5.61471	.	4.52349	0.307098		11.5436	0.399397		7.16107	0.393796
chrV	WBGene00007182	fbxb-119	1	18318566	18319748	581	4.49484	4.36403	0.970898	0.652558	4.23924	.	13.21	2.93893	9.3	2.13106	.	1.67667	0.373021		3.20667	0.734795		1.93333	0.456056
chrIII	WBGene00007184	B0464.2	1	9491275	9497236	5337	12.9146	9.12844	0.706834	0.126896	14.2766	.	100.853	7.80927	104.763	11.4766	.	3.77	0.291919		1.6	0.175276		2.40667	0.168575
chrII	WBGene00007191	lgc-20	-1	11340070	11343491	2686	8.76862	8.20328	0.935527	0.496332	9.21221	.	40.0496	4.56739	22.3546	2.72508	.	121.89	13.9007		76.16	9.2841		96.3533	10.4593
chrII	WBGene00007192	B0491.5	-1	11343652	11345683	1431	13.718	7.54437	0.549961	0.0035545	13.1062	.	122.01	8.89413	77.8367	10.3172	.	56.1767	4.0951		21.5067	2.85069		42.59	3.2496
chrII	WBGene00007193	B0491.6	-1	11345881	11347889	1408	14.9453	13.9638	0.934325	0.527993	16.6612	.	72.2233	4.83251	38.3367	2.74544	.	4.05667	0.271434		4.12667	0.295527		4.22667	0.253683
chrIII	WBGene00007210	agmo-1	-1	12793283	12800590	5946	13.1693	7.9931	0.606951	0.0328422	7.9778	.	56.88	4.31914	34.7222	4.34402	.	4.81333	0.365497		3.19667	0.399928		2.17333	0.272423
chrI	WBGene00007213	C01A2.1	-1	13410146	13411447	587	45.609	45.7624	1.00336	0.199045	54.7019	.	111.132	2.43662	194.033	4.24001	.	82.3516	1.8056		75.6758	1.65367		113.586	2.07645
chrI	WBGene00007214	C01A2.2	1	13395293	13398517	2592	12.2475	12.0764	0.98603	0.273629	13.2323	.	47.0767	3.84378	29.66	2.45603	.	2.8	0.228618		2.29333	0.189902		2.9	0.219161
chrI	WBGene00007217	C01A2.5	1	13384759	13387073	1524	14.3865	10.9843	0.763512	0.408993	14.0971	.	120.267	8.3597	111.114	10.1158	.	4.87667	0.338976		2.39667	0.218191		2.89333	0.205243
chrII	WBGene00007220	C01B9.1	1	13771503	13778956	3715	1.19152	1.46016	1.22546	0.151531	0.64576	.	1.53797	1.29077	4.59868	3.14944	.	0.82069	0.688775		0.503448	0.344789		0.751724	1.16409
chrII	WBGene00007224	C01G6.2	1	9266474	9268243	990	2.06515	1.04141	0.50428	0.23906	2.41111	.	0.903333	0.437417	1.04	0.998642	.	4.93667	2.39046		4.71333	4.5259		6.52	2.70415
chrII	WBGene00007225	C01G6.3	1	9269214	9271211	1395	46.4351	38.2254	0.823201	0.599293	49.2943	.	111.773	2.40709	78.9533	2.06547	.	11.0967	0.238971		9.75667	0.25524		9.64667	0.195696
chrII	WBGene00007226	C01G6.4	-1	9271202	9274027	2127	22.406	24.4725	1.09223	0.022027	27.5308	.	76.46	3.41248	74.67	3.05118	.	16.03	0.715434		22.5933	0.923213		19.6867	0.715078
chrII	WBGene00007227	C01G6.5	-1	9274994	9282810	7206	51.5753	52.5073	1.01807	0.0304915	45.4706	.	325.825	6.31746	302.95	5.76968	.	26.34	0.51071		37.6867	0.717742		24.7333	0.543941
chrV	WBGene00007235	C01G10.8	-1	15084041	15085529	888	20.7511	18.5186	0.892413	0.754848	29.3925	.	180.2	8.68387	160.983	8.69307	.	4.27	0.205772		6.38333	0.344699		3.98667	0.135636
chrV	WBGene00007236	C01G10.9	1	15082734	15084074	740	8.46959	6.62365	0.78205	0.631781	9.60946	.	22.63	2.67191	16.76	2.53033	.	7.33667	0.866236		6.56333	0.990894		12.2	1.26958
chrV	WBGene00007237	C01G10.10	-1	15080124	15082435	1695	6.76903	4.29322	0.634244	0.107197	7.04838	.	17.26	2.54985	14.3233	3.33627	.	5.15328	0.761304		3.98905	0.929152		1.57664	0.223689
chrII	WBGene00007242	C01G12.1	1	14569388	14576487	6455	10.3312	6.76352	0.654668	0.0911235	9.55941	.	201.89	19.5417	108.533	16.0469	.	2.68667	0.260053		3.37	0.498262		3.72667	0.389843
chrI	WBGene00007256	tag-298	1	7224772	7227763	2387	19.7398	10.6992	0.542011	0.000102375	17.3808	.	92.75	4.69862	64.2267	6.00294	.	12.12	0.613987		10.47	0.978577		17.1533	0.986912
chrX	WBGene00007261	C02C6.3	-1	15546646	15552420	4854	13.3011	22.7828	1.71285	6.72477e-13	14.8832	.	49.7567	3.7408	82	3.59921	.	14.2914	1.07445		26.6475	1.16963		18.7194	1.25776
chrIV	WBGene00007264	C02F4.4	-1	10513870	10515100	629	4.74006	1.78855	0.377327	0.0123255	2.75676	.	18.61	3.92611	6.2349	3.486	.	1.47667	0.311529		0.45	0.2516		1.44667	0.524771
chrX	WBGene00007266	C03A3.1	1	11257299	11260160	2260	17.1883	27.5164	1.60088	3.8461e-09	13.3389	.	46.2936	2.69332	102.154	3.71246	.	15.7333	0.915353		25.2533	0.917757		18.2233	1.36618
chrIII	WBGene00007270	C03C10.4	-1	4096875	4098908	1394	32.4788	17.1582	0.528288	2.15569e-05	22.8027	.	97.1667	2.99169	76.8633	4.47969	.	16.7567	0.515926		14.4833	0.844107		16.0467	0.703717
chrIII	WBGene00007273	C03C10.7	1	4095237	4097114	1277	2.59945	1.565	0.602049	0.292656	3.77056	.	2.90333	1.1169	3.12667	1.99788	.	6.40333	2.46334		5.06667	3.23749		7.96667	2.11286
chrX	WBGene00007284	C03H12.1	1	15689065	15696355	6087	11.6171	18.1858	1.56544	2.17517e-10	11.9527	.	25.3167	2.17927	42.08	2.31389	.	2.31	0.198846		2.71333	0.149201		0.966667	0.0808744
chrX	WBGene00007286	C04A11.2	-1	13665887	13668652	2163	11.9628	18.077	1.5111	3.2602e-06	12.2755	.	44.1526	3.69083	113.9	6.30083	.	5.89333	0.492639		6.77667	0.374878		9.44	0.769009
chrX	WBGene00007287	gck-4	1	13669802	13682008	11603	14.7867	21.1071	1.42743	2.01908e-09	16.2103	.	42.94	2.90395	57.1933	2.70967	.	4.17667	0.28246		7.06	0.334485		6.04	0.372603
chrX	WBGene00007295	C04C11.1	1	14017075	14022340	4578	14.1585	12.4163	0.876955	0.891784	9.34819	.	3.16667	0.223659	7.82692	0.630373	.	12.0233	0.849197		11.1333	0.896668		9.05333	0.968459
chrX	WBGene00007296	arrd-25	1	14027141	14037364	9496	23.1665	25.6172	1.10579	0.00257119	21.5745	.	119.757	5.16939	271.647	10.6041	.	10.4027	0.44904		11.5336	0.450227		8.98658	0.416538
chrX	WBGene00007317	C05A9.2	-1	10842617	10845021	1804	35.4174	49.4374	1.39585	6.7541e-06	41.4058	.	106.217	2.999	158.293	3.2019	.	13.7767	0.38898		21.57	0.43631		26.08	0.629864
chrII	WBGene00007329	C05C10.2	1	9921807	9930771	6296	12.1377	12.6017	1.03822	0.0496005	13.0615	.	124.343	10.2444	88.8733	7.05251	.	8.17667	0.673658		6.14	0.487238		5.43333	0.415982
chrII	WBGene00007330	C05C10.3	-1	9934345	9937775	2758	8.43202	12.5446	1.48773	1.43233e-05	16.4806	.	32.34	3.83538	52.0367	4.14813	.	1.49667	0.177498		4.41	0.351546		4.10667	0.249182
chrII	WBGene00007332	C05C10.5	1	9939118	9940278	560	1.49375	1.19107	0.79737	0.893043	1.48571	.	12.3467	8.26555	11.4267	9.5936	.	3.36333	2.2516		2.99333	2.51314		3.74	2.51731
chrIV	WBGene00007336	C05C12.4	-1	11246426	11248420	1394	4.92037	12.6775	2.57654	0.0002066	4.02224	.	7.49667	1.5236	19.8433	1.56523	.	9.13333	1.85623		8.23667	0.649705		5.54	1.37734
chrX	WBGene00007343	C05E7.1	-1	12941371	12944634	2506	8.16341	11.6325	1.42495	0.000117111	5.19952	.	24.54	3.0061	29.3633	2.52425	.	2.41333	0.295628		2.01333	0.173079		0.6	0.115395
chrX	WBGene00007348	C05G5.2	1	14747179	14750321	2523	6.65299	11.5509	1.7362	2.82882e-07	7.66904	.	31.9167	4.79734	50.3967	4.363	.	2.58667	0.388797		4.51333	0.390733		3.26	0.425086
chrX	WBGene00007349	C05G5.3	-1	14750788	14753598	2205	13.9451	29.8138	2.13794	7.86587e-07	17.0249	.	27.2867	1.95672	33.3433	1.11838	.	19.8933	1.42654		38.2533	1.28307		28.3667	1.66618
chrX	WBGene00007350	C05G5.4	1	14753761	14756390	2025	25.8696	43.5284	1.68261	3.88947e-12	31.2375	.	212.84	8.22741	479.053	11.0055	.	12.55	0.485125		14.1833	0.325841		11.0133	0.352567
chrX	WBGene00007351	C05G5.5	-1	14756006	14761075	4014	7.58097	12.3235	1.62558	3.32861e-08	7.97559	.	14.51	1.914	47.4	3.84631	.	2.86667	0.37814		6.12333	0.496883		2.41333	0.30259
chrV	WBGene00007362	cyp-35C1	-1	13896643	13898472	1218	4.28038	5.66749	1.32406	0.275508	3.40805	.	10.1233	2.36506	14.7233	2.59786	.	2.90667	0.679068		7.72	1.36216		3.86667	1.13457
chrV	WBGene00007363	stdh-1	1	13906404	13908023	699	22.7933	15.1896	0.666405	0.0625646	21.8097	.	94.8833	4.16278	66.3867	4.37055	.	5.44118	0.238718		1.83193	0.120605		3.95798	0.181478
chrV	WBGene00007365	C06B3.6	-1	13908114	13909573	853	3.66589	12.2104	3.33083	6.85591e-12	5.12427	.	17.5968	4.80014	31.8233	2.60624	.	1.92	0.523748		7.24333	0.593209		0.48	0.0936719
chrV	WBGene00007372	C06B8.7	1	15498125	15511403	12410	20.3632	21.3423	1.04808	0.0173124	21.6857	.	83.84	4.11723	78.94	3.69876	.	12.0733	0.592899		9.13	0.42779		9.78667	0.451295
chrV	WBGene00007385	atp-5	-1	11122743	11124103	760	39.9947	20.7289	0.518292	5.63697e-05	37.9461	.	163.64	4.09154	80.5067	3.88378	.	10.0767	0.25195		5.68	0.274013		8.34	0.219786
chrV	WBGene00007388	folt-1	1	11140620	11143045	1825	5.53123	1.64575	0.297538	0.00145581	4.05808	.	17.3833	3.14276	12.36	7.51024	.	2.09667	0.37906		1.35	0.820293		1.32	0.325277
chrIII	WBGene00007400	C07A9.2	-1	9694584	9697354	2154	3.96634	3.53157	0.890385	0.870496	6.28784	.	68.3633	17.2359	56.0733	15.8777	.	3.72	0.937892		3.96667	1.1232		6.64	1.05601
chrIII	WBGene00007405	C07A9.9	-1	9663210	9667952	4126	56.3907	38.971	0.69109	0.399126	24.4178	.	114.865	2.03695	79.7877	2.04736	.	36.2	0.64195		25.4733	0.653648		12.78	0.523388
chrII	WBGene00007417	C07E3.6	-1	10367682	10370892	2553	35.7076	24.083	0.674451	0.0123678	30.5233	.	338.683	9.48491	147.233	6.11357	.	16.99	0.475809		22.8867	0.950323		15.2933	0.501038
chrII	WBGene00007419	C07E3.9	1	10350122	10351557	827	1.89964	2.62515	1.38192	0.183985	2.16687	.	22.0767	11.6215	21.4167	8.15826	.	1.09	0.573794		1.97667	0.752973		0.24	0.110759
chrV	WBGene00007428	C08B6.7	-1	10130443	10134255	3212	18.2972	11.0629	0.604623	0.00129358	18.7242	.	83.6467	4.57156	37.3067	3.37224	.	6.84333	0.374011		4.64333	0.419722		5.30667	0.283413
chrV	WBGene00007429	C08B6.8	1	10134370	10143065	1120	12.2317	9.76295	0.798168	0.523015	10.7375	.	79.3033	6.48343	92.8167	9.50703	.	2.55333	0.208747		2.26333	0.231829		5.2	0.484284
chrII	WBGene00007433	C08B11.3	-1	8022599	8028438	5148	36.8861	32.3784	0.877795	0.87873	37.7425	.	194.203	5.26495	250.303	7.73057	.	18.2033	0.493502		17.9233	0.553558		26.0533	0.690291
chrV	WBGene00007439	C08E8.3	1	18349154	18350527	602	0.228405	5.3995	23.64	4.24393e-18	0.0299003	.	2.25	9.85091	9.84034	1.82245	.	0	0		1.77	0.327808		0	0
chrII	WBGene00007463	C08H9.2	-1	9886479	9892517	5438	44.77	31.855	0.711525	0.0235604	46.5795	.	228.367	5.10088	156.007	4.8974	.	5.92333	0.132306		4.27	0.134045		4.83333	0.103765
chrII	WBGene00007474	C08H9.15	1	9879984	9882473	1884	20.7914	23.6786	1.13887	0.0132888	20.2012	.	53.2767	2.56244	59.93	2.53098	.	9.05667	0.435597		12.36	0.52199		7.23333	0.358065
chrIV	WBGene00007476	C09E9.1	1	1274852	1277091	1588	12.9591	13.6955	1.05683	0.0962362	12.3948	.	36.8	2.83971	27.4033	2.0009	.	3.72	0.287058		5.39333	0.393802		3.26	0.263013
chrII	WBGene00007479	C09F9.2	1	14700276	14712525	10345	24.828	22.0459	0.887946	0.721056	29.7236	.	0	0	0	0	.	5.00667	0.201654		8.13	0.368776		4.58667	0.15431
chrIV	WBGene00007492	C09G9.1	-1	8862596	8866208	2987	18.4823	12.0457	0.651744	0.013391	19.2069	.	102.773	5.56065	98.63	8.18799	.	24.59	1.33047		13.2167	1.09721		26.4133	1.3752
chrIV	WBGene00007493	C09G9.2	-1	8868024	8869775	1151	11.7976	7.56516	0.641248	0.0689863	11.563	.	57.7633	4.89621	40.4867	5.35173	.	3.17667	0.269265		2.80333	0.370558		3.74667	0.324022
chrIV	WBGene00007505	C10C5.1	-1	9359424	9368350	8320	13.8197	10.8176	0.78277	0.278575	13.3772	.	18.1267	1.31166	16.89	1.56134	.	5.6	0.40522		3.01667	0.278866		5.07333	0.379253
chrIV	WBGene00007507	C10C5.3	1	9374797	9376475	497	1.89235	0.881288	0.46571	0.136869	1.55936	.	5.96	3.14952	1.87333	2.12568	.	0.29703	0.156963		0.514851	0.584204		0.178218	0.114289
chrIV	WBGene00007514	C10C6.6	-1	11473345	11479036	4958	23.1988	30.8697	1.33066	0.00703491	42.8743	.	54.98	2.36995	110.583	3.58226	.	246.397	10.6211		168.76	5.46685		198.09	4.62025
chrX	WBGene00007516	C11E4.1	1	9584599	9586433	1094	4.24314	9.19973	2.16814	0.000681409	4.8117	.	24.9167	5.87222	32.94	3.58054	.	3.19	0.751801		14.4733	1.57324		4.22667	0.878414
chrX	WBGene00007529	C11H1.3	-1	14307793	14312453	3901	28.4281	46.7719	1.64527	9.22232e-14	24.413	.	188.667	6.63663	324.667	6.9415	.	18.55	0.652523		36.71	0.784874		21.24	0.870029
chrX	WBGene00007531	C11H1.7	1	14327543	14330125	1892	10.4247	14.477	1.38872	0.000253753	10.2363	.	33.1367	3.17867	58.7867	4.06069	.	8.16333	0.783077		8.96333	0.619143		14.7333	1.43933
chrX	WBGene00007532	C11H1.8	-1	14295752	14297219	867	16.5704	23.6292	1.42599	0.00197377	12.1165	.	29.25	1.7652	38.2143	1.61725	.	12.17	0.734444		22.71	0.9611		8.44667	0.697121
chrV	WBGene00007534	C12D8.1	-1	10236133	10238802	2069	116.062	124.487	1.07259	0.00619783	127.604	.	386.85	3.33314	300.16	2.41118	.	34.0433	0.293321		44.7367	0.359368		43.61	0.341759
chrV	WBGene00007547	nhr-154	1	12100963	12103267	1683	10.2499	9.32977	0.910234	0.778317	8.09388	.	45.04	4.39421	29.5967	3.17228	.	7.8	0.760987		7.4	0.79316		10.98	1.35658
chrV	WBGene00007548	C13C4.4	-1	12109149	12111161	1412	9.15864	4.51735	0.493234	0.0032954	7.58924	.	20.4433	2.23214	9.95486	2.20369	.	5.21	0.568862		1.90333	0.421338		4.70667	0.620177
chrV	WBGene00007552	C13C12.2	-1	12523628	12526270	2042	9.22258	4.91308	0.532723	0.00696721	6.29775	.	26.28	2.84953	13.65	2.7783	.	2.60667	0.28264		2.22667	0.453212		1.68667	0.267821
chrII	WBGene00007557	C14A4.6	-1	10593223	10594830	893	4.38802	3.02968	0.690443	0.381891	5.38634	.	11.58	2.639	10.2433	3.381	.	2.31333	0.527193		0.936667	0.309164		4.35333	0.808218
chrII	WBGene00007560	C14A4.9	1	10599190	10600470	678	24.3827	19.9816	0.819496	0.824466	16.6077	.	135.917	5.5743	84.26	4.21689	.	5.05743	0.207419		8.93243	0.447034		3.30405	0.198947
chrII	WBGene00007561	C14A4.11	-1	10605659	10607314	1022	21.843	13.7842	0.631061	0.0672587	19.7524	.	92.9667	4.25614	48.1133	3.49046	.	12.19	0.558075		6.59333	0.478324		9.18	0.464753
chrII	WBGene00007562	C14A4.12	1	10608528	10618276	8820	7.53588	5.53237	0.734137	0.150142	6.85204	.	27.52	3.65186	32.8233	5.93296	.	4.89	0.648895		3.91667	0.707955		3.62667	0.529283
chrIII	WBGene00007573	C14B1.2	1	3701767	3703154	787	8.95934	6.93139	0.773649	0.836422	11.6874	.	26.8367	2.99538	24.5833	3.54667	.	8.69333	0.97031		12.0567	1.73943		12.6733	1.08436
chrV	WBGene00007586	ril-2	-1	12596371	12599262	2291	24.9788	14.0803	0.56369	0.0087357	28.4852	.	76.13	3.04778	31.4767	2.23551	.	2.25	0.0900763		1.42333	0.101087		1.08667	0.0381485
chrV	WBGene00007588	C14C10.5	1	12599703	12607287	6705	16.0168	10.8851	0.679605	0.0148646	15.8555	.	129.747	8.10067	77.5767	7.12688	.	7.41611	0.463021		5.03356	0.462427		3.6443	0.229845
chrX	WBGene00007591	C14H10.1	-1	10233685	10238210	3919	18.3188	31.0116	1.69288	5.23639e-13	18.7451	.	114.893	6.27187	359.9	11.6053	.	8.85667	0.483473		14.17	0.456926		4.82667	0.25749
chrX	WBGene00007593	C14H10.3	-1	10220613	10228202	6980	9.20451	19.9101	2.16308	2.86147e-22	9.98854	.	23.4	2.54223	66.7933	3.35475	.	7.86	0.853929		18.4267	0.925493		14.12	1.41362
chrX	WBGene00007595	C15A7.2	-1	12070675	12074094	2819	2.68038	4.83115	1.80241	7.76218e-05	2.07733	.	5.89667	2.19993	17.37	3.59542	.	3.2047	1.19561		4.4698	0.925205		3.40268	1.63801
chrI	WBGene00007600	C15C6.1	1	12201353	12203708	1617	11.3244	5.67656	0.50127	0.00078103	9.52319	.	42.1733	3.72412	29.2433	5.15159	.	8.93667	0.789154		3.54	0.623617		5.78	0.606939
chrI	WBGene00007602	C15C6.3	1	12206773	12212197	4737	32.131	32.6113	1.01495	0.0482869	32.3909	.	144.387	4.49371	218.545	6.70154	.	24.6067	0.765823		28.6667	0.879042		14.6133	0.451156
chrV	WBGene00007617	rrbs-1	-1	14423767	14425242	875	9.62	6.37543	0.662726	0.229707	12.5737	.	85.3467	8.87179	32.0267	5.02345	.	6.10667	0.634789		4.75667	0.746094		3.25333	0.258741
chrIII	WBGene00007626	rnf-121	-1	4168771	4171116	1655	9.53897	6.16858	0.646671	0.0991079	9.67251	.	39.4167	4.13217	32.09	5.20217	.	5.35	0.560857		4.89667	0.793808		6.28667	0.649952
chrI	WBGene00007637	C17D12.1	1	11611517	11616130	3351	12.0345	11.279	0.937226	0.485162	16.9797	.	0	0	0	0	.	4.57667	0.380297		5.01333	0.444483		4.58667	0.270126
chrI	WBGene00007645	C17E4.6	1	9422442	9431105	8055	25.6766	15.1547	0.590216	1.44917e-05	20.1926	.	269.417	10.4927	166.707	11.0003	.	4.57	0.177983		3.37	0.222373		3.01333	0.14923
chrI	WBGene00007647	C17E4.10	1	9435279	9441022	4997	25.0583	24.4676	0.976425	0.182511	22.371	.	95.4933	3.81084	89.2533	3.64782	.	43.5067	1.73622		57.9333	2.36776		39.94	1.78535
chrX	WBGene00007650	ugt-23	-1	9922845	9925054	1609	4.68552	6.2573	1.33546	0.0261128	3.87756	.	11.5933	2.47429	18.7633	2.99863	.	6.01	1.28268		12.5833	2.01098		11.82	3.04831
chrX	WBGene00007651	nra-3	-1	9925865	9932408	5811	48.0996	83.8002	1.74222	5.2795e-19	55.0332	.	195.467	4.06379	409.863	4.89096	.	15.7967	0.328416		26.4433	0.315552		18.8067	0.341733
chrX	WBGene00007652	C17G1.5	1	9941671	9944715	2333	12.2139	13.6393	1.1167	0.154117	10.0017	.	52.39	4.28938	76.99	5.64472	.	7.5	0.614055		12.1633	0.891785		7.11333	0.711211
chrX	WBGene00007653	C17G1.7	-1	9952504	9956561	3457	51.1945	70.7968	1.3829	6.24909e-09	38.688	.	97.0633	1.89597	287.217	4.05692	.	38.9333	0.760498		57.56	0.813031		32.76	0.846774
chrX	WBGene00007666	C18B12.4	-1	15036627	15040787	3220	28.3203	49.6245	1.75226	5.85622e-16	24.7761	.	140.97	4.97769	184.173	3.71134	.	16.9533	0.598627		31.8133	0.641081		12.32	0.497254
chrX	WBGene00007667	fbxa-97	-1	15042886	15045448	1702	8.17186	15.2935	1.87148	6.25716e-09	9.23149	.	34.57	4.23037	46.0633	3.01196	.	5.82333	0.712608		9.74333	0.637091		6.04	0.654282
chrV	WBGene00007675	C18D4.6	-1	17535727	17539458	2010	25.1881	23.8985	0.948803	0.271323	26.5522	.	43.9562	1.74512	32.7368	1.36983	.	42.1429	1.67313		36.4	1.52311		35.3357	1.3308
chrIII	WBGene00007679	C18D11.1	1	11814907	11819698	2970	19.1492	18.1222	0.946372	0.339862	23.2694	.	73.9033	3.85935	66.0633	3.64543	.	13.1567	0.687062		8.32667	0.459473		11.9467	0.513408
chrIII	WBGene00007680	maa-1	-1	11819705	11823345	2218	5.02728	6.01849	1.19717	0.0464091	7.30298	.	10.2033	2.02959	24.3487	4.04565	.	6.2	1.23327		6.05	1.00524		9.31333	1.27528
chrII	WBGene00007683	C18E9.2	1	8965005	8966857	1251	13.8633	10.3361	0.745575	0.463127	18.996	.	59.9267	4.32268	29.4	2.84439	.	3.57333	0.257755		4.24	0.410212		4.47333	0.235488
chrIV	WBGene00007696	tram-1	-1	10219409	10221577	1568	44.0271	24.4911	0.556273	2.17801e-05	39.7066	.	124.81	2.83484	59.6267	2.43463	.	22.8333	0.51862		16.0067	0.653572		19.4267	0.489255
chrIV	WBGene00007697	C24F3.2	1	10222229	10223729	900	11.4278	8.035	0.703111	0.574379	10.65	.	22.6067	1.97822	16.6233	2.06887	.	10.1567	0.88877		9.79333	1.21883		27.2033	2.5543
chrI	WBGene00007706	C25A1.4	-1	10169626	10173228	2979	21.551	25.8343	1.19875	0.00688981	26.0218	.	162.08	7.52076	150.173	5.81293	.	6.07333	0.281812		4.9	0.18967		3.01333	0.1158
chrI	WBGene00007707	C25A1.5	1	10175430	10178911	2856	53.3748	58.4028	1.0942	0.0226738	40.6124	.	194.477	3.6436	298.45	5.1102	.	21.4267	0.401438		36.1467	0.61892		27.04	0.665807
chrI	WBGene00007709	clec-87	-1	10184234	10185452	614	3.32248	1.48453	0.446814	0.430064	5.52606	.	5.54321	1.6684	2.06173	1.38881	.	2.54	0.76449		1.8	1.21251		5.44667	0.985633
chrI	WBGene00007710	rsa-1	1	10185834	10187540	1106	14.0077	10.0741	0.719187	0.269477	13.4919	.	12.2267	0.872854	10.4167	1.034	.	7.44667	0.531613		7.05333	0.700142		6.4	0.47436
chrI	WBGene00007712	C25A1.13	1	10192990	10194259	669	5.11211	3.36921	0.659064	0.364879	5.53961	.	62.4467	12.2154	31.71	9.41171	.	1.98667	0.38862		1.00333	0.297795		0.966667	0.174501
chrIV	WBGene00007736	C25G4.10	1	12468003	12474866	3103	21.9365	16.5972	0.7566	0.209462	17.9017	.	0	0	0	0	.	6.51333	0.296917		5.76	0.347047		4.7	0.262545
chrII	WBGene00007744	C26D10.3	1	8325356	8329608	3652	3.26698	1.64677	0.504065	0.0118797	4.40389	.	30.18	9.2379	16.77	10.1836	.	1.48333	0.454038		1.52667	0.927068		2.77333	0.629747
chrX	WBGene00007750	syg-2	1	14653723	14662772	7905	20.656	32.2056	1.55914	1.28727e-11	19.2104	.	116.6	5.64486	192.683	5.98291	.	17.7567	0.859638		34.5133	1.07166		14.7133	0.765906
chrIV	WBGene00007752	C26H9A.2	1	12653322	12674858	20140	13.9346	10.5176	0.754784	0.0994408	10.2052	.	96.1747	6.90188	65.6712	6.24395	.	6.45	0.462878		4.03	0.383168		9.54	0.934816
chrV	WBGene00007754	C27A7.2	1	12138234	12139894	1046	5.85516	2.20459	0.376521	0.00702638	4.21797	.	15.12	2.58234	4.02	1.82347	.	2.47667	0.422989		1.63667	0.742391		0.12	0.0284497
chrIV	WBGene00007761	rad-26	1	8893972	8901372	4783	19.9718	21.5339	1.07822	0.018155	23.5344	.	161.123	8.06755	153.607	7.13326	.	103.44	5.17931		63.6867	2.95751		83.4467	3.54573
chrX	WBGene00007772	egrh-1	1	14841302	14849125	6704	9.78893	11.1891	1.14304	0.0039757	8.11322	.	51.48	5.259	79.0467	7.06459	.	4.57333	0.467194		3.57	0.319059		5.67333	0.699271
chrX	WBGene00007774	C27C12.4	1	14854061	14856452	1683	5.35205	7.23708	1.35221	0.00901762	4.91266	.	15.1333	2.82758	26.13	3.61057	.	2.08333	0.389259		3.87333	0.535207		2.17333	0.442395
chrV	WBGene00007784	ruvb-1	-1	9978767	9980701	1334	17.8201	9.35195	0.524798	0.00113859	17.2661	.	77.8567	4.36904	61.95	6.62429	.	6.56667	0.368498		6.08	0.650132		6.88667	0.398854
chrV	WBGene00007785	C27H6.3	1	9981112	9982740	1028	5.85457	2.54086	0.433995	0.00877682	6.25584	.	25.8433	4.41421	9.11667	3.58803	.	3.57667	0.610919		3.35667	1.32108		7.37333	1.17863
chrV	WBGene00007800	C29A12.6	1	10847347	10852548	4596	5.83834	4.32985	0.741624	0.286948	4.46736	.	10.8867	1.86469	9.44333	2.18098	.	4.94	0.846131		3.12667	0.722119		5.17333	1.15803
chrIV	WBGene00007801	trpa-1	1	11863626	11875715	10240	25.2857	21.2018	0.838487	0.8518	24.0146	.	28.8633	1.14149	44.4333	2.09574	.	3.52	0.139209		3.46333	0.163351		4.70667	0.195991
chrV	WBGene00007807	C29F3.7	1	15354981	15357555	1947	6.53236	11.4813	1.7576	0.0028874	3.79507	.	15.1967	2.32637	36.6833	3.19506	.	0.206667	0.0316374		1.07667	0.0937761		0	0
chrX	WBGene00007811	C29F7.2	1	13415903	13418152	1648	6.68811	21.7643	3.25417	7.28551e-16	7.32221	.	28.0367	4.19202	97.57	4.48304	.	1.61074	0.240836		7.2047	0.331033		1.57718	0.215397
chrIV	WBGene00007824	C30H6.7	1	17380529	17382193	1064	13.1513	7.25188	0.551419	0.0115344	11.7011	.	46.1067	3.50586	42.6	5.87434	.	5.76	0.437979		3.43667	0.4739		4.22667	0.361219
chrII	WBGene00007836	C31C9.2	-1	13636913	13638496	872	63.6422	46.2179	0.726215	0.0975301	79.3825	.	226.854	3.56452	167.323	3.62031	.	11.1433	0.175093		16.04	0.347052		15.0867	0.19005
chrII	WBGene00007837	fbxa-167	1	13641433	13643753	1278	10.117	7.35368	0.726865	0.290686	9.31377	.	82.6711	8.17152	44.5034	6.05185	.	2.95667	0.292248		1.35667	0.184488		1.93333	0.207578
chrX	WBGene00007847	C31E10.6	1	13995973	13999282	2461	6.27164	11.0398	1.76028	1.9725e-07	6.78952	.	25.4737	4.06173	21.9558	1.98878	.	2.18333	0.348128		3.84	0.347832		1.68667	0.248422
chrX	WBGene00007848	C31E10.7	1	14000602	14003000	1623	25.7465	42.6999	1.65848	1.01314e-06	28.4153	.	90.5867	3.51841	184.797	4.3278	.	8.68667	0.337393		21.4233	0.501718		11.9667	0.421135
chrIII	WBGene00007860	C32A3.3	1	3630521	3643654	11687	8.17383	5.2771	0.64561	0.0034854	7.3029	.	64.63	7.90695	38.0067	7.20218	.	1.46333	0.179027		0.936667	0.177496		1.69333	0.231871
chrIV	WBGene00007867	C32H11.4	1	12921282	12923266	1177	10.9235	13.8743	1.27013	0.263693	5.41886	.	27.9	2.55412	39.4029	2.84	.	0.939597	0.0860159		2.5906	0.18672		0.362416	0.0668805
chrX	WBGene00007878	C33A11.2	1	15365436	15369931	3408	13.1658	23.2909	1.76905	5.93992e-13	20.2653	.	42.1967	3.20502	43.7895	1.88011	.	9.18333	0.697515		14.9067	0.64002		6.40667	0.31614
chrIV	WBGene00007880	C33A12.1	-1	9523731	9525075	517	11.3511	8.38588	0.738775	0.481729	13.3675	.	99.9267	8.80329	53.92	6.42986	.	5.28333	0.465448		2.84667	0.33946		5.56	0.415934
chrIV	WBGene00007882	C33A12.3	-1	9510735	9513625	2281	58.6984	46.4969	0.792133	0.473754	48.2006	.	141.796	2.41567	98.0066	2.10781	.	11.7067	0.199438		19.5633	0.420745		8.21333	0.170399
chrIV	WBGene00007885	ugt-21	1	9500293	9502551	1641	3.95551	5.51767	1.39493	0.0224943	2.54479	.	16.5658	4.18802	20.007	3.62598	.	1.70667	0.431465		1.94333	0.352202		0.24	0.0943103
chrIV	WBGene00007886	C33A12.7	-1	9506916	9508739	1223	8.33156	5.79027	0.69498	0.346718	11.3769	.	25.88	3.10626	11.8233	2.04193	.	7.41333	0.889789		8.05333	1.39084		6.75333	0.593598
chrIV	WBGene00007890	C33A12.19	1	9516979	9518418	839	1.39333	6.84625	4.9136	1.4052e-10	0.128725	.	5.63	4.04069	23.5333	3.43741	.	1.81333	1.30144		8.48	1.23864		0.726667	5.64512
chrII	WBGene00007892	C33B4.4	-1	11375588	11376863	675	3.38519	3.99333	1.17965	0.262723	3.57926	.	9.24	2.72954	6.49333	1.62604	.	80.3404	23.7329		44.422	11.124		46.6986	13.047
chrX	WBGene00007904	C33G3.4	1	14071115	14076226	4287	4.72277	5.55703	1.17665	0.0297858	4.17098	.	16.6333	3.52195	22.8433	4.11071	.	4.83333	1.02341		6.43667	1.15829		3.5	0.839131
chrX	WBGene00007906	C33G3.6	-1	14080321	14084382	3398	5.63493	10.3499	1.83674	7.65287e-09	4.76221	.	28.1267	4.99148	82.2	7.9421	.	2.38	0.422365		5.97	0.576817		1.32667	0.278582
chrI	WBGene00007911	C34B7.1	1	8329856	8332712	2251	2.9729	1.67126	0.562164	0.105689	2.86984	.	7.11333	2.39272	6.55333	3.9212	.	4.54	1.52713		2.5	1.49588		5.43333	1.89326
chrIII	WBGene00007921	C34C12.2	1	3456451	3460092	2828	10.6434	7.04385	0.661805	0.0522744	9.94112	.	79.69	7.48728	55.47	7.87496	.	3.57333	0.335733		3.09	0.438681		3.14667	0.31653
chrIII	WBGene00007923	C34C12.4	-1	3467282	3471496	3247	12.5764	9.34694	0.743214	0.190615	13.1149	.	29.7467	2.36528	21.0533	2.25243	.	10.69	0.850006		6.73667	0.720735		5.42667	0.41378
chrIII	WBGene00007924	C34C12.5	1	3471642	3473710	1336	44.8301	35.9607	0.802156	0.567425	41.89	.	74.314	1.65768	75.9767	2.11277	.	17.8167	0.397427		16.0333	0.445857		20.04	0.478396
chrIII	WBGene00007925	C34C12.6	1	3480382	3484835	3787	9.09691	11.4735	1.26125	0.00176028	12.0304	.	84.44	9.28227	108.45	9.45225	.	2.36	0.259429		6.78333	0.591219		0.966667	0.0803522
chrIII	WBGene00007927	C34C12.8	1	3460313	3461583	670	10.3657	6.29328	0.607127	0.0871362	11.7284	.	85.492	8.24761	31.988	5.08288	.	65.82	6.34981		38.9867	6.19496		55.5667	4.7378
chrX	WBGene00007934	C34E7.4	-1	12932169	12934852	2083	15.2124	19.3615	1.27274	0.000742323	13.8296	.	34.2533	2.25167	61.2767	3.16487	.	9.01	0.592279		19.48	1.00612		4.93333	0.356723
chrX	WBGene00007935	C34E11.2	-1	11805310	11814681	8439	2.29719	4.85822	2.11485	8.70966e-12	2.0634	.	4.97667	2.16641	8.08	1.66316	.	0.916667	0.399038		2.29333	0.472052		0.84	0.407096
chrX	WBGene00007939	C34F6.5	-1	11207423	11210407	2384	32.2576	48.7806	1.51222	4.79514e-05	29.9643	.	55.9433	1.73427	94.8333	1.94408	.	22.7167	0.704228		34.8867	0.715175		24.4533	0.816081
chrX	WBGene00007941	C34F6.7	-1	11210830	11215567	3004	8.29943	10.1563	1.22373	0.00410758	9.28628	.	37.51	4.51959	65.7	6.4689	.	1.68333	0.202825		2.25	0.221538		1.56667	0.168708
chrX	WBGene00007943	C34F6.9	-1	11217696	11222978	4680	11.8806	20.5111	1.72644	1.34748e-12	12.8015	.	34.47	2.90138	43.4267	2.11723	.	6.53	0.549638		8.73333	0.425785		6.04	0.47182
chrX	WBGene00007944	C34F6.10	-1	11229537	11248163	17972	16.9323	26.4584	1.5626	6.05803e-14	16.564	.	132.99	7.85421	177.007	6.69	.	6.71141	0.396367		14.2886	0.54004		10.1946	0.615471
chrV	WBGene00007952	C35A5.8	-1	10521966	10526042	3476	14.6543	8.32998	0.568431	0.0164635	13.6565	.	112.07	7.64756	87.0467	10.4498	.	13.2433	0.903714		7.12	0.854744		12.6867	0.928984
chrV	WBGene00007953	hdac-11	1	10526155	10528372	1469	9.54765	3.3162	0.347332	1.60562e-06	6.47039	.	5.8	0.607479	3.78667	1.14187	.	3.59333	0.376358		1.86667	0.562893		1.93333	0.298797
chrX	WBGene00007955	C35C5.3	-1	11545050	11546606	956	28.9341	53.2798	1.84142	1.24155e-12	25.4435	.	210.103	7.26144	288.267	5.41043	.	20.27	0.700557		46.2567	0.868184		18.72	0.735747
chrX	WBGene00007956	C35C5.6	1	11563819	11569464	5039	13.2011	25.2558	1.91315	3.56545e-17	14.5709	.	80.3233	6.08458	188.157	7.45004	.	36.4333	2.75986		50.8267	2.01247		26.0333	1.78666
chrX	WBGene00007959	C35C5.10	1	11553089	11559792	6090	7.82356	12.9081	1.6499	4.48429e-10	6.54598	.	46.9433	6.00025	109.197	8.45953	.	6.58333	0.841475		13.88	1.07529		2.89333	0.442002
chrIII	WBGene00007969	acs-19	1	3863144	3867080	3326	28.9385	37.2127	1.28592	0.00358449	30.5033	.	117.533	4.06148	153.99	4.1381	.	38.1767	1.31923		88.86	2.38789	Y	39.2567	1.28696
chrIII	WBGene00007970	C36A4.10	-1	3829812	3831428	962	116.483	132.72	1.13939	0.000792397	116.214	.	419.259	3.59931	499.5	3.76357	.	50.2733	0.431592		57.8133	0.435604		45.0667	0.387792
chrI	WBGene00007971	rpb-3	1	8728693	8730064	771	16.4948	12.8949	0.781757	0.507987	15.1505	.	118.26	7.16953	40.7867	3.163	.	5.49333	0.333034		4.93333	0.382579		5.08	0.335303
chrI	WBGene00007972	prp-4	-1	8733407	8735884	1842	8.01004	4.42372	0.552272	0.011864	7.82193	.	34.78	4.34205	13.5133	3.05474	.	2.36667	0.295462		2.59667	0.586987		3.26667	0.417629
chrI	WBGene00007976	C36B1.9	-1	8743843	8747967	3361	9.17614	6.05207	0.659544	0.0504574	8.86968	.	14.85	1.61833	14.0867	2.32758	.	6.84667	0.746138		4.68667	0.774391		3.73333	0.42091
chrIII	WBGene00007981	glb-11	-1	3989355	3992366	2371	6.68958	5.94981	0.889414	0.901636	5.50443	.	64.8656	9.69651	72.9624	12.263	.	9.82333	1.46845		6.78333	1.14009		4.58	0.832057
chrIII	WBGene00007982	pxd-1	1	4005683	4009940	3646	18.127	11.955	0.659515	0.0110833	21.6975	.	76.5267	4.2217	72.4033	6.05631	.	11.0633	0.610324		9.65333	0.807471		15.58	0.718056
chrIII	WBGene00007983	C36E8.4	1	4010428	4015742	4571	19.6376	14.0057	0.713207	0.0537795	20.1194	.	94.344	4.80425	108.414	7.74071	.	25.9633	1.32212		22.9433	1.63814		57.58	2.86191
chrI	WBGene00007984	irx-1	-1	9536480	9542431	5343	48.9774	35.96	0.734218	0.0490463	38.0036	.	119.611	2.44218	132.142	3.67469	.	15.0933	0.30817		15.48	0.430478		13.7533	0.361895
chrX	WBGene00007993	C37E2.1	-1	14170793	14173909	2477	10.9308	18.8064	1.7205	4.10214e-09	11.8971	.	48.0467	4.39555	96.9868	5.15711	.	1.58667	0.145156		4.48333	0.238394		4.71333	0.396177
chrX	WBGene00007994	C37E2.2	1	14175651	14178402	1204	11.1989	19.1782	1.7125	1.80942e-05	9.43272	.	73.9422	6.60262	105.634	5.50806	.	6.20667	0.55422		9.34	0.487012		3.26667	0.346312
chrIII	WBGene00008006	tag-325	1	4796243	4802875	5939	18.0615	16.0332	0.887697	0.802526	15.5033	.	129.217	7.15424	129.297	8.06432	.	11.7333	0.649631		8.33	0.519548		9.89333	0.638144
chrIII	WBGene00008019	C38H2.2	1	10379368	10384668	4625	17.9689	13.6912	0.761943	0.197002	14.7691	.	58.24	3.24116	58.0567	4.24042	.	5.99333	0.33354		5.63333	0.411455		5.66667	0.383684
chrIV	WBGene00008034	C39E9.11	-1	13091160	13093788	1777	13.9437	8.56246	0.614073	0.0168317	11.8616	.	38.5519	2.76482	29.0167	3.38882	.	2.78667	0.199851		2.71333	0.316887		2.05333	0.173108
chrIV	WBGene00008035	C39E9.12	1	13093899	13095467	968	12.297	8.29029	0.674171	0.178014	16.9597	.	76.2867	6.20368	39.9367	4.81728	.	2.00667	0.163183		1.66	0.200234		2.66	0.156842
chrIII	WBGene00008078	C44B9.1	1	10869119	10874541	4141	9.88988	6.13137	0.619964	0.00966998	10.5455	.	46.784	4.73049	44.0333	7.18165	.	4.72	0.477255		2.63333	0.429485		4.46667	0.423561
chrIII	WBGene00008081	athp-1	1	10882156	10893575	9634	7.95428	6.39605	0.804101	0.520429	5.58916	.	42.3	5.31789	51.5652	8.06205	.	5.21667	0.655832		2.67667	0.418488		2.78	0.497391
chrX	WBGene00008085	C44C10.4	1	11693213	11695682	1869	6.02675	7.3962	1.22723	0.0393053	5.60942	.	13.1	2.17364	19.6667	2.65902	.	4.60667	0.76437		3.98667	0.539015		5.66667	1.01021
chrX	WBGene00008094	C44H4.4	-1	14568787	14589147	18813	12.5761	19.3472	1.5384	6.80553e-13	11.3676	.	97.6567	7.76525	198.807	10.2758	.	8.38	0.666342		13.04	0.674001		6.14667	0.540717
chrV	WBGene00008102	C44H9.7	-1	12852998	12854796	1198	8.82304	9.91444	1.1237	0.13306	3.69115	.	26.7	3.02617	29.2233	2.94755	.	2.58667	0.293172		3.61	0.364115		3.14	0.850683
chrI	WBGene00008107	aspm-1	-1	9221819	9226820	4389	6.52427	3.50638	0.537437	0.00138018	6.14833	.	76.45	11.7178	53.8267	15.3511	.	1.36667	0.209474		0.486667	0.138795		0.48	0.07807
chrIV	WBGene00008110	C46C2.2	1	9216697	9220381	3024	55.3191	46.5556	0.841582	0.870557	52.7363	.	95.85	1.73267	112.863	2.42427	.	22.2167	0.401609		22.2367	0.477637		18.6	0.352698
chrIII	WBGene00008117	gsr-1	1	3650924	3653136	1612	17.602	18.6495	1.05951	0.0778613	31.8573	.	87.6833	4.98143	78.39	4.20333	.	7.81	0.443698		9.84	0.527628		11.5933	0.363914
chrIII	WBGene00008119	C46F11.4	-1	3657695	3664374	5362	9.03972	6.04327	0.668523	0.0279243	9.80026	.	51.4833	5.69523	52.7667	8.73148	.	3.02333	0.33445		6.66	1.10205		9.30667	0.949635
chrIII	WBGene00008121	C46F11.6	-1	3667333	3677506	9385	32.719	26.6129	0.81338	0.470332	28.5007	.	104.617	3.19743	107.56	4.04166	.	22.0067	0.672597		13.9533	0.524306		15.5533	0.545718
chrI	WBGene00008132	gale-1	1	12973383	12978770	3848	12.8623	9.26468	0.720299	0.0990441	14.6757	.	101.153	7.86435	72.3733	7.81174	.	18.9533	1.47356		22.4167	2.41958		24.9	1.69669
chrII	WBGene00008136	C47D12.2	1	11676118	11679370	2497	19.7401	10.5164	0.532744	3.94717e-05	15.9063	.	70.0567	3.54895	54.6233	5.1941	.	4.11	0.208206		2.11	0.200639		3.26	0.20495
chrV	WBGene00008143	C47E8.4	-1	14683656	14685664	1408	13.0543	10.3274	0.79111	0.584316	15.2926	.	41.4767	3.17723	48.65	4.71076	.	1.29	0.0988178		2.84667	0.275642		1.44667	0.094599
chrV	WBGene00008145	set-5	1	14697294	14707581	9251	1.39444	1.14182	0.818837	0.779352	1.32861	.	6.51027	4.66872	4.78082	4.18701	.	25.6879	18.4216		22.1644	19.4114		20.5235	15.4473
chrIV	WBGene00008151	C47E12.7	-1	9980703	9982501	1198	16.3677	8.08598	0.49402	0.000312761	15.601	.	84.5	5.16261	51.54	6.374	.	4.7637	0.291043		2.74315	0.339248		1.60274	0.102733
chrIV	WBGene00008156	C47E12.13	-1	10005549	10007816	1629	6.24524	4.29405	0.687571	0.608784	5.9337	.	12.7867	2.04743	9.44257	2.19899	.	4.3	0.688524		4.50667	1.04952		6.27333	1.05724
chrII	WBGene00008165	C47G2.4	-1	11290781	11293475	2091	16.4651	13.7145	0.832944	0.820944	14.9144	.	73.261	4.44948	92.0074	6.70877	.	5.44	0.330396		5.55333	0.404925		5.44	0.364748
chrII	WBGene00008166	saps-1	1	11297420	11301198	3173	22.9852	15.012	0.653115	0.0241451	25.0139	.	87.64	3.81289	81.5367	5.43144	.	6.29333	0.2738		4.09667	0.272893		5.92	0.236669
chrIII	WBGene00008168	C48B4.3	-1	9580558	9586056	4843	17.0414	14.3231	0.840491	0.80319	13.0624	.	48.4094	2.8407	57.3684	4.00529	.	16.4533	0.965492		32.02	2.23554	Y	13.6267	1.0432
chrIV	WBGene00008177	C48D1.1	-1	13193643	13197411	3075	11.9167	7.95333	0.667408	0.0530816	10.6514	.	22.5432	1.89172	30.5325	3.83895	.	3.60714	0.302695		2.93304	0.368781		3.875	0.363803
chrV	WBGene00008183	tag-333	-1	14784137	14816295	31008	30.5779	21.174	0.692461	0.0624979	23.4554	.	334.807	10.9493	400.15	18.8981	.	8.93	0.292041		6.94333	0.327917		4.45333	0.189864
chrI	WBGene00008191	C49A1.10	-1	14241885	14245165	2458	9.32181	6.00814	0.644525	0.0505628	6.29455	.	36.0233	3.86442	41.02	6.82741	.	2.78667	0.298941		1.94	0.322895		1.56667	0.248893
chrIV	WBGene00008195	C49C3.5	1	17329045	17330702	1057	10.8974	14.6116	1.34084	0.00305782	13.2498	.	53.9033	4.94646	55.3859	3.79053	.	7.33667	0.673252		4.50667	0.30843		8.55333	0.645546
chrIV	WBGene00008198	C49C3.8	1	17335237	17336648	811	16.0943	10.2713	0.638192	0.328842	12.3699	.	60.7533	3.77483	43.37	4.22246	.	64.1867	3.98815		46.81	4.55737		45.4867	3.6772
chrIV	WBGene00008204	C49C3.15	1	17333720	17335052	732	30.1769	32.1414	1.0651	0.203195	46.4536	.	82.68	2.73984	70.0267	2.17871	.	46.0407	1.52569		33.1707	1.03203		52.4472	1.12902
chrX	WBGene00008205	sams-1	1	11965920	11969716	3100	36.5753	65.6137	1.79393	2.08184e-18	32.7771	.	13.15	0.359532	17.6567	0.2691	.	9.90667	0.270857		40.7367	0.620856		9.16667	0.279667
chrX	WBGene00008215	C49F8.3	-1	13385991	13390453	3641	17.8478	25.8378	1.44767	7.5659e-08	10.9437	.	52.4533	2.93892	83.5133	3.23221	.	3.33333	0.186764		10.9033	0.421991		1.68667	0.154122
chrV	WBGene00008218	nasp-2	-1	13310171	13313148	2377	6.49264	3.2093	0.494298	0.00301144	8.02819	.	12.6206	1.94383	5.73759	1.7878	.	9.36667	1.44266		8.99	2.80124		25.8733	3.22281
chrV	WBGene00008221	nhr-168	-1	13331102	13335261	3557	8.64057	4.69637	0.543526	0.00387965	8.01855	.	57.1467	6.61376	32.9367	7.01321	.	2.09	0.241882		1.21	0.257646		2.41333	0.300969
chrV	WBGene00008224	C50B8.1	1	13565496	13566946	800	23.7025	23.3144	0.983625	0.34948	26.47	.	121.16	5.1117	143.493	6.15471	.	10.9867	0.463524		9.71667	0.416767		6.28	0.23725
chrV	WBGene00008225	C50B8.3	-1	13566921	13568644	1116	7.63575	4.50851	0.590448	0.0697599	8.1819	.	21.68	2.83927	20.0533	4.44788	.	1.98667	0.26018		1.95	0.432515		0.84	0.102666
chrV	WBGene00008226	C50B8.4	1	13572036	13573409	773	8.73157	12.9398	1.48196	0.00262779	7.64812	.	46.7629	5.35561	58.1133	4.49104	.	3.61333	0.413824		3.12667	0.241631		4.47333	0.584893
chrV	WBGene00008227	C50B8.5	1	13580968	13584668	2892	3.69035	4.65906	1.2625	0.0350338	3.08783	.	34.22	9.27283	52.0067	11.1625	.	36.2733	9.82923		53.7467	11.5359		35.6533	11.5464
chrV	WBGene00008237	C50F4.14	-1	9547584	9550464	2232	10.9388	8.84834	0.808892	0.71996	11.8978	.	82.4423	7.53666	60.4872	6.83599	.	2.39667	0.219097		3.12333	0.352985		2.17333	0.182666
chrV	WBGene00008254	C51E3.9	1	10145915	10148953	2436	6.69684	4.02073	0.600392	0.0411021	4.39696	.	15.79	2.35783	11.1567	2.77479	.	3.22	0.480824		0.833333	0.207259		0.48	0.109166
chrV	WBGene00008259	C52E4.7	1	11993920	11995820	1300	1.46577	0.572692	0.390711	0.232465	1.47462	.	0.613333	0.418438	0.45	0.785762	.	2.19333	1.49637		2.39667	4.18491		2.77333	1.88072
chrX	WBGene00008260	C52G5.2	1	12843266	12845314	1376	10.4971	22.8419	2.17602	6.77377e-13	10.4448	.	30.6833	2.92303	61.5467	2.69446	.	8.66	0.82499		14.27	0.624728		4.94	0.472964
chrV	WBGene00008266	C53A5.6	-1	14543661	14546009	1740	16.4928	9.46552	0.573918	0.00333563	14.8609	.	37.3467	2.26442	31.5533	3.3335	.	20.5167	1.24398		19.64	2.0749		23.08	1.55307
chrIV	WBGene00008273	C53B4.3	-1	8970530	8973652	2514	6.03341	3.34228	0.553962	0.011085	5.21758	.	19.6033	3.24913	9.50694	2.84445	.	1.3	0.215467		0.626667	0.187497		1.81333	0.347543
chrIV	WBGene00008274	C53B4.4	1	8973784	8984554	9789	12.4964	9.28767	0.743229	0.104603	13.2918	.	109.777	8.78468	81.5633	8.78189	.	5.66667	0.453465		3.02333	0.325521		3.62667	0.272851
chrIV	WBGene00008281	C53D6.4	-1	9019160	9021408	1620	9.17932	4.84352	0.527655	0.00413988	7.26235	.	21.4067	2.33205	9.84667	2.03296	.	2.80797	0.305902		1.35507	0.27977		1.97101	0.271402
chrIV	WBGene00008283	C53D6.6	-1	9027665	9032638	2829	6.30735	4.41852	0.700535	0.134256	6.22517	.	45.0067	7.13559	38.3067	8.66956	.	2.49333	0.395306		1.24667	0.282146		2.41333	0.387674
chrIII	WBGene00008288	C54C6.6	-1	3534638	3537498	2018	12.5161	10.5176	0.840325	0.917997	12.559	.	53.55	4.27849	51.9633	4.94061	.	107.637	8.59985		149.99	14.2609		130.177	10.3652
chrV	WBGene00008309	nhr-170	-1	18796042	18800916	2093	3.26875	3.86503	1.18242	0.0705365	2.31438	.	24.372	7.45605	30.7938	7.9673	.	1.11667	0.341619		1.41667	0.366535		0.966667	0.417678
chrI	WBGene00008314	C54G4.4	-1	7996723	8002980	5650	3.93531	2.89265	0.735051	0.320566	3.38796	.	15.6333	3.97258	16.5267	5.71332	.	0.49	0.124514		1.49667	0.517402		1.81333	0.535228
chrV	WBGene00008320	C54G10.4	-1	14653430	14658133	4039	4.39304	4.74808	1.08082	0.108799	4.83362	.	6.38333	1.45306	4.66333	0.982151	.	2.52	0.573634		4.30333	0.906331		2.05333	0.424802
chrV	WBGene00008338	C55A6.9	1	11521663	11523406	1143	11.7979	6.20604	0.526029	0.00611043	10.252	.	48.9267	4.14707	29.92	4.82111	.	9.08333	0.769911		4.13667	0.666555		8.7	0.848618
chrV	WBGene00008343	C56A3.4	-1	13550506	13551750	644	4.25233	4.09472	0.962936	0.627845	3.00155	.	31.2767	7.35519	15.9757	3.90154	.	4.41667	1.03865		3.19333	0.779866		3.02	1.00615
chrV	WBGene00008344	C56A3.5	1	13551846	13553580	1134	7.47972	3.24339	0.433624	0.00189578	6.79189	.	19.75	2.64047	9.12	2.81188	.	0.69	0.0922495		0.243333	0.0750245		0.36	0.0530044
chrV	WBGene00008345	C56A3.6	-1	13553359	13556795	2681	16.342	9.62458	0.588946	0.00137676	14.7788	.	60.2933	3.68946	55.6233	5.7793	.	5.79667	0.354709		3.54667	0.368501		3.74667	0.253516
chrIV	WBGene00008362	cfim-2	1	8926212	8930302	3457	48.1433	36.6238	0.760724	0.59138	77.6083	.	113.28	2.35297	92.85	2.53524	.	8.20333	0.170394		4.37333	0.119412		3.86667	0.0498228
chrX	WBGene00008369	D1053.4	-1	11721658	11724716	2457	11.3325	14.6329	1.29123	0.000712102	7.88075	.	70.74	6.24221	61.32	4.19056	.	6.46333	0.570335		8.13333	0.555826		2.28667	0.290159
chrV	WBGene00008370	D1054.1	-1	10768425	10770198	1017	12.8943	6.49459	0.503679	0.00159496	11.648	.	17.5667	1.36236	11.3267	1.74402	.	1.49667	0.116072		1.18	0.18169		0.726667	0.0623856
chrI	WBGene00008386	D1081.8	1	8491037	8495832	3731	11.1187	8.00322	0.719796	0.366765	10.3332	.	80.9267	7.27841	106.78	13.3421	.	24.9033	2.23976		31.4033	3.92384		18.6933	1.80906
chrII	WBGene00008402	wdfy-2	1	9319542	9321986	1374	10.4774	6.89884	0.658447	0.107265	11.2103	.	46.0533	4.39548	29.8533	4.3273	.	1.92	0.183251		2.95	0.427608		2.17333	0.193869
chrV	WBGene00008409	D2023.5	-1	11825870	11827196	723	4.49378	3.6148	0.804401	0.839164	3.89903	.	42.9133	9.5495	23.61	6.53148	.	1.21333	0.270003		1.07	0.296005		0	0
chrV	WBGene00008410	D2023.6	1	11827311	11829351	1440	4.11181	2.12778	0.51748	0.0500909	3.41111	.	17.6333	4.28846	8.37333	3.93525	.	0.303333	0.0737713		0.45	0.211488		0.24	0.0703583
chrI	WBGene00008411	D2030.1	-1	7567817	7571215	2795	7.84615	4.42236	0.563634	0.00872566	8.13596	.	29.6933	3.78444	22.64	5.11944	.	3.62	0.461373		3.88667	0.878867		9.15333	1.12505
chrI	WBGene00008415	mce-1	1	7581939	7583364	824	21.7227	18.909	0.870471	0.948261	21.193	.	85.7867	3.94917	93.05	4.92094	.	11.12	0.511907		8.4	0.444233		8.34	0.393527
chrI	WBGene00008419	wdr-23	1	7595588	7602199	5870	44.8644	48.747	1.08654	0.0439469	43.0345	.	143.907	3.20759	234.913	4.81903	.	30.9833	0.6906		28.7833	0.590463		24.2133	0.562649
chrIII	WBGene00008422	D2045.2	-1	10452584	10460608	5813	7.94203	4.75503	0.598718	0.00318446	8.34182	.	133.71	16.8358	118.513	24.9238	.	2.74	0.345		1.32	0.277601		1.08667	0.130267
chrIII	WBGene00008426	D2045.9	1	10475313	10479656	3257	18.0203	12.2069	0.677401	0.0213815	15.915	.	37.7033	2.09227	29.4333	2.4112	.	103.217	5.72781		54.5233	4.46659		88.02	5.53065
chrII	WBGene00008428	D2085.3	1	8661722	8664672	2328	13.2008	8.64068	0.654556	0.0406168	11.9579	.	90.98	6.892	86.84	10.0501	.	5.75333	0.435832		2.95	0.341408		6.40667	0.535768
chrII	WBGene00008436	DH11.2	1	8012745	8015203	1852	27.5283	25.382	0.922032	0.504174	25.9951	.	47.6213	1.7299	46	1.81231	.	8.90625	0.32353		10.9549	0.431599		5.65972	0.217722
chrI	WBGene00008439	mfb-1	-1	8779731	8786817	5637	17.9965	13.4769	0.748863	0.247542	14.7158	.	92.64	5.14766	64.1567	4.76048	.	7.71333	0.428601		6.13667	0.455346		6.86667	0.466618
chrV	WBGene00008441	E01B7.1	1	17924889	17934201	6957	10.6284	11.2799	1.0613	0.02745	10.2205	.	41.5988	3.91392	37.3511	3.31128	.	11.2043	1.05418		4.03226	0.357472		11.0645	1.08258
chrI	WBGene00008476	E03H4.8	-1	12424545	12426861	959	16.231	16.5047	1.01686	0.587567	16.7461	.	24.28	1.49591	29.8767	1.81019	.	2.8797	0.17742		1.96241	0.1189		3.13534	0.187228
chrI	WBGene00008477	clec-17	-1	12430019	12431453	781	2.62036	7.07234	2.699	5.96228e-06	3.23816	.	6.40157	2.44301	15.9858	2.26033	.	0.2	0.0763254		0.87	0.123014		0.24	0.0741163
chrII	WBGene00008480	E04D5.1	1	10416660	10419358	1794	14.9797	12.5348	0.836791	0.850136	15.6522	.	67.2367	4.48853	64.5533	5.14991	.	4.69667	0.313536		7.71333	0.615352		4.22667	0.270037
chrIV	WBGene00008488	F01D4.5	-1	10482605	10483846	641	10.2332	5.48986	0.536474	0.0347427	8.63339	.	26.1007	2.55059	13.1483	2.39501	.	1.88333	0.184041		2.28667	0.416526		1.81333	0.210037
chrII	WBGene00008496	F01D5.6	1	14004983	14008502	2780	30.5664	24.0392	0.786459	0.365532	23.9493	.	122.4	4.0044	79.915	3.32436	.	12.3233	0.403166		11.16	0.464242		6.38	0.266396
chrIV	WBGene00008506	tkt-1	1	10243474	10245730	1655	15.5251	15.3172	0.986612	0.269403	19.8846	.	45.4833	2.92967	49.8667	3.2556	.	7.26	0.467631		8.82333	0.57604		9.41333	0.473398
chrIV	WBGene00008510	lipl-7	-1	10239256	10241833	1977	15.2886	13.9982	0.915601	0.787839	11.8366	.	70.4167	4.60584	45.2	3.22898	.	3.11333	0.203638		3.74333	0.267415		1.44667	0.12222
chrIII	WBGene00008514	F02A9.4	-1	9084237	9089510	4653	17.2375	10.626	0.61645	0.00105073	17.2224	.	114.997	6.67131	78.6333	7.40005	.	3.30667	0.19183		2.19	0.206097		5.56	0.322835
chrX	WBGene00008519	cyp-13B1	-1	13406607	13409574	2358	5.7025	21.2706	3.73004	6.21351e-28	6.98304	.	25.3733	4.44951	55.8067	2.62366	.	1.85517	0.325326		9.08621	0.427173		4.87586	0.698244
chrI	WBGene00008530	F02E9.5	-1	8424993	8426859	1254	44.0052	32.5857	0.740497	0.192752	39.8907	.	221.777	5.03979	165.297	5.07267	.	112.473	2.55591		45.5933	1.39918		56.58	1.41837
chrI	WBGene00008531	F02E9.7	1	8413032	8416190	2551	8.34633	5.78675	0.693328	0.15379	6.94394	.	42.07	5.04054	24.15	4.17333	.	8.8	1.05436		5.32333	0.919918		12.3333	1.77613
chrIV	WBGene00008538	sqrd-1	1	14219893	14224415	3743	34.7911	27.6841	0.795723	0.531539	37.8967	.	85.5724	2.45961	62.8412	2.26994	.	11.2233	0.322592		17.9533	0.648508		10.0267	0.264579
chrI	WBGene00008543	F07A5.4	-1	7357178	7359430	1651	4.49849	4.95578	1.10166	0.20669	3.11569	.	11.49	2.55419	13.7367	2.77185	.	2.71	0.602425		3.22333	0.650418		1.08	0.346633
chrII	WBGene00008547	F07A11.4	1	11602821	11611466	7970	12.5786	11.0221	0.876261	0.836001	9.81167	.	62.524	4.97066	69.6849	6.32227	.	7.1	0.56445		5.62	0.509883		4.58	0.466791
chrII	WBGene00008549	din-1	-1	11614572	11634987	19582	60.4118	58.3542	0.96594	0.138719	63.8963	.	367.31	6.0801	372.703	6.38692	.	36.3933	0.602421		42.4767	0.727911		42.4433	0.664254
chrX	WBGene00008571	F08B12.1	1	11384858	11392715	7250	12.4908	27.9159	2.23492	5.00054e-27	12.3266	.	68.4233	5.47792	135.26	4.84527	.	12.14	0.971919		24.22	0.867607		10.98	0.890755
chrX	WBGene00008585	F08G12.1	-1	11302010	11306724	4114	17.9852	23.4983	1.30654	1.34347e-05	19.5438	.	44.24	2.4598	91.11	3.8773	.	12.2333	0.68019		25.1067	1.06845		11.6867	0.597975
chrX	WBGene00008586	F08G12.2	-1	11298015	11299609	991	26.496	43.9309	1.65802	2.25419e-09	30.0323	.	139.74	5.27401	177.037	4.02989	.	17.0133	0.64211		37.6267	0.856497		19.0733	0.635094
chrX	WBGene00008587	F08G12.3	1	11299833	11302553	2120	8.68892	9.44198	1.08667	0.239738	10.9123	.	17.6833	2.03516	13.5949	1.43984	.	22.9767	2.64437		39.4167	4.17462		63.5	5.81914
chrX	WBGene00008588	F08G12.5	-1	11308839	11310278	839	11.0405	17.6484	1.59851	7.10066e-05	7.70203	.	63.8167	5.78022	81.2533	4.60401	.	5.94667	0.538622		4.38	0.248181		2.77333	0.360078
chrX	WBGene00008600	F09A5.3	1	13141686	13152404	9977	4.77699	6.6517	1.39245	0.0723382	5.6073	.	0.593333	0.124207	1.39333	0.20947	.	5.26	1.10111		7.69667	1.1571		4.82	0.859594
chrX	WBGene00008604	F09B9.5	1	10152859	10156797	3326	6.05833	16.1114	2.65938	1.28898e-19	6.64823	.	5.21333	0.860523	10.8	0.670333	.	66.39	10.9585		164.207	10.192		68.1333	10.2483
chrX	WBGene00008606	dhhc-1	-1	15097997	15100606	1892	19.9728	28.311	1.41748	3.40943e-06	18.3356	.	57.1433	2.86106	85.9467	3.0358	.	6.90667	0.345804		6.27667	0.221704		6.4	0.349047
chrX	WBGene00008609	F09B12.5	1	15084010	15088065	3038	1.10369	1.06287	0.963018	0.73045	0.994075	.	2.39333	2.16849	2.5	2.35212	.	3.44667	3.12287		5.56	5.23112		4.82667	4.85543
chrI	WBGene00008613	fbxb-69	-1	14283452	14285333	1126	7.60702	7.00888	0.921371	0.740816	6.66341	.	38.1899	5.02035	44.4557	6.34277	.	5.48944	0.721628		4.94014	0.70484		2.66901	0.400548
chrX	WBGene00008622	F09C8.2	-1	16140948	16150167	8138	49.2338	78.8571	1.60168	5.98746e-16	59.4734	.	143.309	2.91078	392.983	4.98349	.	13.8867	0.282055		40.5633	0.51439		22.8267	0.383813
chrIV	WBGene00008624	F09E8.2	-1	13150528	13154391	3025	7.86198	5.37719	0.683948	0.0907	7.3762	.	73.88	9.39712	54.6533	10.1639	.	7.15667	0.910288		5.55667	1.03338		2.65333	0.359716
chrII	WBGene00008641	pch-2	1	8158173	8159876	1103	12.5585	5.80961	0.462605	0.000494589	9.86854	.	34.7967	2.77077	19.5933	3.37257	.	22.28	1.7741		18.7333	3.22454		13.14	1.3315
chrI	WBGene00008648	F10D11.2	-1	8435956	8438604	2013	14.2298	7.52086	0.528531	0.00073006	11.6692	.	93.39	6.56301	29.4967	3.92198	.	6.75	0.474358		6.59667	0.877115		4.83333	0.414198
chrIII	WBGene00008655	lips-3	1	4616538	4618868	1729	15.0414	10.7788	0.716609	0.168666	11.284	.	53.4033	3.55043	36.14	3.35289	.	4.94333	0.32865		3.44333	0.319455		1.56667	0.13884
chrI	WBGene00008666	F10G8.8	-1	10050682	10069871	17912	27.4848	16.9669	0.61732	0.0132543	19.3773	.	189.092	6.8799	146.894	8.65767	.	8.59	0.312537		5.73333	0.337912		7.6	0.392211
chrV	WBGene00008670	F11A3.2	1	9513848	9517550	3056	10.9665	5.94666	0.542259	0.000609412	9.80334	.	56.64	5.16484	31.0667	5.22422	.	4.56	0.415813		2.78333	0.46805		7.13333	0.727643
chrIV	WBGene00008682	lex-1	1	12079139	12084338	4596	18.9843	19.2486	1.01392	0.141935	22.1088	.	93.4133	4.92055	107.46	5.58275	.	13.02	0.685829		15.3567	0.797808		14.2667	0.645294
chrIV	WBGene00008686	F11A10.5	1	12094096	12096663	1967	25.3551	14.9723	0.590504	0.00112157	23.3726	.	84.6033	3.33674	58.07	3.8785	.	13.9367	0.549659		7.33	0.489571		7.72667	0.330586
chrIV	WBGene00008687	F11A10.6	-1	12086995	12089039	1355	19.3494	11.4838	0.593493	0.00497977	23.1661	.	37.83	1.95509	21.2267	1.84841	.	118.243	6.11094		128.567	11.1955		125.737	5.42763
chrIV	WBGene00008720	F12F6.1	1	11584211	11588298	3487	33.9488	32.188	0.948133	0.327175	39.7552	.	67.5733	1.99045	58.4967	1.81734	.	111.873	3.29535		73.83	2.29371		148.3	3.73033
chrIV	WBGene00008729	F13B12.1	-1	10422591	10425225	2025	12.3106	8.04247	0.653295	0.06111	13.0553	.	90.7367	7.3706	53.0333	6.59416	.	5.99	0.486572		5.72	0.711224		6.40667	0.490733
chrIV	WBGene00008732	F13B12.4	-1	10444589	10450431	5221	13.5956	13.979	1.0282	0.517596	11.894	.	23.5267	1.73046	17.372	1.24272	.	3.69333	0.271657		5.1	0.364832		2.54	0.213553
chrIV	WBGene00008733	F13B12.6	-1	10414052	10422324	7599	33.1384	29.372	0.886345	0.72917	32.5647	.	135.031	4.07476	131.287	4.46979	.	44.8533	1.35352		18.1467	0.617821		34.8333	1.06967
chrX	WBGene00008745	F13E6.1	-1	10675636	10678351	2114	35.5189	69.3013	1.95111	6.22903e-20	36.9444	.	137.363	3.86733	307.567	4.43811	.	14.55	0.409641		27.98	0.403744		20.66	0.559218
chrX	WBGene00008748	F13E6.4	1	10690159	10694397	3636	13.6328	25.7693	1.89023	4.77003e-15	11.3564	.	49.79	3.65221	112.203	4.35416	.	9.94	0.729122		20.85	0.809104		7.23333	0.636937
chrIV	WBGene00008760	F13E9.11	-1	10865247	10869075	3228	73.6597	66.2898	0.899947	0.546915	66.2159	.	248.283	3.37068	286.49	4.32178	.	28.5867	0.388091		29.5833	0.446273		33.08	0.499578
chrI	WBGene00008766	F13G3.6	-1	7303343	7304771	828	10.2814	7.5471	0.734054	0.42365	10.2862	.	104.103	10.1254	37.4933	4.96791	.	2.56333	0.249318		2.43333	0.32242		1.32667	0.128975
chrI	WBGene00008767	F13G3.7	1	7304915	7307004	1489	19.9238	13.7757	0.69142	0.0870424	19.1941	.	92.6733	4.65139	59.7733	4.33905	.	12.34	0.619361		6.65	0.482734		9.18667	0.47862
chrIV	WBGene00008775	F13H10.4	-1	11016204	11021704	4895	6.3239	3.98008	0.629371	0.0226435	6.9428	.	64.89	10.2611	33.0833	8.31222	.	2.17333	0.34367		1.97667	0.49664		3.86667	0.556932
chrIV	WBGene00008776	F13H10.5	1	10989588	10994116	3910	10.5283	8.4821	0.80565	0.539471	7.9289	.	61.48	5.83952	45.0967	5.31669	.	5.85333	0.555964		4.26333	0.502627		1.32	0.16648
chrIV	WBGene00008777	F13H10.6	1	11006608	11009956	2677	10.1375	21.7678	2.14727	1.69271e-16	6.64587	.	97.1467	9.58293	145.573	6.68754	.	2.29667	0.226552		6.66667	0.306262		1.32667	0.199623
chrI	WBGene00008779	F14B4.1	-1	9265944	9270927	4237	12.6581	9.30717	0.735272	0.120703	11.3665	.	25.1842	1.98957	31.4091	3.37472	.	4.11	0.324692		3.78333	0.406496		4.46	0.39238
chrI	WBGene00008781	F14B4.3	-1	9280954	9286686	5078	9.81016	5.50197	0.560844	0.000301579	8.46672	.	73.6333	7.50582	62.7733	11.4092	.	4.78333	0.48759		2.95	0.536172		2.17333	0.256691
chrI	WBGene00008782	sdz-14	-1	12216240	12217757	917	4.96619	3.94493	0.794357	0.705969	4.83642	.	17.5269	3.52925	15.5697	3.94676	.	5.45667	1.09876		5.55333	1.40771		7.36	1.52179
chrI	WBGene00008784	F14B6.3	1	12230523	12232299	983	4.79552	4.05086	0.844718	0.872147	4.41607	.	17.6992	3.69079	15.0263	3.70941	.	2.68	0.558854		3.18667	0.786663		3.02667	0.685375
chrI	WBGene00008787	F14B6.6	1	12232640	12235095	1724	2.62703	2.2616	0.860896	0.955793	2.41357	.	6.11765	2.32873	6	2.65299	.	9.31667	3.54646		3.53333	1.56232		6.74667	2.7953
chrII	WBGene00008800	F14E5.2	-1	8423900	8429023	4381	25.1938	15.4652	0.613849	0.00697994	22.7196	.	37.3896	1.48408	26.8026	1.73309	.	29.52	1.17172		23.7367	1.53484		29.9733	1.31927
chrII	WBGene00008803	lips-10	1	8439105	8442101	2392	10.3359	10.8769	1.05234	0.187728	6.13671	.	28.0233	2.71126	26.98	2.48049	.	3.43	0.331853		4.09667	0.37664		0.24	0.0391089
chrX	WBGene00008805	git-1	1	10524677	10528375	3070	18.9197	32.0155	1.69218	2.21278e-12	17.3759	.	78.7467	4.16215	135.03	4.21765	.	9.13333	0.482742		17.79	0.555669		7.23333	0.416285
chrX	WBGene00008806	mboa-7	-1	10521738	10524561	2223	7.46941	8.95614	1.19904	0.0279405	6.95547	.	28.4733	3.81199	46.9133	5.23812	.	2.68	0.358797		3.48	0.38856		1.92667	0.277
chrV	WBGene00008832	obr-2	-1	15011853	15015933	3400	16.8941	12.476	0.738484	0.18161	15.2835	.	52.6633	3.11726	43.3933	3.47814	.	8.52333	0.504515		8.05333	0.645505		7.36667	0.482
chrII	WBGene00008838	F15A4.2	1	12462463	12464018	707	14.1075	19.2546	1.36485	0.00131431	17.9675	.	69.4767	4.9248	53.1	2.75778	.	6.83566	0.484541		13.6713	0.710029		7.72028	0.429681
chrII	WBGene00008847	fbxb-102	1	12482842	12484215	752	8.83777	10.7055	1.21133	0.0762535	10.3564	.	34.5767	3.91238	35.9033	3.35374	.	2.99	0.338321		5.04333	0.4711		3.99333	0.385592
chrV	WBGene00008851	F15B9.8	1	12987238	12992171	4295	34.731	26.26	0.756096	0.19413	23.2787	.	114.497	3.29667	71.1567	2.7097	.	6.73667	0.193967		5.73	0.218203		3.98	0.170972
chrI	WBGene00008852	F15C11.2	1	7021970	7029075	6390	27.9071	43.464	1.55745	3.11016e-11	43.6279	.	128.457	4.60301	188.243	4.33102	.	23.2667	0.833718		34.1567	0.785861		28.2533	0.647598
chrI	WBGene00008856	F15D3.6	-1	11572081	11577545	4345	24.2059	18.5643	0.766935	0.233005	24.6789	.	56.1467	2.31955	69.8667	3.76349	.	10.8833	0.449615		12.5333	0.67513		14.3733	0.582413
chrI	WBGene00008857	F15D3.7	1	11578404	11579603	599	23.4324	16.9649	0.723995	0.257363	27.4057	.	99.5263	4.24738	65.4408	3.85741	.	9.41034	0.401596		4.41724	0.260375		13.131	0.479136
chrX	WBGene00008865	F15G9.1	1	9704641	9708507	3254	12.5951	20.1423	1.59921	6.02162e-09	11.4978	.	29.3348	2.32906	43.6867	2.1689	.	6.40667	0.508663		21.82	1.08329		5.42667	0.471972
chrI	WBGene00008878	ppfr-1	-1	9364167	9390212	23178	36.7084	28.0654	0.764549	0.385994	30.4314	.	108.363	2.952	151.917	5.41296	.	17.0733	0.465107		12.0333	0.428761		13.6533	0.448659
chrX	WBGene00008880	F16B12.4	-1	14095674	14098718	1938	14.2216	35.0343	2.46345	3.73996e-24	15.9463	.	68.6967	4.83044	118.303	3.37678	.	7.03401	0.4946		13.2211	0.377375		7.14286	0.447931
chrX	WBGene00008882	F16B12.6	1	14102210	14107846	5020	13.0999	18.7202	1.42904	2.42837e-07	14.9448	.	133.54	10.194	328.587	17.5525	.	3.69667	0.28219		7.80667	0.417018		3.50667	0.234641
chrX	WBGene00008883	F16B12.7	1	14108168	14109645	877	7.34664	7.57811	1.03151	0.576285	12.0388	.	2.65517	0.361413	4.95977	0.654487	.	98.8333	13.4529		160.073	21.1231		99.94	8.30151
chrI	WBGene00008887	F16D3.4	-1	8363948	8369753	5172	13.0361	9.12684	0.700122	0.0495681	12.8449	.	83.98	6.44213	77.8233	8.52687	.	6.28	0.481741		5.96	0.653019		4.10667	0.319711
chrX	WBGene00008904	F17A2.13	1	12320946	12322925	1379	9.67984	13.64	1.40911	0.000825482	10.351	.	38.4767	3.97493	66.3333	4.86316	.	3.40667	0.351934		8.36333	0.61315		2.89333	0.279523
chrV	WBGene00008913	F17C11.1	1	10940985	10942870	1285	49.6591	34.8019	0.700816	0.333423	45.177	.	106.123	2.13704	74.2033	2.13216	.	28.2	0.567871		22.5567	0.648144		24.7267	0.547328
chrV	WBGene00008915	F17C11.4	1	10951973	10953462	876	8.64212	6.29966	0.728948	0.3903	6.66895	.	51.23	5.92794	38.2967	6.07917	.	4.55333	0.526877		7.38333	1.17202		6.63333	0.994659
chrV	WBGene00008919	vps-36	-1	10958909	10960733	1224	37.8468	21.5343	0.568986	0.0409225	29.7802	.	207.89	5.49293	114.38	5.31152	.	26.96	0.712345		17.8367	0.82829		28.0533	0.942012
chrV	WBGene00008920	eef-1G	1	10965740	10967912	1572	49.2287	21.7405	0.441622	8.52113e-11	40.1721	.	200.61	4.07506	87.6767	4.03288	.	16.9833	0.344989		9.97	0.458592		14.86	0.369909
chrV	WBGene00008921	F17C11.10	-1	10961814	10965614	3200	6.33563	5.08141	0.802037	0.631159	5.6075	.	37.5667	5.92943	31.6833	6.23515	.	1.61667	0.255171		1.35	0.265674		0.36	0.0641997
chrV	WBGene00008922	F17C11.11	-1	10937614	10938817	603	23.5688	33.6957	1.42967	0.132622	11.3051	.	51.7367	2.19513	67.3567	1.99897	.	4.16333	0.176646		6.83667	0.202894		4.59333	0.406305
chrX	WBGene00008924	F17E5.2	1	12394016	12399422	4786	7.96218	12.2106	1.53358	2.23435e-07	7.62641	.	28.2033	3.54216	44.4933	3.64382	.	2.31667	0.290959		4.82333	0.395012		3.26	0.427462
chrX	WBGene00008925	F17H10.1	1	13105122	13108474	2751	15.2237	35.3259	2.32045	1.64192e-23	20.0643	.	45.8267	3.01021	66.3633	1.8786	.	19.39	1.27367		43.3767	1.2279		16.9067	0.842623
chrX	WBGene00008927	F17H10.3	-1	13116286	13122342	5387	20.6245	28.9913	1.40567	2.85937e-08	19.6273	.	61.71	2.99208	55.88	1.92748	.	4.4	0.213339		6.53	0.22524		3.25333	0.165756
chrII	WBGene00008929	F18A11.2	1	13032755	13036435	1909	6.57491	5.06443	0.770267	0.398706	4.59979	.	19.0633	2.89941	20.0467	3.95833	.	5.62667	0.855779		5.52	1.08995		1.56	0.339146
chrII	WBGene00008932	F18A11.5	-1	13009196	13014081	3894	11.8445	9.53287	0.804835	0.570252	14.745	.	9.82333	0.829358	7.01342	0.735709	.	371.01	31.3234		384.577	40.3422		306.587	20.7926
chrX	WBGene00008940	F18H3.4	1	13527576	13531977	3800	11.733	26.0259	2.21818	2.01774e-21	12.2089	.	47.1333	4.01715	142.41	5.47185	.	9.35667	0.797464		15.06	0.578654		10.1467	0.831084
chrV	WBGene00008944	F19B2.5	-1	20162617	20164529	1083	12.9261	62.6611	4.84763	1.74716e-20	30.187	.	43.58	3.37147	150.583	2.40314	.	3.7517	0.290242		18.8265	0.30045		8.27211	0.274029
chrX	WBGene00008951	F19C6.2	1	9999992	10004881	4289	26.9011	37.3582	1.38872	4.87391e-08	24.8135	.	76.8467	2.85663	263.037	7.04093	.	37.0367	1.37677		41.2667	1.10462		31.84	1.28317
chrX	WBGene00008956	nekl-3	-1	12389526	12392543	2417	2.66942	5.41208	2.02743	9.9554e-06	2.72445	.	6.56667	2.45996	14.4967	2.67858	.	3.35667	1.25745		6.00333	1.10925		5.92	2.17291
chrII	WBGene00008964	mltn-9	1	14616034	14622514	5675	8.50696	6.60978	0.776985	0.347122	8.29692	.	16.0667	1.88865	12.8567	1.9451	.	3.25667	0.382824		4.82	0.729222		4.83333	0.582546
chrIV	WBGene00008970	F20C5.5	-1	8767675	8771301	2775	29.211	43.8285	1.50041	4.23658e-09	29.2362	.	175.763	6.01703	129.717	2.95964	.	282.023	9.6547		233.897	5.33664		210.76	7.20887
chrIV	WBGene00008971	F20C5.6	-1	8771698	8773456	1158	55.4827	45.1757	0.814231	0.813289	52.3981	.	309.827	5.5842	269.983	5.97629	.	555.297	10.0085		581.537	12.8728		344.32	6.57123
chrX	WBGene00008973	F20D1.1	-1	14968833	14970438	1005	23.0786	55.8791	2.42125	3.8035e-22	26.0299	.	88	3.81306	166.06	2.97177	.	42.1267	1.82536		98.3133	1.75939		53.0767	2.03907
chrX	WBGene00008974	tbc-1	1	14970541	14974706	3193	13.5141	24.8368	1.83785	6.07844e-14	16.8966	.	77.32	5.72143	154.91	6.23711	.	3.64667	0.269842		7.60333	0.306131		6.52667	0.38627
chrX	WBGene00008975	F20D1.3	1	14975515	14978651	2227	29.608	66.1668	2.23476	2.89159e-13	34.4261	.	105.593	3.56638	259.183	3.91712	.	8.27	0.279316		21.9767	0.33214		11.8133	0.34315
chrX	WBGene00008976	plp-2	-1	14982070	14983368	475	9.71263	19.0242	1.95871	0.0832281	15.9979	.	0	0	0	0	.	5.78333	0.595445		7.81667	0.41088		4.34667	0.271702
chrX	WBGene00008980	tag-299	1	14978843	14980365	832	14.253	34.354	2.4103	3.34576e-16	22.6478	.	22.6957	1.59234	72.79	2.11882	.	62.32	4.37241		75.1267	2.18684		53.8267	2.37668
chrV	WBGene00008986	F20G2.2	-1	13754998	13756573	975	15.4569	10.5513	0.682625	0.158872	14.4523	.	161.148	10.4256	67.7398	6.42005	.	6.55667	0.42419		3.95333	0.374678		5.19333	0.359343
chrV	WBGene00008987	F20G2.3	-1	13765771	13768491	2119	10.697	6.01439	0.562249	0.0183526	7.23974	.	31.9933	2.99086	20.0367	3.33145	.	3.31	0.309432		2.11667	0.351934		2.78	0.383992
chrI	WBGene00008990	smgl-1	-1	7918437	7926437	6356	15.5258	11.9693	0.770931	0.236534	13.1413	.	100.443	6.46945	75.3167	6.29248	.	110.94	7.14552		95.1367	7.94838		89.8467	6.83698
chrIV	WBGene00009006	F21D5.1	1	8725643	8728048	1805	13.2161	5.21884	0.394886	8.60082e-07	12.0936	.	73.39	5.55309	42.3633	8.11739	.	8.1	0.61289		4.14	0.79328		6.52	0.539127
chrIV	WBGene00009009	F21D5.4	1	8737562	8739086	924	5.62716	2.48323	0.441292	0.00938189	4.08983	.	63.0567	11.2058	38.2667	15.4101	.	1.92	0.341202		0.936667	0.377198		1.57333	0.384694
chrV	WBGene00009018	F21D9.4	1	19253790	19256729	1796	3.07767	1.38976	0.45156	0.0121271	2.14031	.	19.8284	6.44265	12.5286	9.01495	.	9.71667	3.15715		2.01	1.4463		9.38	4.38254
chrX	WBGene00009025	F21G4.4	-1	9897255	9899793	1778	27.662	49.759	1.79882	2.00606e-14	22.6985	.	76.7697	2.77528	117.987	2.37117	.	19.2933	0.697468		32.6133	0.655426		17.9867	0.792415
chrX	WBGene00009027	F21G4.6	-1	9908740	9917451	8098	8.79371	13.5681	1.54293	1.55264e-09	7.02606	.	8.66026	0.984823	20.1711	1.48665	.	2.68	0.304763		2.74333	0.20219		1.93333	0.275166
chrV	WBGene00009030	clec-233	1	16233478	16234876	798	11.5608	16.2055	1.40177	0.0612494	8.51504	.	34.8167	3.01162	36.1533	2.23093	.	5.63667	0.487568		6.81	0.420227		7	0.822075
chrV	WBGene00009031	F21H7.5	1	16235904	16238801	1889	11.7038	8.49815	0.726101	0.193032	10.2938	.	16.3	1.39271	10.4233	1.22654	.	19.2267	1.64277		29.2167	3.438		12.9933	1.26225
chrV	WBGene00009048	cth-1	1	16100395	16102724	1618	5.90049	3.96848	0.672567	0.184988	5.8665	.	29.2267	4.95326	19.5	4.91372	.	4.25333	0.720844		3.26667	0.823153		2.76667	0.471604
chrI	WBGene00009050	F22D6.2	-1	7079910	7084528	4018	91.548	133.498	1.45823	9.59087e-12	104.218	.	514.947	5.62488	794.723	5.95309	.	185.247	2.02349		439.263	3.29042		173.31	1.66295
chrV	WBGene00009059	chw-1	1	10460828	10464637	3209	25.6296	26.2008	1.02229	0.198925	19.7688	.	102.487	3.99876	103.44	3.94796	.	4.23667	0.165303		6.66	0.25419		0.84	0.0424913
chrI	WBGene00009065	F22G12.5	1	13162383	13182797	16680	10.9497	11.237	1.02624	0.196869	9.61313	.	56.0556	5.11937	76.6111	6.81776	.	2.09	0.190873		2.45667	0.218623		1.44667	0.150489
chrV	WBGene00009082	F23B12.5	-1	14445310	14447536	1626	13.369	7.25554	0.542713	0.0036585	16.901	.	73.0533	5.46438	57.7567	7.96036	.	3.02333	0.226145		3.02	0.416234		1.92667	0.113997
chrX	WBGene00009089	F23D12.5	1	14447673	14453492	4883	10.0873	14.2983	1.41745	1.9706e-06	10.3045	.	20.55	2.03721	36.3567	2.54273	.	2.78	0.275593		4.16	0.290944		1.92667	0.186973
chrV	WBGene00009094	F23H12.5	1	12357868	12363672	5139	8.69498	7.31222	0.84097	0.8222	8.0358	.	30.8633	3.54956	42.4267	5.80216	.	2.86667	0.329692		3.31	0.452667		5.68	0.706836
chrV	WBGene00009098	ehbp-1	1	9550542	9556005	4655	17.6826	12.616	0.71347	0.0572887	18.2867	.	39.25	2.2197	56.0733	4.44462	.	22.3333	1.26301		10.0633	0.797664		17	0.929638
chrV	WBGene00009103	F25B3.6	-1	9580017	9583023	2406	24.8562	15.2548	0.613721	0.00273834	20.2631	.	168.867	6.79375	122.877	8.05496	.	9.00667	0.362351		7.49	0.490994		4.95333	0.244451
chrV	WBGene00009108	F25D1.3	1	10528763	10530609	1242	4.8909	4.17391	0.853404	1	3.56441	.	20.95	4.28346	15.8247	3.79133	.	5.20667	1.06456		2.74333	0.657257		2.76667	0.776192
chrI	WBGene00009112	tag-353	1	10400829	10402765	1336	43.8877	33.2721	0.758118	0.225945	37.4394	.	195.403	4.45235	125.13	3.76081	.	18.08	0.41196		12.32	0.37028		15.58	0.416139
chrI	WBGene00009116	F25H2.2	1	10539456	10546414	6353	11.6224	8.41988	0.724454	0.0894337	10.6345	.	72.39	6.2285	61.5733	7.31285	.	12.28	1.05658		9.81	1.1651		6.99333	0.657608
chrI	WBGene00009118	F25H2.4	1	10551681	10553025	744	15.5047	10.1492	0.654588	0.31933	13.2809	.	46.4933	2.99866	36.9167	3.6374	.	4.24	0.273465		2.42667	0.239099		3.38667	0.255003
chrI	WBGene00009120	F25H2.6	1	10554000	10558039	3066	20.1804	11.6389	0.576746	0.000233125	19.6005	.	48.0467	2.38086	43.95	3.77612	.	8.05	0.398903		6.76667	0.581382		7.85333	0.400671
chrI	WBGene00009126	pyk-1	1	9167495	9177490	9036	21.0022	17.4676	0.831704	0.656971	21.6538	.	82.03	3.90579	46.5267	2.6636	.	21.4167	1.01974		12.2567	0.701681		21.6867	1.00152
chrI	WBGene00009127	F25H5.5	-1	9159881	9163465	2981	8.75495	4.81298	0.549744	0.00287609	8.1268	.	77.46	8.84757	32.3121	6.71353	.	2.47667	0.282888		2.61333	0.542976		2.66	0.327312
chrIV	WBGene00009133	bed-3	1	9915346	9921948	6002	29.3349	21.7765	0.742341	0.0850009	21.15	.	119.38	4.06956	92.3567	4.24112	.	6.55667	0.223511		5.56	0.255321		9.97333	0.471554
chrV	WBGene00009135	F25H9.2	1	13458106	13459425	719	6.11892	2.84492	0.464939	0.0267816	6.48818	.	40.97	6.69563	21.23	7.46242	.	2.08333	0.340474		1.18	0.414774		1.20667	0.185979
chrV	WBGene00009138	F25H9.6	-1	13466975	13468313	707	4.8041	3.16549	0.658914	0.269628	6.16973	.	30.31	6.30919	16.3933	5.17877	.	3.23333	0.673036		2.53	0.799245		3.5	0.567286
chrI	WBGene00009161	F26E4.6	1	9772693	9774007	714	25.4566	12.4727	0.489959	0.113542	15.5812	.	160.95	6.32253	110.773	8.88127	.	3.76	0.147702		2.5	0.200438		3.86667	0.248162
chrI	WBGene00009162	F26E4.7	1	9774199	9779532	4058	27.138	27.2632	1.00461	0.0933769	24.0956	.	131.34	4.83971	137.617	5.04771	.	138.17	5.09138		44.2933	1.62466		98.02	4.06796
chrI	WBGene00009164	hrdl-1	1	9791025	9796668	4680	21.1796	19.1663	0.904944	0.600448	20.8934	.	114.04	5.38443	167.897	8.75997	.	14.3633	0.678168		15.1267	0.789231		25.2333	1.20772
chrI	WBGene00009165	F26E4.12	1	9780188	9781407	553	16.1392	19.6284	1.21619	0.0216215	15.7071	.	36.5733	2.26611	54.26	2.76436	.	17.7367	1.09898		13.45	0.685232		37.62	2.3951
chrI	WBGene00009173	prom-1	1	9286773	9290144	2770	0.738267	0.761913	1.03203	0.675602	0.587004	.	1.12333	1.52158	1.87333	2.45872	.	1.87667	2.54199		0.87	1.14186		0.84	1.431
chrI	WBGene00009174	F26H9.2	-1	9289736	9298568	8048	19.9994	13.1567	0.657855	0.00200958	15.8396	.	125.78	6.2892	96.7933	7.35697	.	15.4733	0.773691		17.6567	1.34203		11.3533	0.71677
chrI	WBGene00009177	F26H9.5	-1	9312636	9315573	2195	21.6125	20.9683	0.970194	0.535468	25.303	.	128.297	5.93622	124.647	5.94452	.	7.59667	0.351494		14.8633	0.708847		10.0267	0.396265
chrII	WBGene00009180	nurf-1	1	14390198	14407829	16315	49.1557	83.4281	1.69722	1.15639e-19	85.5432	.	861.799	17.532	1832.28	21.9624	.	20.0967	0.408837		26.3367	0.315681		15.2133	0.177844
chrII	WBGene00009182	F26H11.4	1	14408015	14410733	2059	3.72074	4.13089	1.11023	0.418885	10.8849	.	10.57	2.84083	17.2967	4.18715	.	845.918	227.352		998.053	241.607		866.071	79.5663
chrI	WBGene00009187	F27D4.1	1	7702306	7705277	2362	23.7405	17.3857	0.732323	0.113021	21.5358	.	26.9494	1.13517	9.48276	0.545435	.	15.0967	0.635904		21.08	1.21249		26.4467	1.22803
chrI	WBGene00009188	lsy-22	-1	7704568	7711757	6537	61.061	41.1427	0.673797	0.00176854	52.0284	.	410.067	6.71568	308.01	7.48638	.	32.69	0.535366		30.98	0.752989		25.1933	0.484223
chrI	WBGene00009189	F27D4.4	1	7724821	7727109	1683	7.41889	3.34878	0.451386	0.00135448	6.65716	.	53.6833	7.23603	29.0667	8.67977	.	1.57333	0.212071		1.63	0.486744		0.48	0.0721028
chrI	WBGene00009190	F27D4.6	1	7730999	7737989	6328	10.5635	6.98973	0.661685	0.0339553	8.79283	.	28.56	2.70364	22.8567	3.27004	.	2.29	0.216784		0.936667	0.134006		0.84	0.0955324
chrV	WBGene00009200	F28C1.1	1	12450688	12453792	2502	8.39448	3.83573	0.456935	9.40087e-05	8.47722	.	37.3007	4.44347	17.9744	4.68603	.	1.87333	0.223162		1.01	0.263314		0.966667	0.114031
chrV	WBGene00009201	F28C1.3	1	12465821	12472691	6270	24.2589	17.6913	0.729272	0.0673038	21.0048	.	47.6133	1.96272	64.6767	3.65584	.	18.98	0.782395		16.4633	0.930589		11.5867	0.55162
chrII	WBGene00009202	F28C6.1	1	8591079	8592922	1039	7.52839	7.51588	0.998338	0.385662	5.88932	.	26.0733	3.46333	29.4067	3.9126	.	2.23333	0.296655		1.94	0.25812		3.38	0.573921
chrIV	WBGene00009211	F28D1.1	1	12372117	12374884	2166	6.9783	3.82618	0.548296	0.0148499	7.5554	.	43.12	6.17915	41.2267	10.7749	.	71.6216	10.2635		48.6926	12.7262		47.75	6.31998
chrIV	WBGene00009212	F28D1.2	-1	12374471	12376092	1007	33.7433	29.4359	0.87235	0.932135	35.7786	.	150	4.44533	185.743	6.31008	.	21.5367	0.63825		25.7033	0.873195		19.56	0.546696
chrX	WBGene00009233	F28H6.4	1	14127478	14133458	5252	11.6177	20.2153	1.74005	7.63137e-12	13.8675	.	80.7967	6.95464	135.8	6.71767	.	4.41667	0.380168		8.91667	0.441084		4.71333	0.339884
chrX	WBGene00009234	F28H6.6	-1	14117042	14125986	4972	9.88043	18.4527	1.8676	1.75331e-17	11.1325	.	64.5067	6.52873	99.9651	5.41736	.	5.09333	0.515497		7.56333	0.409876		9.67333	0.868924
chrII	WBGene00009246	F29C12.4	1	13117262	13122015	2876	7.91516	4.58328	0.57905	0.00673046	8.6057	.	50.7517	6.41196	37.0201	8.07722	.	0.889262	0.112349		0.802013	0.174987		0.362416	0.0421135
chrI	WBGene00009250	F29D10.1	1	8839300	8841156	1246	19.1063	14.8006	0.774641	0.653301	18.6284	.	6.39506	0.334709	2.61806	0.176889	.	7.16	0.374745		7.60333	0.513719		6.52	0.350003
chrV	WBGene00009256	tut-2	1	10658199	10659637	818	9.55196	5.95232	0.623152	0.109328	11.4328	.	54.5533	5.71122	32.9933	5.54293	.	2.56667	0.268706		2.08667	0.350563		1.68667	0.147529
chrI	WBGene00009260	F30A10.1	-1	9472634	9474910	1675	33.3003	20.3475	0.611029	0.0283625	23.3433	.	93.0433	2.79407	58.5833	2.87915	.	11.6833	0.350848		8.75	0.430029		10.2667	0.439812
chrI	WBGene00009261	F30A10.2	-1	9479100	9480658	958	11.9353	11.6712	0.977873	0.657175	6.39144	.	57.19	4.79168	47.3333	4.05557	.	4.89333	0.409989		5.97333	0.511802		1.80667	0.28267
chrI	WBGene00009264	sac-1	1	9488377	9492615	2222	21.3456	11.6519	0.545868	0.000425143	18.2768	.	101.7	4.76444	47.3133	4.06057	.	7.19	0.336837		6.11667	0.524951		5.92	0.323908
chrI	WBGene00009272	F30F8.3	1	7835710	7836963	653	17.4954	9.1072	0.520548	0.00285252	16.7611	.	74.5867	4.26321	34.2067	3.756	.	6.35667	0.363333		3.23333	0.355031		4.47333	0.266888
chrI	WBGene00009274	F30F8.5	-1	7846917	7848821	1304	11.4034	8.84317	0.775488	0.519411	11.0376	.	24.7133	2.16719	20.93	2.3668	.	10.6067	0.930134		9.17	1.03696		9.77333	0.88546
chrI	WBGene00009284	F31C3.2	1	15036008	15040476	3652	18.392	30.2548	1.645	4.17758e-12	20.4255	.	51.0167	2.77385	150.683	4.98048	.	74.84	4.06917		79.49	2.62735		65.6267	3.21297
chrI	WBGene00009286	F31C3.4	-1	15050786	15052611	1220	20.125	32.8512	1.63236	3.63051e-08	20.4607	.	203.12	10.0929	288.697	8.788	.	7.29667	0.362567		13.1467	0.400188		7.96667	0.389365
chrV	WBGene00009290	F31D4.2	-1	20841542	20845628	2961	20.1072	14.3843	0.715381	0.0808428	21.6072	.	52.06	2.58912	50.9867	3.5446	.	4.44667	0.221148		4.75667	0.330684		3.26	0.150875
chrV	WBGene00009292	F31D4.5	1	20854020	20858545	3356	23.5402	16.4604	0.699244	0.0345387	16.2014	.	50.6111	2.14998	59.9691	3.64324	.	9.47	0.40229		10.5667	0.641946		3.26	0.201217
chrV	WBGene00009293	F31D4.8	-1	20866722	20868518	1068	7.05056	9.69429	1.37497	0.00774611	8.85581	.	16.49	2.33882	30.2867	3.12418	.	5.26333	0.746513		7.28667	0.751645		9.92	1.12017
chrV	WBGene00009299	F31E9.6	-1	17313546	17315937	1106	19.4715	13.0389	0.669639	0.0443243	23.7089	.	22.3377	1.1472	11.5824	0.888294	.	11.2609	0.578325		6.60145	0.50629		24.471	1.03215
chrI	WBGene00009304	eva-1	-1	14829656	14834935	4530	32.5885	30.4775	0.935221	0.342522	31.6397	.	93.99	2.88414	111.063	3.64411	.	16.8467	0.516951		21.47	0.704454		15.4533	0.488415
chrI	WBGene00009306	F32A7.5	1	14844809	14850315	3260	27.4867	17.2828	0.628771	0.000726693	26.4485	.	245.973	8.94883	244.693	14.1582	.	12.4767	0.453917		9.71333	0.562022		4.69333	0.177452
chrII	WBGene00009307	F32A11.1	1	13157112	13160358	2077	7.76384	3.64829	0.469908	0.000264982	6.62446	.	121.58	15.6598	97.1667	26.6335	.	4.38667	0.565012		1.31333	0.359986		2.78	0.419657
chrI	WBGene00009314	F32B4.4	1	11517353	11526553	8276	15.9561	15.5773	0.976256	0.171029	20.3218	.	193.63	12.1351	256.3	16.4535	.	4.58	0.287037		2.98	0.191304		3.38	0.166324
chrI	WBGene00009315	F32B4.5	-1	11517739	11520583	2086	2.57622	1.21453	0.471437	0.0439385	1.97459	.	6.93	2.68999	3.57667	2.94491	.	1.72	0.667644		1.42333	1.17193		1.20667	0.611097
chrIV	WBGene00009319	F32B6.2	1	9884483	9887131	2048	10.4534	6.08301	0.581918	0.0144022	8.22314	.	59.3333	5.676	41.5467	6.82995	.	3.45667	0.330675		5.34333	0.878403		3.74	0.454814
chrV	WBGene00009330	F32D8.5	1	10894827	10896114	687	11.2766	6.88282	0.610365	0.0812953	9.77438	.	29.8	2.64265	16.3367	2.37354	.	1.96	0.173812		2.58333	0.37533		4.84	0.495172
chrV	WBGene00009331	F32D8.7	1	10898446	10900682	1632	14.0147	11.1235	0.7937	0.606922	8.28493	.	66.7933	4.76595	45.6467	4.10364	.	3.24	0.231186		1.97667	0.177702		4.23333	0.510968
chrV	WBGene00009337	uig-1	-1	13273553	13295876	21709	21.6559	13.612	0.628557	0.0119471	16.1742	.	218.44	10.0868	222.137	16.3192	.	2.79	0.128833		1.8	0.132236		2.9	0.179298
chrV	WBGene00009340	F32G8.4	1	10557393	10560769	2425	10.5751	5.85361	0.55353	0.0016307	7.14722	.	40.9967	3.87673	28.5267	4.87335	.	1.2	0.113475		3.23667	0.552935		1.44667	0.20241
chrI	WBGene00009342	fasn-1	-1	8975377	8987064	11021	90.872	171.283	1.88488	5.42158e-26	103.587	.	213.18	2.34594	709.99	4.14513	.	33.5233	0.368907		36.28	0.211813		16.9	0.163148
chrII	WBGene00009354	F33A8.6	1	11050087	11052269	1168	7.29281	5.41695	0.74278	0.506768	7.34161	.	12.43	1.70442	14.5167	2.67986	.	5.14667	0.705718		3.93667	0.726731		6.53333	0.889905
chrI	WBGene00009361	F33E2.5	-1	12591110	12597452	5423	19.1271	18.4181	0.962931	0.240306	22.455	.	204.818	10.7082	249.426	13.5424	.	5.92667	0.309856		6.60333	0.358524		5.90667	0.263045
chrII	WBGene00009364	F33H1.3	1	10172634	10174287	1053	15.9084	9.84473	0.61884	0.274781	13.2032	.	106.197	6.67553	60.1533	6.11021	.	4.81333	0.302566		3.57667	0.363308		5.67333	0.429693
chrII	WBGene00009365	F33H1.4	1	10174489	10180128	5029	13.767	18.8367	1.36826	0.000471573	14.1392	.	60.0133	4.35923	99.7667	5.29639	.	103.663	7.52987		58.1367	3.08634		70.5333	4.9885
chrI	WBGene00009366	F33H2.2	1	15023143	15027750	3873	8.73238	6.2458	0.715247	0.144191	8.73715	.	45.4967	5.21011	29.8167	4.77387	.	4.90667	0.561894		3.85	0.616414		5.07333	0.580662
chrI	WBGene00009367	F33H2.3	1	15034131	15035456	717	25.1123	46.0516	1.83383	6.33602e-11	34.3612	.	135.412	5.39228	165.912	3.60275	.	9.73333	0.387593		15.4467	0.335421		11.6067	0.337784
chrI	WBGene00009370	set-10	-1	15027489	15030892	2639	10.4962	14.1383	1.34699	0.000189457	10.8363	.	35.4233	3.37487	40.4167	2.85866	.	26.5267	2.52726		50.73	3.58812		18.4333	1.70107
chrIII	WBGene00009374	F34D10.4	1	3735989	3739745	2715	17.3694	13.767	0.792601	0.506288	22.3004	.	8.91667	0.513354	16.7192	1.21444	.	34.7951	2.00324	Y	41.7292	3.03109	Y	58.9688	2.64429
chrV	WBGene00009433	F35E12.9	-1	13741308	13744982	3050	8.94967	18.7395	2.09388	1.66057e-08	6.24131	.	22.7979	2.54734	33.6229	1.79422	.	2.72333	0.304294		4.65	0.248139		1.08667	0.174109
chrIII	WBGene00009441	F35G12.4	1	4578603	4581664	2461	8.61804	5.50386	0.638644	0.0499166	8.63836	.	59.84	6.94357	31.06	5.64331	.	1.29	0.149686		1.62333	0.294945		1.57333	0.182133
chrII	WBGene00009448	zfp-2	1	9557619	9559455	1236	16.0866	11.7646	0.731328	0.252711	14.4239	.	123.23	7.66043	110.087	9.35748	.	5.84	0.363036		5.58	0.474306		5.68	0.39379
chrII	WBGene00009450	ugt-58	-1	9584319	9586889	1964	11.2625	10.8381	0.962318	0.43957	10.4313	.	66.8	5.9312	69.3867	6.40211	.	4.96333	0.440697		4.16333	0.384139		5.79333	0.555382
chrI	WBGene00009451	cids-2	-1	8804796	8808035	2638	13.3033	7.59249	0.570724	0.00157327	13.196	.	96.0811	7.22237	40.5407	5.33958	.	6.28667	0.472566		7.53333	0.992208		8.81333	0.66788
chrI	WBGene00009454	F36A2.7	1	8813515	8815190	1075	35.9279	22.3926	0.623264	0.00545314	25.693	.	119.697	3.33158	74.8267	3.34159	.	55.2533	1.53789		27.62	1.23345		45.2333	1.76053
chrI	WBGene00009460	F36A2.13	-1	8828037	8839195	10550	19.7829	16.6608	0.842178	0.791663	20.2054	.	183.808	9.29125	221.496	13.2945	.	8.37667	0.423429		6.73333	0.404143		5.68	0.281114
chrI	WBGene00009461	F36D1.1	-1	11276484	11280726	3448	9.23332	5.43083	0.588177	0.00356023	9.21317	.	102.783	11.1318	61.58	11.339	.	2.28	0.246932		1.88	0.346172		4.47333	0.485537
chrV	WBGene00009469	F36D3.1	1	16499232	16502856	2671	5.00393	3.26806	0.653099	0.123618	5.40285	.	29.969	5.98908	19.9554	6.1062	.	2.26667	0.452977		1.77667	0.543645		2.29333	0.424468
chrI	WBGene00009477	tag-214	-1	9009047	9014071	4424	18.8858	14.8921	0.78853	0.732931	22.8877	.	69.1867	3.66341	64.07	4.30229	.	15.3867	0.814719		11.6933	0.785206		14.86	0.649258
chrI	WBGene00009499	F36H2.2	-1	9246018	9249367	2695	23.6657	17.3314	0.732341	0.285823	19.5774	.	102.113	4.31483	70.9467	4.09354	.	18.1633	0.767497		14.4	0.830864		16.6767	0.851834
chrIII	WBGene00009503	F37A8.5	1	3955919	3957455	918	13.1961	7.81046	0.591877	0.219767	13.7473	.	24.17	1.8316	16.8	2.15096	.	11.1567	0.845453		6.10333	0.781431		10.4867	0.762818
chrI	WBGene00009508	F37D6.2	-1	10475513	10479107	2994	34.8963	22.6663	0.649534	0.0696498	30.7401	.	108.677	3.11428	93.2767	4.11521	.	24.0267	0.688516		14.0367	0.619274		20.78	0.675989
chrII	WBGene00009513	sfxn-1.2	1	11185198	11188021	2159	3.05188	1.62413	0.532175	0.223311	3.67439	.	14.86	4.86914	19.4467	11.9736	.	7.68	2.51649		3.85667	2.3746		7.36667	2.00487
chrII	WBGene00009514	F37H8.5	1	11188238	11189381	540	7.86759	4.87037	0.619042	0.184571	6.53148	.	51.5733	6.55516	46.3367	9.51399	.	10.1633	1.2918		8.2	1.68365		5.54667	0.84922
chrIV	WBGene00009521	F38A1.8	-1	1232901	1239851	5729	12.4883	11.2647	0.90202	0.650502	13.5388	.	52.3367	4.19085	69.7679	6.19349	.	4.39333	0.351796		6.45667	0.573177		8.7	0.642596
chrIV	WBGene00009523	clec-165	-1	1245399	1246883	815	3.15399	5.84233	1.85236	0.00261555	2.92638	.	6.76667	2.14543	9.98667	1.70936	.	0.513423	0.162785		1.08389	0.185524		0.731544	0.249982
chrV	WBGene00009534	F38B7.3	1	11549278	11551542	1650	12.1915	19.4509	1.59545	1.20592e-06	15.3264	.	40.3033	3.30585	39.6533	2.03864	.	6.58	0.53972		7.81667	0.401866		11.8467	0.77296
chrIV	WBGene00009542	F38E11.5	1	9459482	9463372	2854	35.6882	20.0156	0.560847	5.85003e-06	28.0704	.	106.487	2.98381	103.89	5.19045	.	18.1267	0.507918		10.4767	0.523425		11.2267	0.399946
chrIV	WBGene00009544	F38E11.9	-1	9442888	9444393	905	14.4221	21.4282	1.48579	0.00852244	15.9171	.	68.7133	4.76445	108.52	5.06436	.	9.48333	0.657556		12.98	0.605744		19.6867	1.23682
chrX	WBGene00009552	piki-1	-1	15234763	15246640	9775	10.7031	13.7785	1.28734	6.58927e-06	10.5298	.	49.0724	4.58489	68.6908	4.98537	.	4.26667	0.39864		4.31333	0.313049		3.38	0.320993
chrI	WBGene00009554	F39B2.3	-1	14788113	14790028	1281	6.23302	4.61827	0.740936	0.470425	8.80796	.	14.05	2.25412	8.50333	1.84124	.	2.08333	0.334241		0.663333	0.143633		0.846667	0.0961251
chrI	WBGene00009558	F39B2.8	-1	14760637	14768929	6248	7.54898	6.91245	0.915681	0.537355	8.52097	.	50.7717	6.72563	37.4854	5.42289	.	20.3533	2.69617		17.4933	2.5307		29.84	3.50195
chrI	WBGene00009559	mtx-1	-1	14755140	14756420	680	14.4441	11.8882	0.82305	0.80389	19.1103	.	43.4675	3.00936	29.2093	2.45699	.	5.96667	0.413086		11.08	0.932014		7.60667	0.39804
chrX	WBGene00009561	F39D8.3	1	15420925	15424954	3160	5.21788	4.68465	0.897808	0.810497	3.42184	.	5.89667	1.13009	10.4233	2.225	.	2.4	0.459957		4.23667	0.904372		0.846667	0.247431
chrV	WBGene00009571	F40D4.12	1	17159516	17162597	2448	0.786969	0.460989	0.585777	0.448255	0.796569	.	0.6	0.762419	1.21631	2.63849	.	1.69667	2.15595		3.71	8.04792		3.02	3.79126
chrX	WBGene00009574	F40E10.6	-1	14703645	14708256	3849	26.5006	42.9671	1.62136	4.38647e-13	28.2796	.	46.6867	1.76172	131.747	3.06622	.	10.0467	0.37911		24.7033	0.574936		12.6733	0.448145
chrV	WBGene00009582	F40F9.5	-1	9719745	9724273	3843	19.5674	15.4694	0.790571	0.341398	18.5259	.	36.406	1.86055	34.7886	2.24886	.	5.33333	0.272562		3.42333	0.221297		4.47333	0.241464
chrV	WBGene00009583	aagr-3	-1	9725947	9729904	3355	23.7009	17.418	0.73491	0.119852	23.5341	.	76.26	3.2176	47.2467	2.71251	.	22.1467	0.934423		16.9433	0.972747		40.5333	1.72232
chrV	WBGene00009586	F40F9.10	-1	9711439	9714383	2344	8.17044	4.87457	0.596611	0.0226019	6.65657	.	31.9433	3.90962	26.1	5.35431	.	8.33	1.01953		8.81667	1.80871		5.44	0.817238
chrIV	WBGene00009587	F40F11.2	1	11593691	11601764	7452	66.6764	64.805	0.971933	0.111723	63.4222	.	400.593	6.00802	353.38	5.45297	.	40.0967	0.601362		40.4	0.623409		42.7467	0.674001
chrIII	WBGene00009594	cyld-1	-1	9898514	9912043	12230	16.0404	13.026	0.81208	0.490916	14.5468	.	72.94	4.54728	89.15	6.84398	.	4.76333	0.296959		1.88	0.144326		4.83333	0.332262
chrX	WBGene00009632	ttyh-1	1	11366142	11374292	7548	26.2793	48.6471	1.85115	4.02172e-21	27.0047	.	142.44	5.42023	218.363	4.48872	.	13.0167	0.495319		28.2067	0.579822		11.94	0.442145
chrX	WBGene00009635	F42F12.3	1	12350349	12351678	720	6.88264	10.2347	1.48703	0.00553481	9.78889	.	36.9867	5.37391	65.4067	6.39066	.	4.28	0.621855		5.97	0.583308		2.17333	0.22202
chrV	WBGene00009650	F43D2.1	1	14612430	14613694	664	11.244	6.34337	0.564158	0.0427188	10.0783	.	50.8833	4.52539	16.63	2.62163	.	3.20333	0.284893		2.98667	0.470833		1.69333	0.168018
chrII	WBGene00009657	F43G6.4	1	11789852	11797242	6684	16.6972	13.3826	0.80149	0.44172	16.6864	.	46.4028	2.77908	37.125	2.77412	.	12.1167	0.725671		11.8267	0.883733		8.08667	0.484626
chrII	WBGene00009658	F43G6.5	-1	11814776	11817189	1764	6.39399	6.38492	0.998581	0.437412	4.69558	.	9.57333	1.49724	10.6767	1.67217	.	5.10204	0.797943		7.47619	1.17091		6.03401	1.28504
chrII	WBGene00009660	F43G6.8	-1	11812233	11814044	1175	37.3379	29.3834	0.78696	0.478828	40.3353	.	61.6733	1.65176	39.5267	1.3452	.	8.83333	0.236578		8.71	0.296426		9.64667	0.239162
chrII	WBGene00009661	patr-1	-1	11774601	11778088	2886	44.9414	27.1778	0.604737	0.000134225	40.2769	.	142.907	3.17984	116.01	4.26856	.	22.1967	0.493902		23.9733	0.882094		19.08	0.473721
chrI	WBGene00009664	F43G9.1	-1	8606398	8608832	1834	22.5881	13.2184	0.585193	0.112774	20.3048	.	93	4.11722	58.6701	4.43853	.	6.88667	0.304881		6.83	0.516705		9.42667	0.464258
chrI	WBGene00009665	F43G9.2	1	8608957	8611052	1494	16.8959	11.4066	0.675111	0.0900663	15.5315	.	78.12	4.6236	37.0567	3.2487	.	10.6867	0.6325		14.0967	1.23583		8.44	0.543413
chrI	WBGene00009666	F43G9.3	-1	8612722	8614964	1631	9.87523	5.21459	0.528048	0.00343079	9.77989	.	89.66	9.07928	32.6567	6.26255	.	7.74667	0.784454		4.51333	0.86552		4.94667	0.5058
chrI	WBGene00009672	F43G9.12	1	8640408	8644393	3264	8.3462	5.39966	0.646961	0.222653	7.14522	.	56.3333	6.74958	29.8633	5.53059	.	1.39597	0.167259		1.08389	0.200733		0.604027	0.0845358
chrX	WBGene00009674	nucb-1	1	10197462	10200347	2285	7.71685	11.2608	1.45925	0.000137294	7.77724	.	55.6433	7.21063	85.0867	7.55598	.	3.17	0.410789		5.11	0.453785		2.42	0.311164
chrX	WBGene00009677	F44A6.5	-1	10217246	10218881	1035	7.88551	23.713	3.00717	7.83298e-18	9.77971	.	42.9868	5.45137	70.7961	2.98553	.	1.78188	0.225969		3	0.126513		3.5302	0.360972
chrIV	WBGene00009678	F44D12.1	1	10007996	10014164	5565	22.9564	21.6706	0.943989	0.47113	20.4839	.	47.8567	2.08467	63.5767	2.93377	.	2.07667	0.0904612		2.32333	0.107211		2.17333	0.106099
chrI	WBGene00009696	F44F1.4	-1	13263792	13265701	1139	25.6032	20.9587	0.8186	0.689775	28.6624	.	64.7667	2.52964	42.2533	2.01602	.	19.18	0.749126		26.0967	1.24515		27.1867	0.948513
chrI	WBGene00009698	F44F1.6	-1	13260922	13263064	1344	86.0149	100.301	1.16609	0.0331663	91.9055	.	232.254	2.70016	109.683	1.09354	.	19.7279	0.229354		19.0646	0.190074		21.8027	0.23723
chrV	WBGene00009723	F45D3.3	-1	12549197	12550371	444	6.04842	3.70158	0.61199	0.69663	8.54054	.	9.11789	1.50748	5.40667	1.46064	.	2.88667	0.477259		5.24333	1.41651		3.74667	0.438692
chrIII	WBGene00009736	F45G2.10	-1	13436953	13439460	1841	9.95736	5.35334	0.537626	0.00368742	7.53829	.	11.3733	1.1422	13.3067	2.48568	.	70.8667	7.11701		72.5267	13.5479		56.62	7.51098
chrII	WBGene00009740	F45H10.3	-1	13493111	13494842	523	18.5946	16.8585	0.906632	0.751166	19.174	.	142.203	7.64752	77.5867	4.60223	.	20.46	1.10032		17.4967	1.03785		18.0933	0.943639
chrI	WBGene00009744	F45H11.3	1	10374732	10379617	4165	11.2273	6.36783	0.567176	0.00050058	10.0415	.	81.1859	7.23115	52.526	8.24866	.	5.01	0.446236		4.92	0.772634		7.36	0.732956
chrV	WBGene00009772	ztf-7	-1	9786925	9789934	2409	35.7279	31.8284	0.890854	0.667127	40.633	.	114.527	3.20553	108.353	3.4043	.	17.1967	0.481323		15.71	0.493585		15.5933	0.38376
chrII	WBGene00009781	F46C5.6	-1	8840139	8844739	4000	16.29	13.4819	0.827617	0.717074	12.7575	.	37.8033	2.32065	59.39	4.40517	.	6.84333	0.420094		7.69667	0.57089		1.80667	0.141616
chrII	WBGene00009783	rer-1	1	8811202	8812576	772	22.1282	12.2118	0.551864	0.00454561	20.4858	.	93.04	4.20458	56.98	4.66598	.	7.52667	0.340139		5.18333	0.424453		8.22	0.401255
chrV	WBGene00009791	F46F3.3	1	11667475	11669372	1131	5.00133	5.75022	1.14974	0.18537	4.65517	.	15.8867	3.17649	8.75667	1.52284	.	3.45667	0.69115		4.55	0.791274		3.38	0.726074
chrX	WBGene00009793	pkn-1	1	10394404	10402516	7510	50.3516	62.1079	1.23348	4.20896e-06	55.2002	.	206.523	4.10162	399.73	6.43606	.	25.92	0.51478		36.96	0.595094		31.84	0.57681
chrX	WBGene00009800	rrc-1	-1	9823702	9832376	7873	8.25422	13.1727	1.59588	2.372e-10	6.05144	.	51.5567	6.2461	69.9767	5.31223	.	4.6	0.55729		8.68333	0.659189		2.04667	0.338211
chrX	WBGene00009801	F47A4.5	-1	9833324	9838199	4275	10.4074	26.5547	2.55153	2.05995e-14	11.476	.	44.09	4.23642	121.14	4.5619	.	4.45667	0.428222		8.58	0.323106		1.32667	0.115603
chrV	WBGene00009804	F47B8.3	-1	14321351	14322919	915	4.2377	3.45027	0.814184	0.850666	4.4918	.	8.66092	2.04378	11.7188	3.39647	.	0.606667	0.143159		1.98333	0.574834		0.846667	0.188491
chrV	WBGene00009811	F47B8.10	1	14343028	14345645	2017	6.03	40.1269	6.65455	1.9661e-71	15.6539	.	18.16	3.01161	73.9867	1.84382	.	3.89	0.645108		11.7967	0.293984		4.96	0.316853
chrX	WBGene00009812	F47B10.1	-1	10897607	10901036	2826	26.1095	37.281	1.42787	4.43114e-08	25.4756	.	69.7333	2.6708	132.25	3.54739	.	9.30333	0.35632		22.5267	0.60424		16.1933	0.635641
chrX	WBGene00009813	F47B10.2	-1	10893502	10896299	2197	6.76878	14.5398	2.14807	2.60325e-07	6.78971	.	19.2033	2.83705	51.36	3.53237	.	4.81333	0.711108		7.57333	0.520868		2.9	0.427117
chrX	WBGene00009818	acbp-3	1	10902981	10905085	1504	22.1376	31.6596	1.43012	5.28098e-06	15.0226	.	111.4	5.03215	100.347	3.16955	.	7.75333	0.350233		13.62	0.430202		3.98	0.264934
chrI	WBGene00009825	F47G4.4	-1	14062721	14073010	9360	26.3697	19.6132	0.743779	0.0713715	28.3694	.	195.69	7.42101	211.12	10.7642	.	4.64	0.175959		3.44333	0.175562		2.88667	0.101753
chrV	WBGene00009829	F47G9.1	-1	11323944	11327071	932	23.3085	21.0139	0.901558	0.630624	20.8777	.	203.933	8.74932	117.083	5.5717	.	9.47	0.40629		8.09333	0.385141		9.8	0.469401
chrV	WBGene00009831	F47G9.4	-1	11317196	11321767	2735	8.04406	5.63729	0.700802	0.10391	6.4351	.	48.9567	6.08607	37.41	6.63616	.	2.28667	0.284268		1.52667	0.270815		1.69333	0.26314
chrV	WBGene00009848	F48F5.6	-1	20448257	20451880	2541	3.41558	1.01043	0.295829	1.09904e-05	1.94648	.	16.5833	4.8552	8.73333	8.64319	.	2.88	0.843194		0.656667	0.649889		2.41333	1.23985
chrX	WBGene00009850	F48F7.5	1	13973967	13977140	2573	14.4448	18.5952	1.28733	0.00149385	12.6634	.	73.8667	5.11372	109.177	5.87122	.	7.76667	0.537679		10.16	0.546377		9.16667	0.723869
chrX	WBGene00009851	F48F7.6	1	13977578	13978960	782	21.0281	48.952	2.32793	1.2364e-17	20.4156	.	99.2067	4.71781	188.857	3.85799	.	17.23	0.819378		33.3033	0.680326		23.5	1.15108
chrIV	WBGene00009878	F49C12.9	-1	9314793	9316166	773	18.1611	11.1662	0.614845	0.0415083	19.445	.	53.1632	2.92732	31.8163	2.84933	.	12.26	0.675071		11.45	1.02541		13.6467	0.701808
chrIV	WBGene00009881	F49C12.12	-1	9320105	9321230	525	24.5086	21.6667	0.884044	0.876934	20.9638	.	232.163	9.47274	158.877	7.33277	.	10.3933	0.424069		12.3833	0.571538		8.7	0.415001
chrII	WBGene00009899	F49E12.6	1	8412360	8416804	3844	52.843	42.794	0.809832	0.462005	51.1825	.	215.203	4.0725	145.8	3.40702	.	17.5567	0.332242		15.9	0.371548		19.42	0.379427
chrI	WBGene00009915	F52A8.1	1	7314593	7318657	3464	36.5186	27.9443	0.765206	0.191633	35.8024	.	246.22	6.74231	182.783	6.54099	.	21	0.575049		15.96	0.571136		15.5867	0.435353
chrI	WBGene00009918	F52A8.5	-1	7345940	7347371	831	11.1462	10.6318	0.953846	0.754803	13.4043	.	87.0433	7.80923	78.2933	7.36409	.	2.87667	0.258085		2.76667	0.260226		2.78	0.207396
chrI	WBGene00009920	abts-1	-1	8296910	8307722	10036	19.516	18.9539	0.971197	0.161466	18.0285	.	148.227	7.59514	108.187	5.70789	.	7.49	0.383788		6.90667	0.364394		4.33333	0.24036
chrI	WBGene00009923	F52B5.7	-1	8313221	8315336	1366	7.38324	8.33529	1.12895	0.0998042	4.97877	.	41.8467	5.6678	64.75	7.76818	.	6.88667	0.932744		5.27	0.632252		3.97333	0.798055
chrIV	WBGene00009926	noah-2	1	14089976	14096599	5781	80.1305	71.4493	0.891662	0.626957	72.5678	.	361.282	4.50867	317.374	4.44194	.	10.2933	0.128457		11.8567	0.165945		13.16	0.181348
chrX	WBGene00009930	F52D10.2	-1	11589618	11600498	10269	21.6843	38.6001	1.7801	2.46188e-19	21.7758	.	158.783	7.3225	270.69	7.01267	.	9.28	0.42796		16.8367	0.436182		8.34667	0.3833
chrI	WBGene00009939	ztf-11	-1	9904294	9910628	5728	55.4005	40.9777	0.739662	0.114594	48.8616	.	110.247	1.99001	153.989	3.75789	.	27.05	0.488263		22.9533	0.560143		13.38	0.273834
chrII	WBGene00009945	bath-38	-1	10042800	10045110	1699	21.9879	16.5285	0.75171	0.248322	17.94	.	61.66	2.80427	80.16	4.84979	.	14.8933	0.677341		16.3067	0.986576		18.1267	1.01041
chrII	WBGene00009946	F52H3.4	1	10040022	10042456	1796	2.70295	1.67622	0.620146	0.364224	3.09187	.	2.30667	0.853388	2.01333	1.20111	.	5.75333	2.12854		5.30333	3.16386		7.12667	2.30497
chrIII	WBGene00009951	F53A2.3	-1	13336800	13340496	2186	6.09126	8.15851	1.33938	0.00220122	8.2269	.	26.018	4.27136	27.9676	3.42803	.	1.57667	0.258841		3.09333	0.379154		1.93333	0.235001
chrIII	WBGene00009953	F53A2.9	-1	13356722	13359851	2425	7.56784	3.49423	0.461721	0.00027687	6.50227	.	10.1733	1.34429	5.82927	1.66826	.	6.13333	0.810448		5.16333	1.47768		8.83333	1.3585
chrV	WBGene00009973	F53C11.3	1	13782435	13784501	1465	12.33	18.1959	1.47574	0.00233965	19.3761	.	20.8967	1.69478	32.92	1.8092	.	4.19	0.339821		7.57	0.416028		6.52667	0.336841
chrV	WBGene00009976	swan-2	-1	13800977	13804263	2674	44.8181	46.0481	1.02744	0.0619595	52.3153	.	121.987	2.72182	194.07	4.21451	.	230.65	5.14636		251.133	5.45372		238.577	4.56036
chrV	WBGene00009977	swan-1	-1	13804382	13808519	3536	55.5291	40.2152	0.724218	0.0447431	46.8238	.	473.633	8.52946	333.71	8.2981	.	50.7367	0.913695		47.7	1.18612		32.4533	0.693095
chrV	WBGene00009978	F53E4.1	-1	15652419	15659840	6615	7.10325	5.10854	0.719184	0.133087	7.80937	.	65.7207	9.2522	51.5276	10.0866	.	2.97333	0.418588		2.75	0.538314		2.29333	0.293664
chrV	WBGene00009979	cutl-1	-1	13404018	13406720	2057	0.79509	0.414682	0.521553	0.348224	0.702479	.	0.606667	0.763016	0.931507	2.24632	.	3.81	4.79191		1.87333	4.51752		3.01333	4.28957
chrV	WBGene00009980	F53F1.2	1	13406804	13408172	768	16.6589	8.41732	0.505276	0.158927	12.9206	.	103.723	6.22632	48.0467	5.70807	.	6.94667	0.416995		3.67333	0.436402		5.8	0.448897
chrV	WBGene00009987	F53F4.3	1	13592029	13593177	548	14.8084	8.05839	0.544177	0.0190384	12.7263	.	46.6833	3.15249	29.61	3.67443	.	5.40667	0.365108		8.92333	1.10733		11	0.864353
chrV	WBGene00009992	F53F4.10	-1	13624610	13625762	552	12.6449	13.2817	1.05036	0.229535	15.3025	.	35.41	2.80033	45.6467	3.43681	.	5.62333	0.444711		7.98	0.600827		3.74667	0.24484
chrV	WBGene00010002	F53F8.5	-1	20700528	20704074	1890	8.87328	6.04233	0.680958	0.0941566	10.8386	.	71.95	8.10861	73.6967	12.1967	.	2.69	0.303157		1.94	0.321068		1.92667	0.177759
chrV	WBGene00010006	F53H2.3	-1	20397214	20409124	8998	41.5934	27.7887	0.668104	0.00456703	36.6626	.	95.8904	2.30543	133.134	4.79093	.	29.4094	0.70707		25.3389	0.911844		29.2282	0.797221
chrII	WBGene00010015	atad-3	1	10248546	10251111	1965	14.658	8.35852	0.570236	0.00266773	15.3766	.	119.78	8.17164	47.9667	5.73865	.	3.63	0.247646		4.02667	0.481744		3.01333	0.195969
chrX	WBGene00010028	F54B11.5	-1	13594054	13596100	1446	14.4609	27.9001	1.92934	1.02501e-11	14.5387	.	49.66	3.43408	92.5667	3.31779	.	3.46667	0.239726		4.90333	0.175746		2.16667	0.149027
chrIII	WBGene00010037	F54C8.4	-1	9441470	9443535	1465	78.0584	97.2802	1.24625	2.08496e-05	72.6048	.	358.923	4.59814	388.253	3.99108	.	93.4233	1.19684		95.4733	0.981426		144.213	1.98628
chrIII	WBGene00010038	rheb-1	-1	9454260	9456187	1327	30.6696	28.1895	0.919137	0.57607	26.5554	.	124.07	4.04538	78.37	2.78011	.	10.2367	0.333773		9.28	0.3292		6.38	0.240253
chrIII	WBGene00010039	F54C8.6	-1	9444325	9450939	5205	27.0976	21.3976	0.789649	0.541632	23.0436	.	223.953	8.26469	282.5	13.2024	.	14.0633	0.518988		17.6767	0.826105		19.54	0.847957
chrII	WBGene00010044	F54C9.9	1	8577890	8581463	2966	17.4503	9.49005	0.543834	8.0412e-05	15.0775	.	127.49	7.3059	111.487	11.7477	.	4.79866	0.27499		1.67785	0.176801		2.91946	0.19363
chrII	WBGene00010045	F54C9.11	-1	8582979	8587905	4285	16.4156	11.2313	0.684181	0.0363073	12.397	.	39.6733	2.4168	27.8367	2.4785	.	13.2433	0.806751		12.3733	1.10169		13.5333	1.09166
chrII	WBGene00010051	F54D5.5	-1	11564379	11567186	2086	63.0978	46.1016	0.730638	0.0674829	58.8931	.	233.503	3.70066	301.823	6.54691	.	40.55	0.642653		36.4333	0.790283		42.48	0.721307
chrII	WBGene00010052	F54D5.7	1	11547433	11549612	1289	20.0093	25.7998	1.28939	0.000337913	37.1823	.	82.7	4.13308	100.419	3.89221	.	282.053	14.0961		340.023	13.1793		266.403	7.16479
chrII	WBGene00010053	F54D5.9	-1	11542578	11545330	2149	1.83713	1.59376	0.867528	0.96786	2.73011	.	77.51	42.1907	61.8333	38.797	.	3.55	1.93236		3.81667	2.39475		1.93333	0.708153
chrII	WBGene00010057	F54D5.15	-1	11558649	11564236	4692	5.09633	3.72549	0.731014	0.26221	4.64621	.	7.55263	1.48197	4.99333	1.34032	.	225.887	44.3234		267.423	71.7821		162.287	34.9289
chrX	WBGene00010059	F54E4.3	-1	14632023	14636618	3850	22.1988	34.3873	1.54906	9.77136e-11	16.3283	.	106.421	4.79399	234.402	6.81655	.	11.8467	0.533662		21.57	0.627267		9.18	0.562214
chrII	WBGene00010070	F54F11.2	1	13507748	13516411	6936	5.96489	9.86253	1.65343	3.0701e-09	5.61577	.	35.5667	5.96267	43.0135	4.36131	.	2.94	0.492884		3.51	0.355892		3.86667	0.688537
chrV	WBGene00010075	F55A11.1	-1	11763120	11764441	721	35.7198	25.285	0.707871	0.335826	24.6519	.	124.787	3.49348	79.12	3.12913	.	9.88	0.276597		9.78667	0.387054		5.78667	0.234735
chrV	WBGene00010077	F55A11.4	1	11770187	11773477	2676	2.11902	2.19189	1.03439	0.456684	3.24738	.	17.4967	8.25696	13.2333	6.03741	.	61.82	29.1739		66.5167	30.3467		107.933	33.237
chrV	WBGene00010094	tsfm-1	-1	12270252	12271623	771	12.9617	5.1939	0.40071	0.000101568	11.5305	.	42.15	3.25188	13.8008	2.65711	.	3.97333	0.306543		2.59667	0.499945		5.68	0.492607
chrV	WBGene00010100	F55C9.3	-1	19286980	19288139	525	14.6886	17.0971	1.16398	0.0785982	16.7276	.	83.9625	5.71618	93.0897	5.44475	.	14.0641	0.957486		17.5	1.02356		24.641	1.47307
chrIII	WBGene00010130	vha-14	1	9507934	9509694	1160	38.1228	36.6672	0.961818	0.254833	34.4547	.	311.633	8.17445	257.797	7.03071	.	9.61667	0.252255		14.3067	0.390176		15.2267	0.441932
chrIII	WBGene00010131	F55H2.5	1	9511164	9512870	1046	35.5478	26.2949	0.739706	0.18754	34.7959	.	79.2276	2.22876	89.6931	3.41104	.	35.63	1.00231		37.92	1.4421		35.6167	1.02359
chrIV	WBGene00010149	F56D5.5	-1	9407199	9408320	521	1.74088	2.79942	1.60805	0.126045	1.35317	.	5.83667	3.3527	9.71333	3.46976	.	1.19333	0.685476		2.88	1.02878		0.966667	0.714374
chrIV	WBGene00010175	F56H11.2	-1	9531251	9535217	3366	14.8592	20.5621	1.3838	3.06712e-06	12.6842	.	56.8067	3.823	106.493	5.17911	.	1.70667	0.114856		4.61333	0.224361		3.74667	0.295381
chrV	WBGene00010177	F57A8.1	1	10037094	10047760	10062	33.3662	28.0167	0.839674	0.808752	33.2937	.	134.327	4.02583	108.7	3.87982	.	5.91	0.177125		5.83667	0.208328		6.16	0.18502
chrV	WBGene00010189	F57B1.6	1	13209805	13213448	3043	16.3605	16.6319	1.01659	0.12466	12.1479	.	103.447	6.32295	107.207	6.44583	.	3.91	0.23899		3.71	0.223065		1.93333	0.15915
chrV	WBGene00010192	F57B7.2	-1	11441896	11445423	2925	27.1109	19.6636	0.725301	0.109873	16.7938	.	83.0067	3.06174	92.83	4.72091	.	18.4867	0.68189		13.8967	0.706721		18.5933	1.10715
chrX	WBGene00010199	bet-2	1	10568933	10575659	5996	48.0808	67.243	1.39854	1.00794e-09	50.1614	.	121.024	2.51709	219.326	3.2617	.	24.01	0.499368		37.5467	0.558373		33.3233	0.664322
chrX	WBGene00010221	F57G12.1	-1	12170118	12171906	1188	132.133	182.559	1.38164	0.0995587	129.944	.	457.163	3.45988	971.087	5.31929	.	112.7	0.852931		164.327	0.900127		143.797	1.1066
chrX	WBGene00010222	F57G12.2	-1	12156403	12160313	3182	17.9104	36.736	2.0511	5.93684e-20	12.3162	.	53.5367	2.98913	77.6433	2.11355	.	3.70333	0.20677		9.62667	0.26205		2.65333	0.215435
chrIV	WBGene00010232	F58B3.6	1	11636003	11638186	1583	21.6178	20.084	0.929049	0.457593	26.0985	.	55.0567	2.54682	44.7067	2.22598	.	9.49333	0.439144		12.84	0.639314		15.8467	0.607186
chrI	WBGene00010242	F58D5.2	-1	12065938	12069089	1595	5.4815	4.76144	0.868638	0.912833	4.99937	.	71.4767	13.0396	47.91	10.0621	.	3.55667	0.648849		3.12667	0.656664		4.22667	0.845439
chrI	WBGene00010244	F58D5.5	1	12040086	12042977	2145	119.663	129.882	1.0854	0.00212635	99.4149	.	197.26	1.64846	255.943	1.97058	.	34.1633	0.285495		55.5133	0.427413		30.4467	0.306259
chrV	WBGene00010251	sta-2	1	9741051	9744206	2553	10.1902	8.46827	0.831024	0.927385	5.3917	.	26.4233	2.59302	28.8224	3.40357	.	2.29667	0.225381		2.87667	0.339699		2.29333	0.425345
chrV	WBGene00010259	F58E10.1	-1	13987156	14006932	18272	12.841	12.2694	0.955483	0.214547	11.7091	.	126.403	9.8437	113.32	9.23598	.	8.38667	0.653114		9.94	0.810145		10.38	0.886489
chrV	WBGene00010260	F58E10.3	-1	14008733	14012202	2852	58.8899	53.1606	0.902711	0.603018	69.3608	.	345.67	5.86977	400.943	7.54212	.	69.33	1.17728		79.9367	1.50368		82.2067	1.1852
chrII	WBGene00010264	F58G1.2	-1	12915365	12919220	2136	9.49906	10.7537	1.13208	0.0523042	12.8614	.	41.3085	4.34869	44.2411	4.11402	.	0.908784	0.0956709		1.82432	0.169645		0.858108	0.0667195
chrIV	WBGene00010272	amph-1	-1	9644228	9647917	3089	22.1031	14.4196	0.652377	0.0161163	19.5953	.	88.7467	4.01512	103.557	7.18168	.	9.50667	0.430105		6.76	0.468808		5.92	0.302113
chrIV	WBGene00010273	srm-3	1	9648070	9650485	1815	1.72617	0.438843	0.254229	0.0113113	1.9157	.	0.409396	0.23717	0.294355	0.670752	.	3.11	1.80168		1.15	2.62053		2.42	1.26324
chrV	WBGene00010279	letm-1	1	13660867	13664224	2757	14.6979	8.39572	0.571221	0.0841743	15.1153	.	175.237	11.9226	111.04	13.2258	.	8.34333	0.567656		7.83667	0.933412		7.73333	0.511621
chrV	WBGene00010280	F58G11.2	1	13665253	13669276	3421	26.708	24.797	0.928449	0.569406	30.8091	.	75.53	2.82799	70.1933	2.83072	.	20.1067	0.752834		29.42	1.18643		34.3133	1.11374
chrV	WBGene00010284	aman-2	-1	11927633	11933328	5072	14.1116	10.0081	0.70921	0.0628283	12.8937	.	128.337	9.09441	101.383	10.1301	.	7.72	0.547068		9.12667	0.911929		13.18	1.0222
chrV	WBGene00010288	F58H1.5	1	11955740	11962681	6336	78.1615	63.0385	0.806517	0.564648	69.9153	.	526.66	6.7381	361.427	5.73343	.	45.1967	0.578247		75.5467	1.19842		47.7933	0.683589
chrIII	WBGene00010303	cri-3	1	3396372	3397664	692	37.8302	26.0043	0.687396	0.176617	42.1431	.	244.211	6.45546	93.3826	3.59104	.	9.85667	0.26055		11.6533	0.44813		15.48	0.36732
chrIII	WBGene00010310	F59B2.8	-1	9007897	9010104	1607	31.2735	32.0442	1.02464	0.170358	27.1469	.	328.203	10.4946	302.83	9.45039	.	48.18	1.5406		31.6033	0.986242		49.0067	1.80524
chrIII	WBGene00010311	F59B2.9	-1	9010667	9012287	1020	46.0113	46.6779	1.01449	0.149026	36.3284	.	214.4	4.65973	175.137	3.75202	.	30.12	0.654622		27.2767	0.584359		19.67	0.541449
chrIV	WBGene00010317	idh-1	-1	9439070	9441082	1408	58.2138	70.93	1.21844	0.00589244	94.4151	.	256.263	4.40211	294.3	4.14916	.	59.6	1.02381		60.4367	0.85206		45.78	0.48488
chrII	WBGene00010318	F59B10.2	-1	10507209	10509796	1984	5.71295	6.92162	1.21157	0.0403975	5.20464	.	24.44	4.278	40.3933	5.83582	.	1.80667	0.31624		3.26667	0.471951		4.47333	0.85949
chrX	WBGene00010330	F59D12.2	-1	15672780	15675741	1508	6.05471	7.87467	1.30059	0.0111237	3.84748	.	14.4161	2.38097	33.8733	4.30156	.	4.80201	0.793104		5.13423	0.651993		5.5906	1.45306
chrX	WBGene00010339	acl-1	1	15849495	15851702	1397	6.80315	14.117	2.07507	3.56607e-09	7.49606	.	33.8733	4.97907	41.3633	2.93003	.	4.29667	0.63157		11.5667	0.819341		2.54	0.338845
chrIV	WBGene00010350	H01G02.3	-1	11783918	11793341	8663	6.19641	4.79967	0.774588	0.326054	4.93213	.	54.264	8.75733	41.376	8.6206	.	1.79	0.288877		1.07667	0.224321		2.65333	0.53797
chrI	WBGene00010369	H06O01.2	-1	7009142	7015739	5992	19.7199	13.6354	0.691456	0.0209452	19.87	.	99.79	5.06038	106.633	7.82031	.	243.543	12.3501		301.513	22.1125		321.14	16.1621
chrIV	WBGene00010374	rga-5	1	13826687	13844953	16935	7.53661	5.58975	0.74168	0.223002	5.70381	.	60.2267	7.99121	25.93	4.63884	.	4.05333	0.537819		1.52	0.271926		2.89333	0.507263
chrV	WBGene00010382	H12D21.6	-1	14897269	14899660	1327	5.31462	4.51658	0.84984	0.96441	5.07234	.	4.68667	0.881844	4.25333	0.941716	.	3.08333	0.580161		2.70667	0.599274		4.1	0.808305
chrV	WBGene00010383	H12D21.7	1	14895650	14899004	1628	11.0857	6.68857	0.603352	0.391785	13.3729	.	44.71	4.03313	31.5033	4.71002	.	2.51	0.226418		1.69667	0.253666		1.69333	0.126625
chrV	WBGene00010386	H12D21.10	1	14899780	14911852	6212	5.56479	3.39078	0.609326	0.00212506	4.9509	.	26.604	4.78077	10.1275	2.98678	.	6.57333	1.18124		3.71667	1.09611		6.38	1.28865
chrIV	WBGene00010388	srz-42	1	14128494	14131036	1936	1.76937	0.636105	0.35951	0.0274588	0.820248	.	1.84667	1.04369	0.626667	0.985162	.	3.98333	2.25127		2.01333	3.16509		2.04667	2.49518
chrV	WBGene00010405	H19N07.1	-1	11110045	11113299	2379	11.5544	6.43674	0.557079	0.00141323	11.0748	.	60.0789	5.19964	25.4276	3.95039	.	4.65333	0.402731		3.08333	0.479021		7.74667	0.699485
chrV	WBGene00010406	math-33	1	11113416	11118802	4774	17.9167	14.2929	0.797742	0.43948	20.7411	.	65.29	3.64408	48.5833	3.39911	.	7.05667	0.393859		5.57333	0.389936		3.73333	0.179997
chrV	WBGene00010408	mboa-2	-1	11119791	11122560	2154	22.6959	18.6476	0.821629	0.714626	26.3858	.	100.707	4.43722	82.9567	4.44864	.	112.057	4.93731		35.24	1.88978		78.6033	2.979
chrI	WBGene00010416	H25P06.1	-1	11311509	11323217	6858	9.64108	8.11425	0.841633	0.849199	9.08778	.	95.3167	9.88652	90.3333	11.1327	.	2.49	0.25827		2.98667	0.368077		1.57333	0.173126
chrI	WBGene00010419	H28O16.1	1	12652334	12654636	1634	50.2472	36.9774	0.735908	0.283053	64.4308	.	503.823	10.0269	285.66	7.72527	.	42.3633	0.843098		30.6067	0.827714		29.2133	0.453406
chrX	WBGene00010423	H36L18.1	1	12647120	12651417	3689	3.43115	4.37327	1.27458	0.0187033	2.74221	.	14.9867	4.36783	24.5867	5.62203	.	0.683333	0.199156		1.63667	0.374243		0.36	0.131281
chrV	WBGene00010425	lpin-1	-1	13650274	13655309	4267	26.7105	18.4607	0.691143	0.117755	24.0593	.	141.007	5.27908	152.767	8.27522	.	15.17	0.567942		8.89	0.481562		8.56	0.355788
chrI	WBGene00010427	H37N21.1	-1	7140277	7149647	8685	28.0192	27.4396	0.979313	0.118168	30.8994	.	145.87	5.20608	199.623	7.27502	.	41.91	1.49576		56.2067	2.04838		32.2	1.04209
chrIII	WBGene00010428	dcn-1	1	4313625	4317550	3178	31.2008	36.2659	1.16234	0.000889793	38.5634	.	119.858	3.8415	117.288	3.23413	.	8.32	0.26666		11.2	0.30883		6.16	0.159737
chrX	WBGene00010433	H40L08.1	-1	15080709	15083891	2582	17.269	25.11	1.45405	4.82008e-07	15.5287	.	72.4233	4.19384	106.11	4.22581	.	9.90333	0.573475		12.26	0.488252		6.16	0.396686
chrIV	WBGene00010442	JC8.12	1	13256070	13259041	2320	7.18341	4.92435	0.685518	0.170894	4.68922	.	31.1433	4.33546	23.5133	4.77491	.	1.21	0.168444		0.833333	0.169227		3.14667	0.671042
chrII	WBGene00010459	K01C8.7	1	8276292	8277561	669	8.63602	4.56278	0.528343	0.0343566	4.88789	.	12.2867	1.42272	10.7733	2.36113	.	1.87667	0.217307		1.07667	0.235967		0.846667	0.173217
chrV	WBGene00010461	K01D12.1	1	12377540	12378905	762	17.4606	2.73228	0.156483	0.00390081	9.14961	.	39.3233	2.25211	8.61364	3.15254	.	3.86	0.221069		1.38667	0.507512		3.38	0.369415
chrV	WBGene00010465	K01D12.6	-1	12398739	12400795	1456	9.68922	5.03984	0.520149	0.00533451	8.17582	.	58.7733	6.06585	43.4433	8.61999	.	1.67	0.172357		2.53	0.502001		1.32667	0.162267
chrIII	WBGene00010478	K01G5.5	1	10748126	10749985	1259	30.6346	24.8217	0.810249	0.68702	37.5512	.	92.9013	3.03256	81.3289	3.27653	.	9.46333	0.30891		8.98667	0.362049		10.7467	0.286187
chrIII	WBGene00010480	K01G5.9	1	10759269	10762914	3044	23.0087	31.6978	1.37764	7.72709e-07	34.2797	.	124.013	5.38984	119.84	3.78071	.	20.1067	0.873872		44.7433	1.41156		28.5	0.831395
chrI	WBGene00010488	K02A11.3	-1	9745958	9747952	1394	3.7543	2.96341	0.789338	0.732101	2.54161	.	15.5245	4.13511	13.1157	4.42586	.	1.67	0.444823		1.45333	0.490425		2.05333	0.807888
chrII	WBGene00010491	K02B7.3	-1	14694162	14697929	3162	11.6417	8.09994	0.69577	0.125226	9.57717	.	69.4312	5.96401	43.2692	5.34192	.	5.87333	0.504509		3.57333	0.441156		5.56	0.580548
chrI	WBGene00010496	sec-12	-1	8509109	8511409	1692	18.2089	12.9282	0.709992	0.123308	14.9267	.	123.023	6.75621	78.0933	6.04055	.	45.5333	2.50061		29.1733	2.25657		34.14	2.28717
chrV	WBGene00010507	K02E2.6	1	20380554	20382005	847	28.6547	27.3176	0.953338	0.532896	31.6635	.	91.4934	3.19297	79.0263	2.89287	.	10.9067	0.380626		10.9216	0.399803		12.0299	0.379928
chrV	WBGene00010524	K03B8.6	1	11404747	11409522	4175	7.49066	10.0008	1.33511	0.000322369	5.9521	.	20.7633	2.7719	27.6567	2.76543	.	6.04333	0.806783		12.9967	1.29956		2.77333	0.465942
chrV	WBGene00010536	K03D7.9	-1	17487320	17489044	637	0.189953	0.131868	0.694215	0.80306	0.141287	.	0.4	2.10579	0.243333	1.84528	.	14.6536	77.1432		22.5071	170.679		16.5286	116.986
chrII	WBGene00010550	K04B12.2	-1	14434376	14439699	4650	56.6315	42.408	0.74884	0.0749592	48.9946	.	283.147	4.99981	248.713	5.86478	.	3.36667	0.0594487		0.626667	0.0147771		2.17333	0.0443586
chrX	WBGene00010552	K04C1.2	1	14238483	14241269	2185	19.8462	32.8206	1.65375	1.99937e-10	23.4654	.	58.2567	2.9354	85.97	2.61939	.	5.85667	0.295102		7.18333	0.218867		6.28667	0.267912
chrX	WBGene00010553	K04C1.3	-1	14241500	14244592	2492	17.1439	32.5072	1.89614	6.52263e-15	18.638	.	58.8367	3.43194	151.91	4.67312	.	3.46	0.201822		3.4	0.104592		1.32	0.0708229
chrIV	WBGene00010558	K04D7.4	-1	10183829	10194955	10526	12.9004	8.77451	0.680172	0.253349	11.1574	.	67.69	5.24711	44.7333	5.0981	.	5.36667	0.416007		5.35	0.609721		3.86667	0.346556
chrI	WBGene00010560	iftb-1	-1	8026601	8028777	1575	23.5257	22.4543	0.954457	0.331147	22.3003	.	95.8	4.07214	89.7467	3.99686	.	10.1333	0.430734		8.85	0.394134		8.81333	0.395211
chrI	WBGene00010561	K04G2.2	1	8028876	8032872	3382	30.1965	20.0588	0.664277	0.0210293	26.3485	.	120.88	4.00312	75.4167	3.75977	.	21.8433	0.723373		24.8267	1.23769		12.1533	0.461254
chrX	WBGene00010572	wdr-5.2	1	14349848	14352078	1630	10.8706	19.3291	1.77812	2.78693e-06	11.0521	.	17.3333	1.59452	25.8667	1.33822	.	9.55333	0.878827		14.9067	0.771202		8.68667	0.785971
chrIII	WBGene00010573	K04H4.2	-1	9347630	9355546	7316	29.194	31.058	1.06385	0.00980338	30.0957	.	76.2467	2.61172	109.393	3.52222	.	11.3033	0.38718		18.1567	0.584605		7.11333	0.236357
chrI	WBGene00010583	K05C4.7	1	14737533	14738784	651	24.5707	20.2335	0.823482	0.78853	31.8894	.	315.804	12.8529	185.112	9.14879	.	16.5933	0.675331		10.7967	0.533604		6.75333	0.211774
chrI	WBGene00010585	K05C4.9	-1	14726867	14731592	3826	40.9741	62.7065	1.53039	7.39728e-11	52.1985	.	54.5333	1.33092	128.76	2.05338	.	13.2067	0.322317		16.64	0.265363		15.3533	0.294134
chrV	WBGene00010593	gsnl-1	1	9497028	9499354	1726	5.07126	2.48841	0.490689	0.0144348	3.77694	.	23.1033	4.55574	10.5267	4.23027	.	2.99667	0.590911		0.936667	0.376411		2.41333	0.638965
chrI	WBGene00010621	K07A12.2	-1	8676657	8682340	4939	16.5119	11.6207	0.703774	0.0444925	14.0946	.	76.4367	4.62917	76.09	6.54781	.	9.48	0.57413		13.5367	1.16488		8.30667	0.589353
chrI	WBGene00010624	K07A12.7	-1	8691036	8692603	967	10.7849	5.71923	0.5303	0.0115481	9.71562	.	83.9167	7.78094	40.58	7.09535	.	4.81333	0.446303		2.19	0.382918		2.29333	0.236046
chrV	WBGene00010627	K07C5.4	-1	10350448	10353135	2085	38.5662	20.7988	0.539301	4.68591e-06	38.9058	.	66.8467	1.7333	42.1433	2.02624	.	23.3033	0.604243		7.84	0.376945		18.9133	0.486132
chrV	WBGene00010629	K07C5.6	-1	10353563	10356077	1914	6.71839	5.50313	0.819115	0.835498	9.3187	.	97.5967	14.5268	44.7433	8.13052	.	7.99667	1.19027		5.76333	1.04728		5.91333	0.634566
chrV	WBGene00010631	cash-1	1	10362014	10365354	2740	30.281	25.7016	0.848771	0.924834	28.873	.	104.217	3.44165	119.427	4.64666	.	27.2667	0.900454		18.7767	0.730563		28.0533	0.971612
chrV	WBGene00010632	K07C5.9	-1	10346639	10350271	2794	1.86346	2.81836	1.51244	0.0121483	1.88869	.	6.07667	3.26096	7.8	2.76757	.	54.43	29.2091		22.4567	7.96799		51.7367	27.3929
chrI	WBGene00010641	crml-1	-1	7152458	7158090	5014	27.9661	21.014	0.751408	0.117544	26.1775	.	160.487	5.73862	139.8	6.65272	.	27.3	0.976182		21.8133	1.03804		20.5267	0.784134
chrIII	WBGene00010664	K08E3.4	-1	13759344	13763231	3269	23.6915	20.6084	0.869867	0.884203	26.8313	.	130.56	5.51084	111.8	5.42496	.	16.4633	0.694905		18.9567	0.91985		26.18	0.975726
chrIII	WBGene00010665	K08E3.5	-1	13763963	13768315	3752	30.302	33.8862	1.11828	0.00324603	45.6539	.	89.6067	2.95712	90.5133	2.6711	.	111.507	3.67985		51.1333	1.50897		87.94	1.92623
chrIV	WBGene00010670	K08E4.6	-1	12077079	12078388	709	13.5339	6.74612	0.498463	0.0050926	12.299	.	86.1133	6.36281	44.56	6.60528	.	2.34667	0.173392		1.21	0.179362		2.65333	0.215735
chrIV	WBGene00010677	K08F4.2	-1	10126736	10129122	1786	32.8186	23.8816	0.727685	0.122584	35.2956	.	111.38	3.39381	69.8233	2.92373	.	20.56	0.626474		18.91	0.791824		15.3333	0.434426
chrII	WBGene00010681	K08F8.1	1	8743713	8747182	2869	39.5702	36.7532	0.92881	0.426871	32.271	.	201.633	5.09558	215.03	5.85064	.	29.0167	0.733295		26.5733	0.72302		16.3	0.505097
chrV	WBGene00010685	aipl-1	-1	15134166	15136921	2061	6.97259	4.84474	0.694826	0.21418	7.35323	.	20.6633	2.96351	15.31	3.16013	.	1.38667	0.198874		0.9	0.185769		0	0
chrV	WBGene00010687	K08F9.4	1	15144048	15146414	1760	11.0062	6.25426	0.568246	0.00882034	9.38636	.	64.9167	5.89816	34.5	5.51624	.	4.88667	0.44399		2.04333	0.326711		3.86667	0.411945
chrX	WBGene00010691	K08H2.4	1	13238578	13239934	752	8.88098	14.6636	1.65112	0.000177214	10.7154	.	24.9333	2.8075	34.4633	2.35027	.	10.7067	1.20557		17.9967	1.22731		20.18	1.88327
chrX	WBGene00010700	nipi-3	1	15607176	15610563	2785	34.767	87.3456	2.51232	1.29279e-11	30.6285	.	114.807	3.30218	297.077	3.40116	.	26.94	0.774873		42.2167	0.483329		29.94	0.977519
chrX	WBGene00010701	ent-2	1	15599717	15603695	3050	34.5528	54.7579	1.58476	9.62603e-13	44.2851	.	184.217	5.33146	183.21	3.34582	.	6.05333	0.175191		16.3	0.297674		11.8467	0.267509
chrX	WBGene00010702	usp-33	1	15590714	15595286	3779	6.65348	11.8574	1.78213	1.64467e-09	7.49034	.	17.1842	2.58274	42.9671	3.62366	.	1.7363	0.260961		2.63699	0.222392		3.60274	0.480985
chrIV	WBGene00010713	uso-1	-1	13446008	13454825	7099	23.787	22.0502	0.926986	0.376447	22.8948	.	77.9833	3.2784	109.513	4.96654	.	15.19	0.638584		32.4533	1.47179		10.8467	0.473762
chrIV	WBGene00010714	K09B11.10	-1	13434218	13445284	5556	7.30337	3.95725	0.54184	1.29161e-05	6.23812	.	18.1283	2.48219	10.6047	2.6798	.	64.04	8.76856		80.44	20.3272		66.1667	10.6068
chrX	WBGene00010725	erv-46	-1	15613737	15616544	2071	13.3947	18.4597	1.37813	4.87329e-05	16.2248	.	66.5733	4.97011	99.2233	5.37514	.	4.09333	0.305593		8.50333	0.460644		5.07333	0.312691
chrI	WBGene00010730	K10C3.2	-1	9850011	9853845	3234	25.6075	20.6512	0.806453	0.633911	23.5617	.	81.77	3.19321	84.9933	4.11566	.	13.3633	0.521853		8.37	0.405303		9.76	0.414232
chrI	WBGene00010731	K10C3.4	1	9854304	9862394	7465	39.1681	28.1769	0.719383	0.0266431	35.6387	.	98.3567	2.51114	134.933	4.78879	.	18.9533	0.483897		18.1033	0.642489		15.7	0.440532
chrI	WBGene00010738	K10D3.4	-1	7134742	7139898	4556	52.5045	47.7052	0.908593	0.529789	44.8637	.	75.6667	1.44115	77.9433	1.63385	.	74.3167	1.41543		122.437	2.56653		79.7033	1.77657
chrV	WBGene00010742	K10D6.2	-1	11193717	11198900	4578	29.2296	23.6709	0.809828	0.543928	19.4185	.	107.363	3.67311	73.22	3.09325	.	2.76	0.0944249		1.97667	0.0835061		2.16	0.111234
chrIII	WBGene00010756	K10G9.2	1	10284322	10288520	3582	10.1093	5.7648	0.570247	0.00195782	7.97097	.	31.4966	3.11561	18.8167	3.26406	.	3.31	0.327421		1.07	0.185609		1.08	0.135492
chrII	WBGene00010758	K10H10.1	1	14488800	14492825	3366	10.8831	4.8265	0.443486	2.93619e-06	7.30095	.	25.5933	2.35166	20.1	4.16451	.	7.36	0.676278		4.72	0.977934		9.54667	1.30759
chrII	WBGene00010759	K10H10.2	-1	14492752	14495339	1832	64.5903	114.374	1.77076	2.53627e-18	51.4847	.	129.849	2.01035	325.95	2.84985	.	17.7633	0.275015		44.9333	0.392863		8.08	0.15694
chrX	WBGene00010776	pix-1	1	13727065	13733601	5656	9.31948	12.6197	1.35412	1.21626e-05	10.7905	.	22.6933	2.43504	78.3133	6.20564	.	5.23667	0.561905		4.32667	0.34285		5.68	0.52639
chrIII	WBGene00010778	gpdh-2	-1	9853988	9859184	4532	26.8242	11.0488	0.411895	1.69846e-14	15.5852	.	59.9539	2.23507	26.4868	2.39727	.	7.87	0.293391		4.37333	0.395821		8.56667	0.549668
[truncated: 2,018 more rows]

## Sheet: Wild.Type.StarvedL1
Chromosome	WBGeneID	Gene Name	Strand	True TSS Begin	True TSS End	Uniquely mappable bases within gene body (excluding 300 bp on either end)	Wild-Type Starved L1: Gene Body Expression	.	Wild-Type Starved L1: 3' - Maximum 200bp GRO-seq Signal Average	Wild-Type Starved L1: 3'-Pausing Ratio	.	Wild-Type Starved L1: 5' - Maximum GRO-seq Signal Average	Wild-Type Starved L1: 5'-Pausing Ratio	Wild-Type Starved L1: Paused?
chrI	WBGene00000006	aat-5	-1	2571778	2577110	4049	34.501	.	104.479	3.0283	.	45.3333	1.31397
chrX	WBGene00000018	abl-1	-1	10605769	10624261	16658	6.71071	.	42.7233	6.36644	.	2.31	0.344226
chrI	WBGene00000036	ace-2	-1	3302094	3307926	4793	33.256	.	206.94	6.22264	.	21.0467	0.632868
chrX	WBGene00000040	aco-1	1	11339733	11343504	3171	16.2988	.	48.0367	2.94725	.	16.2	0.993938
chrIII	WBGene00000041	aco-2	1	7973440	7977260	3220	32.1256	.	108.593	3.38027	.	51.4933	1.60287
chrV	WBGene00000063	act-1	1	11078572	11082479	2147	37.2396	.	276.382	7.42172	.	8.33	0.223686
chrV	WBGene00000064	act-2	-1	11076719	11078503	288	86.967	.	194.743	2.23928	.	75.19	0.864581
chrV	WBGene00000065	act-3	-1	11071666	11075667	2187	34.9893	.	135.75	3.87976	.	64.07	1.83113
chrX	WBGene00000066	act-4	1	4960589	4964385	2425	57.2524	.	151.683	2.64938	.	898.9	15.7007	Y
chrIII	WBGene00000067	act-5	-1	13604238	13606141	1168	13.6836	.	31.2961	2.28711	.	10.0033	0.731043
chrIII	WBGene00000068	acy-1	1	4722090	4730835	8107	16.8728	.	63.5067	3.76384	.	13.26	0.785879
chrIII	WBGene00000070	acy-3	-1	3774875	3786539	10947	6.81634	.	37.9367	5.56555	.	5.86667	0.860677
chrX	WBGene00000074	adm-2	1	13687148	13695721	7061	9.44795	.	49.6791	5.25819	.	24.2433	2.56599	Y
chrX	WBGene00000083	adt-2	1	7585633	7595441	9186	1.92129	.	6.11333	3.18188	.	2.34797	1.22208
chrI	WBGene00000084	aex-1	1	7602306	7608241	5334	5.1797	.	30.8167	5.94951	.	158.747	30.6479
chrX	WBGene00000092	ags-3	-1	5289696	5298213	7875	21.8532	.	112.297	5.13868	.	19.4567	0.890335
chrI	WBGene00000095	aha-1	-1	10193916	10197172	2593	20.6346	.	310.48	15.0466	.	20.7967	1.00785
chrII	WBGene00000101	aka-1	-1	7472685	7478753	5080	19.1691	.	120.47	6.2846	.	16.7467	0.873628
chrV	WBGene00000102	akt-1	1	10246616	10252870	5638	45.4943	.	154.85	3.40372	.	20.24	0.444891
chrX	WBGene00000103	akt-2	1	14145897	14152001	4737	30.1461	.	112.536	3.73304	.	23.8893	0.79245
chrIII	WBGene00000107	alh-1	1	5077327	5080636	2688	21.7902	.	66.0385	3.03065	.	29.1733	1.33883
chrII	WBGene00000112	alh-6	-1	1306247	1310373	3077	17.5879	.	102.863	5.84853	.	8.04667	0.457511
chrII	WBGene00000114	alh-8	1	11728975	11731163	1588	204.8	.	592.286	2.89202	.	329.314	1.60798
chrX	WBGene00000116	alh-10	-1	7140459	7143597	2477	1.69802	.	9.59	5.64775	.	22.2767	13.1192
chrIII	WBGene00000118	alh-12	1	7453898	7455917	1409	22.0593	.	43.7433	1.98299	.	16.4833	0.74723
chrIV	WBGene00000122	aly-3	1	12123091	12124788	1097	24.7106	.	88.4867	3.58092	.	47.58	1.92549
chrV	WBGene00000146	ape-1	1	11674215	11685259	10395	21.1755	.	113.477	5.35887	.	4.14333	0.195667
chrX	WBGene00000149	apl-1	-1	5112403	5116706	3700	53.5046	.	150.537	2.81353	.	67.1633	1.25528
chrI	WBGene00000150	apm-1	-1	5342181	5345328	2545	13.5422	.	89.5233	6.61067	.	28.4333	2.0996
chrX	WBGene00000157	aps-2	1	4458138	4459242	504	9.67956	.	83.63	8.63985	.	5.00333	0.516897
chrIII	WBGene00000160	apb-1	-1	2583965	2597181	11628	15.1768	.	4.36842	0.287835	.	11.1167	0.732477
chrII	WBGene00000170	aqp-2	-1	9258853	9262086	2633	113.131	.	748.69	6.61788	.	82.54	0.729594
chrX	WBGene00000175	aqp-7	1	3024105	3026961	2246	30.9018	.	104.565	3.38379	.	50.5867	1.63701
chrIII	WBGene00000182	arf-1.2	1	5715750	5717538	1125	64.3867	.	155.821	2.42009	.	133.47	2.07294
chrIV	WBGene00000183	arf-3	1	7982254	7983888	971	53.5855	.	247.187	4.61294	.	42.81	0.79891
chrIV	WBGene00000192	arl-8	1	14797548	14799278	1130	27.127	.	68.7315	2.53369	.	24.73	0.911638
chrX	WBGene00000195	arr-1	1	949782	954230	3804	8.85923	.	32.7733	3.69934	.	9.99333	1.12801
chrI	WBGene00000197	aars-2	1	3982986	3986918	3331	11.5279	.	74.45	6.45823	.	16.2467	1.40933
chrI	WBGene00000199	arx-1	-1	2883498	2895171	9174	8.00392	.	71.4233	8.92354	.	15.4533	1.93072
chrIII	WBGene00000201	arx-3	-1	12052328	12058476	3184	21.0696	.	105.639	5.0138	.	13.7695	0.653526
chrX	WBGene00000207	asb-2	1	4469525	4471455	1312	5.50991	.	37.2402	6.75876	.	5.79195	1.05119
chrX	WBGene00000216	asp-3	1	6791134	6792676	940	42.6415	.	59.27	1.38996	.	43.4867	1.01982
chrX	WBGene00000217	asp-4	-1	13218908	13221376	1866	28.3652	.	122.463	4.31738	.	88.1533	3.1078	Y
chrV	WBGene00000219	asp-6	-1	8267526	8269018	820	40.9909	.	73.1111	1.7836	.	18.0633	0.440667
chrX	WBGene00000221	atf-5	-1	14809088	14810754	1066	37.0145	.	71.74	1.93816	.	119.347	3.22432	Y
chrX	WBGene00000222	atf-6	1	12480698	12484811	3511	8.67915	.	55.4	6.38311	.	2.32667	0.268075
chrIV	WBGene00000224	atgp-1	1	17268897	17272147	2650	28.7389	.	65.3933	2.27543	.	26.2601	0.91375
chrIII	WBGene00000229	atp-2	1	5228178	5230505	1727	26.2374	.	78.8533	3.00538	.	10.7267	0.408831
chrIII	WBGene00000231	atx-2	1	10461282	10467953	5983	23.8657	.	89.94	3.76859	.	25.4167	1.06499
chrII	WBGene00000240	pah-1	-1	8762613	8765083	1870	61.2596	.	119.233	1.94636	.	34.7567	0.567367
chrIV	WBGene00000247	bec-1	-1	5661131	5666627	4739	20.8231	.	61.8767	2.97154	.	20.9633	1.00674
chrX	WBGene00000262	bra-1	1	13598188	13599605	817	16.8097	.	27.8733	1.65817	.	11.5867	0.689286
chrIII	WBGene00000273	brp-1	1	12018061	12025225	4804	56.3527	.	352.197	6.24987	.	199.473	3.53973
chrX	WBGene00000281	cah-3	1	16486075	16489323	2518	14.4885	.	44.72	3.08659	.	11.0733	0.764285
chrX	WBGene00000282	cah-4	1	13541375	13544531	2551	70.8947	.	61.8367	0.872232	.	121.75	1.71733
chrV	WBGene00000285	cal-1	-1	12514857	12518935	3468	14.0558	.	112.06	7.97251	.	19.5067	1.3878
chrII	WBGene00000286	cal-2	1	8959958	8961508	936	66.8317	.	258.921	3.87423	.	113.577	1.69944
chrII	WBGene00000293	cap-2	1	10868956	10870928	1372	24.8714	.	204.243	8.21199	.	10.9333	0.439595
chrV	WBGene00000298	cat-4	1	10564304	10566441	1537	28.985	.	49.5333	1.70893	.	25.67	0.885629
chrIV	WBGene00000301	cav-1	1	9772342	9773454	512	6.65039	.	17.1	2.57128	.	10.9867	1.65203
chrIII	WBGene00000366	cbp-1	1	9764792	9774721	8963	92.0544	.	211.88	2.30168	.	74.5567	0.80992
chrIII	WBGene00000369	ccf-1	-1	11918727	11920328	1001	16.8402	.	120.134	7.13379	.	5.99333	0.355895
chrIV	WBGene00000370	ccg-1	-1	15270126	15275771	4965	10.3777	.	54.39	5.24102	.	36.71	3.53738	Y
chrI	WBGene00000371	cco-1	1	9788728	9789956	628	22.2866	.	136.85	6.14045	.	33.5633	1.50599
chrIV	WBGene00000376	ccr-4	1	12361359	12371804	9702	17.5243	.	94.5267	5.39403	.	25.5267	1.45664
chrII	WBGene00000377	cct-1	1	8185229	8187551	1722	16.39	.	56.4633	3.445	.	13.1967	0.805168
chrII	WBGene00000378	cct-2	1	8927432	8929753	1721	14.6987	.	54.97	3.73978	.	11.9133	0.810501
chrIII	WBGene00000381	cct-6	-1	5853488	5855884	1796	26.1957	.	76.15	2.90696	.	16.8567	0.64349
chrII	WBGene00000383	cdc-14	-1	5587606	5593639	5388	84.4589	.	154.437	1.82854	.	63.4267	0.750977
chrII	WBGene00000390	cdc-42	1	7615609	7617884	1672	30.1717	.	138.323	4.58455	.	28.0633	0.930123
chrX	WBGene00000391	cdd-1	-1	8208700	8211093	1789	31.8879	.	19.93	0.625001	.	84.5333	2.65095	Y
chrII	WBGene00000403	casy-1	-1	5945381	5958087	12090	52.1669	.	322.61	6.18419	.	27.3033	0.523385
chrIII	WBGene00000414	cec-1	1	8425385	8428508	2504	22.3255	.	111.7	5.00325	.	49.1	2.19928	Y
chrIV	WBGene00000416	ced-2	1	1596052	1601620	3555	11.0207	.	55.7933	5.06261	.	4.76	0.431915
chrIII	WBGene00000420	ced-6	1	5594527	5598393	3197	21.6634	.	83.7367	3.86535	.	55.4033	2.55746
chrI	WBGene00000431	ceh-6	-1	8498108	8502313	3605	4.18086	.	24.9831	5.97559	.	8.19667	1.96052
chrII	WBGene00000432	ceh-7	-1	8703318	8704522	604	2.71026	.	5.03289	1.85698	.	5.84	2.15477
chrI	WBGene00000433	ceh-8	-1	8245716	8250941	4461	6.08025	.	128.057	21.0611	.	1.11333	0.183106
chrIII	WBGene00000439	ceh-16	1	8622618	8625920	2692	2.5821	.	23.54	9.11663	.	3.05333	1.1825
chrIII	WBGene00000443	ceh-20	1	6979151	6981733	1973	17.503	.	60.2633	3.44302	.	33.58	1.91852
chrV	WBGene00000449	ceh-27	-1	11661535	11665085	2771	8.80134	.	33.5667	3.81382	.	10.9633	1.24564
chrV	WBGene00000453	ceh-32	-1	11701743	11705503	3160	8.2481	.	38.1333	4.62329	.	9.27667	1.1247
chrV	WBGene00000455	ceh-34	-1	5315497	5319558	3411	7.26972	.	23.9033	3.28807	.	12.2033	1.67865
chrII	WBGene00000459	ceh-38	1	6951608	6955366	3158	45.2358	.	213.024	4.70919	.	15.0172	0.331977
chrI	WBGene00000466	cel-1	1	9665242	9668655	2804	11.1031	.	85.11	7.66545	.	20.5367	1.84964
chrII	WBGene00000472	cey-1	-1	11039391	11042935	2921	60.9086	.	543.597	8.92479	.	117.96	1.93667
chrI	WBGene00000473	cey-2	1	5619381	5620671	690	12.7833	.	18.5067	1.44772	.	6.35333	0.497001
chrIII	WBGene00000475	cey-4	-1	10866847	10869008	1447	5.49758	.	36.36	6.61382	.	2.21	0.401995
chrIII	WBGene00000479	cgh-1	-1	7495639	7498006	1767	34.7569	.	167.95	4.83213	.	32.5967	0.937846
chrIV	WBGene00000481	cha-1	-1	3613782	3626500	11347	10.9994	.	44.19	4.0175	.	7.2554	0.659618
chrX	WBGene00000482	chd-3	-1	12846360	12853509	6465	7.15592	.	23.49	3.2826	.	4.52667	0.632577
chrIII	WBGene00000508	cit-1.2	1	8009932	8013706	3174	44.4	.	90.5844	2.04019	.	40.59	0.91419
chrX	WBGene00000515	ckc-1	1	3576486	3578944	1854	2.07282	.	12.0833	5.82943	.	3.20946	1.54836
chrII	WBGene00000516	cki-1	1	7809312	7812052	2140	30.0678	.	126.113	4.1943	.	58.5133	1.94605
chrII	WBGene00000517	cki-2	1	7816514	7820227	2777	11.2521	.	35.8233	3.18371	.	5.73333	0.509536
chrII	WBGene00000528	clh-1	-1	11846445	11854805	7354	12.1586	.	36.21	2.97813	.	10.2433	0.842475
chrII	WBGene00000532	clh-5	-1	9094618	9099077	3594	12.1604	.	82.1933	6.75909	.	11.6	0.953916
chrV	WBGene00000534	cpi-2	1	6044113	6045654	941	27.6562	.	55.6667	2.01281	.	9.03333	0.326629
chrII	WBGene00000548	clr-1	1	5464822	5473788	8299	24.3905	.	105.55	4.3275	.	12.52	0.513314
chrIII	WBGene00000549	cls-2	1	9054075	9058804	4129	31.654	.	138.41	4.37259	.	82.3067	2.6002
chrV	WBGene00000552	cmd-1	1	1154269	1157761	2102	97.5423	.	493.063	5.05486	.	62.4567	0.640303
chrIV	WBGene00000553	cmk-1	1	1824443	1834028	6017	32.0091	.	117.22	3.66208	.	23.0548	0.720257
chrV	WBGene00000554	cnb-1	1	11375504	11378039	1933	26.6619	.	130.847	4.90762	.	14.8209	0.555884
chrIII	WBGene00000567	cnx-1	-1	9814296	9817240	2344	14.1128	.	143.897	10.1962	.	42.99	3.04616
chrII	WBGene00000616	col-39	1	10704843	10705961	287	4.39547	.	39.07	8.8887	.	26.61	6.05396	Y
chrIII	WBGene00000673	col-98	1	13018896	13020130	589	5.57555	.	54.9664	9.85848	.	20.0433	3.59486	Y
chrIV	WBGene00000677	col-103	-1	762412	763676	507	33.0542	.	678.463	20.5258	.	248.91	7.53035	Y
chrIII	WBGene00000768	cor-1	1	10248960	10254619	5043	5.8721	.	70.84	12.0638	.	3.58	0.609663
chrV	WBGene00000776	cpl-1	-1	16592550	16595413	2085	117.358	.	171.48	1.46118	.	230.157	1.96116
chrI	WBGene00000780	cpn-4	-1	10924231	10925904	1066	5.49953	.	14.8067	2.69235	.	11	2.00017
chrI	WBGene00000788	cpz-1	-1	2686642	2689444	1670	32.0832	.	187.257	5.83659	.	93.48	2.91367	Y
chrIII	WBGene00000793	crh-1	1	11657378	11693737	29492	36.7459	.	333.669	9.08043	.	10.0667	0.273953
chrV	WBGene00000802	crt-1	-1	6098976	6100706	1118	66.3837	.	167.627	2.52512	.	136.82	2.06105	Y
chrIII	WBGene00000833	cts-1	-1	10214723	10216734	1411	156.557	.	248.923	1.58998	.	164.99	1.05386
chrIII	WBGene00000836	cul-1	1	10471063	10475121	3447	10.4646	.	142.5	13.6173	.	6.37584	0.609276
chrV	WBGene00000838	cul-3	1	177122	184873	5512	8.69657	.	52.56	6.04376	.	8.04667	0.925269
chrV	WBGene00000879	cyn-3	1	15189782	15190910	391	30.5946	.	175.47	5.73532	.	17.8567	0.583654
chrIII	WBGene00000882	cyn-6	1	772914	774156	634	6.82808	.	13.1933	1.93222	.	7.08	1.0369
chrV	WBGene00000883	cyn-7	-1	15186565	15187755	453	85.6854	.	139.024	1.6225	.	54.4933	0.63597
chrX	WBGene00000884	cyn-8	1	8911290	8914199	2309	2.86314	.	17.79	6.21345	.	4.16333	1.45411
chrI	WBGene00000891	cyn-15	-1	13566086	13572116	4643	5.23627	.	27.8264	5.31416	.	13.9567	2.66538
chrII	WBGene00000894	dab-1	1	8226124	8229100	2376	53.1616	.	117.056	2.20189	.	51.45	0.967804
chrI	WBGene00000896	dad-1	-1	6553480	6554590	510	18.9471	.	58.8833	3.10778	.	26.5267	1.40004
chrIII	WBGene00000900	daf-4	1	5622831	5632277	8686	31.4227	.	347.883	11.0711	.	5.25667	0.167289
chrII	WBGene00000901	daf-5	-1	14033159	14042873	8444	56.3305	.	261.257	4.63792	.	35.3967	0.628374
chrIII	WBGene00000903	daf-7	1	811824	813758	1334	38.075	.	90.4267	2.37496	.	45.01	1.18214
chrIV	WBGene00000913	daf-18	-1	419987	425720	4878	8.24672	.	25.2	3.05576	.	10.6267	1.28859
chrII	WBGene00000914	daf-19	-1	10157478	10169465	11339	22.8996	.	58.3487	2.54802	.	27.5567	1.20337
chrV	WBGene00000936	dbl-1	1	6751996	6760392	7792	16.8731	.	52.6383	3.11966	.	32.0967	1.90224
chrI	WBGene00000938	dcp-66	-1	7537724	7548321	9870	34.3685	.	62.2917	1.81246	.	31.0306	0.902878
chrX	WBGene00000959	dgk-2	-1	4494888	4504363	8863	23.7189	.	121.957	5.14174	.	28.8533	1.21647
chrI	WBGene00000963	dhp-1	-1	7238996	7243861	4003	19.8836	.	81.7895	4.11342	.	20.9667	1.05447
chrII	WBGene00000972	dhs-8	1	14496931	14499611	2025	1.31556	.	0.504545	0.383523	.	1419.83	1079.26
chrIII	WBGene00000973	dhs-9	-1	5364473	5368335	1630	16.2647	.	38.3633	2.35868	.	13.2567	0.815056
chrV	WBGene00000977	dhs-14	-1	2763962	2765209	490	1.53673	.	13.5333	8.80655	.	0.973333	0.633378
chrX	WBGene00000988	dhs-25	1	1486531	1489324	2189	5.84125	.	7.70526	1.31911	.	23.2	3.97175	Y
chrX	WBGene00000991	dhs-28	1	6818301	6820034	1133	9.87335	.	19.1967	1.94429	.	10.9467	1.10871
chrIV	WBGene00000994	dic-1	1	8691726	8696443	4102	3.10288	.	8.79333	2.83393	.	2.92	0.941062
chrIII	WBGene00001005	dlc-1	-1	6462853	6464268	814	16.7647	.	77.08	4.59774	.	62.7067	3.74039	Y
chrX	WBGene00001006	dlg-1	1	5476188	5484904	8087	21.5598	.	95.3767	4.42381	.	8.28667	0.384356
chrIV	WBGene00001007	dli-1	-1	13096959	13098782	1223	14.6267	.	113.71	7.77412	.	5.10544	0.349049
chrI	WBGene00001008	dlk-1	-1	12565789	12575710	8994	40.3745	.	231.177	5.72581	.	54.8233	1.35787
chrIV	WBGene00001017	dnc-1	-1	10926253	10933225	6361	13.9223	.	32.4967	2.33415	.	25.6833	1.84477
chrIV	WBGene00001019	dnj-1	1	11298702	11304765	3688	13.3582	.	85.9367	6.43326	.	14.17	1.06077
chrII	WBGene00001023	dnj-5	-1	6853426	6858930	4904	26.7065	.	92.2267	3.45335	.	23.2333	0.869952
chrI	WBGene00001030	dnj-12	1	14756836	14758780	1344	34.9085	.	356.05	10.1995	.	51.7567	1.48264
chrII	WBGene00001031	dnj-13	1	11545497	11547302	1205	106.568	.	229.277	2.15146	.	101.39	0.951411
chrX	WBGene00001032	dnj-14	-1	4709838	4711959	1521	7.90796	.	43.01	5.43883	.	11.3733	1.43821
chrV	WBGene00001037	dnj-19	-1	5503017	5505177	1560	32.0135	.	76.563	2.39159	.	26.1067	0.81549
chrII	WBGene00001041	dnj-23	-1	9107319	9108572	653	4.47779	.	48.9267	10.9265	.	5.50333	1.22903
chrV	WBGene00001053	dop-2	1	9607453	9614918	6845	7.8645	.	25.33	3.2208	.	14.0767	1.7899
chrV	WBGene00001080	dpy-21	-1	17936734	17951281	12135	45.0777	.	299.72	6.64897	.	25.184	0.558681
chrX	WBGene00001082	dpy-23	1	4389185	4393770	3960	23.0534	.	126.057	5.46803	.	12.74	0.55263
chrV	WBGene00001089	dre-1	-1	6533598	6541805	7601	17.0202	.	48.29	2.83722	.	30.77	1.80785
chrIV	WBGene00001093	drp-1	1	5538035	5541356	2718	13.844	.	74.4407	5.37711	.	13.1967	0.953241
chrIII	WBGene00001094	dars-1	-1	9489078	9491217	1539	15.9649	.	77.5133	4.85523	.	6.50333	0.407352
chrX	WBGene00001130	dyn-1	1	15568588	15573625	4424	21.9151	.	60.2333	2.74848	.	8.84333	0.403527
chrV	WBGene00001137	eat-6	-1	13126392	13130589	3591	49.8548	.	134.513	2.6981	.	42.68	0.856086
chrX	WBGene00001149	bcat-1	1	12876919	12880255	2736	85.877	.	248.75	2.89658	.	116.817	1.36028
chrIII	WBGene00001160	efk-1	-1	6164867	6170159	4669	41.1817	.	169.17	4.10789	.	36.5033	0.886396
chrV	WBGene00001161	efl-1	-1	16958566	16965784	5026	4.60028	.	25.444	5.53097	.	3.88667	0.844876
chrIV	WBGene00001163	efn-2	1	10574650	10578266	3016	15.5502	.	52.4767	3.37465	.	17.2733	1.11081
chrI	WBGene00001167	eef-2	1	9163569	9166945	2776	18.8644	.	52.4967	2.78285	.	17.4867	0.926968
chrIII	WBGene00001168	eef-1A.1	-1	6969971	6971991	547	56.1892	.	134.54	2.39441	.	27.7267	0.493452
chrX	WBGene00001169	eef-1A.2	1	7823396	7825718	776	18.7365	.	57.4533	3.06639	.	45.2967	2.41757	Y
chrV	WBGene00001172	egl-3	-1	10169151	10174567	4816	45.8817	.	315.3	6.87201	.	50.1533	1.0931
chrV	WBGene00001178	egl-9	1	10467216	10476929	9112	45.9867	.	197.99	4.30537	.	32.8133	0.713539
chrX	WBGene00001184	egl-15	1	11014560	11023329	8158	9.95091	.	24.81	2.49324	.	18.6467	1.87387
chrIV	WBGene00001187	egl-19	1	7401027	7418722	17065	14.9096	.	74.5979	5.00334	.	9.53333	0.639409
chrIV	WBGene00001189	egl-21	-1	10478422	10481754	2732	49.8929	.	352.5	7.06513	.	308.897	6.19119	Y
chrII	WBGene00001193	egl-26	1	66663	71279	3791	15.3123	.	76.8376	5.01803	.	44.43	2.90159	Y
chrII	WBGene00001194	egl-27	1	6834002	6847865	13240	38.131	.	363.637	9.5365	.	27.33	0.716739
chrI	WBGene00001196	egl-30	1	1835745	1841193	4446	83.7632	.	194.786	2.32544	.	149.137	1.78046
chrII	WBGene00001208	egl-44	1	5931374	5940777	8798	25.6366	.	287.99	11.2335	.	49.27	1.92186
chrV	WBGene00001210	egl-46	-1	6679312	6681667	1755	1.84359	.	8.43	4.5726	.	6.70333	3.63602	Y
chrI	WBGene00001215	ego-2	-1	11400603	11416704	13023	12.0797	.	39.0826	3.23539	.	9.03333	0.747811
chrII	WBGene00001230	eif-3.G	1	8442406	8444188	1182	9.88452	.	30.6767	3.10351	.	3.84459	0.388951
chrIV	WBGene00001239	elo-1	1	9526237	9528335	1482	12.2976	.	84.6367	6.88239	.	11.1867	0.909665
chrIV	WBGene00001243	elo-5	-1	5374590	5377105	1789	17.3589	.	31.6567	1.82366	.	25.07	1.44422
chrIV	WBGene00001244	elo-6	-1	5386619	5388738	1508	22.9496	.	26.6533	1.16139	.	25.9533	1.13088
chrIII	WBGene00001259	emb-5	-1	4715256	4720922	5058	7.59618	.	27.6767	3.6435	.	7.68	1.01103
chrIII	WBGene00001262	emb-8	-1	5196639	5200499	3157	32.1527	.	72.4464	2.2532	.	45.7067	1.42155
chrX	WBGene00001325	eor-2	1	14602886	14608590	4890	17.7226	.	72.71	4.10267	.	24.1867	1.36474
chrX	WBGene00001329	epn-1	-1	14815915	14818724	2209	83.033	.	160.565	1.93375	.	74.5476	0.897807
chrII	WBGene00001340	etr-1	1	161044	170628	8337	32.286	.	139.02	4.30588	.	25.1167	0.777944
chrV	WBGene00001345	fos-1	1	6000673	6016070	14272	29.8916	.	187.19	6.26229	.	39.1267	1.30895
chrII	WBGene00001368	exc-7	1	9576076	9581045	4365	32.1875	.	77.7433	2.41533	.	42.72	1.32722
chrIV	WBGene00001390	far-6	1	13328047	13329295	645	14.1217	.	87.3133	6.18292	.	43.8733	3.1068	Y
chrI	WBGene00001404	fbp-1	-1	2580937	2586242	2975	17.7682	.	48.0724	2.70552	.	55.7133	3.13556
chrIV	WBGene00001411	fem-1	-1	5533131	5537920	4003	15.5216	.	43.0067	2.77076	.	2.93333	0.188984
chrIV	WBGene00001426	fkb-1	1	11036439	11038145	1105	38.8452	.	57.0989	1.46991	.	7.93919	0.20438
chrV	WBGene00001431	fkb-6	1	20845696	20847706	1390	30.2594	.	157.873	5.21734	.	56.3467	1.86212
chrIV	WBGene00001439	fkh-7	1	5582624	5610353	26986	67.2263	.	472.949	7.03518	.	14.86	0.221044
chrII	WBGene00001440	fkh-8	-1	6189551	6191459	1237	6.26556	.	44.0788	7.03509	.	11.88	1.89608
chrIV	WBGene00001444	flp-1	1	9144690	9146105	815	11.7117	.	42.5767	3.63541	.	7.42333	0.633841
chrX	WBGene00001448	flp-5	1	8528255	8531023	2168	5.2214	.	11.94	2.28674	.	11.1333	2.13225	Y
chrX	WBGene00001450	flp-7	1	5885523	5886798	675	7.36815	.	28.5067	3.86891	.	6.60667	0.896652
chrIV	WBGene00001452	flp-9	-1	12754535	12757567	2428	14.1083	.	59.4262	4.21214	.	36.7867	2.60744	Y
chrIV	WBGene00001453	flp-10	1	7862749	7870063	6678	18.6985	.	61.01	3.26283	.	26.5567	1.42026
chrIII	WBGene00001458	flp-15	-1	13663301	13667737	3535	6.84781	.	18.9867	2.77266	.	7.47667	1.09183
chrII	WBGene00001459	flp-16	1	13235021	13237282	1438	15.0073	.	52.3261	3.48671	.	10.73	0.714985
chrIV	WBGene00001460	flp-17	-1	17190168	17191971	1196	19.6743	.	70.26	3.57115	.	8.88667	0.451688
chrIII	WBGene00001470	flt-1	-1	7650487	7656510	5423	13.7446	.	108.55	7.89764	.	19.7967	1.44032
chrIV	WBGene00001476	fmo-1	1	10661986	10664384	1780	10.5101	.	33.75	3.21119	.	26.6133	2.53216	Y
chrV	WBGene00001479	fmo-4	-1	13603283	13608542	4655	13.7649	.	37.7567	2.74297	.	17.9433	1.30356
chrV	WBGene00001480	fmo-5	-1	899313	903576	2970	4.91785	.	12.69	2.5804	.	16.9433	3.44528	Y
chrX	WBGene00001484	fox-1	-1	2445794	2456096	9340	16.9362	.	81.2267	4.79603	.	56.9433	3.36222	Y
chrI	WBGene00001491	frm-4	-1	5402898	5409709	6152	25.4342	.	301.473	11.8531	.	24.5533	0.965368
chrIV	WBGene00001492	frm-5	-1	39226	51329	3261	4.42058	.	0	0	.	9.42	2.13094
chrV	WBGene00001493	frm-7	1	12295589	12306953	10764	108.114	.	197.25	1.82446	.	24.9	0.230312
chrV	WBGene00001496	frm-10	1	13463155	13467212	3182	50.7527	.	182.903	3.60382	.	41.1367	0.810532
chrI	WBGene00001501	ftn-2	-1	3680181	3681967	982	43.6426	.	98.0867	2.2475	.	64.7767	1.48425
chrX	WBGene00001502	ftt-2	-1	11603640	11605591	1326	276.55	.	1108.91	4.0098	.	627.61	2.26943	Y
chrII	WBGene00001509	fzo-1	-1	5833307	5836404	2497	7.09832	.	39.67	5.58865	.	3.29667	0.464429
chrII	WBGene00001510	fzr-1	-1	9640936	9647239	5668	33.4823	.	146.323	4.37017	.	27.19	0.812072
chrIII	WBGene00001512	gab-1	-1	12771777	12779735	5855	4.65371	.	9.78667	2.10298	.	8.47667	1.82148
chrV	WBGene00001513	gad-1	-1	6431308	6433663	1755	4.59544	.	28.66	6.23662	.	3.54	0.770329
chrX	WBGene00001515	gap-1	1	2189832	2195341	4757	11.7934	.	22.4433	1.90305	.	8.47333	0.718484
chrIII	WBGene00001518	gar-2	1	6308065	6320819	12132	9.05106	.	29.8167	3.29427	.	14.0367	1.55083
chrIII	WBGene00001561	gei-4	-1	344298	354797	8738	57.4673	.	351.56	6.11755	.	72.3367	1.25874
chrIV	WBGene00001562	lin-66	1	13887876	13892988	4407	76.7841	.	269.557	3.51059	.	127.833	1.66484
chrV	WBGene00001564	gei-7	-1	724208	728007	3142	112.647	.	126.816	1.12578	.	43.7067	0.387998
chrIV	WBGene00001577	gem-4	1	11744675	11748662	3377	3.84528	.	29.02	7.54692	.	5.74667	1.49447
chrIV	WBGene00001580	gex-3	1	12404357	12408665	3708	14.46	.	40.6567	2.81167	.	7.07667	0.489398
chrII	WBGene00001586	ggr-1	1	10695021	10702465	6796	8.36823	.	59.7867	7.14448	.	5.40333	0.645696
chrV	WBGene00001591	glc-1	1	16219603	16221896	1576	6.73128	.	38.2233	5.67846	.	7.83	1.16323
chrI	WBGene00001601	glh-4	1	3724851	3731227	1334	4.57571	.	3.64474	0.79654	.	17.8567	3.90249
chrX	WBGene00001602	gln-1	1	6058016	6060199	1583	19.5913	.	94.8267	4.84025	.	24.3967	1.24528
chrIV	WBGene00001604	gln-3	-1	16167751	16170779	1974	102.758	.	110.605	1.07637	.	158.303	1.54055
chrII	WBGene00001615	glr-4	-1	7785022	7797917	12093	7.70872	.	29.4485	3.82015	.	1.09667	0.142263
chrX	WBGene00001617	glr-6	-1	6836346	6840975	3854	3.68941	.	20.58	5.57812	.	3.43	0.929687
chrII	WBGene00001623	glt-5	-1	9706437	9710438	3401	3.48192	.	14.9433	4.2917	.	6.59333	1.89359
chrI	WBGene00001648	goa-1	1	7518817	7526198	6712	36.8559	.	132.317	3.59011	.	77.29	2.09709	Y
chrIV	WBGene00001669	gpa-7	1	10403565	10408245	4060	16.6097	.	117.37	7.06634	.	28.0993	1.69174
chrII	WBGene00001679	gpb-1	-1	11743329	11749407	5427	81.4319	.	283.044	3.47584	.	160.51	1.97109
chrI	WBGene00001680	gpb-2	-1	7318297	7321567	2608	13.1867	.	81.34	6.16832	.	9.08333	0.688824
chrI	WBGene00001707	grh-1	-1	1259491	1271166	8735	18.7844	.	35.7	1.90051	.	46.8267	2.49284	Y
chrX	WBGene00001708	grk-1	-1	9991799	9999532	6986	17.0851	.	83.5033	4.88749	.	11.76	0.688319
chrIV	WBGene00001713	grl-4	-1	7309824	7311220	793	11.2806	.	14.7167	1.3046	.	21.55	1.91036
chrI	WBGene00001745	gsa-1	1	1068612	1075013	4814	48.9316	.	222.512	4.54741	.	36.34	0.74267
chrV	WBGene00001747	gsp-1	1	10677641	10686485	7953	35.4645	.	183.99	5.188	.	19.2	0.541386
chrIII	WBGene00001748	gsp-2	1	7335481	7338697	2597	107.318	.	268.253	2.49961	.	102.983	0.95961
chrII	WBGene00001753	gst-5	1	10950294	10951546	648	10.7739	.	46.43	4.30948	.	60.4033	5.60644	Y
chrII	WBGene00001755	gst-7	1	4882067	4883356	575	23.1652	.	57.48	2.48131	.	35.0367	1.51247
chrII	WBGene00001764	gst-16	-1	13622895	13624381	597	1.72111	.	6.60843	3.83964	.	5.37667	3.12396	Y
chrII	WBGene00001768	gst-20	-1	13608115	13609709	702	45.9067	.	105.697	2.30244	.	77.9033	1.69699
chrII	WBGene00001776	gst-28	-1	15166119	15167322	489	3.42229	.	2432.73	710.849	.	11.4144	3.33531	Y
chrII	WBGene00001778	gst-30	-1	4933877	4935031	537	0.0344507	.	0.996094	28.9136	.	0.85	24.673
chrX	WBGene00001784	gst-36	-1	9861592	9863296	1104	27.4321	.	86.2833	3.14535	.	18.26	0.665644
chrIV	WBGene00001794	gta-1	1	10180545	10183937	2790	32.7066	.	83.1633	2.54271	.	30.9767	0.947107
chrX	WBGene00001821	ham-2	1	4552327	4558829	5810	28.3182	.	147.06	5.19313	.	38.67	1.36555
chrV	WBGene00001834	hda-1	1	14524448	14527398	2201	9.03794	.	41.9133	4.63749	.	18.8567	2.08639
chrX	WBGene00001837	hda-4	1	16727115	16743726	15979	30.4752	.	197.869	6.49279	.	14.7	0.482359
chrII	WBGene00001840	hel-1	-1	8326799	8329013	1614	32.4318	.	136.99	4.22393	.	33.9467	1.04671
chrI	WBGene00001843	hgo-1	-1	9049452	9055391	4998	19.5118	.	73.7033	3.77737	.	12.53	0.642175
chrX	WBGene00001844	hid-1	1	2488954	2494330	4598	4.83058	.	19.5933	4.0561	.	24.4291	5.05717
chrV	WBGene00001851	hif-1	1	20778654	20785227	5772	81.4386	.	338.13	4.15196	.	63.81	0.783535
chrV	WBGene00001852	hil-1	1	14948890	14952775	2267	76.0505	.	634.677	8.34546	.	170.152	2.23736	Y
chrV	WBGene00001855	hil-4	1	4754298	4755459	414	4.8756	.	17.5933	3.60844	.	11.8817	2.43697	Y
chrV	WBGene00001864	him-5	1	14090806	14092417	994	3.29024	.	18.5866	5.64901	.	1.47333	0.447789
chrX	WBGene00001945	his-71	-1	7981333	7982618	576	37.8837	.	87.6948	2.31484	.	26.4633	0.698542
chrIII	WBGene00001946	his-72	-1	12367374	12368970	815	54.1098	.	249.737	4.61537	.	409.31	7.56443	Y
chrIII	WBGene00001955	hlh-11	1	9619604	9626453	6178	56.8344	.	362.243	6.37366	.	87.7967	1.54478
chrIII	WBGene00001972	hmg-1.2	1	6280366	6283068	2102	40.6016	.	35.2115	0.867246	.	57.11	1.4066
chrV	WBGene00001978	hmp-1	1	11845085	11852146	6338	14.4936	.	86.5133	5.96907	.	12.8433	0.886138
chrIII	WBGene00001989	hot-4	1	6219722	6224392	4070	12.6579	.	52.1167	4.11734	.	9.16	0.723661
chrIII	WBGene00001993	hpd-1	1	10534339	10537585	2481	65.9331	.	252.614	3.83137	.	64.1267	0.972602
chrX	WBGene00001994	hpk-1	-1	4211686	4217395	5086	39.3608	.	165.187	4.19673	.	41.06	1.04317
chrIV	WBGene00001999	hrp-1	-1	3336921	3338857	1276	54.9318	.	304.503	5.5433	.	115.647	2.10528	Y
chrIV	WBGene00002001	hars-1	1	10858857	10861275	1818	12.8589	.	76.73	5.96707	.	10.2733	0.798927
chrI	WBGene00002004	hsf-1	-1	11953502	11965048	10038	16.0644	.	76.017	4.73202	.	2.94	0.183013
chrIV	WBGene00002005	hsp-1	1	17278625	17281298	1383	243.148	.	265.677	1.09265	.	173.16	0.712158
chrX	WBGene00002007	hsp-3	-1	6088993	6092038	2309	21.5502	.	179.667	8.33711	.	62.9433	2.92077
chrII	WBGene00002008	hsp-4	-1	7350076	7352615	1872	7.46448	.	15.9033	2.13054	.	15.3467	2.05596
chrV	WBGene00002010	hsp-6	-1	4824124	4827090	2324	52.0706	.	204.267	3.92288	.	39.4667	0.757946
chrIII	WBGene00002011	hsp-12.2	1	8137843	8139565	1121	20.9973	.	73.8033	3.51489	.	24.2467	1.15475
chrV	WBGene00002021	hsp-17	-1	8384754	8385971	617	27.4716	.	53.78	1.95766	.	14.5033	0.527938
chrX	WBGene00002023	hsp-25	-1	6034057	6042137	7440	11.7812	.	102.892	8.73357	.	16.62	1.41072
chrX	WBGene00002024	hsp-43	-1	6233113	6235700	1987	122.995	.	79.9533	0.650051	.	48.8	0.396763
chrI	WBGene00002026	hsp-70	-1	9320353	9322525	1503	10.7269	.	10.4817	0.977144	.	6.97333	0.65008
chrI	WBGene00002035	hum-1	-1	8845800	8852612	6085	6.71652	.	32.0867	4.77728	.	7.22	1.07496
chrIII	WBGene00002048	ida-1	1	5755491	5765769	9553	45.9559	.	150.6	3.27706	.	176.277	3.83578	Y
chrII	WBGene00002054	ifb-2	1	5749935	5754121	3198	7.49703	.	34.3467	4.58137	.	8.44	1.12578
chrV	WBGene00002061	ife-3	-1	6589	8712	1523	13.392	.	88.8867	6.6373	.	39.33	2.93683
chrI	WBGene00002069	ikb-1	1	9685414	9688639	2569	46.3501	.	87.7433	1.89305	.	34.65	0.747571
chrX	WBGene00002071	ile-2	1	768355	770771	1815	2.7022	.	22.6667	8.38821	.	3.78667	1.40133
chrV	WBGene00002072	ima-1	1	11239399	11241762	1763	19.9742	.	52.1933	2.61304	.	5.38667	0.269681
chrIV	WBGene00002074	ima-3	-1	7559408	7561898	1890	35.922	.	119.85	3.3364	.	14.7933	0.411819
chrII	WBGene00002076	imb-2	1	14365405	14373374	3666	18.5951	.	46.6333	2.50783	.	30.6533	1.64847
chrV	WBGene00002078	xpo-1	1	7804649	7814553	9235	70.0477	.	269.338	3.84506	.	48.25	0.688816
chrIII	WBGene00002083	inf-1	1	6930011	6931898	1042	6.65355	.	34.0433	5.11657	.	9.44667	1.41979
chrI	WBGene00002101	ins-18	1	8147483	8149707	1624	10.8294	.	38.8267	3.58529	.	5.84667	0.539887
chrX	WBGene00002123	inx-1	-1	6943699	6962551	18160	15.7477	.	70.6267	4.48489	.	2.93333	0.186271
chrX	WBGene00002127	inx-5	-1	8299775	8305019	4639	7.2923	.	23.1033	3.16818	.	16.3933	2.24803	Y
chrIV	WBGene00002129	inx-7	-1	5943969	5946655	2026	7.95607	.	32.5233	4.08786	.	20.6733	2.59843
chrI	WBGene00002134	inx-12	-1	3755473	3759075	2919	9.71686	.	52.0267	5.35427	.	20.2733	2.08641	Y
chrI	WBGene00002136	inx-14	-1	7349974	7352199	1625	3.04246	.	2.51812	0.827657	.	2.44333	0.803078
chrIV	WBGene00002140	inx-18	1	606360	614026	6957	6.33362	.	38.3212	6.05044	.	5.12333	0.808911
chrX	WBGene00002146	ipp-5	1	6031003	6034475	2872	12.8595	.	82.6767	6.42923	.	22.1933	1.72583
chrV	WBGene00002148	gon-14	-1	6606418	6611620	4548	8.37511	.	87.5038	10.4481	.	7.11	0.848944
chrIV	WBGene00002162	isp-1	-1	8133775	8136252	1877	13.7227	.	69.6967	5.07893	.	13.7033	0.998589
chrIII	WBGene00002169	isw-1	-1	6703940	6710083	5543	6.65118	.	23.7923	3.57715	.	4.76667	0.716665
chrIV	WBGene00002178	jnk-1	1	6956936	6963705	6146	13.2777	.	103.027	7.75935	.	9.77	0.735818
chrI	WBGene00002179	jph-1	-1	7946830	7954778	7090	31.5427	.	201.373	6.38414	.	22.0733	0.699791
chrIV	WBGene00002180	jtr-1	1	1420382	1421769	787	23.8361	.	53.7692	2.25579	.	3.67333	0.154108
chrII	WBGene00002183	kat-1	1	7073673	7075509	871	5.49082	.	30.2633	5.51163	.	9.58	1.74473
chrIV	WBGene00002187	kgb-1	-1	405623	410459	3666	14.1157	.	60.3158	4.27297	.	7.45578	0.528192
chrX	WBGene00002190	kin-2	-1	5971660	5984687	12361	27.2752	.	113.337	4.1553	.	30.3433	1.11249
chrI	WBGene00002196	kin-10	-1	8288952	8291131	1573	23.1205	.	166.803	7.21453	.	46.96	2.0311
chrI	WBGene00002198	kin-14	-1	7075922	7079752	3223	108.195	.	12.5133	0.115655	.	1779.89	16.4507
chrIII	WBGene00002201	kin-18	1	6116637	6124015	6754	13.449	.	37.17	2.76378	.	7.91	0.588148
chrIII	WBGene00002202	kin-19	-1	4084010	4087711	3097	46.7972	.	254.658	5.44173	.	29.21	0.624182
chrX	WBGene00002210	kin-29	-1	2843996	2852445	7481	24.3812	.	139.85	5.73597	.	65.7833	2.69811
chrIV	WBGene00002214	klc-1	1	11083183	11086032	2249	18.3977	.	9.30667	0.505859	.	86.2367	4.68735
chrV	WBGene00002215	klc-2	-1	5575394	5582418	6311	21.3998	.	13.3333	0.623059	.	71.8967	3.35969
chrII	WBGene00002216	klp-3	1	7839805	7845592	5179	10.307	.	25.35	2.45949	.	54.0267	5.24174	Y
chrX	WBGene00002234	kqt-2	-1	8243084	8246220	2536	1.47713	.	15.92	10.7777	.	4.25667	2.88172	Y
chrII	WBGene00002251	lat-1	1	8890202	8908592	17644	12.4308	.	66.3321	5.33612	.	16.2567	1.30778
chrII	WBGene00002262	ldh-1	1	11724627	11726469	1173	14.1803	.	26.6433	1.8789	.	16.6067	1.17111
chrII	WBGene00002264	lec-1	1	13195376	13199533	3007	71.9593	.	378.117	5.25459	.	28.0667	0.390036
chrII	WBGene00002265	lec-2	-1	10009547	10015921	5654	163.853	.	582.427	3.55457	.	137.1	0.836725
chrII	WBGene00002266	lec-3	1	9987400	10000287	12184	30.5465	.	143.19	4.68761	.	9.94	0.325406
chrIII	WBGene00002269	lec-6	-1	599506	600633	434	31.318	.	72.7567	2.32316	.	16.4033	0.523767
chrI	WBGene00002276	lem-3	-1	9578516	9581264	2147	3.71588	.	23.4767	6.31792	.	11.74	3.15941
chrI	WBGene00002324	let-49	1	14820345	14821754	809	10.0519	.	59.6319	5.9324	.	3.31667	0.329954
chrIV	WBGene00002335	let-60	-1	11688204	11692312	3447	27.8103	.	68.9146	2.47803	.	29.6667	1.06675
chrIV	WBGene00002344	let-70	-1	11081063	11082854	940	165.839	.	323.93	1.95328	.	181.983	1.09735
chrIV	WBGene00002363	let-92	1	11857505	11860439	2334	57.3738	.	436.997	7.61666	.	66.3833	1.15703
chrV	WBGene00002632	let-413	-1	7972904	7978830	5318	17.8449	.	67.85	3.80221	.	7.96	0.446067
chrIII	WBGene00002881	let-756	1	6402677	6409965	6686	11.4755	.	74.9367	6.53012	.	10.3	0.897561
chrIV	WBGene00002974	lev-1	-1	13174147	13179365	4602	8.50087	.	25.6333	3.01538	.	8.29667	0.975979
chrI	WBGene00002978	lev-11	-1	14620748	14631012	9059	53.6522	.	286.952	5.34837	.	13.11	0.244351
chrII	WBGene00002980	lgg-1	-1	6346925	6348483	958	835.575	.	658.537	0.788124	.	660.37	0.790318
chrIV	WBGene00002981	lgg-2	-1	10934170	10936051	1281	459.343	.	934.483	2.03439	.	253.157	0.551128
chrII	WBGene00002994	lin-5	1	7860551	7863511	2360	5.31907	.	30.0066	5.64132	.	8.67667	1.63124
chrII	WBGene00002997	lin-8	1	3055807	3060251	3466	8.25505	.	26.6241	3.22518	.	10.6	1.28406
chrX	WBGene00003003	lin-14	1	11465930	11484202	17635	52.625	.	129.27	2.45644	.	15.9433	0.302961
chrII	WBGene00003009	lin-23	1	6370365	6374502	3523	52.3682	.	234.903	4.48561	.	40.8233	0.779545
chrIII	WBGene00003021	lin-36	-1	8016597	8021005	3794	17.2574	.	69.9367	4.05257	.	20.7067	1.19987
chrV	WBGene00003025	lin-40	1	3704140	3712845	6664	17.0742	.	95.6184	5.60017	.	14.6767	0.859581
chrI	WBGene00003026	lin-41	-1	9335764	9343742	7273	17.1588	.	85.0367	4.95586	.	18.0638	1.05274
chrIV	WBGene00003030	lin-45	-1	6742527	6756339	13123	34.1247	.	138.427	4.0565	.	24.92	0.730264
chrIV	WBGene00003034	lin-49	1	8620389	8626131	5123	19.2944	.	129.633	6.71872	.	16.5033	0.855345
chrI	WBGene00003040	lin-59	-1	3713520	3721444	7285	58.5719	.	263.313	4.49556	.	46.76	0.798336
chrIV	WBGene00003043	lip-1	1	6841746	6844955	2591	34.8553	.	155.34	4.45672	.	22.8967	0.656907
chrIII	WBGene00003047	lis-1	-1	13371070	13377244	5430	20.2056	.	77.4149	3.83136	.	15.9867	0.791199
chrIII	WBGene00003048	lit-1	1	13697973	13723972	23637	39.2105	.	517.559	13.1995	.	6.61	0.168577
chrI	WBGene00003052	lmn-1	1	8761677	8765627	3350	35.639	.	181.057	5.0803	.	13.8867	0.389649
chrX	WBGene00003053	lmp-1	-1	6376422	6378517	1495	25.3528	.	136.293	5.37586	.	53.44	2.10785	Y
chrIII	WBGene00003063	lpd-7	1	7573067	7575202	1535	11.7248	.	39.61	3.37832	.	4.51333	0.384941
chrI	WBGene00003072	lrp-2	-1	3935272	3956852	20846	16.996	.	78.0669	4.59325	.	7.33	0.431277
chrX	WBGene00003084	lst-2	-1	4378005	4386586	7898	20.4992	.	113.03	5.5139	.	30	1.46347
chrIV	WBGene00003085	lst-3	1	14071143	14076719	4962	59.0978	.	92.3851	1.56326	.	93.0333	1.57423
chrIV	WBGene00003086	lst-4	-1	14060980	14071022	7736	18.3987	.	34.7796	1.89033	.	12.33	0.670158
chrX	WBGene00003087	lsy-2	1	2089665	2093240	2777	10.5402	.	35.3867	3.35732	.	6.82667	0.647682
chrV	WBGene00003090	lys-1	1	10277802	10279102	672	7.42336	.	9.33209	1.25712	.	11.1367	1.50022
chrIII	WBGene00003102	mab-5	-1	7776842	7784389	6759	6.06199	.	51.9	8.56154	.	15.0467	2.48213
chrI	WBGene00003111	mab-20	-1	1644590	1651379	5010	8.86208	.	25.5843	2.88695	.	11.4467	1.29165
chrI	WBGene00003132	mat-1	-1	5123929	5127615	3086	31.8845	.	107.82	3.38158	.	48.7833	1.53
chrIV	WBGene00003148	mbf-1	-1	11479336	11480541	605	37.6603	.	79.0933	2.10018	.	17.9833	0.477514
chrX	WBGene00003149	mbk-1	-1	14819844	14824698	4238	22.6609	.	67.7833	2.9912	.	18.4116	0.812481
chrIV	WBGene00003153	mca-3	-1	3103531	3135005	24157	42.8296	.	61.9864	1.44728	.	20.7267	0.483933
chrIII	WBGene00003157	mcm-5	-1	4288233	4291411	2570	4.33911	.	5.97667	1.3774	.	6.49667	1.49724
chrIII	WBGene00003158	mcm-6	1	9794168	9798558	3787	2.31423	.	12.5734	5.43309	.	2.81	1.21423
chrX	WBGene00003163	mdl-1	1	6742360	6743863	903	880.404	.	1818.51	2.06554	.	724.633	0.823069
chrX	WBGene00003166	mec-2	1	5575880	5590780	14269	9.91086	.	14.3167	1.44454	.	27.1633	2.74077
chrX	WBGene00003171	mec-7	-1	7774805	7776607	1005	5.68905	.	8.60333	1.51226	.	29.2733	5.14555
chrIII	WBGene00003175	mec-12	-1	3131566	3139195	6545	7.27418	.	43.5058	5.98086	.	6.85667	0.942604
chrI	WBGene00003182	mef-2	1	9095856	9100179	3723	64.4762	.	612.95	9.5066	.	60.6367	0.94045
chrX	WBGene00003185	mek-1	1	7478610	7480955	1745	8.02751	.	34.0667	4.24374	.	12.8633	1.60241
chrII	WBGene00003196	mel-11	1	9356990	9369040	11096	11.9767	.	70.72	5.90482	.	7.33667	0.61258
chrI	WBGene00003209	mel-26	1	9127900	9135742	6948	21.0392	.	171.65	8.15857	.	9.55667	0.454231
chrIV	WBGene00003218	mep-1	1	11523936	11527929	3392	36.3129	.	171.997	4.73651	.	71.01	1.9555
chrIII	WBGene00003234	mif-1	1	11847758	11849934	1463	20.8643	.	27.7108	1.32814	.	3.79	0.18165
chrV	WBGene00003235	mif-2	-1	11976755	11978358	926	18.0238	.	65.0106	3.60694	.	43.1033	2.39147
chrI	WBGene00003238	mig-1	-1	948569	957375	6232	10.4258	.	128.543	12.3293	.	10.8667	1.04229
chrV	WBGene00003242	mig-6	1	7826726	7842365	15013	7.5422	.	14.96	1.98351	.	7.57333	1.00413
chrIII	WBGene00003371	mlc-3	1	5564990	5567344	1754	46.2962	.	230.993	4.98947	.	116.167	2.50921
chrIII	WBGene00003372	mlc-4	-1	3392002	3395243	2301	13.2384	.	30.7602	2.32356	.	13.3233	1.00642
chrV	WBGene00003374	mlk-1	-1	5056364	5065159	8076	15.961	.	62.3067	3.90368	.	22.6067	1.41637
chrIII	WBGene00003378	mml-1	-1	7370066	7374966	4244	105.44	.	183.533	1.74064	.	186.393	1.76776
chrII	WBGene00003388	moe-3	-1	13160345	13165993	3913	29.1927	.	132.363	4.53413	.	22.35	0.765603
chrI	WBGene00003396	mom-4	-1	9895683	9900642	4344	6.40458	.	93.966	14.6717	.	9.91	1.54733
chrI	WBGene00003397	mom-5	1	9963868	9969403	4763	11.5478	.	34.98	3.02916	.	7.20333	0.623786
chrII	WBGene00003403	mps-1	-1	6292621	6294321	1100	3.47	.	26.62	7.67147	.	9.04478	2.60656	Y
chrX	WBGene00003411	mrp-5	-1	14938182	14946751	7619	11.4318	.	47.5066	4.15565	.	12.5833	1.10073
chrIII	WBGene00003423	msi-1	-1	3965147	3978451	12608	44.4314	.	169.27	3.80969	.	37.2233	0.83777
chrIII	WBGene00003476	mtm-3	-1	3789964	3801418	10211	97.8005	.	364.317	3.7251	.	113.447	1.15998
chrX	WBGene00003495	mup-2	-1	6408427	6410311	1254	11.7484	.	105.303	8.9632	.	46.4	3.94947	Y
chrX	WBGene00003511	mxl-3	-1	13349571	13350893	722	83.2278	.	103.387	1.24221	.	67.82	0.814872
chrX	WBGene00003514	myo-2	1	12467998	12475273	6111	10.0259	.	60.2483	6.00925	.	8.17	0.814886
chrV	WBGene00003515	myo-3	-1	12226797	12234733	6835	27.8599	.	101.76	3.65256	.	8.90068	0.31948
chrIII	WBGene00003519	nac-3	1	10151950	10157829	5234	50.5033	.	102.8	2.03551	.	69.3033	1.37225
chrIV	WBGene00003527	nas-8	1	7114908	7119902	4299	1.74948	.	6.24333	3.56869	.	1.47	0.840251
chrV	WBGene00003549	nas-31	-1	10918842	10921813	2369	2.57936	.	4.91667	1.90616	.	3.04333	1.17988
chrX	WBGene00003561	ncr-1	-1	4472259	4480090	7202	34.238	.	53.6074	1.56573	.	41.9467	1.22515
chrI	WBGene00003564	ncs-2	-1	10033532	10040149	5981	64.7286	.	332.03	5.12957	.	143.9	2.22313	Y
chrI	WBGene00003569	ncx-4	1	9805515	9813066	6071	15.3827	.	100.5	6.5333	.	7.32	0.475859
chrIII	WBGene00003589	nex-2	-1	10325542	10331055	4395	48.7783	.	243.137	4.98453	.	41.11	0.842793
chrV	WBGene00003591	nex-4	1	4855228	4857246	1418	20.7042	.	118.043	5.70143	.	24.35	1.17609
chrII	WBGene00003592	nfi-1	1	7537572	7542957	4743	7.96911	.	27.5	3.45082	.	8.79866	1.1041
[truncated: 1,749 more rows]

## Sheet: Wild.Type.L3
Chromosome	WBGeneID	Gene Name	Strand	True TSS Begin	True TSS End	Uniquely mappable bases within gene body (excluding 300 bp on either end)	Wild-Type L3: Gene Body Expression	.	Wild-Type L3: 3' Maximum 200bp GRO-seq Signal Average	Wild-Type L3: 3'-Pausing Ratio	.	Wild-Type L3: 5' Maximum GRO-seq Signal Average	Wild-Type L3: 5'-Pausing Ratio	Wild-Type L3: Paused?
[truncated: 3,953 more rows]
