# Supplementary material for: Condensin controls recruitment of RNA polymerase II to achieve nematode X-chromosome dosage compensation
Source: eLife. 2013 Jun 18;2:e00808. doi: 10.7554/eLife.00808 (PMC3687364; doi:10.7554/eLife.00808)
Supplement: Figure 5—source data 1. — Genes were separated into different gene sets based on their length, origin, and chromosome (X vs autosome) to compare GRO-seq gene expression between the sdc-2 mutant and control RNAi embryos. Shown are the total number of genes, the median sdc-2 mutant/control RNAi expression ratio, the average sdc-2 mutant/control RNAi expression ratio together with the standard error of the mean, and the number of genes in each set that are more highly expressed in each condition. Across numerous protein-coding gene sets, the X chromosome is more highly expressed and the autosomes are slightly less expressed in the sdc-2 mutant. Furthermore, when X-linked genes are significantly changed in expression, they are almost exclusively increased in expression. Each gene set is separated into two sets, one containing all genes and the other containing genes that are significantly changed in expression as determined by analysis with DESeq (p<0.05) (Anders and Huber, 2010). For the first two lists (labeled with ‘≥250 bp’), average GRO-seq gene expression was calculated from the beginning to the end of either the WormBase (WB) model or the newly annotated transcription start site (TSS) gene model. WB genes had to be expressed at greater than 1 RPKM (reads per kilobase per million), and have at least 250 uniquely mappable bases in both sets. For the next set (labeled with ‘WormBase WS230 Genes ≥1.1 kb’), average GRO-seq expression was calculated for genes greater than 1.1 kb, with the first and last 300 bp of the gene excluded. The level of expression had to be ≥1 RPKM for WB genes, and have at least 250 uniquely mappable bases for a gene to be included. For the final two sets of genes (labeled with ‘≥1.1 kb’ and ‘≥1.5 kb’), expression was calculated for genes of the indicated length that have a newly annotated TSS, with the first and last 300 bp of the gene excluded. A gene had to have at least 250 uniquely mappable bases for it to be included. RNA polymerase II transcribed microRNAs are c [file elife00808s005.xls]

## Sheet: Sheet1
Figure 5—source data 1
	Protein-Coding Genes
		WormBase WS230 Genes ≥ 250 bp (RPKM ≥ 1 in both conditions)		Genes ≥ 250 bp with TSS Calls		WormBase WS230 Genes ≥ 1.1 kb (RPKM ≥ 1 in both conditions)		Genes ≥ 1.1 kb with TSS Calls		Genes ≥ 1.5 kb with TSS Calls
	Chromosome	X	A	X	A	X	A	X	A	X	A
	Total genes	1675	9323	765	3753	1456	7694	706	3311	665	2943
	median (sdc-2 / ctrl) ratio	1.67	0.81	1.67	0.8	1.63315	0.801193	1.6367	0.785253	1.63588	0.790084
	mean (sdc-2 / ctrl) ratio ± SEM	1.80 ± 0.02	0.89 ± 0.01	1.97 ± 0.13	0.94 ± 0.04	1.77 ± 0.02	0.88 ± 0.01	1.90 ± 0.14	0.89 ± 0.03	1.90 ± 0.15	0.88 ± 0.03
	sdc-2 > ctrl (≥ 1.5 fold)	1087 (64.9%)	483 (5.2%)	512 (66.9%)	141 (3.8%)	915 (62.8%)	388 (5.0%)	450 (63.7%)	114 (3.4%)	422 (63.5%)	94 (3.2%)
	ctrl > sdc-2 (≥ 1.5 fold)	16 (1.0%)	2490 (26.7%)	2 (0.3%)	930 (24.8%)	15 (1.0%)	2140 (27.8%)	0 (0.0%)	911 (27.5%)	0 (0.0%)	770 (26.2%)
	Genes with statistically significant (p ≤ 0.05) changes in expression
		WormBase WS230 Genes ≥ 250 bp (RPKM ≥ 1 in both conditions)		Genes ≥ 250 bp with TSS Calls		WormBase WS230 Genes ≥ 1.1 kb (RPKM ≥ 1 in both conditions)		Genes ≥ 1.1 kb with TSS Calls		Genes ≥ 1.5 kb with TSS Calls
	Chromosome	X	A	X	A	X	A	X	A	X	A
	Total genes	1403	3580	709	1353	1232	2935	650	1223	620	1113
	median (sdc-2 / ctrl) ratio	1.77	0.64	1.70576	0.658593	1.72953	0.632239	1.67188	0.648188	1.66822	0.65527
	mean (sdc-2 / ctrl) ratio ± SEM	1.94 ± 0.02	0.91 ± 0.01	2.03 ± 0.14	1.12 ± 0.12	1.90 ± 0.02	0.88 ± 0.01	1.96 ± 0.15	0.98 ± 0.08	1.96 ± 0.16	0.97 ± 0.08
	sdc-2 > ctrl	1393 (99.3%)	1096 (30.6%)	708 (99.9%)	500 (37.0%)	1225 (99.4%)	893 (30.4%)	650 (100%)	432 (35.3%)	620 (100%)	398 (35.8%)
	ctrl > sdc-2	10 (0.7%)	2484 (69.4%)	1 (0.1%)	853 (63.0%)	7 (0.6%)	2042 (69.6%)	0 (0.0%)	791 (64.7%)	0 (0.0%)	715 (64.2%)
	sdc-2 > ctrl (≥ 1.5 fold)	1071 (76.3%)	449 (12.5%)	504 (71.1%)	133 (9.8%)	910 (73.9%)	362 (12.3%)	445 (68.4%)	112 (9.2%)	421 (67.9%)	94 (8.4%)
	ctrl > sdc-2 (≥ 1.5 fold)	10 (0.7%)	2024 (56.5%)	1 (0.1%)	717 (53.0%)	7 (0.6%)	1744 (59.4%)	0 (0.0%)	665 (54.4%)	0 (0.0%)	591 (53.1%)
	non-coding RNAs
		WormBase microRNA Primary Transcript
				microRNA with TSS Calls		WormBase tRNA
		(RPKM ≥1 in both conditions)		(RPKM ≥1 in both conditions)		(RPKM ≥ 1 in both conditions)
	Chromosome	X	A	X	A	X	A
	Total genes	29	77	16	31	225	232
	median (sdc-2 / ctrl) ratio	1.68	1.12	2.25857	1.38744	0.637665	0.512218
	mean (sdc-2 / ctrl) ratio ± SEM	2.31 ± 0.48	1.25 ± 0.10	3.31 ± 1.00	1.83 ± 0.26	0.75 ± 0.03	0.61 ± 0.02
	sdc-2 > ctrl (≥ 1.5 fold)	16 (55.2%)	17 (22.1%)	12 (75.0%)	13 (41.9%)	15 (6.7%)	8 (3.4%)
	ctrl > sdc-2 (≥ 1.5 fold)	2 (6.9%)	16 (20.8%)	2 (12.5%)	0 (0.0%)	119 (52.9%)	154 (66.4%)
